# Supplementary material for: Labile Dissolved Organic Matter Compound Characteristics Select for Divergence in Marine Bacterial Activity and Transcription
Source: Front Microbiol. 2020 Sep 25;11:588778. doi: 10.3389/fmicb.2020.588778 (PMC7546218; doi:10.3389/fmicb.2020.588778)
Supplement: Supplementary file 1 [file Table_4.xlsx]

## Sheet: seed1
compound_class	seed1	mono_sign	poly_sign	sign_group	sign_t_group	sum_mono	sum_poly	sum_cont	n
PR	Amino Acids	-	down	poly	poly	12313.11273	3304.87057	11049.597020000001	6
PR	Amino Acids	-	up	poly	poly	12362.93104	46373.57431	16261.8334	37
PR	Amino Acids	down	-	mono	mono	3325.2045399999997	6567.31974	13062.61181	18
PR	Amino Acids	down	down	DOWNcore	core	1258.80902	1231.40646	5578.32598	9
PR	Amino Acids	down	up	monoDOWN-polyUP	mixed	22.10124	253.64264	107.05492	1
PR	Amino Acids	up	-	mono	mono	76558.15689	23753.435110000002	24868.28419	46
PR	Amino Acids	up	down	monoUP-polyDOWN	mixed	2547.1225999999997	449.61365	1532.22353	2
PR	Amino Acids	up	up	UPcore	core	2095.6256	3379.07031	891.8057	8
PR	Arabinose Sensor and transport module	up	-	mono	mono	21.78587	3.17183	1.91169	1
PR	Autotrophy	up	down	monoUP-polyDOWN	mixed	1359.29808	217.59787	806.73528	1
PR	Carbohydrates	-	down	poly	poly	27641.02467	7956.21782	32087.80032	12
PR	Carbohydrates	-	up	poly	poly	13144.10986	41970.19739	17391.64515	34
PR	Carbohydrates	down	-	mono	mono	977.0715	2646.98789	4647.33047	21
PR	Carbohydrates	down	down	DOWNcore	core	881.3377	623.31983	3605.45674	8
PR	Carbohydrates	down	up	monoDOWN-polyUP	mixed	14.74596	346.33942	134.7745	1
PR	Carbohydrates	up	-	mono	mono	75112.31758	21736.11539	24042.43193	39
PR	Carbohydrates	up	down	monoUP-polyDOWN	mixed	4974.32846	579.80879	2099.99694	4
PR	Carbohydrates	up	up	UPcore	core	970.8215	842.5999400000001	247.5645	7
PR	Cell Division and Cell Cycle	-	up	poly	poly	4965.31266	11791.75405	5668.17563	12
PR	Cell Division and Cell Cycle	down	-	mono	mono	243.96918	559.69218	909.96681	1
PR	Cell Division and Cell Cycle	up	-	mono	mono	1890.10023	1006.89562	768.5013799999999	4
PR	Cell Division and Cell Cycle	up	down	monoUP-polyDOWN	mixed	186.84129	11.47606	42.05729	1
PR	Cell Division and Cell Cycle	up	up	UPcore	core	1135.99962	1299.64684	487.48222	1
PR	Cell Wall and Capsule	-	down	poly	poly	3235.02419	1048.89541	4638.72788	2
PR	Cell Wall and Capsule	-	up	poly	poly	6915.3167	23754.61933	9471.49278	27
PR	Cell Wall and Capsule	down	-	mono	mono	500.55536	1178.97354	2338.00297	5
PR	Cell Wall and Capsule	down	down	DOWNcore	core	47.42492	43.89502	282.93085	2
PR	Cell Wall and Capsule	up	-	mono	mono	13980.333419999999	2663.42135	1840.0064	19
PR	Cell Wall and Capsule	up	down	monoUP-polyDOWN	mixed	229.34996	27.32023	56.395	1
PR	Cell Wall and Capsule	up	up	UPcore	core	1275.1308099999999	1645.19767	769.45723	4
PR	Central metabolism	-	up	poly	poly	334.42739	1659.9502	399.54425	1
PR	Central metabolism	up	-	mono	mono	4880.10119	209.98994	151.0239	1
PR	DNA Metabolism	-	down	poly	poly	1281.89289	326.70844999999997	1046.653	3
PR	DNA Metabolism	-	up	poly	poly	9253.833489999999	28735.1754	10257.19944	29
PR	DNA Metabolism	down	-	mono	mono	11.72386	46.758539999999996	51.615759999999995	2
PR	DNA Metabolism	down	down	DOWNcore	core	77.94651	37.53769	398.5884	1
PR	DNA Metabolism	up	-	mono	mono	2280.80063	509.65015	357.48696	9
PR	DNA Metabolism	up	down	monoUP-polyDOWN	mixed	4436.00748	267.18192	1258.85115	1
PR	DNA Metabolism	up	up	UPcore	core	3863.99329	5091.31148	1609.64717	14
PR	Dormancy and Sporulation	-	up	poly	poly	433.97983	2178.70855	457.85095	1
PR	Dormancy and Sporulation	up	-	mono	mono	2142.67582	106.33840000000001	78.37949	2
PR	Fatty Acids and Lipids	-	down	poly	poly	9764.762509999999	2635.3815	7512.96129	3
PR	Fatty Acids and Lipids	-	up	poly	poly	2942.16456	9887.84298	4155.06905	16
PR	Fatty Acids and Lipids	down	-	mono	mono	11.27246	21.69586	84.11458	1
PR	Fatty Acids and Lipids	down	down	DOWNcore	core	158.8228	170.85399999999998	936.73054	2
PR	Fatty Acids and Lipids	up	-	mono	mono	44389.15766	13881.82581	17941.257419999998	13
PR	Fatty Acids and Lipids	up	up	UPcore	core	299.07093	647.75288	212.19814	1
PR	General Stress Response and Stationary Phase Response	up	-	mono	mono	2286.13276	162.03447	214.10984000000002	2
PR	Iron acquisition and metabolism	-	down	poly	poly	1801.1289299999999	504.23344	2370.50178	2
PR	Iron acquisition and metabolism	-	up	poly	poly	139.41679000000002	1301.78809	375.64807	2
PR	Iron acquisition and metabolism	down	-	mono	mono	11881.822600000001	13087.265379999999	44312.13392	3
PR	Iron acquisition and metabolism	down	down	DOWNcore	core	158.68864	174.16649	1236.86666	1
PR	Iron acquisition and metabolism	up	-	mono	mono	2933.97112	771.50635	688.21019	3
PR	Membrane Transport	-	down	poly	poly	15014.2288	4846.50134	19009.89493	18
PR	Membrane Transport	-	up	poly	poly	2521.69487	10145.27179	3240.32302	17
PR	Membrane Transport	down	-	mono	mono	13267.58094	16039.84181	49633.336910000005	26
PR	Membrane Transport	down	down	DOWNcore	core	2632.10388	2189.09634	13003.34931	16
PR	Membrane Transport	up	-	mono	mono	34201.81735	5654.46517	3821.47822	54
PR	Membrane Transport	up	down	monoUP-polyDOWN	mixed	5804.56852	334.40672	959.67088	4
PR	Membrane Transport	up	up	UPcore	core	2729.41777	3953.6613700000003	1128.85588	6
PR	Metabolism of Aromatic Compounds	-	down	poly	poly	567.88303	478.49546	1714.7904	1
PR	Metabolism of Aromatic Compounds	-	up	poly	poly	1382.6390000000001	5556.3835500000005	1813.24269	8
PR	Metabolism of Aromatic Compounds	down	-	mono	mono	201.15797	653.52024	967.31767	7
PR	Metabolism of Aromatic Compounds	down	down	DOWNcore	core	349.36933	314.40811	2049.33703	4
PR	Metabolism of Aromatic Compounds	down	up	monoDOWN-polyUP	mixed	80.63230000000001	679.22055	216.02153	2
PR	Metabolism of Aromatic Compounds	up	-	mono	mono	41109.83407	12506.036310000001	15150.18276	10
PR	Metabolite processes	-	down	poly	poly	367.89775	69.92198	203.59552	1
PR	Metabolite processes	-	up	poly	poly	2908.78067	7565.37806	3388.47937	5
PR	Metabolite processes	up	-	mono	mono	3086.75463	1600.67769	1206.27953	5
PR	Metabolite processes	up	up	UPcore	core	702.15101	708.11869	257.12298	1
PR	Miscellaneous	-	down	poly	poly	11257.88381	1800.2164699999998	11706.264229999999	5
PR	Miscellaneous	-	up	poly	poly	8233.55818	21427.7016	9021.288630000001	29
PR	Miscellaneous	down	-	mono	mono	757.02465	1849.82922	2284.4755	6
PR	Miscellaneous	up	-	mono	mono	29092.92323	5724.14909	4106.32082	26
PR	Miscellaneous	up	down	monoUP-polyDOWN	mixed	2671.03413	220.30073	1082.97521	4
PR	Miscellaneous	up	up	UPcore	core	1435.34199	2103.7955	424.39628	5
PR	Mitochondrial electron transport system in plants	up	-	mono	mono	907.68064	482.14026	514.24595	1
PR	Motility and Chemotaxis	-	down	poly	poly	12428.5833	2312.49988	14041.39966	23
PR	Motility and Chemotaxis	-	up	poly	poly	105.53858000000001	823.18196	201.68382	3
PR	Motility and Chemotaxis	down	-	mono	mono	0	3.18683	54.48331	1
PR	Motility and Chemotaxis	down	down	DOWNcore	core	459.75928	164.99164	1407.00751	4
PR	Motility and Chemotaxis	up	-	mono	mono	15840.93217	1621.44494	1731.03978	26
PR	Motility and Chemotaxis	up	down	monoUP-polyDOWN	mixed	4181.88419	119.03106	394.765	6
PR	Nitrogen Metabolism	-	down	poly	poly	4760.562	1902.8271	6632.62575	2
PR	Nitrogen Metabolism	-	up	poly	poly	3.04813	44.42699	1.91169	1
PR	Nitrogen Metabolism	down	-	mono	mono	2044.34937	2862.69687	8270.948339999999	4
PR	Nitrogen Metabolism	down	down	DOWNcore	core	73.89578	188.83572	726.44409	1
PR	Nitrogen Metabolism	up	-	mono	mono	1074.55189	352.43744	349.84019	5
PR	Nitrogen Metabolism	up	down	monoUP-polyDOWN	mixed	1359.29808	217.59787	806.73528	1
PR	Nucleosides and Nucleotides	-	down	poly	poly	1765.1571999999999	396.27713	1500.68057	6
PR	Nucleosides and Nucleotides	-	up	poly	poly	7934.86066	22239.87386	10047.86885	21
PR	Nucleosides and Nucleotides	down	-	mono	mono	82.63399	165.89226	530.49536	2
PR	Nucleosides and Nucleotides	down	down	DOWNcore	core	1716.31228	1545.83189	4797.39857	5
PR	Nucleosides and Nucleotides	down	up	monoDOWN-polyUP	mixed	111.59074	1178.15159	447.33663	1
PR	Nucleosides and Nucleotides	up	-	mono	mono	1780.52621	309.11605000000003	104.18737999999999	5
PR	Nucleosides and Nucleotides	up	down	monoUP-polyDOWN	mixed	1294.81668	20.69591	259.99052	1
PR	Nucleosides and Nucleotides	up	up	UPcore	core	702.15101	708.11869	257.12298	1
PR	Nucleotide sugars	-	up	poly	poly	1302.4246699999999	3942.6192499999997	1792.21405	3
PR	Nucleotide sugars	down	-	mono	mono	994.5344100000001	2719.93401	2719.38612	3
PR	Phages and Transposable Elements	-	up	poly	poly	642.35638	2055.21138	1005.55156	2
PR	Phages and Transposable Elements	down	-	mono	mono	573.56845	1969.90585	2348.5172900000002	3
PR	Phages and Transposable Elements	down	down	DOWNcore	core	1139.49107	852.37342	2390.57458	2
PR	Phages and Transposable Elements	up	-	mono	mono	282.20482	22.59015	2.86754	2
PR	Phosphorus Metabolism	-	down	poly	poly	891.8134	463.96222	1380.24378	1
PR	Phosphorus Metabolism	-	up	poly	poly	1138.7995	3085.60376	1063.85826	6
PR	Phosphorus Metabolism	down	-	mono	mono	950.51782	2604.1031199999998	3047.2418100000004	2
PR	Phosphorus Metabolism	up	-	mono	mono	4246.28212	596.01561	591.66959	6
PR	Phosphorus Metabolism	up	down	monoUP-polyDOWN	mixed	1079.1634	92.59545	250.43204	1
PR	Phosphorus Metabolism	up	up	UPcore	core	2023.9984100000001	2538.56692	918.56944	4
PR	Photosynthesis	down	-	mono	mono	107.94882	109.09558	717.8414700000001	5
PR	Potassium metabolism	-	up	poly	poly	171.0944	860.31801	216.97737999999998	2
PR	Potassium metabolism	down	-	mono	mono	66.76998	252.71936	241.82941	3
PR	Potassium metabolism	up	-	mono	mono	5354.13341	1916.04807	1142.23776	5
PR	Potassium metabolism	up	up	UPcore	core	188.00185	194.31943	35.36636	1
PR	Predictions based on plant-prokaryote comparative analysis	-	up	poly	poly	945.67535	3060.44075	1403.18412	5
PR	Predictions based on plant-prokaryote comparative analysis	up	-	mono	mono	1048.51421	92.3208	78.37948999999999	2
PR	Predictions based on plant-prokaryote comparative analysis	up	down	monoUP-polyDOWN	mixed	1140.86832	62.56537	238.00603	1
PR	Protein Metabolism	-	down	poly	poly	4928.32483	1946.98142	7009.22967	7
PR	Protein Metabolism	-	up	poly	poly	11478.58059	35208.94163	16535.20576	28
PR	Protein Metabolism	down	-	mono	mono	1005.03645	2892.82553	5677.734100000001	10
PR	Protein Metabolism	down	down	DOWNcore	core	156.14929	95.78961999999999	322.12061	2
PR	Protein Metabolism	down	up	monoDOWN-polyUP	mixed	118.15339	989.26021	332.63493	1
PR	Protein Metabolism	up	-	mono	mono	33884.58657	6325.75205	5795.30332	19
PR	Protein Metabolism	up	down	monoUP-polyDOWN	mixed	1003.13873	112.17076	371.82466999999997	3
PR	Protein Metabolism	up	up	UPcore	core	2361.04721	2435.21669	795.26512	6
PR	Regulation and Cell signaling	-	down	poly	poly	818.21621	323.48996	761.81045	1
PR	Regulation and Cell signaling	-	up	poly	poly	2665.52218	5112.05432	2316.01847	8
PR	Regulation and Cell signaling	down	-	mono	mono	0	2.31788	11.47017	1
PR	Regulation and Cell signaling	down	down	DOWNcore	core	406.84295	395.92448	1391.71394	2
PR	Regulation and Cell signaling	up	-	mono	mono	9289.64777	1204.17191	1375.46454	22
PR	Regulation and Cell signaling	up	down	monoUP-polyDOWN	mixed	982.35199	30.67805	106.09907	1
PR	Regulation and Cell signaling	up	up	UPcore	core	371.39313000000004	572.93715	163.44992	2
PR	Respiration	-	down	poly	poly	2292.54925	431.4756	2214.69864	5
PR	Respiration	-	up	poly	poly	4402.03279	11089.84627	3995.44249	16
PR	Respiration	down	-	mono	mono	484.86559	1965.02047	2882.83603	12
PR	Respiration	down	down	DOWNcore	core	3790.08216	2316.20796	12093.382459999999	12
PR	Respiration	down	up	monoDOWN-polyUP	mixed	228.64642	1983.39712	885.11478	1
PR	Respiration	up	-	mono	mono	18446.46937	5174.03237	5382.377219999999	15
PR	Respiration	up	down	monoUP-polyDOWN	mixed	4641.59354	534.89582	2684.97561	6
PR	Respiration	up	up	UPcore	core	1248.68674	1270.6350499999999	262.85806	4
PR	RNA Metabolism	-	down	poly	poly	2837.5246700000002	504.81806	2704.09256	7
PR	RNA Metabolism	-	up	poly	poly	7725.85959	29389.2874	11532.29997	26
PR	RNA Metabolism	down	-	mono	mono	1010.6789699999999	1876.88376	2921.06994	2
PR	RNA Metabolism	down	down	DOWNcore	core	176.41481	104.93914	663.35815	3
PR	RNA Metabolism	up	-	mono	mono	4604.72223	849.53192	1159.443	10
PR	RNA Metabolism	up	down	monoUP-polyDOWN	mixed	9024.46692	787.42151	3058.71197	5
PR	RNA Metabolism	up	up	UPcore	core	3759.62354	4336.16387	1610.6030300000002	5
PR	Secondary Metabolism	-	up	poly	poly	1.92644	65.69287	14.33771	1
PR	Secondary Metabolism	down	-	mono	mono	275.45268	724.77949	974.00859	1
PR	Secondary Metabolism	up	-	mono	mono	525.82738	238.24612	121.39263	2
PR	Stress Response	-	down	poly	poly	5962.54565	1333.61573	5375.6863	7
PR	Stress Response	-	up	poly	poly	5205.5368	14897.47601	6435.72117	15
PR	Stress Response	down	-	mono	mono	35.26124	194.06977	116.6134	4
PR	Stress Response	down	down	DOWNcore	core	1071.52605	951.61419	7344.732139999999	4
PR	Stress Response	down	up	monoDOWN-polyUP	mixed	69.67624	378.4364	177.78763	1
PR	Stress Response	up	-	mono	mono	41205.39116	6522.39806	5953.01819	40
PR	Stress Response	up	down	monoUP-polyDOWN	mixed	6345.15575	556.31435	1752.06846	4
PR	Sulfur Metabolism	-	up	poly	poly	42.29997	123.29051	34.41051	1
PR	Sulfur Metabolism	down	-	mono	mono	658.79429	1921.46677	2881.88018	9
PR	Sulfur Metabolism	down	down	DOWNcore	core	858.10838	501.11026	3075.91723	4
PR	Sulfur Metabolism	up	-	mono	mono	4081.2854199999997	538.09231	279.10747	3
PR	Sulfur Metabolism	up	down	monoUP-polyDOWN	mixed	2408.80827	219.78842	877.468	2
PR	Transcriptional regulation	-	up	poly	poly	885.79153	2102.25058	772.32477	2
PR	Transcriptional regulation	down	down	DOWNcore	core	71.07226	36.26642	246.60865	1
PR	Unclassified	-	down	poly	poly	8053.62478	3402.32177	10117.64571	4
PR	Unclassified	-	up	poly	poly	11338.65189	34962.25346	14795.56332	59
PR	Unclassified	down	-	mono	mono	15449.14045	17622.63147	54583.67106	7
PR	Unclassified	down	down	DOWNcore	core	282.67162	112.73139	705.41545	1
PR	Unclassified	up	-	mono	mono	33870.0151	6485.34532	7673.54367	67
PR	Unclassified	up	up	UPcore	core	4837.32679	4935.205	1528.40014	17
PR	Virulence	-	down	poly	poly	9907.35076	1483.79316	9080.55117	10
PR	Virulence	-	up	poly	poly	4736.81393	14543.390080000001	6684.24151	14
PR	Virulence	down	-	mono	mono	54.05708	36.00644	193.08119	1
PR	Virulence	down	up	monoDOWN-polyUP	mixed	58.75214	1340.71603	354.61942	3
PR	Virulence	up	-	mono	mono	13213.03099	2765.41265	1920.2975999999999	23
PR	Virulence	up	down	monoUP-polyDOWN	mixed	1817.35851	100.5067	279.10747	1
PR	Virulence	up	up	UPcore	core	600.16154	585.74681	155.80314	3
PR	Vitamins	-	down	poly	poly	6446.48193	2173.30251	6980.55423	4
PR	Vitamins	-	up	poly	poly	18235.08951	61159.50505	23555.90557	67
PR	Vitamins	down	-	mono	mono	1270.40412	1996.0808499999998	3242.23468	8
PR	Vitamins	down	down	DOWNcore	core	2276.41638	1022.3438	5320.2471399999995	3
PR	Vitamins	down	up	monoDOWN-polyUP	mixed	24.40227	401.96149	98.45229	1
PR	Vitamins	up	-	mono	mono	58787.09841	16801.85777	20885.26771	34
PR	Vitamins	up	down	monoUP-polyDOWN	mixed	8596.11815	597.61652	2503.36458	7
PR	Vitamins	up	up	UPcore	core	3264.3986	3011.2357	1025.62436	8
CH	Amino Acids	-	down	poly	poly	2663.60612	748.06791	4100.81815	25
CH	Amino Acids	-	up	poly	poly	3951.26844	19643.15643	4787.093089999999	27
CH	Amino Acids	down	-	mono	mono	7285.7442	29706.41096	39213.81909	61
CH	Amino Acids	down	down	DOWNcore	core	4840.22287	6314.73754	30328.83172	42
CH	Amino Acids	down	up	monoDOWN-polyUP	mixed	269.39168	7303.823710000001	1203.71028	2
CH	Amino Acids	up	-	mono	mono	51967.58539	15714.971370000001	12942.72009	36
CH	Amino Acids	up	down	monoUP-polyDOWN	mixed	3313.05749	82.62198	489.36719	5
CH	Amino Acids	up	up	UPcore	core	28532.53551	24374.06536	3954.75219	35
CH	Arabinose Sensor and transport module	up	-	mono	mono	276.82493999999997	1.05124	2.45275	2
CH	Carbohydrates	-	down	poly	poly	4681.9305	652.1280399999999	4969.0985	36
CH	Carbohydrates	-	up	poly	poly	7515.46699	41806.25369	6629.27368	50
CH	Carbohydrates	down	-	mono	mono	7592.92695	29481.77807	35304.36053	39
CH	Carbohydrates	down	down	DOWNcore	core	1904.00746	2186.796	13256.4873	37
CH	Carbohydrates	down	up	monoDOWN-polyUP	mixed	20.41387	228.27201	75.32137	2
CH	Carbohydrates	up	-	mono	mono	94061.38508000001	21340.42051	18259.37941	81
CH	Carbohydrates	up	down	monoUP-polyDOWN	mixed	6909.91061	70.85563	644.69098	15
CH	Carbohydrates	up	up	UPcore	core	9418.474909999999	15772.97093	2236.69031	33
CH	Cell Division and Cell Cycle	-	up	poly	poly	223.51357	1513.50457	416.588	1
CH	Cell Division and Cell Cycle	down	-	mono	mono	777.8579599999999	1844.63486	3991.13814	3
CH	Cell Division and Cell Cycle	down	down	DOWNcore	core	1079.61784	2401.91149	8690.03724	7
CH	Cell Division and Cell Cycle	up	-	mono	mono	17724.39469	3399.09573	4827.640399999999	11
CH	Cell Division and Cell Cycle	up	up	UPcore	core	63.87847	128.62646	11.3625	1
CH	Cell Wall and Capsule	-	down	poly	poly	2231.94479	954.57853	4255.84257	14
CH	Cell Wall and Capsule	-	up	poly	poly	1496.39372	3650.10239	1332.11109	9
CH	Cell Wall and Capsule	down	-	mono	mono	446.80956	1554.34256	1958.00625	13
CH	Cell Wall and Capsule	down	down	DOWNcore	core	882.8539900000001	870.00284	5019.06911	4
CH	Cell Wall and Capsule	up	-	mono	mono	7503.09352	1493.66493	1835.52725	17
CH	Cell Wall and Capsule	up	up	UPcore	core	1161.2576299999998	3230.21192	352.10391000000004	6
CH	Central metabolism	-	down	poly	poly	468.57586	12.32774	356.06042	2
CH	Central metabolism	-	up	poly	poly	76.64513	282.00209	137.29138	1
CH	Central metabolism	down	-	mono	mono	414.5699	760.45783	1294.67773	1
CH	Central metabolism	down	down	DOWNcore	core	89.2843	80.12487	685.24671	2
CH	DNA Metabolism	-	down	poly	poly	3.5457	1.05124	36.89635	1
CH	DNA Metabolism	-	up	poly	poly	302.82147	2314.32953	553.38912	5
CH	DNA Metabolism	down	-	mono	mono	602.33296	988.48529	2343.4338000000002	7
CH	DNA Metabolism	down	down	DOWNcore	core	277.67048	305.35713	1148.87887	5
CH	DNA Metabolism	up	-	mono	mono	9515.94579	4666.85985	2945.7766	18
CH	DNA Metabolism	up	down	monoUP-polyDOWN	mixed	426.75859	104.59404	262.14085	1
CH	DNA Metabolism	up	up	UPcore	core	3962.2999800000002	2514.2248200000004	497.07601999999997	6
CH	Dormancy and Sporulation	-	up	poly	poly	245.11884	4021.67478	486.17401	1
CH	Dormancy and Sporulation	up	up	UPcore	core	336.68845	114.50366	59.81951	1
CH	Fatty Acids and Lipids	-	down	poly	poly	1401.59178	709.40219	3214.54991	7
CH	Fatty Acids and Lipids	-	up	poly	poly	36.59733	365.66357	74.62191	3
CH	Fatty Acids and Lipids	down	-	mono	mono	2010.5661300000002	11509.907669999999	11802.40063	19
CH	Fatty Acids and Lipids	down	down	DOWNcore	core	261.16727	238.39970000000002	1790.23438	9
CH	Fatty Acids and Lipids	up	-	mono	mono	3831.18477	1406.80867	533.10117	7
CH	Fatty Acids and Lipids	up	up	UPcore	core	780.75032	934.2605100000001	30.45948	3
CH	General Stress Response and Stationary Phase Response	up	-	mono	mono	303.70498	23.97423	31.39909	1
CH	General Stress Response and Stationary Phase Response	up	up	UPcore	core	9293.88483	7057.10891	1448.39144	1
CH	Iron acquisition and metabolism	-	down	poly	poly	367.08084	163.4054	633.45163	1
CH	Iron acquisition and metabolism	down	-	mono	mono	3175.90147	24610.55226	18450.099739999998	2
CH	Iron acquisition and metabolism	down	up	monoDOWN-polyUP	mixed	139.7951	1832.05128	595.71757	1
CH	Iron acquisition and metabolism	up	-	mono	mono	4529.29816	1178.60604	390.00205	4
CH	Iron acquisition and metabolism	up	up	UPcore	core	240.8073	65.93721	7.57378	1
CH	Membrane Transport	-	down	poly	poly	5568.29804	900.52379	4984.88079	39
CH	Membrane Transport	-	up	poly	poly	678.05859	8404.89119	756.73322	23
CH	Membrane Transport	down	-	mono	mono	4384.81949	31932.36907	24201.225159999998	33
CH	Membrane Transport	down	down	DOWNcore	core	342.85478	404.72261000000003	1964.45826	10
CH	Membrane Transport	down	up	monoDOWN-polyUP	mixed	511.51514	8714.102859999999	2149.51455	4
CH	Membrane Transport	up	-	mono	mono	44079.34532	6369.02951	6793.64142	67
CH	Membrane Transport	up	down	monoUP-polyDOWN	mixed	8010.91083	126.36766	979.57546	16
CH	Membrane Transport	up	up	UPcore	core	1446.10321	676.0767999999999	159.65108	3
CH	Metabolism of Aromatic Compounds	-	down	poly	poly	518.11531	175.5113	839.9094699999999	16
CH	Metabolism of Aromatic Compounds	-	up	poly	poly	320.4715	1338.06442	148.80357	2
CH	Metabolism of Aromatic Compounds	down	-	mono	mono	1121.11668	7389.6465	6014.21706	8
CH	Metabolism of Aromatic Compounds	down	down	DOWNcore	core	30.54089	59.29099	713.10643	5
CH	Metabolism of Aromatic Compounds	down	up	monoDOWN-polyUP	mixed	257.71125	7161.12701	1144.66239	1
CH	Metabolism of Aromatic Compounds	up	-	mono	mono	9234.823769999999	501.35152	422.61567	18
CH	Metabolism of Aromatic Compounds	up	down	monoUP-polyDOWN	mixed	488.1698	8.28912	70.77291	2
CH	Metabolism of Aromatic Compounds	up	up	UPcore	core	5209.5706	6398.44443	1354.48126	6
CH	Metabolite processes	-	up	poly	poly	208.21622	682.71129	217.6114	2
CH	Metabolite processes	down	-	mono	mono	122.64786000000001	427.35684999999995	625.01645	4
CH	Metabolite processes	down	down	DOWNcore	core	546.9725099999999	1358.94653	4452.46652	6
CH	Metabolite processes	up	-	mono	mono	4129.10173	611.04906	1112.44656	6
CH	Metabolite processes	up	down	monoUP-polyDOWN	mixed	1534.98478	20.90244	136.03573	1
CH	Metabolite processes	up	up	UPcore	core	4180.86344	4591.17432	1363.10246	6
CH	Miscellaneous	-	down	poly	poly	2355.92886	1105.14907	4360.98014	13
CH	Miscellaneous	-	up	poly	poly	744.97624	3400.37955	956.23115	7
CH	Miscellaneous	down	-	mono	mono	2386.43546	8712.56711	13292.44191	26
CH	Miscellaneous	down	down	DOWNcore	core	534.26049	818.56691	3708.7324	9
CH	Miscellaneous	down	up	monoDOWN-polyUP	mixed	13.47829	124.80957	43.22368	1
CH	Miscellaneous	up	-	mono	mono	19566.79405	5209.60318	4218.55984	26
CH	Miscellaneous	up	down	monoUP-polyDOWN	mixed	432.41893000000005	56.67151	191.35893	2
CH	Miscellaneous	up	up	UPcore	core	4357.87103	2893.48214	794.24568	8
CH	Mitochondrial electron transport system in plants	down	-	mono	mono	4604.64829	14952.63523	26751.1476	10
CH	Motility and Chemotaxis	-	down	poly	poly	798.35654	22.79806	401.21102	3
CH	Motility and Chemotaxis	-	up	poly	poly	8641.36456	59228.03146	7180.67594	20
CH	Motility and Chemotaxis	down	-	mono	mono	714.94377	2214.3181799999998	3873.05301	5
CH	Motility and Chemotaxis	down	down	DOWNcore	core	64.69028	54.24868	835.96154	2
CH	Motility and Chemotaxis	down	up	monoDOWN-polyUP	mixed	150.26246	2096.53053	585.98713	1
CH	Motility and Chemotaxis	up	-	mono	mono	10543.7608	2798.71202	1617.32508	7
CH	Motility and Chemotaxis	up	up	UPcore	core	136945.85381	119955.90035	8796.96474	33
CH	Nitrogen Metabolism	-	down	poly	poly	1148.82391	416.75149	1307.44164	4
CH	Nitrogen Metabolism	-	up	poly	poly	45.53306	484.90894000000003	52.60912	4
CH	Nitrogen Metabolism	down	-	mono	mono	944.35817	3937.0226	7277.28435	9
CH	Nitrogen Metabolism	down	down	DOWNcore	core	1321.11026	1394.95784	6452.83528	7
CH	Nitrogen Metabolism	up	-	mono	mono	970.06795	372.84588	225.93581	2
CH	Nitrogen Metabolism	up	up	UPcore	core	877.63924	996.2826799999999	345.12099	4
CH	Nucleosides and Nucleotides	-	down	poly	poly	186.48141	54.649210000000004	283.70065999999997	8
CH	Nucleosides and Nucleotides	-	up	poly	poly	221.63307	932.36134	207.55199	4
CH	Nucleosides and Nucleotides	down	-	mono	mono	1772.93987	6159.487840000001	8544.74911	13
CH	Nucleosides and Nucleotides	down	down	DOWNcore	core	2919.68244	4503.6157299999995	18469.12807	22
CH	Nucleosides and Nucleotides	up	-	mono	mono	8003.24055	1458.85665	2046.42487	16
CH	Nucleosides and Nucleotides	up	up	UPcore	core	992.97239	381.54869	22.55422	4
CH	Nucleotide sugars	-	down	poly	poly	453.74406	195.29359	595.06086	2
CH	Nucleotide sugars	-	up	poly	poly	490.94955	1839.4882400000001	485.6703	2
CH	Nucleotide sugars	down	down	DOWNcore	core	131.25885	181.37724	959.43731	1
CH	Phages and Transposable Elements	-	down	poly	poly	2099.23823	1157.84279	5139.8523000000005	2
CH	Phages and Transposable Elements	down	-	mono	mono	211.15979	576.5646300000001	1170.90463	2
CH	Phages and Transposable Elements	down	down	DOWNcore	core	556.59092	885.71153	4729.13023	6
CH	Phages and Transposable Elements	up	-	mono	mono	598.39066	226.33729	272.84787	1
CH	Phosphorus Metabolism	-	down	poly	poly	94.04740000000001	42.92414	322.27754	2
CH	Phosphorus Metabolism	-	up	poly	poly	901.23143	4170.42909	502.39312	2
CH	Phosphorus Metabolism	down	-	mono	mono	197.58592	1605.3354900000002	1988.3315699999998	3
CH	Phosphorus Metabolism	down	down	DOWNcore	core	446.18437	1092.6323300000001	3592.98113	4
CH	Phosphorus Metabolism	down	up	monoDOWN-polyUP	mixed	11.94427	245.44246	56.81239	1
CH	Phosphorus Metabolism	up	-	mono	mono	1835.16382	146.38117999999997	342.33581	2
CH	Photosynthesis	-	down	poly	poly	49.893029999999996	18.93341	136.55358999999999	6
CH	Photosynthesis	down	-	mono	mono	74.50166	266.82536	972.97763	4
CH	Photosynthesis	down	down	DOWNcore	core	7.58561	2.6072300000000004	179.15361	8
CH	Plant cell walls and outer surfaces	-	up	poly	poly	5.73	110.32967	7.60665	1
CH	Plant cell walls and outer surfaces	up	-	mono	mono	1517.71766	714.7971	501.16506000000004	2
CH	Plant Glucosinolates	down	-	mono	mono	592.01525	1936.35814	2189.30042	2
CH	Plastidial (cyanobacterial) electron transport system	down	down	DOWNcore	core	0	0	7.34274	3
CH	Potassium metabolism	-	down	poly	poly	296.31138	142.64744	405.25022	1
CH	Potassium metabolism	-	up	poly	poly	496.8174	1426.17963	459.84446	2
CH	Potassium metabolism	down	-	mono	mono	108.36267	580.1170900000001	1254.8045	5
CH	Potassium metabolism	down	down	DOWNcore	core	17.86294	28.67573	269.22637	1
CH	Potassium metabolism	up	-	mono	mono	693.40706	117.46298	104.71973	2
CH	Potassium metabolism	up	up	UPcore	core	6514.713900000001	4548.35783	421.98282	4
CH	Predictions based on plant-prokaryote comparative analysis	-	down	poly	poly	334.94518	68.80569	670.32223	7
CH	Predictions based on plant-prokaryote comparative analysis	-	up	poly	poly	746.88268	2160.69153	603.9406	2
CH	Predictions based on plant-prokaryote comparative analysis	down	-	mono	mono	1926.65354	3800.74054	8848.3222	2
CH	Predictions based on plant-prokaryote comparative analysis	down	down	DOWNcore	core	233.97991	207.21289000000002	1883.13492	9
CH	Predictions based on plant-prokaryote comparative analysis	up	-	mono	mono	2316.73081	486.77581	377.66697	5
CH	Predictions based on plant-prokaryote comparative analysis	up	up	UPcore	core	361.94445	284.0469	118.66923	1
CH	Protein Metabolism	-	down	poly	poly	16101.94529	8793.94068	46941.0522	31
CH	Protein Metabolism	-	up	poly	poly	1101.22243	9939.89046	1461.04916	11
CH	Protein Metabolism	down	-	mono	mono	16338.30739	40777.315930000004	103705.10385	41
CH	Protein Metabolism	down	down	DOWNcore	core	9866.58285	11553.17038	67175.95613	30
CH	Protein Metabolism	down	up	monoDOWN-polyUP	mixed	77.91506	811.4112600000001	318.87667	2
CH	Protein Metabolism	up	-	mono	mono	22428.24981	6667.31146	8047.75936	18
CH	Protein Metabolism	up	up	UPcore	core	37768.807349999995	17761.32083	4560.46145	15
CH	Regulation and Cell signaling	-	down	poly	poly	250.39064000000002	88.75411	512.0518500000001	5
CH	Regulation and Cell signaling	-	up	poly	poly	324.69093	1163.61031	229.74014	5
CH	Regulation and Cell signaling	down	-	mono	mono	887.56135	3373.9192199999998	6082.10855	7
CH	Regulation and Cell signaling	down	down	DOWNcore	core	696.77663	715.71652	2382.86166	4
CH	Regulation and Cell signaling	down	up	monoDOWN-polyUP	mixed	68.17154	979.67862	366.15297	1
CH	Regulation and Cell signaling	up	-	mono	mono	8987.92039	1862.99909	2419.98417	16
CH	Regulation and Cell signaling	up	up	UPcore	core	21428.89643	11043.03983	2077.62321	16
CH	Respiration	-	down	poly	poly	1420.12338	299.93484	2872.62371	13
CH	Respiration	-	up	poly	poly	234.20613	2089.56414	465.44587	12
CH	Respiration	down	-	mono	mono	8036.38341	30297.57687	44162.87095	45
CH	Respiration	down	down	DOWNcore	core	716.46108	716.39841	7527.911	23
CH	Respiration	down	up	monoDOWN-polyUP	mixed	74.88981	965.49023	393.9898	2
CH	Respiration	up	-	mono	mono	11406.40265	839.20109	1061.71734	14
CH	Respiration	up	down	monoUP-polyDOWN	mixed	1718.11152	28.92908	205.13756999999998	2
CH	Respiration	up	up	UPcore	core	677.42423	205.91276000000002	13.39063	2
CH	RNA Metabolism	-	down	poly	poly	1193.46251	682.55399	2368.88456	7
CH	RNA Metabolism	-	up	poly	poly	1575.60359	7057.78706	2239.63326	4
CH	RNA Metabolism	down	-	mono	mono	7186.5522200000005	17901.29494	31559.62183	23
CH	RNA Metabolism	down	down	DOWNcore	core	3297.8018300000003	5135.061839999999	19265.16858	14
CH	RNA Metabolism	up	-	mono	mono	15490.77002	4697.5681700000005	3770.51337	15
CH	RNA Metabolism	up	down	monoUP-polyDOWN	mixed	358.11662	56.67151	182.36792	1
CH	RNA Metabolism	up	up	UPcore	core	13265.85354	18978.61195	2519.53283	8
CH	Secondary Metabolism	down	-	mono	mono	13.11874	39.67867	125.28693000000001	3
CH	Secondary Metabolism	down	down	DOWNcore	core	5.69841	9.2458	42.19179	1
CH	Secondary Metabolism	up	-	mono	mono	1406.63447	713.55231	500.5368	1
CH	Secondary Metabolism	up	up	UPcore	core	524.37039	1854.72071	245.18805	1
CH	Stress Response	-	down	poly	poly	923.18795	412.63311999999996	1516.56794	11
CH	Stress Response	-	up	poly	poly	2744.56751	11607.54561	2557.96188	13
CH	Stress Response	down	-	mono	mono	1455.89446	4089.8881100000003	5768.50189	20
CH	Stress Response	down	down	DOWNcore	core	925.4063399999999	966.9765	5373.19727	13
CH	Stress Response	down	up	monoDOWN-polyUP	mixed	150.26246	2096.53053	585.98713	1
CH	Stress Response	up	-	mono	mono	19251.86469	5820.40656	5340.69177	27
CH	Stress Response	up	down	monoUP-polyDOWN	mixed	4242.83162	110.54043999999999	579.21141	5
CH	Stress Response	up	up	UPcore	core	9539.31324	11640.268469999999	1065.46341	16
CH	Sulfur Metabolism	-	down	poly	poly	703.04163	308.47967	1439.17682	7
CH	Sulfur Metabolism	-	up	poly	poly	823.23819	3028.08116	708.14073	5
CH	Sulfur Metabolism	down	-	mono	mono	1050.94478	2543.9880900000003	4466.491	7
CH	Sulfur Metabolism	down	down	DOWNcore	core	1042.74673	1306.2710200000001	7868.6224	8
CH	Sulfur Metabolism	up	-	mono	mono	979.19417	303.46869	318.06202	4
CH	Sulfur Metabolism	up	down	monoUP-polyDOWN	mixed	112.14152	0.93691	16.45248	1
CH	Sulfur Metabolism	up	up	UPcore	core	1042.91361	2390.28892	336.00849	3
CH	Transcriptional regulation	-	down	poly	poly	595.54074	409.45267	1191.01948	1
CH	Transcriptional regulation	down	down	DOWNcore	core	116.29151	138.55733	375.20885	1
CH	Transcriptional regulation	up	up	UPcore	core	336.68845	114.50366	59.81951	1
CH	Unclassified	-	down	poly	poly	2005.83482	404.42638999999997	2353.24973	16
CH	Unclassified	-	up	poly	poly	2042.15205	9186.29378	1748.28712	81
CH	Unclassified	down	-	mono	mono	6680.24913	35251.82959	39186.49826	30
CH	Unclassified	down	down	DOWNcore	core	2311.54613	3787.43104	14934.00746	18
CH	Unclassified	down	up	monoDOWN-polyUP	mixed	54.89656	572.87567	199.67137	1
CH	Unclassified	up	-	mono	mono	40577.88301	7291.72673	8657.02051	126
CH	Unclassified	up	down	monoUP-polyDOWN	mixed	2842.0891699999997	27.74242	263.82676	3
CH	Unclassified	up	up	UPcore	core	11201.63782	7293.942950000001	822.57936	41
CH	Virulence	-	down	poly	poly	7216.83791	3950.61485	22019.64674	11
CH	Virulence	-	up	poly	poly	6047.47513	46536.01018	5422.97202	15
CH	Virulence	down	-	mono	mono	8047.1551	20153.55203	49565.35177	16
CH	Virulence	down	down	DOWNcore	core	2602.6929600000003	4237.23981	14038.88192	4
CH	Virulence	up	-	mono	mono	26958.28336	6014.13855	6094.14905	15
CH	Virulence	up	up	UPcore	core	65800.25837	70977.36649	3665.96407	12
CH	Vitamins	-	down	poly	poly	4843.5417	1483.28122	7956.17752	33
CH	Vitamins	-	up	poly	poly	3255.2409199999997	21031.96359	3331.20927	13
CH	Vitamins	down	-	mono	mono	4821.32437	19596.30524	25233.16034	59
CH	Vitamins	down	down	DOWNcore	core	2739.91277	4304.20178	16648.03349	34
CH	Vitamins	down	up	monoDOWN-polyUP	mixed	54.89656	572.87567	199.67137	1
CH	Vitamins	up	-	mono	mono	58333.211070000005	16824.970550000002	16722.28881	51
CH	Vitamins	up	down	monoUP-polyDOWN	mixed	2067.42579	23.595519999999997	182.43356	7
CH	Vitamins	up	up	UPcore	core	5720.71206	7192.00299	1415.62599	15
Nuc	Amino Acids	-	down	poly	poly	368.77225	222.09808	1040.98876	9
Nuc	Amino Acids	-	up	poly	poly	2877.9865800000002	3360.7393399999996	1277.4433	2
Nuc	Amino Acids	down	-	mono	mono	1930.39892	4065.95229	6744.63161	22
Nuc	Amino Acids	down	down	DOWNcore	core	1817.6233499999998	1822.38131	8325.84295	19
Nuc	Amino Acids	up	-	mono	mono	2169.17658	1526.31738	704.82696	6
Nuc	Amino Acids	up	up	UPcore	core	26649.12418	24755.48864	4493.99944	36
Nuc	Carbohydrates	-	down	poly	poly	263.47835	140.73514	829.89453	6
Nuc	Carbohydrates	down	-	mono	mono	2249.567	3206.13877	8346.28383	23
Nuc	Carbohydrates	down	down	DOWNcore	core	1811.63006	2200.4591	9008.75447	27
Nuc	Carbohydrates	up	-	mono	mono	580.77137	321.91898000000003	104.24403000000001	4
Nuc	Carbohydrates	up	up	UPcore	core	22547.37935	20930.39039	2755.75518	29
Nuc	Cell Division and Cell Cycle	-	down	poly	poly	0	0	3.6006	1
Nuc	Cell Division and Cell Cycle	down	-	mono	mono	318.56703	420.21153	842.19987	2
Nuc	Cell Wall and Capsule	-	down	poly	poly	3.60592	1.01137	10.23382	1
Nuc	Cell Wall and Capsule	down	-	mono	mono	494.01887999999997	1382.26194	2386.60795	9
Nuc	Cell Wall and Capsule	down	down	DOWNcore	core	292.78685	286.90048	1058.73161	4
Nuc	Cell Wall and Capsule	up	-	mono	mono	899.21385	649.54407	268.60972	3
Nuc	Cell Wall and Capsule	up	up	UPcore	core	1499.62829	1501.0689499999999	255.21277	4
Nuc	Central metabolism	-	down	poly	poly	78.55248	28.11608	316.4291	1
Nuc	Central metabolism	down	down	DOWNcore	core	160.15301	165.80738	685.24671	2
Nuc	DNA Metabolism	-	down	poly	poly	5.24111	2.49873	20.95435	1
Nuc	DNA Metabolism	down	-	mono	mono	17.09797	40.820350000000005	103.51437999999999	2
Nuc	DNA Metabolism	down	down	DOWNcore	core	16.87041	19.70117	299.90893	1
Nuc	DNA Metabolism	up	-	mono	mono	749.24329	358.31275	150.88574	3
Nuc	DNA Metabolism	up	up	UPcore	core	4459.66834	4924.9272200000005	583.09156	9
Nuc	Fatty Acids and Lipids	-	down	poly	poly	7.92176	2.34843	20.33434	3
Nuc	Fatty Acids and Lipids	down	-	mono	mono	299.84389	404.67405	1141.82441	4
Nuc	Fatty Acids and Lipids	down	down	DOWNcore	core	893.5757	811.6012400000001	4196.28801	4
Nuc	Fatty Acids and Lipids	up	-	mono	mono	808.35976	569.56108	87.25827	4
Nuc	Fatty Acids and Lipids	up	up	UPcore	core	2656.8107299999997	2574.15085	265.49229	2
Nuc	Membrane Transport	-	down	poly	poly	11.23168	3.3904199999999998	45.36872	3
Nuc	Membrane Transport	-	up	poly	poly	786.11585	713.80095	315.67233	1
Nuc	Membrane Transport	down	-	mono	mono	522.54863	736.42835	4236.36064	20
Nuc	Membrane Transport	down	down	DOWNcore	core	857.33727	708.53665	3355.68085	13
Nuc	Membrane Transport	up	-	mono	mono	2127.49424	1226.89641	243.84299000000001	6
Nuc	Membrane Transport	up	up	UPcore	core	5851.7954899999995	5277.10453	788.7949	13
Nuc	Metabolism of Aromatic Compounds	-	down	poly	poly	0.96975	0	3.6006	1
Nuc	Metabolism of Aromatic Compounds	-	up	poly	poly	42.79805	50.03701	6.28986	1
Nuc	Metabolism of Aromatic Compounds	down	-	mono	mono	98.37831	183.45597	677.52992	5
Nuc	Metabolism of Aromatic Compounds	down	down	DOWNcore	core	125.22117	123.54223	1053.42227	10
Nuc	Metabolism of Aromatic Compounds	up	-	mono	mono	277.53346	118.73527	15.268980000000001	1
Nuc	Metabolism of Aromatic Compounds	up	up	UPcore	core	822.81877	769.83022	257.10491	1
Nuc	Metabolite processes	-	down	poly	poly	41.795519999999996	18.91179	155.99739	2
Nuc	Metabolite processes	down	down	DOWNcore	core	40.88222	44.14322	144.86239	2
Nuc	Metabolite processes	up	-	mono	mono	1304.42462	918.33025	428.43339000000003	2
Nuc	Metabolite processes	up	up	UPcore	core	7652.45613	6084.40583	1692.99108	7
Nuc	Miscellaneous	-	down	poly	poly	412.41089999999997	261.10757	1017.42382	6
Nuc	Miscellaneous	-	up	poly	poly	786.11585	713.80095	315.67233	1
Nuc	Miscellaneous	down	-	mono	mono	380.54831	765.61546	1400.09005	7
Nuc	Miscellaneous	down	down	DOWNcore	core	83.79498000000001	74.19119	417.56039000000004	6
Nuc	Miscellaneous	up	-	mono	mono	2016.44767	1562.33284	641.08629	5
Nuc	Miscellaneous	up	up	UPcore	core	6658.2735999999995	5653.2212	1758.91598	7
Nuc	Motility and Chemotaxis	-	up	poly	poly	995.49361	1378.59174	315.3648	1
Nuc	Motility and Chemotaxis	down	-	mono	mono	2.29658	17.93853	31.77714	1
Nuc	Motility and Chemotaxis	down	down	DOWNcore	core	26.221400000000003	25.62281	243.21299	2
Nuc	Motility and Chemotaxis	up	up	UPcore	core	2951.78767	2242.01897	291.26715	6
Nuc	Nitrogen Metabolism	down	-	mono	mono	101.48063	679.4219	744.8843400000001	5
Nuc	Nitrogen Metabolism	down	down	DOWNcore	core	58.4961	63.02438	411.3256	5
Nuc	Nitrogen Metabolism	up	-	mono	mono	2044.3527	1024.13734	138.7844	4
Nuc	Nitrogen Metabolism	up	up	UPcore	core	569.98074	452.53161	13.772319999999999	4
Nuc	Nucleosides and Nucleotides	-	down	poly	poly	123.74907	23.91018	227.62501	5
Nuc	Nucleosides and Nucleotides	-	up	poly	poly	196.87017	281.60609	58.23334	2
Nuc	Nucleosides and Nucleotides	down	-	mono	mono	331.35218000000003	754.94075	1310.53499	4
Nuc	Nucleosides and Nucleotides	down	down	DOWNcore	core	258.70105	237.45297	1148.97529	6
Nuc	Nucleosides and Nucleotides	up	-	mono	mono	2631.51121	1343.06872	465.90891999999997	4
Nuc	Nucleosides and Nucleotides	up	up	UPcore	core	7346.5788299999995	6048.63534	852.78778	12
Nuc	Nucleotide sugars	down	-	mono	mono	307.84986	384.00199	959.43731	1
Nuc	Nucleotide sugars	down	down	DOWNcore	core	64.32876	57.67521	268.42074	1
Nuc	Phages and Transposable Elements	-	down	poly	poly	11.06095	0.82053	28.31808	1
Nuc	Phages and Transposable Elements	down	down	DOWNcore	core	307.17257	219.24573	1250.02022	3
Nuc	Phages and Transposable Elements	up	up	UPcore	core	341.23238	243.8621	60.21308	1
Nuc	Phosphorus Metabolism	down	-	mono	mono	505.12894	735.32882	1550.30054	3
Nuc	Phosphorus Metabolism	down	down	DOWNcore	core	437.56885	339.26695	1670.678	3
Nuc	Phosphorus Metabolism	up	up	UPcore	core	658.16595	459.32097	125.71605	2
Nuc	Photosynthesis	-	down	poly	poly	0	0.14838	11.60629	2
Nuc	Photosynthesis	down	-	mono	mono	91.57271	134.0005	368.07244000000003	3
Nuc	Photosynthesis	down	down	DOWNcore	core	8.99082	3.78975	168.33351	9
Nuc	Plastidial (cyanobacterial) electron transport system	down	-	mono	mono	0	0	1.69848	1
Nuc	Plastidial (cyanobacterial) electron transport system	down	down	DOWNcore	core	0.25126	0	5.64426	3
Nuc	Potassium metabolism	down	-	mono	mono	209.27327	493.89144	1141.24932	3
Nuc	Potassium metabolism	up	up	UPcore	core	4017.43432	3617.0952700000003	721.3515900000001	4
Nuc	Predictions based on plant-prokaryote comparative analysis	-	down	poly	poly	184.99024	92.76044	367.99117	3
Nuc	Predictions based on plant-prokaryote comparative analysis	-	up	poly	poly	340.41619	320.11808	144.01497	1
Nuc	Predictions based on plant-prokaryote comparative analysis	down	-	mono	mono	79.85148	108.16927	292.45333	1
Nuc	Predictions based on plant-prokaryote comparative analysis	down	down	DOWNcore	core	121.57953	114.98424	495.66877	5
Nuc	Predictions based on plant-prokaryote comparative analysis	up	-	mono	mono	2225.1942599999998	1556.6758599999998	603.9406	2
Nuc	Protein Metabolism	-	down	poly	poly	203.58655000000002	97.53562000000001	383.65008	3
Nuc	Protein Metabolism	-	up	poly	poly	850.2731	976.1993600000001	338.56713	3
Nuc	Protein Metabolism	down	-	mono	mono	794.94746	1073.2268100000001	2144.48593	6
Nuc	Protein Metabolism	down	down	DOWNcore	core	345.49303	438.73607000000004	1749.53818	6
Nuc	Protein Metabolism	up	-	mono	mono	1820.6749399999999	1105.1042400000001	735.0818300000001	2
Nuc	Protein Metabolism	up	up	UPcore	core	6378.34169	8090.58828	1176.84472	9
Nuc	Regulation and Cell signaling	down	-	mono	mono	931.49811	1281.76838	2649.99608	4
Nuc	Regulation and Cell signaling	down	down	DOWNcore	core	99.14329000000001	99.70282	422.65132000000006	2
Nuc	Regulation and Cell signaling	up	-	mono	mono	738.23311	480.4955	213.36606	2
Nuc	Regulation and Cell signaling	up	up	UPcore	core	1626.96889	1216.59384	403.14983	8
Nuc	Respiration	-	down	poly	poly	109.31345	53.92629	379.38135	5
Nuc	Respiration	down	-	mono	mono	1133.92902	2022.0337399999999	5888.00511	11
Nuc	Respiration	down	down	DOWNcore	core	949.3883999999999	946.9163000000001	5988.00655	8
Nuc	Respiration	up	-	mono	mono	843.4203	418.20813000000004	75.92586	3
Nuc	Respiration	up	up	UPcore	core	840.6696	430.60907	69.49168	4
Nuc	RNA Metabolism	down	-	mono	mono	421.27054	643.14234	1336.68181	6
Nuc	RNA Metabolism	down	down	DOWNcore	core	34.81453	42.02761	154.23058	1
Nuc	RNA Metabolism	up	-	mono	mono	107.39671	44.19985	17.80942	1
Nuc	RNA Metabolism	up	up	UPcore	core	3270.26276	2523.2963	446.90672	6
Nuc	Secondary Metabolism	down	down	DOWNcore	core	16.24946	17.74995	95.86662000000001	2
Nuc	Stress Response	-	down	poly	poly	60.27456	26.56554	175.43063	3
Nuc	Stress Response	-	up	poly	poly	155.40791	186.13156	53.11596	1
Nuc	Stress Response	down	-	mono	mono	1210.79881	1836.28213	3945.45719	10
Nuc	Stress Response	down	down	DOWNcore	core	180.22316999999998	255.77594000000002	1674.63439	4
Nuc	Stress Response	up	-	mono	mono	5502.20363	3718.34688	1814.94496	6
Nuc	Stress Response	up	up	UPcore	core	4503.34786	3308.58317	360.00370000000004	7
Nuc	Sulfur Metabolism	-	down	poly	poly	16.46138	7.36837	52.79819	1
Nuc	Sulfur Metabolism	down	-	mono	mono	542.87294	910.3588599999999	2702.5663	2
Nuc	Sulfur Metabolism	down	down	DOWNcore	core	15.99942	16.84659	75.21183	1
Nuc	Sulfur Metabolism	up	-	mono	mono	2091.55393	1422.29603	601.7554	2
Nuc	Sulfur Metabolism	up	up	UPcore	core	2735.10824	2786.64523	182.40156000000002	4
Nuc	Unclassified	-	down	poly	poly	89.15427	31.481559999999998	239.31984	5
Nuc	Unclassified	-	up	poly	poly	2580.30004	3152.05485	1161.44234	2
Nuc	Unclassified	down	-	mono	mono	1439.20642	2473.63712	4102.47966	11
Nuc	Unclassified	down	down	DOWNcore	core	689.25691	820.71324	3053.84973	12
Nuc	Unclassified	up	-	mono	mono	1141.58348	656.8787	20.86119	24
Nuc	Unclassified	up	up	UPcore	core	10784.78624	9266.54405	1683.75984	57
Nuc	Virulence	-	down	poly	poly	21.3151	8.38834	65.51485	1
Nuc	Virulence	down	-	mono	mono	375.57939	820.36663	2139.42151	10
Nuc	Virulence	up	-	mono	mono	1408.25162	978.04308	331.84728	5
Nuc	Virulence	up	up	UPcore	core	3622.48587	3133.36872	592.5664	7
Nuc	Vitamins	-	down	poly	poly	261.2137	124.82628	718.71044	6
Nuc	Vitamins	-	up	poly	poly	1614.96135	1539.03549	659.35867	3
Nuc	Vitamins	down	-	mono	mono	902.84622	1384.2661	3179.20476	13
Nuc	Vitamins	down	down	DOWNcore	core	1013.31332	1226.678	5354.12445	9
Nuc	Vitamins	up	-	mono	mono	1499.93474	1065.9548200000002	451.08908	6
Nuc	Vitamins	up	up	UPcore	core	10566.64618	8464.15692	1621.30339	17

## Sheet: seed2
compound_class	seed1	seed2	mono_sign	poly_sign	sign_group	sign_t_group	sum_mono	sum_poly	sum_cont	n
PR	Amino Acids	Alanine, serine, glycine metabolism in plants	down	-	mono	mono	22.05846	48.25446	129.99526	1
PR	Amino Acids	Amino acid racemase	up	up	UPcore	core	211.28034	249.9845	91.76136	1
PR	Amino Acids	Arginine and Ornithine Degradation	-	down	poly	poly	241.12011	44.18734	182.56687	1
PR	Amino Acids	Arginine and Ornithine Degradation	-	up	poly	poly	3.58878	124.74076	6.69093	1
PR	Amino Acids	Arginine and Ornithine Degradation	up	-	mono	mono	1159.35993	228.13832000000002	145.28881	7
PR	Amino Acids	Arginine and Ornithine Degradation	up	up	UPcore	core	886.03809	1483.96015	398.5884	1
PR	Amino Acids	Arginine Biosynthesis extended	up	-	mono	mono	978.26566	383.58913	339.32586	1
PR	Amino Acids	Arginine deiminase and agmatine deiminase pathways in Streptococci	-	up	poly	poly	187.6179	1618.05006	374.69222	1
PR	Amino Acids	Arginine deiminase and agmatine deiminase pathways in Streptococci	down	-	mono	mono	282.42566	883.51012	749.38443	1
PR	Amino Acids	Arginine metabolism and urea cycle in plants	-	up	poly	poly	1327.00603	3246.02397	1800.81668	1
PR	Amino Acids	Aromatic amino acid degradation	-	up	poly	poly	531.6254	2397.63231	528.58366	2
PR	Amino Acids	Aromatic amino acid degradation	down	-	mono	mono	103.07448	233.25438	257.12298	1
PR	Amino Acids	Aromatic amino acid degradation	down	down	DOWNcore	core	3.99593	3.64747	38.2339	1
PR	Amino Acids	Aromatic amino acid degradation	up	up	UPcore	core	134.63712	77.02661	22.94034	1
PR	Amino Acids	Branched chain amino acid degradation regulons	down	-	mono	mono	6.77372	9.72549	63.08593	1
PR	Amino Acids	Branched-Chain Amino Acid Biosynthesis	-	down	poly	poly	2654.32576	820.34879	2440.27865	1
PR	Amino Acids	Branched-Chain Amino Acid Biosynthesis	-	up	poly	poly	368.74502	1273.27922	165.36162	1
PR	Amino Acids	Branched-Chain Amino Acid Biosynthesis	down	-	mono	mono	100.18573	361.60029	435.86646	1
PR	Amino Acids	Chorismate biosynthesis in plants	-	up	poly	poly	310.72308	837.66721	304.91535	1
PR	Amino Acids	Chorismate biosynthesis in Streptococci	-	up	poly	poly	127.4814	403.27242	195.94874	1
PR	Amino Acids	Chorismate biosynthesis in Streptococci	up	-	mono	mono	823.36331	211.90984	243.74111	1
PR	Amino Acids	Chorismate Synthesis	down	-	mono	mono	10.84419	10.36579	130.95111	1
PR	Amino Acids	Cinnamic Acid Degradation	up	-	mono	mono	81.21813	5.29439	4.77924	1
PR	Amino Acids	Common Pathway For Synthesis of Aromatic Compounds (DAHP synthase to chorismate)	up	-	mono	mono	24.12862	2.19588	3.82339	1
PR	Amino Acids	Common Pathway For Synthesis of Aromatic Compounds (DAHP synthase to chorismate)	up	down	monoUP-polyDOWN	mixed	1187.82452	232.01578	725.48825	1
PR	Amino Acids	Creatine and Creatinine Degradation	down	down	DOWNcore	core	331.21618	425.02961	1637.3667599999999	2
PR	Amino Acids	Cysteine Biosynthesis	-	up	poly	poly	248.28093	2142.95139	517.11349	1
PR	Amino Acids	Cysteine Biosynthesis	down	-	mono	mono	120.40178	370.16217	844.01333	2
PR	Amino Acids	Cysteine Biosynthesis	down	down	DOWNcore	core	459.48332	289.32642	1868.68185	1
PR	Amino Acids	Cysteine Biosynthesis	up	-	mono	mono	609.54766	129.57318	264.76976	2
PR	Amino Acids	Cysteine Biosynthesis, MCB 432	-	up	poly	poly	473.87089	1347.2187	520.93688	1
PR	Amino Acids	Cysteine Biosynthesis, MCB 432	down	-	mono	mono	121.93362	573.68244	491.30561	1
PR	Amino Acids	Glutamate dehydrogenases	-	up	poly	poly	521.72675	2738.58666	1078.19597	1
PR	Amino Acids	Glutamate dehydrogenases	up	-	mono	mono	1909.32766	318.54555	296.31272	1
PR	Amino Acids	Glutamine synthetases	-	down	poly	poly	3089.06974	984.22182	4392.11923	1
PR	Amino Acids	Glutamine, Glutamate, Aspartate and Asparagine Biosynthesis	down	-	mono	mono	1804.76929	2283.73037	6173.81895	1
PR	Amino Acids	Glutamine, Glutamate, Aspartate and Asparagine Biosynthesis	up	-	mono	mono	1922.26772	565.79986	395.72086	2
PR	Amino Acids	Glutamine, Glutamate, Aspartate and Asparagine Biosynthesis	up	up	UPcore	core	235.56794000000002	571.99553	70.73271	2
PR	Amino Acids	Glutamine, glutamate, aspartate, asparagine metabolism in plants	down	-	mono	mono	288.77018	854.68331	2165.95041	2
PR	Amino Acids	Glutamine, glutamate, aspartate, asparagine metabolism in plants	up	-	mono	mono	12590.87248	4895.85007	3491.71088	4
PR	Amino Acids	Glycine and Serine Utilization	-	up	poly	poly	523.78988	1467.23202	969.22936	1
PR	Amino Acids	Glycine and Serine Utilization	up	-	mono	mono	29.14199	8.78354	4.77924	1
PR	Amino Acids	Glycine and Serine Utilization	up	up	UPcore	core	284.26833	481.14632	149.11221	1
PR	Amino Acids	Glycine cleavage system	-	up	poly	poly	1575.2519	4173.10977	1543.6936999999998	2
PR	Amino Acids	Glycine cleavage system	up	-	mono	mono	84.32325	5.93802	9.55847	1
PR	Amino Acids	Histidine Biosynthesis in Streptococci	down	-	mono	mono	20.5829	36.26176	75.51195	1
PR	Amino Acids	Histidine Biosynthesis in Streptococci	down	up	monoDOWN-polyUP	mixed	22.10124	253.64264	107.05492	1
PR	Amino Acids	Histidine Degradation	up	-	mono	mono	57.20931	4.66309	4.77924	1
PR	Amino Acids	Histidine Degradation in Streptococci	-	up	poly	poly	432.76283	3497.6000400000003	707.32715	4
PR	Amino Acids	HMG CoA Synthesis	-	up	poly	poly	418.11737	2115.08289	538.1421399999999	2
PR	Amino Acids	HMG CoA Synthesis	down	down	DOWNcore	core	29.80409	28.72282	43.01314	1
PR	Amino Acids	Isoleucine degradation	up	-	mono	mono	24321.833010000002	10097.543520000001	9869.12536	3
PR	Amino Acids	Khodge314 Isoleucine Biosynthesis	-	down	poly	poly	3850.61567	1065.16189	2556.89204	1
PR	Amino Acids	L-2-amino-thiazoline-4-carboxylic acid-Lcysteine conversion	-	down	poly	poly	367.89775	69.92198	203.59552	1
PR	Amino Acids	Leucine Degradation and HMG-CoA Metabolism	-	up	poly	poly	3.10764	76.35731	12.42602	1
PR	Amino Acids	Lysine biosynthesis in Streptococci	-	up	poly	poly	1324.04107	2504.11306	1339.14234	1
PR	Amino Acids	Lysine biosynthesis in Streptococci	down	-	mono	mono	390.19284	786.72689	1155.61962	1
PR	Amino Acids	Lysine degradation	-	up	poly	poly	84.97297	1459.56408	187.3461	2
PR	Amino Acids	Lysine degradation	down	-	mono	mono	34.0262	69.48501	178.74348	1
PR	Amino Acids	Lysine degradation	up	-	mono	mono	4124.95233	181.30213	227.49171	4
PR	Amino Acids	Lysine fermentation	down	-	mono	mono	11.27246	21.69586	84.11458	1
PR	Amino Acids	Lysine fermentation	down	down	DOWNcore	core	107.17627	126.582	407.19103	1
PR	Amino Acids	Lysine fermentation	up	-	mono	mono	15356.75945	2141.04388	4942.68739	2
PR	Amino Acids	Lysine fermentation MCB 432	up	-	mono	mono	7706.93164	3054.00207	3703.90903	1
PR	Amino Acids	Methionine and cysteine metabolism in plants	up	-	mono	mono	1179.69784	429.48571	209.3306	1
PR	Amino Acids	Methionine Biosynthesis	-	up	poly	poly	976.98189	4340.57326	1307.5993700000001	2
PR	Amino Acids	Methionine Degradation	-	up	poly	poly	37.62014	177.31766	15.29356	1
PR	Amino Acids	Methionine in Streptococci	-	up	poly	poly	469.39494	2204.37883	1189.07428	1
PR	Amino Acids	Methionine Salvage	up	-	mono	mono	51.51287	11.65939	9.55847	1
PR	Amino Acids	Phenylalanine and Tyrosine Branches from Chorismate	down	down	DOWNcore	core	120.39301	137.54909	392.85332	1
PR	Amino Acids	Phenylalanine and Tyrosine Branches from Chorismate	up	-	mono	mono	145.21893	63.36866	30.58712	1
PR	Amino Acids	PII Superfamily	-	up	poly	poly	740.53212	1265.67862	721.66486	1
PR	Amino Acids	PII Superfamily	up	-	mono	mono	127.43332	49.9617	31.54297	1
PR	Amino Acids	PII Superfamily	up	down	monoUP-polyDOWN	mixed	1359.29808	217.59787	806.73528	1
PR	Amino Acids	Polyamine Metabolism	-	down	poly	poly	2110.0837	321.02875	1274.14471	1
PR	Amino Acids	Polyamine Metabolism	-	up	poly	poly	705.6786400000001	1114.4082700000001	620.34502	2
PR	Amino Acids	Polyamine Metabolism	down	-	mono	mono	2.8935	8.17624	37.27805	1
PR	Amino Acids	Polyamine Metabolism	up	-	mono	mono	1607.50391	578.91851	366.08959	4
PR	Amino Acids	Proline metabolism in plants	-	up	poly	poly	92.98025	826.35179	272.41654	1
PR	Amino Acids	Proline, 4-hydroxyproline uptake and utilization	down	down	DOWNcore	core	16.78582	21.89718	91.76136	1
PR	Amino Acids	Proline, 4-hydroxyproline uptake and utilization	up	-	mono	mono	510.68048	91.35619	116.61339	2
PR	Amino Acids	Threonine anaerobic catabolism gene cluster	up	up	UPcore	core	147.87157	104.18451	22.94034	1
PR	Amino Acids	Threonine degradation	-	up	poly	poly	589.71353	3149.93201	930.99546	2
PR	Amino Acids	Threonine degradation	down	-	mono	mono	4.99953	16.00516	89.84966	1
PR	Amino Acids	Tryptophan biosynthesis in Streptococci	-	up	poly	poly	105.06193	481.83595	129.99526	1
PR	Amino Acids	Tryptophan biosynthesis in Streptococci	up	up	UPcore	core	195.96221	410.77269	135.73034	1
PR	Amino Acids	Tryptophan catabolism	-	up	poly	poly	182.25776	1390.61605	283.8867	2
PR	Amino Acids	Tryptophan catabolism	up	-	mono	mono	149.84817	35.91777	24.85203	1
PR	Amino Acids	Tryptophan metabolism in plants	up	-	mono	mono	444.60925	232.95173	116.61339	1
PR	Amino Acids	Tryptophan synthesis	up	-	mono	mono	562.14997	25.64298	15.29356	1
PR	Amino Acids	Urea decomposition	down	down	DOWNcore	core	189.9544	198.65187	1099.22462	1
PR	Arabinose Sensor and transport module	An Arabinose Sensor	up	-	mono	mono	21.78587	3.17183	1.91169	1
PR	Autotrophy	PII superfamily	up	down	monoUP-polyDOWN	mixed	1359.29808	217.59787	806.73528	1
PR	Carbohydrates	2-methylcitrate to 2-methylaconitate metabolism cluster	down	-	mono	mono	1.28349	9.38117	4.77924	1
PR	Carbohydrates	Acetoin, butanediol metabolism	-	down	poly	poly	3850.61567	1065.16189	2556.89204	1
PR	Carbohydrates	Acetoin, butanediol metabolism	up	-	mono	mono	148.49244	8.97253	30.58712	1
PR	Carbohydrates	Acetone Butanol Ethanol Synthesis	-	up	poly	poly	22.30584	312.27188	4.77924	1
PR	Carbohydrates	Acetone Butanol Ethanol Synthesis	down	-	mono	mono	11.27246	21.69586	84.11458	1
PR	Carbohydrates	Acetyl-CoA biosynthesis in plants	-	up	poly	poly	184.49849	1751.17938	427.26383	1
PR	Carbohydrates	Acetyl-CoA fermentation to Butyrate	up	-	mono	mono	25681.105949999997	7845.83353	8724.020069999999	2
PR	Carbohydrates	acinetobacter tca	down	-	mono	mono	249.5112	678.66924	746.51689	1
PR	Carbohydrates	acinetobacter tca	up	-	mono	mono	11455.54088	4251.43601	2983.20002	2
PR	Carbohydrates	alpha carboxysome	up	down	monoUP-polyDOWN	mixed	1359.29808	217.59787	806.73528	1
PR	Carbohydrates	beta carboxysome	-	up	poly	poly	740.53212	1265.67862	721.66486	1
PR	Carbohydrates	Beta-Glucoside Metabolism	down	-	mono	mono	0	0.28665	5.73508	1
PR	Carbohydrates	Calvin-Benson cycle	-	down	poly	poly	1251.72691	319.81781	1865.81431	1
PR	Carbohydrates	Calvin-Benson cycle	-	up	poly	poly	1480.24539	4422.48095	2279.6962700000004	2
PR	Carbohydrates	Calvin-Benson-Bassham cycle in plants	-	up	poly	poly	257.54787	1208.80297	508.51087	1
PR	Carbohydrates	Chitin and N-acetylglucosamine utilization	-	up	poly	poly	122.03188	626.9926300000001	196.90458999999998	2
PR	Carbohydrates	Chitin and N-acetylglucosamine utilization	down	-	mono	mono	21.83056	38.47031	154.84729	1
PR	Carbohydrates	Chitin and N-acetylglucosamine utilization	down	down	DOWNcore	core	134.8101	123.57516	738.87011	1
PR	Carbohydrates	Citrate Metabolism KE3	down	down	DOWNcore	core	45.97382	89.11031	566.81756	1
PR	Carbohydrates	Citrate Metabolism KE4	-	down	poly	poly	10401.1057	1461.06	10879.45616	1
PR	Carbohydrates	CO2 uptake, carboxysome	-	up	poly	poly	2.53962	163.2694	5.73508	1
PR	Carbohydrates	D-Galacturonate and D-Glucuronate Utilization	up	-	mono	mono	108.9326	65.87853	28.67542	1
PR	Carbohydrates	Deoxyribose and Deoxynucleoside Catabolism	-	down	poly	poly	690.6033	153.48758	793.35342	1
PR	Carbohydrates	Deoxyribose and Deoxynucleoside Catabolism	-	up	poly	poly	145.23368	866.80133	208.37475	1
PR	Carbohydrates	Deoxyribose and Deoxynucleoside Catabolism	down	-	mono	mono	73.19838	291.87329	179.69933	1
PR	Carbohydrates	Deoxyribose and Deoxynucleoside Catabolism	up	-	mono	mono	1380.63503	86.23679	40.14559	1
PR	Carbohydrates	Deoxyribose and Deoxynucleoside Catabolism	up	up	UPcore	core	304.76751	46.28556	10.51432	1
PR	Carbohydrates	Entner-Doudoroff Pathway	-	down	poly	poly	1136.16983	165.68294	1328.62801	1
PR	Carbohydrates	Entner-Doudoroff Pathway	up	-	mono	mono	344.46893	215.00234	102.27568	1
PR	Carbohydrates	Ethylmalonyl-CoA pathway of C2 assimilation	down	down	DOWNcore	core	107.17627	126.582	407.19103	1
PR	Carbohydrates	Fermentations in Streptococci	-	down	poly	poly	891.8134	463.96222	1380.24378	1
PR	Carbohydrates	Fermentations in Streptococci	up	-	mono	mono	410.42114	139.29533	196.90458	1
PR	Carbohydrates	Fermentations: Mixed acid	up	-	mono	mono	300.05692	117.12883	41.10144	2
PR	Carbohydrates	Fermentations: Mixed acid	up	up	UPcore	core	147.87157	104.18451	22.94034	1
PR	Carbohydrates	Folate-mediated one-carbon metabolism in plants	-	up	poly	poly	1849.46588	5229.86509	2037.8668499999999	4
PR	Carbohydrates	Folate-mediated one-carbon metabolism in plants	up	-	mono	mono	1179.69784	429.48571	209.3306	1
PR	Carbohydrates	Formaldehyde assimilation: Ribulose monophosphate pathway	-	up	poly	poly	827.4123	2485.01038	995.03724	1
PR	Carbohydrates	Fructose utilization	down	-	mono	mono	34.5496	94.65668	164.40577	1
PR	Carbohydrates	Galactose degradation in plants	-	up	poly	poly	632.84696	2209.69856	1154.6637700000001	1
PR	Carbohydrates	Glycerol and Glycerol-3-phosphate Uptake and Utilization	-	down	poly	poly	21.58797	4.12945	24.85203	1
PR	Carbohydrates	Glycerol and Glycerol-3-phosphate Uptake and Utilization	-	up	poly	poly	412.461	989.56685	510.42256	1
PR	Carbohydrates	Glycerol and Glycerol-3-phosphate Uptake and Utilization	down	down	DOWNcore	core	282.67162	112.73139	705.41545	1
PR	Carbohydrates	Glycerol and Glycerol-3-phosphate Uptake and Utilization	up	-	mono	mono	248.11565000000002	183.18068	166.31746	2
PR	Carbohydrates	Glycolate, glyoxylate interconversions	up	-	mono	mono	401.98025	185.68089	109.92246	1
PR	Carbohydrates	Glycolysis and Gluconeogenesis	-	up	poly	poly	546.26127	809.49501	287.7101	1
PR	Carbohydrates	Glycolysis and Gluconeogenesis	down	-	mono	mono	1.74445	19.97328	15.29356	1
PR	Carbohydrates	Glycolysis and Gluconeogenesis in Streptococci	up	down	monoUP-polyDOWN	mixed	2163.60232	204.47556	450.20417	1
PR	Carbohydrates	Glycolysis and Gluconeogenesis, including Archaeal enzymes	down	-	mono	mono	95.78611	471.72049	482.70298	1
PR	Carbohydrates	Glycolysis test	-	up	poly	poly	408.01106	1219.95639	405.27934	1
PR	Carbohydrates	Inositol catabolism	down	-	mono	mono	9.60534	35.88111	24.85203	2
PR	Carbohydrates	Inositol catabolism	down	down	DOWNcore	core	31.50016	28.62449	230.35925	1
PR	Carbohydrates	Isobutyryl-CoA to Propionyl-CoA Module	up	-	mono	mono	7706.93164	3054.00207	3703.90903	1
PR	Carbohydrates	L-Arabinose CS	up	-	mono	mono	21.78587	3.17183	1.91169	1
PR	Carbohydrates	L-Arabinose utilization	down	-	mono	mono	12.26927	49.70905	47.79237	1
PR	Carbohydrates	L-rhamnose utilization	-	down	poly	poly	72.24616	19.08233	97.49644	1
PR	Carbohydrates	L-rhamnose utilization	down	-	mono	mono	45.71688	107.94398	149.11221	1
PR	Carbohydrates	Lactate utilization	up	-	mono	mono	403.72988	48.33679	28.67542	1
PR	Carbohydrates	Lactate utilization temp	up	-	mono	mono	754.86775	600.58804	371.82467	2
PR	Carbohydrates	Lactose utilization	-	up	poly	poly	4.75271	123.01552	14.33771	1
PR	Carbohydrates	Malonate_	up	-	mono	mono	11.62635	10.12547	0.95585	1
PR	Carbohydrates	Maltose and Maltodextrin Utilization	down	-	mono	mono	48.32476	102.4876	136.68619	1
PR	Carbohydrates	Maltose and Maltodextrin Utilization	up	up	UPcore	core	13.54853	20.64391	3.82339	1
PR	Carbohydrates	Mannose Metabolism	-	up	poly	poly	144.0902	828.58269	253.29959	1
PR	Carbohydrates	Methylcitrate cycle	up	-	mono	mono	70.44527	4.4831	21.02864	1
PR	Carbohydrates	Methylglyoxal Metabolism	-	up	poly	poly	206.7147	1519.42627	435.86646	1
PR	Carbohydrates	Methylglyoxal Metabolism	up	-	mono	mono	491.96889	124.28445	139.55373	1
PR	Carbohydrates	Methylglyoxal Metabolism	up	up	UPcore	core	15.7491	52.94888	4.77924	1
PR	Carbohydrates	One-carbon metabolism by tetrahydropterines	-	up	poly	poly	120.91637	356.49288	131.90695	1
PR	Carbohydrates	One-carbon metabolism by tetrahydropterines	up	-	mono	mono	299.49298	149.09615	85.07043	1
PR	Carbohydrates	Pentose phosphate pathway	-	down	poly	poly	349.03708	212.36648	432.99891	1
PR	Carbohydrates	Photorespiration (oxidative C2 cycle)	down	-	mono	mono	22.05846	48.25446	129.99526	1
PR	Carbohydrates	Photorespiration (oxidative C2 cycle)	up	-	mono	mono	5745.62933	870.62714	1245.46929	2
PR	Carbohydrates	Photorespiration (oxidative C2 cycle) in plants	down	-	mono	mono	192.98407	382.96282	1683.24743	1
PR	Carbohydrates	Photorespiration (oxidative C2 cycle) in plants	up	-	mono	mono	472.35453	144.71471	136.68619	1
PR	Carbohydrates	Pyruvate Alanine Serine Interconversions	-	up	poly	poly	500.00623	990.16183	426.30798	1
PR	Carbohydrates	Pyruvate Alanine Serine Interconversions	up	-	mono	mono	541.68161	236.26389	107.05492	1
PR	Carbohydrates	Pyruvate Alanine Serine Interconversions	up	up	UPcore	core	284.26833	481.14632	149.11221	1
PR	Carbohydrates	Pyruvate metabolism I: anaplerotic reactions, PEP	up	-	mono	mono	277.56587	92.58212	192.12535	1
PR	Carbohydrates	Pyruvate metabolism I: anaplerotic reactions, PEP	up	down	monoUP-polyDOWN	mixed	1451.42806	157.73535999999999	843.05749	2
PR	Carbohydrates	Pyruvate metabolism I: anaplerotic reactions, PEP in Mycobacteria	up	-	mono	mono	4961.873890000001	226.10509	159.62653	2
PR	Carbohydrates	Pyruvate metabolism II: acetyl-CoA, acetogenesis from pyruvate	-	down	poly	poly	8970.91214	4090.7138299999997	12711.81581	2
PR	Carbohydrates	Pyruvate metabolism II: acetyl-CoA, acetogenesis from pyruvate	-	up	poly	poly	979.24492	2291.57357	1224.44064	1
PR	Carbohydrates	Pyruvate metabolism II: acetyl-CoA, acetogenesis from pyruvate	up	-	mono	mono	476.80356	68.59372	34.4105	3
PR	Carbohydrates	Rubisco shunt in plants	-	up	poly	poly	468.84817	1068.98235	470.27697	1
PR	Carbohydrates	Serine-glyoxylate cycle	-	up	poly	poly	987.5283	5203.87713	1885.8871	2
PR	Carbohydrates	Serine-glyoxylate cycle	down	-	mono	mono	18.48563	47.02386	152.93559	2
PR	Carbohydrates	Serine-glyoxylate cycle	down	up	monoDOWN-polyUP	mixed	14.74596	346.33942	134.7745	1
PR	Carbohydrates	Serine-glyoxylate cycle	up	-	mono	mono	9910.30608	2491.83837	5143.41535	2
PR	Carbohydrates	Serine-glyoxylate cycle	up	up	UPcore	core	204.61646	137.39076	56.395	2
PR	Carbohydrates	Sucrose utilization Shewanella	-	up	poly	poly	15.49278	53.93283	7.64678	1
PR	Carbohydrates	Sucrose utilization Shewanella	up	-	mono	mono	274.82762	36.50274	24.85203	1
PR	Carbohydrates	Sugar utilization in Thermotogales	-	down	poly	poly	5.20651	0.75329	16.24941	1
PR	Carbohydrates	Sugar utilization in Thermotogales	-	up	poly	poly	220.08616	1118.74271	397.63256	1
PR	Carbohydrates	Sugar utilization in Thermotogales	down	-	mono	mono	46.16932	133.20898	151.0239	2
PR	Carbohydrates	Sugar utilization in Thermotogales	down	down	DOWNcore	core	42.89881	33.388909999999996	190.21365	2
PR	Carbohydrates	TCA cycle in plants	-	up	poly	poly	1814.35414	4575.3692	2334.17958	2
PR	Carbohydrates	TCA cycle in plants	down	-	mono	mono	92.28152	112.78906	333.59077	1
PR	Carbohydrates	Trehalose metabolism in plants	up	-	mono	mono	690.5388	35.34147	8.60263	1
PR	Carbohydrates	Trehalose Biosynthesis	-	up	poly	poly	44.57069	239.44539	62.13009	1
PR	Carbohydrates	Trehalose Biosynthesis	up	-	mono	mono	340.44003	11.32707	4.77924	1
PR	Carbohydrates	Trehalose Uptake and Utilization	-	up	poly	poly	6.11113	39.52558	3.82339	1
PR	Carbohydrates	Xylose utilization	down	down	DOWNcore	core	236.30692	109.30757	766.58969	1
PR	Cell Division and Cell Cycle	Bacterial Cytoskeleton	-	up	poly	poly	1398.29257	4201.71163	1781.6997299999998	6
PR	Cell Division and Cell Cycle	Bacterial Cytoskeleton	up	-	mono	mono	957.64364	198.96352	228.44754999999998	3
PR	Cell Division and Cell Cycle	Bacterial Cytoskeleton	up	down	monoUP-polyDOWN	mixed	186.84129	11.47606	42.05729	1
PR	Cell Division and Cell Cycle	Bacterial Cytoskeleton	up	up	UPcore	core	1135.99962	1299.64684	487.48222	1
PR	Cell Division and Cell Cycle	Control of cell elongation - division cycle in Bacilli	-	up	poly	poly	117.75185	401.9135	143.37712	1
PR	Cell Division and Cell Cycle	Diadenylate cyclase cluster	up	-	mono	mono	932.45659	807.9321	540.05383	1
PR	Cell Division and Cell Cycle	Macromolecular synthesis operon	-	up	poly	poly	1749.51225	4268.84575	2251.9766999999997	2
PR	Cell Division and Cell Cycle	Two cell division clusters relating to chromosome partitioning	-	up	poly	poly	1699.7559899999999	2919.28317	1491.12208	3
PR	Cell Division and Cell Cycle	Two cell division clusters relating to chromosome partitioning	down	-	mono	mono	243.96918	559.69218	909.96681	1
PR	Cell Wall and Capsule	Alginate metabolism	-	up	poly	poly	45.7198	122.42588	2.86754	1
PR	Cell Wall and Capsule	Alginate metabolism	up	-	mono	mono	1643.30722	700.17911	251.38789	7
PR	Cell Wall and Capsule	Biosynthesis of Arabinogalactan in Mycobacteria	-	up	poly	poly	7.69803	77.28326	6.69093	1
PR	Cell Wall and Capsule	Capsular heptose biosynthesis	down	-	mono	mono	304.15200000000004	782.33844	641.37367	2
PR	Cell Wall and Capsule	dTDP-rhamnose synthesis	-	up	poly	poly	638.3459	2115.52952	959.67088	2
PR	Cell Wall and Capsule	KDO2-Lipid A biosynthesis	-	up	poly	poly	589.49932	1308.5703800000001	716.88562	2
PR	Cell Wall and Capsule	KDO2-Lipid A biosynthesis	up	-	mono	mono	19.27971	21.15355	1.91169	1
PR	Cell Wall and Capsule	KDO2-Lipid A biosynthesis	up	down	monoUP-polyDOWN	mixed	229.34996	27.32023	56.395	1
PR	Cell Wall and Capsule	KDO2-Lipid A biosynthesis	up	up	UPcore	core	302.05922	428.96707	225.58001	1
PR	Cell Wall and Capsule	linker unit-arabinogalactan synthesis	-	up	poly	poly	616.13602	2164.2763	800.04435	1
PR	Cell Wall and Capsule	linker unit-arabinogalactan synthesis	up	up	UPcore	core	428.11187	448.87769	212.19814	1
PR	Cell Wall and Capsule	Lipid A biosynthesis in plants	-	up	poly	poly	218.18291	838.48383	305.8712	2
PR	Cell Wall and Capsule	Lipid A modifications	down	-	mono	mono	0	4.76075	4.77924	1
PR	Cell Wall and Capsule	Lipid A modifications	up	-	mono	mono	76.09946	8.05158	0	1
PR	Cell Wall and Capsule	Lipopolysaccharide assembly	-	up	poly	poly	1091.7899	3658.2798700000003	1293.26166	2
PR	Cell Wall and Capsule	Lipopolysaccharide-related cluster in Alphaproteobacteria	down	-	mono	mono	3.41929	8.91153	8.60263	1
PR	Cell Wall and Capsule	Lipopolysaccharide-related cluster in Alphaproteobacteria	up	up	UPcore	core	333.67938	517.36841	239.91772	1
PR	Cell Wall and Capsule	LOS core oligosaccharide biosynthesis	-	down	poly	poly	145.95445	64.67359	246.60865	1
PR	Cell Wall and Capsule	LOS core oligosaccharide biosynthesis	up	-	mono	mono	49.52416	39.77724	6.69093	1
PR	Cell Wall and Capsule	Major Outer Membrane Proteins	up	-	mono	mono	990.10983	16.10615	10.51432	1
PR	Cell Wall and Capsule	Murein Hydrolases	up	-	mono	mono	597.64464	176.06273	171.0967	1
PR	Cell Wall and Capsule	Outer membrane	up	-	mono	mono	8179.1082	142.10118	314.47383	1
PR	Cell Wall and Capsule	Peptidoglycan Biosynthesis	-	down	poly	poly	3089.06974	984.22182	4392.11923	1
PR	Cell Wall and Capsule	Peptidoglycan Biosynthesis	-	up	poly	poly	1190.33138	5435.81995	1894.48972	6
PR	Cell Wall and Capsule	Peptidoglycan Biosynthesis	down	-	mono	mono	192.98407	382.96282	1683.24743	1
PR	Cell Wall and Capsule	Peptidoglycan Biosynthesis	down	down	DOWNcore	core	9.52801	12.89432	36.3222	1
PR	Cell Wall and Capsule	Peptidoglycan Biosynthesis	up	-	mono	mono	1385.5822	734.43297	531.4512	3
PR	Cell Wall and Capsule	Peptidoglycan Biosynthesis	up	up	UPcore	core	211.28034	249.9845	91.76136	1
PR	Cell Wall and Capsule	Peptidoglycan biosynthesis--gjo	-	up	poly	poly	452.77223	794.76679	561.08248	1
PR	Cell Wall and Capsule	Raj MurE	-	up	poly	poly	323.90397	1013.77225	448.29247	1
PR	Cell Wall and Capsule	Rhamnose containing glycans	-	up	poly	poly	37.067139999999995	560.11582	50.659910000000004	2
PR	Cell Wall and Capsule	Serotype determining Capsular polysaccharide biosynthesis in Staphylococcus	-	up	poly	poly	2.0436	58.2926	4.77924	1
PR	Cell Wall and Capsule	Sialic Acid Metabolism	down	down	DOWNcore	core	37.89691	31.0007	246.60865	1
PR	Cell Wall and Capsule	Teichoic and lipoteichoic acids biosynthesis	up	-	mono	mono	26.89918	10.40579	2.86754	1
PR	Cell Wall and Capsule	Teichuronic acid biosynthesis	-	up	poly	poly	643.1725399999999	2378.11669	1175.69241	2
PR	Cell Wall and Capsule	UDP-N-acetylmuramate from Fructose-6-phosphate Biosynthesis	-	up	poly	poly	1009.42854	3049.63497	1213.92632	2
PR	Cell Wall and Capsule	UDP-N-acetylmuramate from Fructose-6-phosphate Biosynthesis	up	-	mono	mono	932.45659	807.9321	540.05383	1
PR	Cell Wall and Capsule	Vibrio Core Oligosaccharide Biosynthesis	up	-	mono	mono	80.32223	7.21895	9.55847	1
PR	Cell Wall and Capsule	Vibrio Polysaccharide (VPS) Biosynthesis	-	up	poly	poly	49.22542	179.25122	37.27805	1
PR	Central metabolism	Cyanobacterial bypass in the TCA	up	-	mono	mono	4880.10119	209.98994	151.0239	1
PR	Central metabolism	EC 6.4.1.- Ligases that form carbon-carbon bonds	-	up	poly	poly	334.42739	1659.9502	399.54425	1
PR	DNA Metabolism	2-phosphoglycolate salvage	up	-	mono	mono	736.4531400000001	267.7509	197.86043	3
PR	DNA Metabolism	CRISPRs	down	-	mono	mono	5.48308	18.22771	22.94034	1
PR	DNA Metabolism	DNA Repair Base Excision	-	up	poly	poly	444.9821	1647.4652099999998	599.31637	2
PR	DNA Metabolism	DNA Repair Base Excision	up	-	mono	mono	188.72387	129.04987	55.43915	1
PR	DNA Metabolism	DNA Repair Base Excision	up	up	UPcore	core	204.69715	259.13968	113.74585	1
PR	DNA Metabolism	DNA repair, bacterial	-	down	poly	poly	383.34254	196.20733	469.32111	2
PR	DNA Metabolism	DNA repair, bacterial	-	up	poly	poly	1176.50889	2155.29344	830.63147	4
PR	DNA Metabolism	DNA repair, bacterial	up	-	mono	mono	113.84222	6.9353	3.82339	1
PR	DNA Metabolism	DNA repair, bacterial	up	up	UPcore	core	525.27816	997.23514	155.80313999999998	4
PR	DNA Metabolism	DNA repair, bacterial MutL-MutS system	-	up	poly	poly	692.22926	2715.5932700000003	933.8629999999999	3
PR	DNA Metabolism	DNA repair, bacterial RecBCD pathway	up	up	UPcore	core	234.81898999999999	175.67941000000002	13.38186	3
PR	DNA Metabolism	DNA repair, bacterial RecFOR pathway	-	up	poly	poly	268.81892	1112.45173	372.78052	1
PR	DNA Metabolism	DNA repair, bacterial UvrD and related helicases	-	up	poly	poly	292.11502	1465.54979	518.06934	1
PR	DNA Metabolism	DNA repair, bacterial UvrD and related helicases	up	-	mono	mono	402.47432	80.15544	86.98212000000001	2
PR	DNA Metabolism	DNA repair, UvrABC system	-	up	poly	poly	890.14423	3164.64494	862.17444	2
PR	DNA Metabolism	DNA repair, UvrABC system	up	-	mono	mono	521.52139	22.73647	0.95585	1
PR	DNA Metabolism	DNA repair, UvrABC system	up	up	UPcore	core	1747.2600400000001	2592.3661199999997	874.60046	2
PR	DNA Metabolism	DNA replication, archaeal	-	up	poly	poly	41.86925	223.82688	66.90932	1
PR	DNA Metabolism	DNA structural proteins, bacterial	-	down	poly	poly	898.55035	130.50112	577.33189	1
PR	DNA Metabolism	DNA structural proteins, bacterial	-	up	poly	poly	572.0492	1815.30032	457.85095	1
PR	DNA Metabolism	DNA structural proteins, bacterial	up	-	mono	mono	317.78569	3.02217	12.42602	1
PR	DNA Metabolism	DNA structural proteins, bacterial	up	down	monoUP-polyDOWN	mixed	4436.00748	267.18192	1258.85115	1
PR	DNA Metabolism	DNA topoisomerases, Type II, ATP-dependent	-	up	poly	poly	952.04519	1786.32588	1027.53605	1
PR	DNA Metabolism	DNA-replication	-	up	poly	poly	2969.9666899999997	9253.08485	3495.53429	9
PR	DNA Metabolism	DNA-replication	down	down	DOWNcore	core	77.94651	37.53769	398.5884	1
PR	DNA Metabolism	DNA-replication	up	up	UPcore	core	554.36274	698.19889	343.14925	1
PR	DNA Metabolism	Plasmid replication	-	up	poly	poly	279.19244	893.55758	545.78892	1
PR	DNA Metabolism	Restriction-Modification System	down	-	mono	mono	6.24078	28.53083	28.67542	1
PR	DNA Metabolism	Restriction-Modification System	up	up	UPcore	core	28.52058	35.16381	0.95585	1
PR	DNA Metabolism	Type I Restriction-Modification	-	up	poly	poly	548.2294099999999	2027.86783	455.93926	2
PR	DNA Metabolism	Type I Restriction-Modification	up	up	UPcore	core	264.28812	287.24287	97.49644	1
PR	DNA Metabolism	YcfH	-	up	poly	poly	125.68289	474.21368	90.80551	1
PR	DNA Metabolism	YcfH	up	up	UPcore	core	304.76751	46.28556	10.51432	1
PR	Dormancy and Sporulation	Persister Cells	up	-	mono	mono	809.47216	24.48071	67.86517	1
PR	Dormancy and Sporulation	Sporulation Cluster	-	up	poly	poly	433.97983	2178.70855	457.85095	1
PR	Dormancy and Sporulation	Sporulation gene orphans	up	-	mono	mono	1333.20366	81.85769	10.51432	1
PR	Fatty Acids and Lipids	Acyclic terpenes utilization	up	-	mono	mono	121.37503	4.77908	0	1
PR	Fatty Acids and Lipids	Archaeal lipids	-	up	poly	poly	55.01057	373.34499	117.56924	1
PR	Fatty Acids and Lipids	archaeal lipids bobik	-	up	poly	poly	3.10764	76.35731	12.42602	1
PR	Fatty Acids and Lipids	Carotenoid biosynthesis	-	up	poly	poly	84.5288	852.69307	157.71483	3
PR	Fatty Acids and Lipids	CDP-diacylglycerol biosynthesis in plants	-	up	poly	poly	143.01417	262.26285	120.43678	1
PR	Fatty Acids and Lipids	CDP-diacylglycerol biosynthesis in plants	up	-	mono	mono	200.21404	40.5872	21.02864	1
PR	Fatty Acids and Lipids	CDP-diacylglycerol biosynthesis in plants	up	up	UPcore	core	299.07093	647.75288	212.19814	1
PR	Fatty Acids and Lipids	Fatty Acid Biosynthesis FASII	up	-	mono	mono	10.42256	8.17357	0	1
PR	Fatty Acids and Lipids	Fatty acid biosynthesis in plants (plastidial)	-	up	poly	poly	1052.06125	1872.83931	1179.51581	1
PR	Fatty Acids and Lipids	Fatty acid degradation regulons	up	-	mono	mono	16989.50038	5481.0261900000005	8776.59167	2
PR	Fatty Acids and Lipids	Glycerolipid and Glycerophospholipid Metabolism in Bacteria	-	down	poly	poly	5895.7561	2603.99349	7259.66171	1
PR	Fatty Acids and Lipids	Glycerolipid and Glycerophospholipid Metabolism in Bacteria	-	up	poly	poly	876.84944	3156.53366	1226.35234	3
PR	Fatty Acids and Lipids	Glycerolipid and Glycerophospholipid Metabolism in Bacteria	up	-	mono	mono	489.17134	118.39709	53.52746	2
PR	Fatty Acids and Lipids	Isoprenoid Biosynthesis	-	up	poly	poly	533.41641	2073.80607	1024.66851	2
PR	Fatty Acids and Lipids	Isoprenoid biosynthesis in plants, mevalonate branch	-	up	poly	poly	65.28697	397.99936	110.87831	1
PR	Fatty Acids and Lipids	Isoprenoinds for Quinones	-	up	poly	poly	47.72836	460.57873	114.7017	2
PR	Fatty Acids and Lipids	Phosphatidylethanolamine biosynthesis in plants	up	-	mono	mono	510.33083	330.33126	334.54662	1
PR	Fatty Acids and Lipids	Phospholipid and Fatty acid biosynthesis related cluster	up	-	mono	mono	178.79242	12.12303	13.38186	1
PR	Fatty Acids and Lipids	Polyhydroxybutyrate metabolism	-	down	poly	poly	3852.46607	19.85095	216.02153	1
PR	Fatty Acids and Lipids	Polyhydroxybutyrate metabolism	down	-	mono	mono	11.27246	21.69586	84.11458	1
PR	Fatty Acids and Lipids	Polyhydroxybutyrate metabolism	down	down	DOWNcore	core	158.8228	170.85399999999998	936.73054	2
PR	Fatty Acids and Lipids	Polyhydroxybutyrate metabolism	up	-	mono	mono	25889.35106	7886.4083900000005	8742.18117	4
PR	Fatty Acids and Lipids	Sphingolipid biosynthesis	-	up	poly	poly	81.16095	361.42763	90.80551	1
PR	Fatty Acids and Lipids	Triacylglycerol metabolism	-	down	poly	poly	16.54034	11.53706	37.27805	1
PR	General Stress Response and Stationary Phase Response	RpoS Regulators SG1	up	-	mono	mono	2286.13276	162.03447	214.10984000000002	2
PR	Iron acquisition and metabolism	Campylobacter Iron Metabolism	-	down	poly	poly	1628.51343	445.4892	2024.48499	1
PR	Iron acquisition and metabolism	Campylobacter Iron Metabolism	down	down	DOWNcore	core	158.68864	174.16649	1236.86666	1
PR	Iron acquisition and metabolism	Hemin transport system	-	down	poly	poly	172.6155	58.74424	346.01679	1
PR	Iron acquisition and metabolism	Hemin transport system	-	up	poly	poly	6.24556	134.10594	16.24941	1
PR	Iron acquisition and metabolism	Hemin transport system	down	-	mono	mono	348.16875	1180.08447	1294.21751	1
PR	Iron acquisition and metabolism	Iron acquisition in Vibrio	-	up	poly	poly	133.17123	1167.68215	359.39866	1
PR	Iron acquisition and metabolism	Iron acquisition in Vibrio	down	-	mono	mono	11533.65385	11907.05892	43010.26963	1
PR	Iron acquisition and metabolism	Iron acquisition in Vibrio	up	-	mono	mono	2933.97112	771.50635	688.21019	3
PR	Iron acquisition and metabolism	Siderophore Pyoverdine	down	-	mono	mono	0	0.12199	7.64678	1
PR	Membrane Transport	ABC transporter branched-chain amino acid (TC 3.A.1.4.1)	-	down	poly	poly	2088.44951	442.58168	1762.58278	1
PR	Membrane Transport	ABC transporter branched-chain amino acid (TC 3.A.1.4.1)	up	down	monoUP-polyDOWN	mixed	1929.21847	155.93779	584.97867	1
PR	Membrane Transport	ABC transporter dipeptide (TC 3.A.1.5.2)	-	down	poly	poly	1167.03697	416.09408	1750.15676	1
PR	Membrane Transport	ABC transporter dipeptide (TC 3.A.1.5.2)	down	-	mono	mono	109.90444	188.40641	242.78526	1
PR	Membrane Transport	ABC transporter of unknown substrate X	-	down	poly	poly	13.969100000000001	4.19645	84.11456999999999	2
PR	Membrane Transport	ABC transporter of unknown substrate X	down	-	mono	mono	0	0.79596	8.60263	1
PR	Membrane Transport	ABC transporter oligopeptide (TC 3.A.1.5.1)	down	-	mono	mono	133.70421	434.80943	525.71612	2
PR	Membrane Transport	ABC transporter oligopeptide (TC 3.A.1.5.1)	down	down	DOWNcore	core	310.41818	331.49387	1023.71266	1
PR	Membrane Transport	Alkanesulfonate assimilation	down	-	mono	mono	68.52884999999999	85.59615	290.57764	3
PR	Membrane Transport	Ammonia assimilation	-	down	poly	poly	1671.49226	918.60528	2240.50652	1
PR	Membrane Transport	Arginine and Ornithine Degradation	-	down	poly	poly	241.12011	44.18734	182.56687	1
PR	Membrane Transport	Arginine and Ornithine Degradation	up	-	mono	mono	454.98064999999997	101.78131	45.88068	2
PR	Membrane Transport	Bacterial Chemotaxis	down	down	DOWNcore	core	42.96706	38.06966	317.34137	1
PR	Membrane Transport	Benzoate transport and degradation cluster	down	down	DOWNcore	core	20.47821	25.46533	485.57053	1
PR	Membrane Transport	Campylobacter Iron Metabolism	-	down	poly	poly	1628.51343	445.4892	2024.48499	1
PR	Membrane Transport	CbiZ Main	-	up	poly	poly	37.19446	552.0995800000001	66.90932	3
PR	Membrane Transport	CBSS-195102.1.peg.963	up	-	mono	mono	1041.23198	256.77081	245.65281	1
PR	Membrane Transport	Chitin and N-acetylglucosamine utilization	-	up	poly	poly	4.23942	38.23265	0.95585	1
PR	Membrane Transport	Chitin and N-acetylglucosamine utilization	down	down	DOWNcore	core	134.8101	123.57516	738.87011	1
PR	Membrane Transport	Choline and Betaine Uptake and Betaine Biosynthesis	down	down	DOWNcore	core	581.38299	512.64999	4659.75653	1
PR	Membrane Transport	Choline and Betaine Uptake and Betaine Biosynthesis	up	-	mono	mono	241.98793	30.49839	1.91169	1
PR	Membrane Transport	Copper homeostasis	up	-	mono	mono	102.61849	33.38657	5.73508	1
PR	Membrane Transport	Cysteine Biosynthesis	up	-	mono	mono	77.83071	10.86343	11.47017	1
PR	Membrane Transport	Cysteine Biosynthesis, MCB 432	-	up	poly	poly	473.87089	1347.2187	520.93688	1
PR	Membrane Transport	Deoxyribose and Deoxynucleoside Catabolism	-	down	poly	poly	690.6033	153.48758	793.35342	1
PR	Membrane Transport	ECF class transporters	down	-	mono	mono	17.40086	67.836429999999993	55.43915	1
PR	Membrane Transport	FOL Commensurate regulon activation	up	-	mono	mono	582.13886	170.08871	91.76136	1
PR	Membrane Transport	Folate Biosynthesis	-	up	poly	poly	423.24617	2132.77228	516.15765	1
PR	Membrane Transport	Galactose-inducible PTS	down	-	mono	mono	34.5496	94.65668	164.40577	1
PR	Membrane Transport	Glycerol and Glycerol-3-phosphate Uptake and Utilization	down	down	DOWNcore	core	282.67162	112.73139	705.41545	1
PR	Membrane Transport	Hemin transport system	-	down	poly	poly	172.6155	58.74424	346.01679	1
PR	Membrane Transport	Hydantoin metabolism	down	-	mono	mono	78.16794	154.49819	512.33426	1
PR	Membrane Transport	Inositol catabolism	down	-	mono	mono	3.97536	24.20039	19.11695	1
PR	Membrane Transport	Inositol catabolism	down	down	DOWNcore	core	31.50016	28.62449	230.35925	1
PR	Membrane Transport	Iron acquisition in Vibrio	-	up	poly	poly	133.17123	1167.68215	359.39866	1
PR	Membrane Transport	Iron acquisition in Vibrio	up	-	mono	mono	46.1034	13.90727	1.91169	1
PR	Membrane Transport	KDO2-Lipid A biosynthesis	up	down	monoUP-polyDOWN	mixed	229.34996	27.32023	56.395	1
PR	Membrane Transport	L-rhamnose utilization	-	down	poly	poly	72.24616	19.08233	97.49644	1
PR	Membrane Transport	Lactate utilization	up	-	mono	mono	403.72988	48.33679	28.67542	1
PR	Membrane Transport	Lipopolysaccharide assembly	-	up	poly	poly	371.11664	819.00984	318.29722	1
PR	Membrane Transport	Lipopolysaccharide-related cluster in Alphaproteobacteria	up	up	UPcore	core	333.67938	517.36841	239.91772	1
PR	Membrane Transport	Lysine degradation	up	-	mono	mono	84.76997	33.43524	16.24941	1
PR	Membrane Transport	Malonate_	up	-	mono	mono	11.62635	10.12547	0.95585	1
PR	Membrane Transport	Maltose and Maltodextrin Utilization	down	-	mono	mono	48.32476	102.4876	136.68619	1
PR	Membrane Transport	Methionine Biosynthesis	-	up	poly	poly	119.44048	455.69065	160.58238	1
PR	Membrane Transport	Na(+) H(+) antiporter	-	up	poly	poly	208.58784	983.04386	427.26383	1
PR	Membrane Transport	Na(+) H(+) antiporter	up	up	UPcore	core	323.77973	251.23643	83.15873	1
PR	Membrane Transport	NAD regulation	up	up	UPcore	core	174.91207	273.49559	25.80788	1
PR	Membrane Transport	Novel non-oxidative pathway of Uracil catabolism	up	-	mono	mono	37.27831	4.86141	0.95585	1
PR	Membrane Transport	P uptake (cyanobacteria)	down	-	mono	mono	260.13541	666.50755	969.22936	1
PR	Membrane Transport	Phosphate metabolism	-	up	poly	poly	376.16739	1402.14446	589.75791	3
PR	Membrane Transport	Phosphate metabolism	up	down	monoUP-polyDOWN	mixed	1079.1634	92.59545	250.43204	1
PR	Membrane Transport	Phosphate metabolism	up	up	UPcore	core	811.1198	1170.79664	407.19103	1
PR	Membrane Transport	Polyamine Metabolism	-	down	poly	poly	2110.0837	321.02875	1274.14471	1
PR	Membrane Transport	Polyamine Metabolism	up	-	mono	mono	566.27193	322.1477	120.43678	3
PR	Membrane Transport	Polyhydroxybutyrate metabolism	up	-	mono	mono	208.24511	40.57486	18.1611	2
PR	Membrane Transport	Proton-dependent Peptide Transporters	-	up	poly	poly	87.57244	333.61309	29.63127	1
PR	Membrane Transport	Purine Utilization	down	down	DOWNcore	core	113.34051	122.93086	431.08722	1
PR	Membrane Transport	Pyrimidine utilization	-	down	poly	poly	327.5436	118.45543	519.98104	2
PR	Membrane Transport	Pyruvate metabolism II: acetyl-CoA, acetogenesis from pyruvate	-	down	poly	poly	3075.15604	1486.72034	5452.1541	1
PR	Membrane Transport	Queuosine-Archaeosine Biosynthesis	-	up	poly	poly	27.30246	233.63136	53.52746	1
PR	Membrane Transport	Queuosine-Archaeosine Biosynthesis	up	up	UPcore	core	895.10447	1393.18128	302.04781	1
PR	Membrane Transport	Sialic Acid Metabolism	down	down	DOWNcore	core	37.89691	31.0007	246.60865	1
PR	Membrane Transport	Sodium Hydrogen Antiporter	up	-	mono	mono	89.132320000000007	23.69409	8.60263	1
PR	Membrane Transport	Sugar utilization in Thermotogales	-	down	poly	poly	5.20651	0.75329	16.24941	1
PR	Membrane Transport	Sugar utilization in Thermotogales	down	-	mono	mono	46.16932	133.20898	151.0239	2
PR	Membrane Transport	Sugar utilization in Thermotogales	down	down	DOWNcore	core	42.89881	33.388909999999996	190.21365	2
PR	Membrane Transport	T6SS BR	up	-	mono	mono	4073.33462	1179.39387	860.26274	1
PR	Membrane Transport	Taurine Utilization	down	-	mono	mono	15.67611	42.42243	30.58712	1
PR	Membrane Transport	Ton and Tol transport systems	-	down	poly	poly	1608.06108	364.93443	2280.6521199999997	2
PR	Membrane Transport	Ton and Tol transport systems	-	up	poly	poly	6.24556	134.10594	16.24941	1
PR	Membrane Transport	Ton and Tol transport systems	down	-	mono	mono	12429.06767	13963.974849999999	46429.33612	7
PR	Membrane Transport	Ton and Tol transport systems	down	down	DOWNcore	core	592.17598	497.46112	2015.8823699999998	2
PR	Membrane Transport	Ton and Tol transport systems	up	-	mono	mono	4404.11997	1030.89136	816.2937499999999	3
PR	Membrane Transport	Ton and Tol transport systems	up	up	UPcore	core	190.82232	347.58302	70.73271	1
PR	Membrane Transport	Transport of Nickel and Cobalt	down	-	mono	mono	2.16794	9.32584	41.10144	1
PR	Membrane Transport	Transport of Zinc	up	-	mono	mono	674.34274	130.3818	59.26254	4
PR	Membrane Transport	Twin-arginine translocation system	-	down	poly	poly	142.13153	52.14092	185.43441	1
PR	Membrane Transport	Twin-arginine translocation system	-	up	poly	poly	253.53989	546.02723	180.65518	1
PR	Membrane Transport	Twin-arginine translocation system	up	-	mono	mono	557.81541	244.62978	314.47383	1
PR	Membrane Transport	Type III secretion system orphans	up	-	mono	mono	219.87745	15.52052	28.67542	1
PR	Membrane Transport	Type IV pilus	up	-	mono	mono	15622.62346	1733.12438	964.4501	17
PR	Membrane Transport	Type IV pilus	up	down	monoUP-polyDOWN	mixed	2566.83669	58.55325	67.86517	1
PR	Membrane Transport	Type VI secretion systems	up	-	mono	mono	289.04535	25.24934	21.98449	1
PR	Membrane Transport	Uptake of selenate and selenite	down	-	mono	mono	11.99033	50.532	34.41051	1
PR	Membrane Transport	Urea decomposition	down	down	DOWNcore	core	189.9544	198.65187	1099.22462	1
PR	Membrane Transport	Widespread colonization island	down	-	mono	mono	7.81814	20.58292	21.98449	1
PR	Membrane Transport	Widespread colonization island	down	down	DOWNcore	core	15.30203	23.74542	92.71721	1
PR	Membrane Transport	Widespread colonization island	up	-	mono	mono	4412.71246	194.80207000000001	157.71483	8
PR	Membrane Transport	Xylose utilization	down	down	DOWNcore	core	236.30692	109.30757	766.58969	1
PR	Metabolism of Aromatic Compounds	Anaerobic Aromatic Degredation (benzoate)	-	up	poly	poly	105.06193	481.83595	129.99526	1
PR	Metabolism of Aromatic Compounds	Anaerobic Aromatic Degredation (benzoate)	down	-	mono	mono	22.13338	35.73378	158.67068	1
PR	Metabolism of Aromatic Compounds	Anaerobic Aromatic Degredation (benzoate)	down	up	monoDOWN-polyUP	mixed	69.67624	378.4364	177.78763	1
PR	Metabolism of Aromatic Compounds	Anaerobic Aromatic Degredation (benzoate)	up	-	mono	mono	4564.70902	1884.51869	998.86063	1
PR	Metabolism of Aromatic Compounds	Benzoate catabolism	-	up	poly	poly	152.26982	263.41079	129.99526	1
PR	Metabolism of Aromatic Compounds	Benzoate catabolism	up	-	mono	mono	9282.56874	2427.02412	5072.68264	1
PR	Metabolism of Aromatic Compounds	Benzoate degradation	up	-	mono	mono	97.12035	22.8768	4.77924	1
PR	Metabolism of Aromatic Compounds	Benzoate transport and degradation cluster	-	up	poly	poly	83.68998	455.13269	138.59789	1
PR	Metabolism of Aromatic Compounds	Benzoate transport and degradation cluster	down	down	DOWNcore	core	87.37388	123.47250000000001	1392.6698000000001	3
PR	Metabolism of Aromatic Compounds	Benzoate transport and degradation cluster	up	-	mono	mono	823.36331	211.90984	243.74111	1
PR	Metabolism of Aromatic Compounds	Catechol branch of beta-ketoadipate pathway	down	-	mono	mono	32.53099	269.82412	108.01077	1
PR	Metabolism of Aromatic Compounds	Catechol branch of beta-ketoadipate pathway	up	-	mono	mono	326.13807	63.00235	73.60026	1
PR	Metabolism of Aromatic Compounds	Central meta-cleavage pathway of aromatic compound degradation	-	up	poly	poly	160.10547	604.37782	347.92849	1
PR	Metabolism of Aromatic Compounds	Central meta-cleavage pathway of aromatic compound degradation	down	-	mono	mono	118.23248	268.98883	464.54188999999997	2
PR	Metabolism of Aromatic Compounds	Central meta-cleavage pathway of aromatic compound degradation	up	-	mono	mono	149.84817	35.91777	24.85203	1
PR	Metabolism of Aromatic Compounds	Gentisate degradation	down	-	mono	mono	16.71036	66.02152	86.02627	1
PR	Metabolism of Aromatic Compounds	Homogentisate pathway of aromatic compound degradation	-	up	poly	poly	623.51905	2468.54058	596.44883	2
PR	Metabolism of Aromatic Compounds	N-heterocyclic aromatic compound degradation	-	down	poly	poly	567.88303	478.49546	1714.7904	1
PR	Metabolism of Aromatic Compounds	N-heterocyclic aromatic compound degradation	down	down	DOWNcore	core	261.99545	190.93561	656.66723	1
PR	Metabolism of Aromatic Compounds	n-Phenylalkanoic acid degradation	up	-	mono	mono	25681.105949999997	7845.83353	8724.020069999999	2
PR	Metabolism of Aromatic Compounds	Phenol hydroxylase	down	-	mono	mono	0.70657	2.5862	19.11695	1
PR	Metabolism of Aromatic Compounds	Phenylpropanoid compound degradation	up	-	mono	mono	81.21813	5.29439	4.77924	1
PR	Metabolism of Aromatic Compounds	Protocatechuate branch of beta-ketoadipate pathway	up	-	mono	mono	103.76233	9.65882	2.86754	1
PR	Metabolism of Aromatic Compounds	Quinate degradation	down	-	mono	mono	10.84419	10.36579	130.95111	1
PR	Metabolism of Aromatic Compounds	Salicylate and gentisate catabolism	-	up	poly	poly	257.99275	1283.08572	470.27696	2
PR	Metabolism of Aromatic Compounds	Salicylate and gentisate catabolism	down	up	monoDOWN-polyUP	mixed	10.95606	300.78415	38.2339	1
PR	Metabolite processes	RidA family in 981 representative prokaryotes	-	up	poly	poly	1363.5861	3003.43343	1375.46455	3
PR	Metabolite processes	RidA proteins copy with new groups	-	down	poly	poly	367.89775	69.92198	203.59552	1
PR	Metabolite processes	RidA proteins copy with new groups	-	up	poly	poly	1327.00603	3246.02397	1800.81668	1
PR	Metabolite processes	RidA proteins copy with new groups	up	-	mono	mono	531.64481	190.61763	296.31272	1
PR	Metabolite processes	RidA proteins copy with new groups	up	up	UPcore	core	702.15101	708.11869	257.12298	1
PR	Metabolite processes	RidA1 subgroup	up	-	mono	mono	1035.16255	790.20704	463.58603	2
PR	Metabolite processes	RidA2 subgroup (YoaB-like)	up	-	mono	mono	541.68161	236.26389	107.05492	1
PR	Metabolite processes	RidA5 subgroup	-	up	poly	poly	218.18854	1315.92066	212.19814	1
PR	Metabolite processes	TN RidA: all subgroups, 981 genomes carbamoyl-P	up	-	mono	mono	978.26566	383.58913	339.32586	1
PR	Miscellaneous	At1g54520	up	-	mono	mono	248.59215	68.3644	22.94034	2
PR	Miscellaneous	At1g69340 At2g40600	up	-	mono	mono	1393.11289	134.1386	49.70406	3
PR	Miscellaneous	At1g69340 At2g40600	up	down	monoUP-polyDOWN	mixed	78.73775	0	1.91169	1
PR	Miscellaneous	At2g33980 At1g28960	-	up	poly	poly	163.87358	235.52626	122.34848	1
PR	Miscellaneous	At2g33980 At1g28960	up	up	UPcore	core	415.83274	751.83272	170.14085	1
PR	Miscellaneous	At5g04520 AT1G06240	-	up	poly	poly	996.61835	1866.201	1106.8714	1
PR	Miscellaneous	At5g04520 AT1G06240	up	-	mono	mono	2424.60745	200.70743000000002	314.47383	2
PR	Miscellaneous	Bacterial Luciferases	-	up	poly	poly	81.16095	361.42763	90.80551	1
PR	Miscellaneous	Broadly distributed proteins not in subsystems	up	up	UPcore	core	481.3177	150.6124	2.86754	1
PR	Miscellaneous	COG0277	-	up	poly	poly	254.11491	1088.53064	463.58603	1
PR	Miscellaneous	COG0523-Histidine	-	up	poly	poly	432.76283	3497.6000400000003	707.32715	4
PR	Miscellaneous	COG1836	-	up	poly	poly	31.44387	332.08717	73.60026	1
PR	Miscellaneous	COG1836	up	-	mono	mono	510.33083	330.33126	334.54662	1
PR	Miscellaneous	COG2016	-	down	poly	poly	0.43359	0	2.86754	1
PR	Miscellaneous	COG2016	up	-	mono	mono	974.36178	709.85759	492.26146	1
PR	Miscellaneous	COG2363	up	-	mono	mono	5272.69103	118.84741	35.36636	2
PR	Miscellaneous	Competence or DNA damage-inducible protein CinA and related protein families	up	-	mono	mono	528.83763	138.31405	179.69933	2
PR	Miscellaneous	EC 2.7.1.- Phosphotransferases with an alcohol group as acceptor	-	up	poly	poly	76.71563	276.5851	123.30433	1
PR	Miscellaneous	EC 4. 1. 1.- Carboxy-lyases	-	up	poly	poly	792.50287	1460.6360200000001	686.29849	3
PR	Miscellaneous	EC 4. 1. 1.- Carboxy-lyases	down	-	mono	mono	34.0262	69.48501	178.74348	1
PR	Miscellaneous	EC 4. 1. 1.- Carboxy-lyases	up	-	mono	mono	277.56587	92.58212	192.12535	1
PR	Miscellaneous	EC 4. 1. 1.- Carboxy-lyases	up	down	monoUP-polyDOWN	mixed	1451.42806	157.73535999999999	843.05749	2
PR	Miscellaneous	EC 4.1.2.- Aldehyde-lyases	down	-	mono	mono	78.82836	303.55401	185.43441	2
PR	Miscellaneous	EC 4.1.2.- Aldehyde-lyases	up	-	mono	mono	168.61409	19.86662	7.64678	1
PR	Miscellaneous	EC 4.1.3.- Oxo-acid-lyases	-	down	poly	poly	10401.1057	1461.06	10879.45616	1
PR	Miscellaneous	EC 4.1.3.- Oxo-acid-lyases	-	up	poly	poly	58.7495	477.82849	148.15636	1
PR	Miscellaneous	EC 4.1.3.- Oxo-acid-lyases	up	up	UPcore	core	195.96221	410.77269	135.73034	1
PR	Miscellaneous	EC 6.3.4.- Ligases that form carbon-nitrogen bonds	-	up	poly	poly	1313.3577	3339.3687	1742.5099800000003	2
PR	Miscellaneous	IojapClusters	-	down	poly	poly	818.21621	323.48996	761.81045	1
PR	Miscellaneous	IojapClusters	-	up	poly	poly	1278.06914	2230.56147	1044.7413000000001	5
PR	Miscellaneous	IojapClusters	up	-	mono	mono	152.24931	13.35196	0	1
PR	Miscellaneous	Metabolite repair	-	up	poly	poly	237.19094	714.13771	259.03467	2
PR	Miscellaneous	Metabolite repair	down	-	mono	mono	4.46605	11.39407	18.1611	1
PR	Miscellaneous	Metabolite repair	up	-	mono	mono	6391.7432100000005	486.6617	346.01679	4
PR	Miscellaneous	Metabolite repair	up	down	monoUP-polyDOWN	mixed	1140.86832	62.56537	238.00603	1
PR	Miscellaneous	Metabolite repair	up	up	UPcore	core	143.09351	383.18248	45.88068	1
PR	Miscellaneous	Muconate lactonizing enzyme family	-	up	poly	poly	152.26982	263.41079	129.99526	1
PR	Miscellaneous	Omega-amidase KE	up	-	mono	mono	51.51287	11.65939	9.55847	1
PR	Miscellaneous	Omega-amidase KE2	down	-	mono	mono	390.19284	786.72689	1155.61962	1
PR	Miscellaneous	Omega-amidase KE2	up	-	mono	mono	145.21893	63.36866	30.58712	1
PR	Miscellaneous	Single-Rhodanese-domain proteins	-	down	poly	poly	21.58797	4.12945	24.85203	1
PR	Miscellaneous	Synechocystis experimental	-	down	poly	poly	16.54034	11.53706	37.27805	1
PR	Miscellaneous	YebC	-	up	poly	poly	761.10268	1528.15881	636.59443	1
PR	Miscellaneous	YgfZ-Fe-S	-	up	poly	poly	1603.6254099999999	3755.64177	1686.11498	4
PR	Miscellaneous	YgfZ-Fe-S	down	-	mono	mono	249.5112	678.66924	746.51689	1
PR	Miscellaneous	YgfZ-Fe-S	up	-	mono	mono	10553.48519	3336.0979	2091.39431	4
PR	Miscellaneous	YgfZ-Fe-S	up	up	UPcore	core	199.13583	407.39521	69.77687	1
PR	Mitochondrial electron transport system in plants	Respiratory complex IV (terminal cytochrome c oxidase) in plants	up	-	mono	mono	907.68064	482.14026	514.24595	1
PR	Motility and Chemotaxis	Bacterial Chemotaxis	-	down	poly	poly	2371.90744	692.44952	3464.94716	4
PR	Motility and Chemotaxis	Bacterial Chemotaxis	down	down	DOWNcore	core	80.0515	56.52069	467.40943	2
PR	Motility and Chemotaxis	Bacterial Chemotaxis	up	-	mono	mono	5382.14578	563.97663	881.29138	7
PR	Motility and Chemotaxis	Bacterial Chemotaxis	up	down	monoUP-polyDOWN	mixed	2114.45245	58.79424	161.53822	2
PR	Motility and Chemotaxis	Bacterial motility:Gliding	-	up	poly	poly	105.53858000000001	823.18196	201.68382	3
PR	Motility and Chemotaxis	Bacterial motility:Gliding	up	-	mono	mono	6840.39997	838.13419	483.65883	10
PR	Motility and Chemotaxis	Flagellar motility	-	down	poly	poly	486.04697	81.48571	925.26037	1
PR	Motility and Chemotaxis	Flagellar motility	up	-	mono	mono	2617.5655	131.02644	138.59789	2
PR	Motility and Chemotaxis	Flagellum	-	down	poly	poly	9426.79141	1483.52088	9279.36746	17
PR	Motility and Chemotaxis	Flagellum	down	-	mono	mono	0	3.18683	54.48331	1
PR	Motility and Chemotaxis	Flagellum	down	down	DOWNcore	core	47.02167	10.82343	261.90221	1
PR	Motility and Chemotaxis	Flagellum	up	-	mono	mono	1000.82092	88.30767999999999	227.49168	7
PR	Motility and Chemotaxis	Flagellum	up	down	monoUP-polyDOWN	mixed	2067.43174	60.23682	233.22678	4
PR	Motility and Chemotaxis	Flagellum in Campylobacter	-	down	poly	poly	143.83748	55.04377	371.82467	1
PR	Motility and Chemotaxis	Flagellum in Campylobacter	down	down	DOWNcore	core	332.68611	97.64752	677.69587	1
PR	Nitrogen Metabolism	Ammonia assimilation	-	down	poly	poly	4760.562	1902.8271	6632.62575	2
PR	Nitrogen Metabolism	Ammonia assimilation	down	-	mono	mono	1997.75336	2666.6931900000004	7857.06638	2
PR	Nitrogen Metabolism	Ammonia assimilation	up	-	mono	mono	1013.5789100000001	325.02855	347.92849	3
PR	Nitrogen Metabolism	Ammonia assimilation	up	down	monoUP-polyDOWN	mixed	1359.29808	217.59787	806.73528	1
PR	Nitrogen Metabolism	Denitrification	-	up	poly	poly	3.04813	44.42699	1.91169	1
PR	Nitrogen Metabolism	Denitrification	down	-	mono	mono	1.86161	14.26092	26.76373	1
PR	Nitrogen Metabolism	Nitrate and nitrite ammonification	down	-	mono	mono	44.7344	181.74276	387.11823	1
PR	Nitrogen Metabolism	Nitric oxide synthase	down	down	DOWNcore	core	73.89578	188.83572	726.44409	1
PR	Nitrogen Metabolism	Nitrosative stress	up	-	mono	mono	60.97298	27.40889	1.9117	2
PR	Nucleosides and Nucleotides	Adenosyl nucleosidases	-	up	poly	poly	145.23368	866.80133	208.37475	1
PR	Nucleosides and Nucleotides	De Novo Purine Biosynthesis	-	up	poly	poly	1052.10818	2862.21086	1658.3954	2
PR	Nucleosides and Nucleotides	De Novo Pyrimidine Synthesis	up	up	UPcore	core	702.15101	708.11869	257.12298	1
PR	Nucleosides and Nucleotides	Hydantoin metabolism	-	down	poly	poly	367.89775	69.92198	203.59552	1
PR	Nucleosides and Nucleotides	Hydantoin metabolism	down	-	mono	mono	82.63399	165.89226	530.49536	2
PR	Nucleosides and Nucleotides	Hydantoin metabolism	down	down	DOWNcore	core	331.21618	425.02961	1637.3667599999999	2
PR	Nucleosides and Nucleotides	Novel non-oxidative pathway of Uracil catabolism	-	down	poly	poly	811.38031	168.3228	595.49299	2
PR	Nucleosides and Nucleotides	Novel non-oxidative pathway of Uracil catabolism	-	up	poly	poly	461.9135	924.02264	533.3629	1
PR	Nucleosides and Nucleotides	Novel non-oxidative pathway of Uracil catabolism	up	-	mono	mono	37.27831	4.86141	0.95585	1
PR	Nucleosides and Nucleotides	Purine conversions	-	up	poly	poly	1028.08884	3520.46151	832.5431600000001	5
PR	Nucleosides and Nucleotides	Purine conversions	up	-	mono	mono	362.61287	218.01785	63.085939999999994	3
PR	Nucleosides and Nucleotides	Purine de novo biosynthesis in plants	-	up	poly	poly	2262.31518	6380.51814	3068.27046	5
PR	Nucleosides and Nucleotides	Purine de novo biosynthesis in plants	down	up	monoDOWN-polyUP	mixed	111.59074	1178.15159	447.33663	1
PR	Nucleosides and Nucleotides	Purine Utilization	down	down	DOWNcore	core	113.34051	122.93086	431.08722	1
PR	Nucleosides and Nucleotides	Purine Utilization	up	down	monoUP-polyDOWN	mixed	1294.81668	20.69591	259.99052	1
PR	Nucleosides and Nucleotides	pyrimidine conversions	-	up	poly	poly	294.60915	1436.40198	570.64095	3
PR	Nucleosides and Nucleotides	pyrimidine conversions	up	-	mono	mono	1380.63503	86.23679	40.14559	1
PR	Nucleosides and Nucleotides	Pyrimidine de novo biosynthesis in plants	-	up	poly	poly	2690.59213	6249.4574	3176.28123	4
PR	Nucleosides and Nucleotides	Pyrimidine utilization	-	down	poly	poly	585.87914	158.03235	701.59206	3
PR	Nucleosides and Nucleotides	Ribonucleotide reduction	down	down	DOWNcore	core	1271.75559	997.87142	2728.94459	2
PR	Nucleotide sugars	GDP-sugars biosynthesis and interconversions in plants	-	up	poly	poly	408.01106	1219.95639	405.27934	1
PR	Nucleotide sugars	GDP-sugars biosynthesis and interconversions in plants	down	-	mono	mono	304.15200000000004	782.33844	641.37367	2
PR	Nucleotide sugars	UDP-D-glucuronate, UDP-D-xylose and UDP-D-apiose biosynthesis in plants	-	up	poly	poly	632.84696	2209.69856	1154.6637700000001	1
PR	Nucleotide sugars	UDP-glucose and UDP-galactose biosynthesis in plants	-	up	poly	poly	261.56665	512.9643	232.27094	1
PR	Nucleotide sugars	UDP-glucose and UDP-galactose biosynthesis in plants	down	-	mono	mono	690.38241	1937.59557	2078.01245	1
PR	Phages and Transposable Elements	Integrons	up	-	mono	mono	282.20482	22.59015	2.86754	2
PR	Phages and Transposable Elements	Phage capsid proteins	down	down	DOWNcore	core	5.4884	4.33977	25.80788	1
PR	Phages and Transposable Elements	Phage cyanophage	down	-	mono	mono	263.02891	674.68379	1006.50741	2
PR	Phages and Transposable Elements	Staphylococcal pathogenicity islands SaPI	-	up	poly	poly	561.45517	1515.81447	800.04435	1
PR	Phages and Transposable Elements	Staphylococcal pathogenicity islands SaPI	down	-	mono	mono	310.53954	1295.22206	1342.00988	1
PR	Phages and Transposable Elements	T4-like non-cyanophage core proteins	-	up	poly	poly	80.90121	539.39691	205.50721	1
PR	Phages and Transposable Elements	T7-like cyanophage core proteins	down	down	DOWNcore	core	1134.00267	848.03365	2364.7667	1
PR	Phosphorus Metabolism	Alkylphosphonate utilization	-	up	poly	poly	52.66301	152.85728	67.86517	1
PR	Phosphorus Metabolism	Alkylphosphonate utilization	up	-	mono	mono	267.76505	28.02486	2.86754	1
PR	Phosphorus Metabolism	P uptake (cyanobacteria)	down	-	mono	mono	260.13541	666.50755	969.22936	1
PR	Phosphorus Metabolism	Phosphate metabolism	-	down	poly	poly	891.8134	463.96222	1380.24378	1
PR	Phosphorus Metabolism	Phosphate metabolism	-	up	poly	poly	1086.1364899999999	2932.74648	995.9930899999999	5
PR	Phosphorus Metabolism	Phosphate metabolism	down	-	mono	mono	690.38241	1937.59557	2078.01245	1
PR	Phosphorus Metabolism	Phosphate metabolism	up	-	mono	mono	3936.9384099999997	560.06117	588.80205	4
PR	Phosphorus Metabolism	Phosphate metabolism	up	down	monoUP-polyDOWN	mixed	1079.1634	92.59545	250.43204	1
PR	Phosphorus Metabolism	Phosphate metabolism	up	up	UPcore	core	2023.9984100000001	2538.56692	918.56944	4
PR	Phosphorus Metabolism	Phosphonate metabolism	up	-	mono	mono	41.57866	7.92958	0	1
PR	Photosynthesis	Bacterial light-harvesting proteins	down	-	mono	mono	73.91355999999999	74.07309	287.71009000000004	3
PR	Photosynthesis	Photosystem II-type photosynthetic reaction center	down	-	mono	mono	34.03526	35.022490000000005	430.13138000000004	2
PR	Potassium metabolism	Glutathione-regulated potassium-efflux system and associated functions	down	-	mono	mono	61.384420000000006	201.65037999999998	226.53584999999998	2
PR	Potassium metabolism	Glutathione-regulated potassium-efflux system and associated functions	up	-	mono	mono	3503.5280000000002	709.2143100000001	367.04544	3
PR	Potassium metabolism	Hyperosmotic potassium uptake	-	up	poly	poly	30.23154	288.91711	14.33771	1
PR	Potassium metabolism	pH adaptation potassium efflux system	down	-	mono	mono	5.38556	51.06898	15.29356	1
PR	Potassium metabolism	Potassium homeostasis	-	up	poly	poly	140.86286	571.4009	202.63967	1
PR	Potassium metabolism	Potassium homeostasis	up	-	mono	mono	1850.60541	1206.83376	775.19232	2
PR	Potassium metabolism	Potassium homeostasis	up	up	UPcore	core	188.00185	194.31943	35.36636	1
PR	Predictions based on plant-prokaryote comparative analysis	At1g21350	up	-	mono	mono	1027.88907	74.87572	76.4678	1
PR	Predictions based on plant-prokaryote comparative analysis	At1g21350	up	down	monoUP-polyDOWN	mixed	1140.86832	62.56537	238.00603	1
PR	Predictions based on plant-prokaryote comparative analysis	At2g23840	-	up	poly	poly	291.42495	1186.26116	527.62782	1
PR	Predictions based on plant-prokaryote comparative analysis	At2g25870	-	up	poly	poly	300.64604	532.67394	301.09196	1
PR	Predictions based on plant-prokaryote comparative analysis	At3g21300	up	-	mono	mono	20.62514	17.44508	1.91169	1
PR	Predictions based on plant-prokaryote comparative analysis	At4g10620 At3g57180 At3g47450	-	up	poly	poly	353.60436	1341.50565	574.46434	3
PR	Protein Metabolism	EC 3.4.24.- Metalloendopeptidases	down	down	DOWNcore	core	16.78582	21.89718	91.76136	1
PR	Protein Metabolism	EC 6.1.1.- Ligases forming aminoacyl-tRNA and related compounds	-	up	poly	poly	523.78988	1467.23202	969.22936	1
PR	Protein Metabolism	Glycine reductase, sarcosine reductase and betaine reductase	up	-	mono	mono	974.36178	709.85759	492.26146	1
PR	Protein Metabolism	Inteins	down	-	mono	mono	3.24499	17.41742	34.41051	1
PR	Protein Metabolism	Lipoprotein Biosynthesis	up	up	UPcore	core	435.14236	529.26478	154.8473	2
PR	Protein Metabolism	N-linked Glycosylation in Bacteria	-	up	poly	poly	3.28008	50.26702	4.77924	1
PR	Protein Metabolism	N-linked Glycosylation in Bacteria	up	-	mono	mono	45.54126	19.59497	1.91169	1
PR	Protein Metabolism	Peptidyl-prolyl cis-trans isomerase	-	down	poly	poly	970.8818100000001	295.78575	964.45012	2
PR	Protein Metabolism	Peptidyl-prolyl cis-trans isomerase	-	up	poly	poly	720.67326	2839.27003	974.96444	1
PR	Protein Metabolism	Periplasmic disulfide interchange	-	down	poly	poly	854.88611	147.4099	396.67671	1
PR	Protein Metabolism	Periplasmic disulfide interchange	up	down	monoUP-polyDOWN	mixed	378.82565	65.2469	202.63967	1
PR	Protein Metabolism	Periplasmic disulfide interchange	up	up	UPcore	core	317.77484	906.82489	206.46306	1
PR	Protein Metabolism	Prolyl-tRNA synthetase associated editing enzymes	down	-	mono	mono	1.35696	54.56612	8.60263	1
PR	Protein Metabolism	Prolyl-tRNA synthetase associated editing enzymes	down	up	monoDOWN-polyUP	mixed	118.15339	989.26021	332.63493	1
PR	Protein Metabolism	Prolyl-tRNA synthetase associated editing enzymes	up	-	mono	mono	4897.40381	733.87067	386.16239	4
PR	Protein Metabolism	Protein Acetylation and Deacetylation in Bacteria	-	down	poly	poly	3075.15604	1486.72034	5452.1541	1
PR	Protein Metabolism	Protein chaperones	up	down	monoUP-polyDOWN	mixed	424.97478	27.51822	101.31983	1
PR	Protein Metabolism	Protein chaperones	up	up	UPcore	core	533.44473	143.93008	9.55847	1
PR	Protein Metabolism	Protein degradation	down	-	mono	mono	25.9791	126.71133	136.68619	1
PR	Protein Metabolism	Protein degradation	up	-	mono	mono	690.765	116.59319	163.44992	1
PR	Protein Metabolism	Protein degradation	up	up	UPcore	core	182.65475	325.07321	118.52509	1
PR	Protein Metabolism	Proteolysis in bacteria, ATP-dependent	down	-	mono	mono	2.52952	11.61972	26.76373	1
PR	Protein Metabolism	Proteolysis in bacteria, ATP-dependent	up	-	mono	mono	16637.30212	3135.94345	3238.41129	5
PR	Protein Metabolism	Putative TldE-TldD proteolytic complex	up	-	mono	mono	10.39098	5.36772	0	1
PR	Protein Metabolism	Putative TldE-TldD proteolytic complex	up	down	monoUP-polyDOWN	mixed	199.3383	19.405639999999998	67.86517	1
PR	Protein Metabolism	Ribosomal protein S12p Asp methylthiotransferase	-	up	poly	poly	853.7850699999999	2781.2674500000003	1265.5420800000002	2
PR	Protein Metabolism	Ribosome activity modulation	down	down	DOWNcore	core	139.36347	73.89244	230.35925	1
PR	Protein Metabolism	Ribosome activity modulation	up	-	mono	mono	7345.32301	462.17864000000003	725.48824	3
PR	Protein Metabolism	Ribosome biogenesis bacterial	-	up	poly	poly	775.46229	2561.34204	930.99545	6
PR	Protein Metabolism	Ribosome biogenesis bacterial	down	-	mono	mono	78.70927	329.72129	216.02153	1
PR	Protein Metabolism	Ribosome biogenesis bacterial	up	-	mono	mono	520.82175	227.81400000000002	252.34373	2
PR	Protein Metabolism	Ribosome LSU bacterial	down	-	mono	mono	195.23908	598.40412	888.93817	1
PR	Protein Metabolism	Ribosome LSU eukaryotic and archaeal	-	down	poly	poly	2.26158	0.93928	4.77924	2
PR	Protein Metabolism	Ribosome SSU bacterial	-	up	poly	poly	1098.08774	3778.41551	1737.73074	1
PR	Protein Metabolism	Ribosome SSU bacterial	down	-	mono	mono	310.53954	1295.22206	1342.00988	1
PR	Protein Metabolism	Selenocysteine metabolism	down	-	mono	mono	4.25936	46.31156	60.21839	2
PR	Protein Metabolism	Signal peptidase	-	up	poly	poly	231.0764	864.7351	389.98578	1
PR	Protein Metabolism	Translation elongation factor G family	down	-	mono	mono	383.17863	412.85191	2964.08307	1
PR	Protein Metabolism	Translation elongation factors eukaryotic and archaeal	-	down	poly	poly	25.13929	16.12615	191.1695	1
PR	Protein Metabolism	Translation initiation factors bacterial	-	up	poly	poly	115.57488	464.72585	120.43678	1
PR	Protein Metabolism	Translation termination factors bacterial	-	up	poly	poly	291.42495	1186.26116	527.62782	1
PR	Protein Metabolism	Translation termination factors bacterial	up	up	UPcore	core	892.03053	530.12373	305.8712	1
PR	Protein Metabolism	tRNA aminoacylation, Glu and Gln	-	up	poly	poly	811.55143	2896.91501	1300.90843	2
PR	Protein Metabolism	tRNA synthetase relationships	-	up	poly	poly	187.6179	1618.05006	374.69222	1
PR	Protein Metabolism	Universal GTPases	-	up	poly	poly	5866.25671	14700.46038	7938.31342	10
PR	Protein Metabolism	Universal GTPases	up	-	mono	mono	2762.67686	914.53182	535.2746	1
PR	Regulation and Cell signaling	cAMP signaling in bacteria	-	down	poly	poly	818.21621	323.48996	761.81045	1
PR	Regulation and Cell signaling	cAMP signaling in bacteria	down	-	mono	mono	0	2.31788	11.47017	1
PR	Regulation and Cell signaling	cAMP signaling in bacteria	up	-	mono	mono	1638.83107	293.43420000000003	186.39027	3
PR	Regulation and Cell signaling	cAMP signaling in bacteria	up	up	UPcore	core	150.79095	209.4523	66.90932	1
PR	Regulation and Cell signaling	DNA-binding regulatory proteins, strays	up	-	mono	mono	531.71695	118.70975	253.29959	1
PR	Regulation and Cell signaling	Iojap	-	up	poly	poly	1278.06914	2230.56147	1044.7413000000001	5
PR	Regulation and Cell signaling	Iojap	up	-	mono	mono	152.24931	13.35196	0	1
PR	Regulation and Cell signaling	Murein hydrolase regulation and cell death	-	up	poly	poly	24.61591	147.37157	23.89619	1
PR	Regulation and Cell signaling	Murein hydrolase regulation and cell death	up	-	mono	mono	560.30085	34.40486	48.74822	2
PR	Regulation and Cell signaling	Orphan regulatory proteins	up	-	mono	mono	1410.76214	156.84374	68.82102	7
PR	Regulation and Cell signaling	Oxygen and light sensor PpaA-PpsR	up	-	mono	mono	77.67206	27.12524	7.64678	1
PR	Regulation and Cell signaling	Plastidial (p)ppGpp-mediated response in plants	up	-	mono	mono	1307.9106	144.03941	154.84729	1
PR	Regulation and Cell signaling	Quorum sensing regulation in Pseudomonas	up	-	mono	mono	219.87745	15.52052	28.67542	1
PR	Regulation and Cell signaling	Sex pheromones in Enterococcus faecalis and other Firmicutes	-	up	poly	poly	739.61992	855.8529	465.49773	1
PR	Regulation and Cell signaling	Sex pheromones in Enterococcus faecalis and other Firmicutes	down	down	DOWNcore	core	310.41818	331.49387	1023.71266	1
PR	Regulation and Cell signaling	Sex pheromones in Enterococcus faecalis and other Firmicutes	up	up	UPcore	core	220.60218	363.48485	96.5406	1
PR	Regulation and Cell signaling	Stringent Response, (p)ppGpp metabolism	up	-	mono	mono	188.41475	58.73957	25.80788	1
PR	Regulation and Cell signaling	Toxin-antitoxin systems (other than RelBE and MazEF)	up	-	mono	mono	241.99886	10.80543	7.64678	1
PR	Regulation and Cell signaling	Two-component regulatory systems in Campylobacter	up	-	mono	mono	2774.9216699999997	255.96819	563.95002	2
PR	Regulation and Cell signaling	Two-component regulatory systems in Campylobacter	up	down	monoUP-polyDOWN	mixed	982.35199	30.67805	106.09907	1
PR	Regulation and Cell signaling	Zinc regulated enzymes	-	up	poly	poly	623.21721	1878.26838	781.88325	1
PR	Regulation and Cell signaling	Zinc regulated enzymes	down	down	DOWNcore	core	96.42477	64.43061	368.00128	1
PR	Regulation and Cell signaling	Zinc regulated enzymes	up	-	mono	mono	184.99206	75.22904	29.63127	1
PR	Respiration	Anaerobic respiratory reductases	-	down	poly	poly	205.37675	80.21211	272.41654	1
PR	Respiration	Anaerobic respiratory reductases	-	up	poly	poly	111.17923	316.451	133.81865	1
PR	Respiration	Anaerobic respiratory reductases	down	-	mono	mono	5.15416	16.25781	95.58475	1
PR	Respiration	Anaerobic respiratory reductases	up	-	mono	mono	8753.50529	3223.66313	3850.1537	2
PR	Respiration	Biogenesis of c-type cytochromes	-	down	poly	poly	854.88611	147.4099	396.67671	1
PR	Respiration	Biogenesis of c-type cytochromes	-	up	poly	poly	218.18854	1315.92066	212.19814	1
PR	Respiration	Biogenesis of c-type cytochromes	up	-	mono	mono	138.21738	34.91149	5.73508	1
PR	Respiration	Biogenesis of c-type cytochromes	up	up	UPcore	core	317.77484	906.82489	206.46306	1
PR	Respiration	Biogenesis of cbb3-type cytochrome c oxidases	up	-	mono	mono	61.55293	15.00521	2.86754	1
PR	Respiration	Biogenesis of cytochrome c oxidases	-	up	poly	poly	725.55296	1552.4192	570.64095	3
PR	Respiration	Biogenesis of cytochrome c oxidases	down	down	DOWNcore	core	196.84553	96.21493	685.34265	1
PR	Respiration	Carbon monoxide dehydrogenase maturation factors	down	down	DOWNcore	core	37.51509	30.38473	162.49407	1
PR	Respiration	CO Dehydrogenase	-	down	poly	poly	79.69761	30.75971	188.30196	1
PR	Respiration	CO Dehydrogenase	down	-	mono	mono	1.31086	7.32561	21.98449	1
PR	Respiration	CO Dehydrogenase	down	down	DOWNcore	core	659.51424	379.04237	2265.3585599999997	4
PR	Respiration	Formate hydrogenase	-	down	poly	poly	16.41895	7.41094	28.67542	1
PR	Respiration	Formate hydrogenase	down	-	mono	mono	66.54343	60.43482	206.46304999999998	2
PR	Respiration	Formate hydrogenase	down	down	DOWNcore	core	2596.4236	1097.88281	6470.13167	4
PR	Respiration	Formate hydrogenase	up	-	mono	mono	457.70093	79.45648	18.1611	1
PR	Respiration	Hydrogenases	-	up	poly	poly	10.71401	353.16705	13.38186	1
PR	Respiration	Na(+)-translocating NADH-quinone oxidoreductase and rnf-like group of electron transport complexes	-	up	poly	poly	3254.23835	6665.77805	2979.3766299999997	6
PR	Respiration	Na(+)-translocating NADH-quinone oxidoreductase and rnf-like group of electron transport complexes	up	-	mono	mono	126.12518	4.93441	8.60263	1
PR	Respiration	Na+ translocating decarboxylases and related biotin-dependent enzymes	up	-	mono	mono	277.56587	92.58212	192.12535	1
PR	Respiration	Na+ translocating decarboxylases and related biotin-dependent enzymes	up	down	monoUP-polyDOWN	mixed	1451.42806	157.73535999999999	843.05749	2
PR	Respiration	Respiration / HGM	down	-	mono	mono	1.86161	14.26092	26.76373	1
PR	Respiration	Respiration / Human gut microbiome	-	up	poly	poly	37.32011	599.5504000000001	45.88067	2
PR	Respiration	Respiration / Human gut microbiome	up	down	monoUP-polyDOWN	mixed	2142.21668	241.13296	1080.10767	2
PR	Respiration	Respiration HGM	-	up	poly	poly	42.29997	123.29051	34.41051	1
PR	Respiration	Respiration HGM	up	down	monoUP-polyDOWN	mixed	94.00905	4.59909	11.47017	1
PR	Respiration	Respiratory Complex I	-	up	poly	poly	2.53962	163.2694	5.73508	1
PR	Respiration	Respiratory Complex I	down	-	mono	mono	116.69553	354.05768	372.78051999999997	2
PR	Respiration	Respiratory Complex I	up	-	mono	mono	508.7067	173.55952	234.18264	1
PR	Respiration	Respiratory dehydrogenases 1	-	down	poly	poly	1136.16983	165.68294	1328.62801	1
PR	Respiration	Respiratory dehydrogenases 1	down	-	mono	mono	0	1.97923	14.33771	1
PR	Respiration	Respiratory dehydrogenases 1	down	down	DOWNcore	core	205.83845	422.48108	1150.84038	1
PR	Respiration	Respiratory dehydrogenases 1	up	-	mono	mono	541.68161	236.26389	107.05492	1
PR	Respiration	Soluble cytochromes and functionally related electron carriers	down	-	mono	mono	129.7082	257.35211	405.27934	1
PR	Respiration	Soluble cytochromes and functionally related electron carriers	up	-	mono	mono	2975.56564	452.35316	191.1695	1
PR	Respiration	Soluble cytochromes and functionally related electron carriers	up	down	monoUP-polyDOWN	mixed	953.93975	131.42841	750.34028	1
PR	Respiration	Terminal cytochrome C oxidases	down	-	mono	mono	160.75303	1247.18561	1729.1281199999999	2
PR	Respiration	Terminal cytochrome C oxidases	down	down	DOWNcore	core	93.94525	290.20204	1359.21513	1
PR	Respiration	Terminal cytochrome C oxidases	down	up	monoDOWN-polyUP	mixed	228.64642	1983.39712	885.11478	1
PR	Respiration	Terminal cytochrome C oxidases	up	-	mono	mono	2974.35224	729.33091	730.26748	3
PR	Respiration	Terminal cytochrome C oxidases	up	up	UPcore	core	930.9119000000001	363.81016	56.394999999999996	3
PR	Respiration	Terminal cytochrome oxidases	up	-	mono	mono	1631.4956	131.97205	42.05728	2
PR	Respiration	V-Type ATP synthase in plants (vacuolar)	down	-	mono	mono	2.83877	6.16668	10.51432	1
PR	RNA Metabolism	ATP-dependent RNA helicases, bacterial	-	down	poly	poly	587.3473799999999	144.41005	904.23173	2
PR	RNA Metabolism	ATP-dependent RNA helicases, bacterial	-	up	poly	poly	438.55817	1724.4221499999999	979.7436799999999	2
PR	RNA Metabolism	ATP-dependent RNA helicases, bacterial	down	-	mono	mono	12.68747	25.04468	104.18738	1
PR	RNA Metabolism	ATP-dependent RNA helicases, bacterial	up	-	mono	mono	22.0077	0.5733	0	1
PR	RNA Metabolism	ATP-dependent RNA helicases, bacterial	up	down	monoUP-polyDOWN	mixed	206.6974	29.40612	86.02627	1
PR	RNA Metabolism	Methylthiotransferases	-	up	poly	poly	275.19649	1389.59444	484.61468	1
PR	RNA Metabolism	Polyadenylation bacterial	down	-	mono	mono	997.9915	1851.83908	2816.88256	1
PR	RNA Metabolism	Polyadenylation bacterial	up	-	mono	mono	500.38372	121.71992	178.74348	1
PR	RNA Metabolism	Polyadenylation bacterial	up	down	monoUP-polyDOWN	mixed	1817.35851	100.5067	279.10747	1
PR	RNA Metabolism	Polyadenylation bacterial	up	up	UPcore	core	415.83274	751.83272	170.14085	1
PR	RNA Metabolism	Q RZ	-	up	poly	poly	260.7505	1171.6616	390.94162	1
PR	RNA Metabolism	Queuosine-Archaeosine Biosynthesis	-	up	poly	poly	1288.48885	7066.62858	2539.68679	4
PR	RNA Metabolism	Queuosine-Archaeosine Biosynthesis	down	down	DOWNcore	core	96.42477	64.43061	368.00128	1
PR	RNA Metabolism	Queuosine-Archaeosine Biosynthesis	up	up	UPcore	core	895.10447	1393.18128	302.04781	1
PR	RNA Metabolism	Ribonuclease H	-	up	poly	poly	41.86925	223.82688	66.90932	1
PR	RNA Metabolism	RNA polymerase archaeal initiation factors	down	down	DOWNcore	core	8.91778	4.24211	48.74822	1
PR	RNA Metabolism	RNA processing and degradation, bacterial	-	down	poly	poly	1.3721	0	0	1
PR	RNA Metabolism	RNA processing and degradation, bacterial	-	up	poly	poly	981.54743	3761.96408	1504.50395	2
PR	RNA Metabolism	RNA processing and degradation, bacterial	up	up	UPcore	core	2138.72556	1810.12995	1080.10767	1
PR	RNA Metabolism	RNA pseudouridine syntheses	-	up	poly	poly	323.76988	666.90387	308.73874	1
PR	RNA Metabolism	Rrf2 family transcriptional regulators	up	down	monoUP-polyDOWN	mixed	1267.93995	157.22305	639.46197	1
PR	RNA Metabolism	rRNA modification bacteria	-	up	poly	poly	676.1872	1884.34539	736.00256	4
PR	RNA Metabolism	rRNA modification bacteria	up	-	mono	mono	520.82175	227.81400000000002	252.34373	2
PR	RNA Metabolism	RtcB RtcA	-	up	poly	poly	1034.85679	2427.30078	1447.1531	1
PR	RNA Metabolism	RtcB RtcA	up	-	mono	mono	534.79514	6.53266	4.77924	1
PR	RNA Metabolism	Transcription factors bacterial	-	up	poly	poly	905.1052199999999	3626.54093	1058.12317	3
PR	RNA Metabolism	Transcription initiation, bacterial sigma factors	-	down	poly	poly	2248.80519	360.40801	1799.86083	4
PR	RNA Metabolism	Transcription initiation, bacterial sigma factors	down	down	DOWNcore	core	71.07226	36.26642	246.60865	1
PR	RNA Metabolism	Transcription initiation, bacterial sigma factors	up	-	mono	mono	2134.78255	127.15164	239.91772	2
PR	RNA Metabolism	Transcription initiation, bacterial sigma factors	up	down	monoUP-polyDOWN	mixed	3292.12217	384.0931	1222.52894	1
PR	RNA Metabolism	tRNA modification Archaea	-	up	poly	poly	969.0079000000001	2218.05414	1278.9239400000001	2
PR	RNA Metabolism	tRNA modification Archaea	up	up	UPcore	core	31.27727	49.33973	0	1
PR	RNA Metabolism	tRNA modification yeast mitochondrial	-	up	poly	poly	212.35861	912.06195	256.16713	1
PR	RNA Metabolism	tRNA mods Archaea	-	up	poly	poly	187.6179	1618.05006	374.69222	1
PR	RNA Metabolism	tRNA mods Archaea	up	down	monoUP-polyDOWN	mixed	2440.34889	116.19254	831.58732	1
PR	RNA Metabolism	tRNA processing	-	up	poly	poly	78.70537	570.73359	84.11458	1
PR	RNA Metabolism	tRNA processing	up	-	mono	mono	730.5111999999999	320.45379	434.91061	2
PR	RNA Metabolism	tRNA processing	up	up	UPcore	core	278.6835	331.68019	58.3067	1
PR	RNA Metabolism	YrdC-YciO	up	-	mono	mono	161.42017	45.28661	48.74822	1
PR	RNA Metabolism	YrdC-YciO-Sua5 and associated protein families	-	up	poly	poly	51.84003	127.19896	21.98449	1
PR	Secondary Metabolism	Auxin biosynthesis	up	-	mono	mono	444.60925	232.95173	116.61339	1
PR	Secondary Metabolism	Phenylpropionate Degradation	up	-	mono	mono	81.21813	5.29439	4.77924	1
PR	Secondary Metabolism	Steroid sulfates	down	-	mono	mono	275.45268	724.77949	974.00859	1
PR	Secondary Metabolism	Tannin biosynthesis	-	up	poly	poly	1.92644	65.69287	14.33771	1
PR	Stress Response	At5g63290	-	up	poly	poly	1600.95416	3342.26824	1849.56489	2
PR	Stress Response	At5g63290	down	-	mono	mono	21.91395	85.71449	72.64441	1
PR	Stress Response	At5g63290	up	-	mono	mono	531.64481	190.61763	296.31272	1
PR	Stress Response	Bacterial hemoglobins	up	-	mono	mono	2178.52031	501.78057	231.31509	3
PR	Stress Response	Choline and Betaine Uptake and Betaine Biosynthesis	down	down	DOWNcore	core	581.38299	512.64999	4659.75653	1
PR	Stress Response	Choline and Betaine Uptake and Betaine Biosynthesis	up	-	mono	mono	1837.08613	265.49068	119.48092999999999	2
PR	Stress Response	Dimethylarginine metabolism	-	up	poly	poly	92.98025	826.35179	272.41654	1
PR	Stress Response	FOL Commensurate regulon activation	up	-	mono	mono	582.13886	170.08871	91.76136	1
PR	Stress Response	Glutaredoxins	up	-	mono	mono	988.08705	41.19983	32.49881	2
PR	Stress Response	Glutathione-dependent pathway of formaldehyde detoxification	up	-	mono	mono	1201.50593	230.03988	328.81154	3
PR	Stress Response	Glutathione: Non-redox reactions	up	-	mono	mono	763.21571	152.63229	167.27331	2
PR	Stress Response	Heat shock dnaK gene cluster extended	-	up	poly	poly	668.61973	2748.0088699999997	1062.90242	5
PR	Stress Response	Heat shock dnaK gene cluster extended	up	-	mono	mono	2614.49602	569.84432	538.1421399999999	3
PR	Stress Response	Heat shock dnaK gene cluster extended	up	down	monoUP-polyDOWN	mixed	3292.12217	384.0931	1222.52894	1
PR	Stress Response	Hfl operon	-	down	poly	poly	3018.2222	733.1040399999999	2546.37772	3
PR	Stress Response	Hfl operon	up	-	mono	mono	2762.67686	914.53182	535.2746	1
PR	Stress Response	Hfl operon	up	down	monoUP-polyDOWN	mixed	1817.35851	100.5067	279.10747	1
PR	Stress Response	Housecleaning nucleoside triphosphate pyrophosphatases	-	up	poly	poly	237.19094	714.13771	259.03467	2
PR	Stress Response	Nudix KE	-	down	poly	poly	651.01302	162.31012	372.78052	1
PR	Stress Response	Nudix KE	-	up	poly	poly	163.87358	235.52626	122.34848	1
PR	Stress Response	Nudix KE	up	-	mono	mono	534.08134	69.77599	120.43679	2
PR	Stress Response	Osmoregulation	up	-	mono	mono	8179.1082	142.10118	314.47383	1
PR	Stress Response	Oxidative stress	down	-	mono	mono	1.35696	54.56612	8.60263	1
PR	Stress Response	Oxidative stress	down	down	DOWNcore	core	356.9702	264.00709	1977.6484599999999	1
PR	Stress Response	Oxidative stress	down	up	monoDOWN-polyUP	mixed	69.67624	378.4364	177.78763	1
PR	Stress Response	Oxidative stress	up	-	mono	mono	7448.35977	1193.73011	936.73054	8
PR	Stress Response	Oxidative stress	up	down	monoUP-polyDOWN	mixed	94.80675	9.14918	12.42602	1
PR	Stress Response	Oxygen stress response / Human gut microbiome	up	-	mono	mono	8294.230599999999	1771.72965	1905.00406	4
PR	Stress Response	Oxygen stress response / Human gut microbiome	up	down	monoUP-polyDOWN	mixed	1140.86832	62.56537	238.00603	1
PR	Stress Response	Periplasmic Stress Response	-	down	poly	poly	1041.5835200000001	118.38376	590.71375	2
PR	Stress Response	Periplasmic Stress Response	-	up	poly	poly	1460.2931800000001	3695.12293	1440.46217	2
PR	Stress Response	Periplasmic Stress Response	up	-	mono	mono	376.72838	52.38591	101.31983	1
PR	Stress Response	Redox-dependent regulation of nucleus processes	-	down	poly	poly	1251.72691	319.81781	1865.81431	1
PR	Stress Response	Redox-dependent regulation of nucleus processes	-	up	poly	poly	937.5085	2960.95297	1420.38937	1
PR	Stress Response	Regulation of Oxidative Stress Response	up	-	mono	mono	43.52537	2.42154	0	1
PR	Stress Response	Rubrerythrin	down	down	DOWNcore	core	133.17286000000001	174.95711	707.32715	2
PR	Stress Response	SigmaB stress responce regulation	up	-	mono	mono	1214.85522	196.109	150.06806	1
PR	Stress Response	Synthesis of osmoregulated periplasmic glucans	-	up	poly	poly	44.11646	375.10724	8.60263	1
PR	Stress Response	Universal stress protein family	down	-	mono	mono	0	3.25716	0.95585	1
PR	Stress Response	Universal stress protein family	up	-	mono	mono	1655.1306	57.91895	84.11458	4
PR	Stress Response	Uptake of selenate and selenite	down	-	mono	mono	11.99033	50.532	34.41051	1
PR	Sulfur Metabolism	Alkanesulfonate assimilation	down	-	mono	mono	400.78278	935.19973	1515.97412	5
PR	Sulfur Metabolism	Alkanesulfonate assimilation	down	down	DOWNcore	core	31.95575	11.86971	61.17424	1
PR	Sulfur Metabolism	At5g37530 (CsdL protein family)	up	down	monoUP-polyDOWN	mixed	1267.93995	157.22305	639.46197	1
PR	Sulfur Metabolism	Inorganic Sulfur Assimilation	-	up	poly	poly	42.29997	123.29051	34.41051	1
PR	Sulfur Metabolism	Inorganic Sulfur Assimilation	down	-	mono	mono	242.3354	943.8446100000001	1335.3189399999999	3
PR	Sulfur Metabolism	Inorganic Sulfur Assimilation	down	down	DOWNcore	core	656.32885	385.54134999999997	2554.0245	2
PR	Sulfur Metabolism	Inorganic Sulfur Assimilation	up	-	mono	mono	3053.39635	463.21659	202.63967	2
PR	Sulfur Metabolism	Taurine Utilization	down	-	mono	mono	15.67611	42.42243	30.58712	1
PR	Sulfur Metabolism	Taurine Utilization	down	down	DOWNcore	core	169.82378	103.6992	460.71849	1
PR	Sulfur Metabolism	Thioredoxin-disulfide reductase	up	-	mono	mono	1027.88907	74.87572	76.4678	1
PR	Sulfur Metabolism	Thioredoxin-disulfide reductase	up	down	monoUP-polyDOWN	mixed	1140.86832	62.56537	238.00603	1
PR	Transcriptional regulation	CarD	-	up	poly	poly	885.79153	2102.25058	772.32477	2
PR	Transcriptional regulation	CarD	down	down	DOWNcore	core	71.07226	36.26642	246.60865	1
PR	Unclassified	AdoMet Repair LMTB	-	up	poly	poly	469.39494	2204.37883	1189.07428	1
PR	Unclassified	AOU COG3236	-	up	poly	poly	60.37359	381.00993	76.4678	1
PR	Unclassified	AOU COG3236	up	-	mono	mono	152.24931	13.35196	0	1
PR	Unclassified	AOU COG3236	up	up	UPcore	core	174.91207	273.49559	25.80788	1
PR	Unclassified	CBSS-1148.35.peg.210	down	-	mono	mono	1804.76929	2283.73037	6173.81895	1
PR	Unclassified	CBSS-1148.35.peg.210	up	up	UPcore	core	143.09351	383.18248	45.88068	1
PR	Unclassified	CBSS-195102.1.peg.963	up	-	mono	mono	1400.82069	464.67352	408.14688	3
PR	Unclassified	CBSS-195102.1.peg.963	up	up	UPcore	core	309.82525	481.53497	169.18501	1
PR	Unclassified	CBSS-227321.4.peg.3751	-	down	poly	poly	172.6155	58.74424	346.01679	1
PR	Unclassified	CBSS-227321.4.peg.3751	down	-	mono	mono	11533.65385	11907.05892	43010.26963	1
PR	Unclassified	Chorismate: Intermediate for synthesis of Tryptophan, PAPA antibiotics, PABA, 3-hydroxyanthranilate and more.	-	up	poly	poly	105.06193	481.83595	129.99526	1
PR	Unclassified	Chorismate: Intermediate for synthesis of Tryptophan, PAPA antibiotics, PABA, 3-hydroxyanthranilate and more.	up	-	mono	mono	1006.75922	258.59471	131.90695	2
PR	Unclassified	Chorismate: Intermediate for synthesis of Tryptophan, PAPA antibiotics, PABA, 3-hydroxyanthranilate and more.	up	up	UPcore	core	195.96221	410.77269	135.73034	1
PR	Unclassified	CoA Test	-	up	poly	poly	676.73178	1997.79873	732.17918	5
PR	Unclassified	CoA Test	down	-	mono	mono	736.93824	746.19002	1357.30344	1
PR	Unclassified	CoA Test	up	-	mono	mono	333.31845	25.70698	9.55847	1
PR	Unclassified	Family 02 Ca2+ P-type ATPase	-	down	poly	poly	5895.7561	2603.99349	7259.66171	1
PR	Unclassified	Family 02 Ca2+ P-type ATPase	-	up	poly	poly	1849.12246	6061.98058	2886.6594299999997	5
PR	Unclassified	Family 02 Ca2+ P-type ATPase	up	-	mono	mono	5396.696239999999	166.44022999999999	142.42128	3
PR	Unclassified	Family 23 FUPA23 P-type ATPase	-	down	poly	poly	1167.03697	416.09408	1750.15676	1
PR	Unclassified	Family 23 FUPA23 P-type ATPase	-	up	poly	poly	953.86757	3175.59837	1351.56836	4
PR	Unclassified	Family 23 FUPA23 P-type ATPase	down	-	mono	mono	1107.8959399999999	2040.24549	3059.66782	2
PR	Unclassified	Family 23 FUPA23 P-type ATPase	down	down	DOWNcore	core	282.67162	112.73139	705.41545	1
PR	Unclassified	Family 23 FUPA23 P-type ATPase	up	-	mono	mono	21745.44963	4205.970090000001	6221.61133	2
PR	Unclassified	Family 24 FUPA24 P-type ATPase	-	up	poly	poly	504.59741	1003.88377	374.69222	1
PR	Unclassified	Family 24 FUPA24 P-type ATPase ver.1	up	up	UPcore	core	892.03053	530.12373	305.8712	1
PR	Unclassified	FIG039061: hypothetical protein related to heme utilization	down	-	mono	mono	243.96918	559.69218	909.96681	1
PR	Unclassified	FIG039061: hypothetical protein related to heme utilization	up	-	mono	mono	69.00814	2.31788	0	1
PR	Unclassified	Glutaconate CoA-transferase or 3-oxoadipate CoA-transferase Subunits	up	-	mono	mono	326.13807	63.00235	73.60026	1
PR	Unclassified	Heme and Siroheme Biosynthesis	-	up	poly	poly	22.56885	354.64065	48.74822	1
PR	Unclassified	Heme and Siroheme Biosynthesis	up	-	mono	mono	69.48194	29.53144	7.64678	1
PR	Unclassified	Heme LB	-	up	poly	poly	1259.09812	3519.88621	1747.28921	2
PR	Unclassified	Heme LB	down	-	mono	mono	21.91395	85.71449	72.64441	1
PR	Unclassified	Heme LB	up	-	mono	mono	2076.21824	995.84654	660.49062	2
PR	Unclassified	Heme LB	up	up	UPcore	core	1573.69727	875.26323	347.92849	2
PR	Unclassified	NAD and NADP - test subsystem	-	up	poly	poly	481.52354	2866.77759	673.87248	4
PR	Unclassified	PROSC YggS	-	down	poly	poly	818.21621	323.48996	761.81045	1
PR	Unclassified	PROSC YggS	-	up	poly	poly	2725.45982	6520.70874	2997.53773	8
PR	Unclassified	PROSC YggS	up	up	UPcore	core	886.03809	1483.96015	398.5884	1
PR	Unclassified	Unclassified	-	up	poly	poly	94.04498	1313.77443	106.09906000000001	22
PR	Unclassified	Unclassified	up	-	mono	mono	1293.87517	259.90962	18.1611	50
PR	Unclassified	Unclassified	up	up	UPcore	core	441.16568	133.38731	2.86754	8
PR	Unclassified	YggSProC	-	up	poly	poly	2136.8069	5079.97968	2481.38009	4
PR	Unclassified	YggSProC	up	up	UPcore	core	220.60218	363.48485	96.5406	1
PR	Virulence	Arsenic resistance	-	up	poly	poly	131.88221000000001	576.22198	200.72796999999997	2
PR	Virulence	Arsenic resistance	up	-	mono	mono	35.12052	19.45464	13.38186	1
PR	Virulence	Bacterial cyanide production and tolerance mechanisms	down	-	mono	mono	54.05708	36.00644	193.08119	1
PR	Virulence	BlaR1 Family Regulatory Sensor-transducer Disambiguation	up	-	mono	mono	1505.0345	478.4288	108.01077	1
PR	Virulence	C jejuni colonization of chick caeca	-	down	poly	poly	3494.67856	692.74617	3102.6809599999997	3
PR	Virulence	C jejuni colonization of chick caeca	up	-	mono	mono	1624.84244	136.04684	178.74348	2
PR	Virulence	Cobalt-zinc-cadmium resistance	-	up	poly	poly	179.05307	1237.39413	476.01205	1
PR	Virulence	Cobalt-zinc-cadmium resistance	up	-	mono	mono	3409.11455	385.68234	595.49298	4
PR	Virulence	Colicin V and Bacteriocin Production Cluster	-	up	poly	poly	1592.93196	2992.55533	1625.89659	3
PR	Virulence	Copper homeostasis	up	-	mono	mono	1718.29657	243.29416999999998	104.18737	4
PR	Virulence	Copper homeostasis: copper tolerance	up	-	mono	mono	701.48948	303.1477	240.87357	1
PR	Virulence	Heat shock protein Hsp22.5 involved in pathogenesis of Mycobacterium tuberculosis	up	up	UPcore	core	188.00185	194.31943	35.36636	1
PR	Virulence	Legionella pneumophila Potential Resistome	-	up	poly	poly	952.04519	1786.32588	1027.53605	1
PR	Virulence	Legionella pneumophila Virulome	-	down	poly	poly	6412.6722	791.0469899999999	5977.87021	7
PR	Virulence	Legionella pneumophila Virulome	up	-	mono	mono	2956.00448	957.6778800000001	557.2591	4
PR	Virulence	Legionella pneumophila Virulome	up	down	monoUP-polyDOWN	mixed	1817.35851	100.5067	279.10747	1
PR	Virulence	Listeria surface proteins: Internalin-like proteins	down	up	monoDOWN-polyUP	mixed	19.60391	592.41512	121.39263	1
PR	Virulence	Lysozyme inhibitors	up	-	mono	mono	64.75398	3.41582	0	1
PR	Virulence	MLST	-	up	poly	poly	232.26574	607.64165	291.53349	1
PR	Virulence	MLST	up	up	UPcore	core	147.87157	104.18451	22.94034	1
PR	Virulence	Monika MRSA	-	up	poly	poly	521.7728	1976.1185500000001	877.46799	2
PR	Virulence	MRSA analysis Oli	-	up	poly	poly	241.09175	1097.22886	248.52035	1
PR	Virulence	MRSA analysis Oli	up	-	mono	mono	26.89918	10.40579	2.86754	1
PR	Virulence	MRSA analysis Oli	up	up	UPcore	core	264.28812	287.24287	97.49644	1
PR	Virulence	Multidrug efflux pump in Campylobacter jejuni (CmeABC operon)	up	-	mono	mono	582.13886	170.08871	91.76136	1
PR	Virulence	Multidrug Resistance Efflux Pumps	-	up	poly	poly	671.18163	3646.89953	1713.83455	2
PR	Virulence	Multidrug Resistance Efflux Pumps	down	up	monoDOWN-polyUP	mixed	24.40227	401.96149	98.45229	1
PR	Virulence	Mycobacterial MmpL6 membrane protein cluster	up	-	mono	mono	200.21404	40.5872	21.02864	1
PR	Virulence	Mycobacterium virulence operon involved in fatty acids biosynthesis	down	up	monoDOWN-polyUP	mixed	14.74596	346.33942	134.7745	1
PR	Virulence	Mycobacterium virulence operon involved with a mostly uncharacterized dormancy regulon	up	-	mono	mono	340.44003	11.32707	4.77924	1
PR	Virulence	Mycobacterium virulence operon possibly involved in quinolinate biosynthesis	-	up	poly	poly	214.58958	623.00417	222.71247	1
PR	Virulence	Tolerance to colicin E2	up	-	mono	mono	48.68236	5.85569	1.91169	1
PR	Vitamins	5-FCL-like protein	-	up	poly	poly	1189.93556	3034.70442	1573.32498	3
PR	Vitamins	5-FCL-like protein	up	-	mono	mono	13020.89254	5371.81462	5489.43215	4
PR	Vitamins	BEY LIP	-	up	poly	poly	1013.86231	3107.96191	1207.23538	2
PR	Vitamins	Biotin biosynthesis in plants	-	up	poly	poly	81.16095	361.42763	90.80551	1
PR	Vitamins	Biotin HMP	-	up	poly	poly	44.91693	146.89926	59.26254	1
PR	Vitamins	Biotin HMP	down	-	mono	mono	17.40086	67.836429999999993	55.43915	1
PR	Vitamins	Biotin synthesis & utilization	-	up	poly	poly	1052.06125	1872.83931	1179.51581	1
PR	Vitamins	Biotin synthesis & utilization	up	-	mono	mono	9945.545810000001	2926.72347	5444.50731	2
PR	Vitamins	CbiZ Main	-	up	poly	poly	116.74470000000001	758.96268	128.08356	4
PR	Vitamins	CoA Pantothenate HMP	-	up	poly	poly	251.12739999999997	1100.33536	390.94163000000003	2
PR	Vitamins	coA-FolK	-	up	poly	poly	216.33171	337.61121	113.74585	1
PR	Vitamins	Cobalamin Biosynthesis	-	up	poly	poly	6.33536	21.57753	1.91169	1
PR	Vitamins	Cobalamin synthesis	up	-	mono	mono	96.23892	38.72362	10.51432	2
PR	Vitamins	Coenzyme A Biosynthesis	up	-	mono	mono	333.31845	25.70698	9.55847	1
PR	Vitamins	Coenzyme F420 synthesis	down	-	mono	mono	16.43914	66.08819	151.0239	1
PR	Vitamins	Coenzyme PQQ synthesis	-	down	poly	poly	1704.05286	644.1784	3043.41841	2
PR	Vitamins	Coenzyme PQQ synthesis	down	-	mono	mono	3.44425	21.59853	28.67542	1
PR	Vitamins	dcernst CoA Salvage2	-	up	poly	poly	209.27267	559.85216	227.49169999999998	2
PR	Vitamins	Experimental ThMP RZ	-	up	poly	poly	174.83279	902.21879	279.10747	1
PR	Vitamins	Experimental tye	-	up	poly	poly	240.75739	1670.56131	260.94636	2
PR	Vitamins	Experimental tye	up	-	mono	mono	406.48676	205.34852	216.97738	2
PR	Vitamins	Fe-S cluster assembly	down	-	mono	mono	129.7082	257.35211	405.27934	1
PR	Vitamins	Fe-S cluster assembly	up	down	monoUP-polyDOWN	mixed	4133.26362	300.93381	1572.3691199999998	3
PR	Vitamins	Folate Biosynthesis	-	up	poly	poly	1671.66933	6906.850710000001	2714.60687	7
PR	Vitamins	Folate biosynthesis in plants	up	up	UPcore	core	309.82525	481.53497	169.18501	1
PR	Vitamins	Folate HMP	up	-	mono	mono	436.95025	114.65129	108.01077	1
PR	Vitamins	Folate Tryp Chlamydiae	-	up	poly	poly	310.72308	837.66721	304.91535	1
PR	Vitamins	Folate Tryp Chlamydiae	up	up	UPcore	core	195.96221	410.77269	135.73034	1
PR	Vitamins	Heme Biosynthesis: protoporphyrin- and coproporphyrin-dependent pathways	-	up	poly	poly	751.23946	2071.37053	985.47876	2
PR	Vitamins	Heme Biosynthesis: protoporphyrin- and coproporphyrin-dependent pathways	up	up	UPcore	core	1573.69727	875.26323	347.92849	2
PR	Vitamins	Lipoate transport	up	-	mono	mono	28.45391	16.59413	0.95585	1
PR	Vitamins	Lipoic acid metabolism	up	-	mono	mono	179.01932	20.54025	73.60026	1
PR	Vitamins	Menaquinone biosynthesis from chorismate via 1,4-dihydroxy-2-naphthoate	-	up	poly	poly	71.51531	534.6995	132.8628	1
PR	Vitamins	Menaquinone Biosynthesis via Futalosine	-	up	poly	poly	340.44116	552.06858	297.26857	1
PR	Vitamins	Methanofuran erick jmorales	up	down	monoUP-polyDOWN	mixed	2163.60232	204.47556	450.20417	1
PR	Vitamins	Molybdenum cofactor biosynthesis	down	down	DOWNcore	core	157.9792	176.47704	343.14925	1
PR	Vitamins	Molybdenum cofactor biosynthesis ADH	up	-	mono	mono	99.08712	18.10671	12.42602	1
PR	Vitamins	Molybdopterin cytosine dinucleotide	up	-	mono	mono	946.28324	6.8743	7.64678	1
PR	Vitamins	Molybdopterin cytosine dinucleotide	up	down	monoUP-polyDOWN	mixed	1294.81668	20.69591	259.99052	1
PR	Vitamins	NAD and NADP cofactor biosynthesis global	-	down	poly	poly	891.8134	463.96222	1380.24378	1
PR	Vitamins	NAD and NADP cofactor biosynthesis global	-	up	poly	poly	511.9581	2897.36832	713.06222	5
PR	Vitamins	NAD and NADP cofactor biosynthesis global	up	-	mono	mono	829.3544999999999	203.21563	316.38552000000004	2
PR	Vitamins	NAD consumption	-	up	poly	poly	327.23025	1245.55171	455.93925	1
PR	Vitamins	NAD Niacin HMP	-	up	poly	poly	124.65144	504.1791	181.61102	1
PR	Vitamins	NAD Niacin HMP	up	-	mono	mono	152.24931	13.35196	0	1
PR	Vitamins	NAD regulation	-	up	poly	poly	214.58958	623.00417	222.71247	1
PR	Vitamins	NAD regulation	up	up	UPcore	core	174.91207	273.49559	25.80788	1
PR	Vitamins	NADH-dependent reduced ferredoxin:NADDP+ oxidoreductase	up	-	mono	mono	15206.5507	2059.83282	4926.43798	1
PR	Vitamins	Phylloquinone biosynthesis in plants	-	up	poly	poly	31.44387	332.08717	73.60026	1
PR	Vitamins	Plastoquinone biosynthesis in plants	-	up	poly	poly	446.9492	1544.47494	361.31035	1
PR	Vitamins	Pterin metabolism	up	up	UPcore	core	134.63712	77.02661	22.94034	1
PR	Vitamins	Pterin metabolism 3	-	up	poly	poly	430.68476	2012.59628	698.72451	2
PR	Vitamins	Pyridoxin (Vitamin B6) Biosynthesis	-	up	poly	poly	937.5085	2960.95297	1420.38937	1
PR	Vitamins	Pyridoxin (Vitamin B6) Biosynthesis	down	-	mono	mono	24.68071	45.55727	164.40577	1
PR	Vitamins	Pyridoxin (Vitamin B6) Biosynthesis	up	-	mono	mono	137.09693	30.57739	49.70407	1
PR	Vitamins	Pyridoxin HMP	-	up	poly	poly	300.64604	532.67394	301.09196	1
PR	Vitamins	Queuosine HMP	-	up	poly	poly	663.27008	3355.56517	1319.06954	3
PR	Vitamins	Queuosine HMP	down	down	DOWNcore	core	96.42477	64.43061	368.00128	1
PR	Vitamins	Quinones biosynthesis HGM	-	up	poly	poly	78.83399	719.3631	183.52272	2
PR	Vitamins	Riboflavin, FMN and FAD metabolism Extended	-	up	poly	poly	195.91456	420.65884	246.60865	1
PR	Vitamins	Riboflavin, FMN and FAD metabolism Extended	down	up	monoDOWN-polyUP	mixed	24.40227	401.96149	98.45229	1
PR	Vitamins	Riboflavin, FMN and FAD metabolism Extended	up	up	UPcore	core	173.21367	185.02392	66.90932	1
PR	Vitamins	Test - DHFR	-	up	poly	poly	857.54141	3884.88261	1147.01699	1
PR	Vitamins	Test - DHFR	down	-	mono	mono	736.93824	746.19002	1357.30344	1
PR	Vitamins	Test - DHFR	up	-	mono	mono	1179.69784	429.48571	209.3306	1
PR	Vitamins	Test - Folate	-	up	poly	poly	105.06193	481.83595	129.99526	1
PR	Vitamins	Test - Folate	up	-	mono	mono	444.60925	232.95173	116.61339	1
PR	Vitamins	Test - Folate	up	down	monoUP-polyDOWN	mixed	625.60988	6.26434	18.1611	1
PR	Vitamins	Test - Thiamin	up	-	mono	mono	80.67164	34.55751	12.42602	1
PR	Vitamins	Test Pyridoxin B6	-	up	poly	poly	531.02344	2236.11253	977.8319899999999	2
PR	Vitamins	Thiamin biosynthesis	-	up	poly	poly	178.01632	1447.06177	344.1051	1
PR	Vitamins	Thiamin biosynthesis LDP	up	-	mono	mono	150.76618	4.94674	10.51432	1
PR	Vitamins	Thiamin Copy RZ	-	up	poly	poly	6.2081	177.19066	6.69093	1
PR	Vitamins	Thiamine-biosynthesis	-	down	poly	poly	3850.61567	1065.16189	2556.89204	1
PR	Vitamins	Thiamine-biosynthesis	-	up	poly	poly	184.49849	1751.17938	427.26383	1
PR	Vitamins	Thiamine-biosynthesis	down	-	mono	mono	92.28152	112.78906	333.59077	1
PR	Vitamins	Ubiquinone biosynthesis -- gjo	up	-	mono	mono	2430.8867999999998	1114.01631	877.468	2
PR	Vitamins	YgfZ	-	up	poly	poly	4366.13209	9255.15834	4397.85432	7
PR	Vitamins	YgfZ	down	-	mono	mono	249.5112	678.66924	746.51689	1
PR	Vitamins	YgfZ	down	down	DOWNcore	core	2022.01241	781.43615	4609.09661	1
PR	Vitamins	YgfZ	up	-	mono	mono	12682.93894	3933.83808	2992.7585	7
PR	Vitamins	YgfZ	up	down	monoUP-polyDOWN	mixed	378.82565	65.2469	202.63967	1
PR	Vitamins	YgfZ	up	up	UPcore	core	702.15101	708.11869	257.12298	1
CH	Amino Acids	Alanine biosynthesis	down	-	mono	mono	5.62092	118.07598	47.41966	1
CH	Amino Acids	Alanine, serine, glycine metabolism in plants	-	down	poly	poly	367.08084	163.4054	633.45163	1
CH	Amino Acids	Alanine, serine, glycine metabolism in plants	down	-	mono	mono	246.19024	447.40802	1152.59574	1
CH	Amino Acids	Alanine, serine, glycine metabolism in plants	down	down	DOWNcore	core	12.85212	14.1576	94.42113	1
CH	Amino Acids	Amino acid racemase	-	up	poly	poly	126.33947	902.63891	141.25901	1
CH	Amino Acids	Amino acid racemase	up	-	mono	mono	674.75221	60.48681	28.93177	1
CH	Amino Acids	Arginine and Ornithine Degradation	-	down	poly	poly	109.32591	14.38025	84.30786	2
CH	Amino Acids	Arginine and Ornithine Degradation	down	-	mono	mono	3.66571	31.84334	51.07958	2
CH	Amino Acids	Arginine and Ornithine Degradation	down	down	DOWNcore	core	39.49773	66.57193	691.64005	1
CH	Amino Acids	Arginine and Ornithine Degradation	up	-	mono	mono	1748.4132	380.3495	289.57682	3
CH	Amino Acids	Arginine and Ornithine Degradation	up	down	monoUP-polyDOWN	mixed	184.86461	11.34415	70.72998	1
CH	Amino Acids	Arginine and Ornithine Degradation	up	up	UPcore	core	2866.8087	1776.25226	59.436	6
CH	Amino Acids	Arginine Biosynthesis extended	-	up	poly	poly	196.99606	504.25912	199.62757	1
CH	Amino Acids	Arginine Biosynthesis extended	down	-	mono	mono	0	0.74005	1.72953	1
CH	Amino Acids	Arginine Biosynthesis extended	up	up	UPcore	core	209.64213	234.5785	111.37029	1
CH	Amino Acids	Arginine deiminase and agmatine deiminase pathways in Streptococci	-	up	poly	poly	106.27396	1232.48389	246.72209	1
CH	Amino Acids	Arginine deiminase and agmatine deiminase pathways in Streptococci	down	-	mono	mono	98.4374	428.48029	460.24913000000004	2
CH	Amino Acids	Arginine metabolism and urea cycle in plants	down	down	DOWNcore	core	533.13573	1345.2017700000001	4262.50487	2
CH	Amino Acids	Arginine metabolism and urea cycle in plants	up	up	UPcore	core	2445.61697	2029.22737	532.07647	1
CH	Amino Acids	Aromatic amino acid degradation	-	down	poly	poly	160.97156999999999	54.56303	205.56324	3
CH	Amino Acids	Aromatic amino acid degradation	-	up	poly	poly	9.82246	96.92906	27.66883	1
CH	Amino Acids	Aromatic amino acid degradation	down	-	mono	mono	17.8608	116.77728	113.22037	1
CH	Amino Acids	Aromatic amino acid degradation	down	down	DOWNcore	core	7.44798	12.98017	75.65284	2
CH	Amino Acids	Aromatic amino acid degradation	up	-	mono	mono	36.19195	10.21355	7.13546	2
CH	Amino Acids	Aromatic amino acid degradation	up	down	monoUP-polyDOWN	mixed	73.08925	0.87809	19.34538	1
CH	Amino Acids	Aromatic amino acid degradation	up	up	UPcore	core	1127.4137700000001	1788.22326	222.2484	1
CH	Amino Acids	Aromatic amino acid interconversions with aryl acids	-	down	poly	poly	22.25336	0	7.05784	1
CH	Amino Acids	Aromatic amino acid interconversions with aryl acids	down	-	mono	mono	0	3.40134	4.85712	1
CH	Amino Acids	Branched chain amino acid degradation regulons	-	up	poly	poly	199.05509999999998	660.6778999999999	98.99421	3
CH	Amino Acids	Branched chain amino acid degradation regulons	up	up	UPcore	core	2382.90822	3338.1125899999997	682.22588	2
CH	Amino Acids	Branched-Chain Amino Acid Biosynthesis	down	-	mono	mono	491.37823	1073.79718	2262.9684700000003	2
CH	Amino Acids	Branched-Chain Amino Acid Biosynthesis	down	down	DOWNcore	core	300.29380000000003	781.83601	2808.49516	3
CH	Amino Acids	Branched-chain amino acid metabolism in plants	-	up	poly	poly	728.75741	1501.83595	301.04348	1
CH	Amino Acids	Chorismate biosynthesis in plants	down	-	mono	mono	79.0429	254.15325	338.40192	1
CH	Amino Acids	Chorismate biosynthesis in Streptococci	up	-	mono	mono	773.9358	367.5108	315.67233	1
CH	Amino Acids	Chorismate biosynthesis in Streptococci	up	up	UPcore	core	1071.20934	776.93365	375.77414	2
CH	Amino Acids	Chorismate Synthesis	down	-	mono	mono	3.4519100000000003	7.27473	34.7331	2
CH	Amino Acids	Chorismate Synthesis	up	up	UPcore	core	288.78554	544.51469	63.84838	1
CH	Amino Acids	Cinnamic Acid Degradation	up	-	mono	mono	29.84287	1.48009	0.31413	1
CH	Amino Acids	Common Pathway For Synthesis of Aromatic Compounds (DAHP synthase to chorismate)	down	-	mono	mono	354.36783	1313.75994	1514.03341	3
CH	Amino Acids	Common Pathway For Synthesis of Aromatic Compounds (DAHP synthase to chorismate)	up	-	mono	mono	1331.34471	79.99673	129.7084	2
CH	Amino Acids	Common Pathway For Synthesis of Aromatic Compounds (DAHP synthase to chorismate)	up	up	UPcore	core	281.06659	760.07758	5.65978	1
CH	Amino Acids	Creatine and Creatinine Degradation	down	-	mono	mono	1.17083	0.68122	7.44959	1
CH	Amino Acids	Creatine and Creatinine Degradation	down	down	DOWNcore	core	62.849320000000006	23.845860000000002	764.09418	2
CH	Amino Acids	Cyanophycin Metabolism	-	up	poly	poly	117.78133	1143.41965	140.324	1
CH	Amino Acids	Cysteine Biosynthesis	-	down	poly	poly	136.22286	83.36618	305.76452	1
CH	Amino Acids	Cysteine Biosynthesis	-	up	poly	poly	32.16216	364.92688	64.40447	1
CH	Amino Acids	Cysteine Biosynthesis	down	-	mono	mono	98.91836	454.58237	823.10529	4
CH	Amino Acids	Cysteine Biosynthesis	down	down	DOWNcore	core	554.35682	651.3412900000001	3787.59998	2
CH	Amino Acids	Cysteine Biosynthesis	up	up	UPcore	core	356.10206	91.67806	24.90013	1
CH	Amino Acids	Cysteine Biosynthesis, MCB 432	down	-	mono	mono	155.01232	385.67658	1102.05614	1
CH	Amino Acids	Cysteine Biosynthesis, MCB 432	down	down	DOWNcore	core	86.73534	343.72154	1182.44649	1
CH	Amino Acids	Cysteine Biosynthesis, MCB 432	up	-	mono	mono	2894.01971	202.22316999999998	266.18533	2
CH	Amino Acids	Evolution of Proline Biosynthesis (for review by Fichman et al)	up	-	mono	mono	839.51881	234.19165	357.07792	1
CH	Amino Acids	Glutamate dehydrogenases	down	-	mono	mono	75.28193	371.90022	520.06386	1
CH	Amino Acids	Glutamate dehydrogenases	up	up	UPcore	core	11858.81211	6394.38042	441.73087	1
CH	Amino Acids	Glutamine synthetases	down	-	mono	mono	36.9486	614.04483	462.06111	1
CH	Amino Acids	Glutamine synthetases	down	down	DOWNcore	core	770.26475	752.18887	3603.63616	1
CH	Amino Acids	Glutamine, Glutamate, Aspartate and Asparagine Biosynthesis	-	down	poly	poly	23.87865	10.45928	87.65460999999999	2
CH	Amino Acids	Glutamine, Glutamate, Aspartate and Asparagine Biosynthesis	down	-	mono	mono	832.77006	3335.3890899999997	6368.1174900000005	3
CH	Amino Acids	Glutamine, Glutamate, Aspartate and Asparagine Biosynthesis	down	down	DOWNcore	core	494.95878999999996	568.7255700000001	1923.37031	3
CH	Amino Acids	Glutamine, Glutamate, Aspartate and Asparagine Biosynthesis	up	-	mono	mono	188.71596	50.79129	58.22051	1
CH	Amino Acids	Glutamine, Glutamate, Aspartate and Asparagine Biosynthesis	up	down	monoUP-polyDOWN	mixed	2080.65148	50.97584	303.40873	1
CH	Amino Acids	Glutamine, Glutamate, Aspartate and Asparagine Biosynthesis	up	up	UPcore	core	447.03696	111.35379	45.71936	1
CH	Amino Acids	Glutamine, glutamate, aspartate, asparagine metabolism in plants	-	up	poly	poly	1233.56897	6889.46797	2196.9077599999996	2
CH	Amino Acids	Glutamine, glutamate, aspartate, asparagine metabolism in plants	down	-	mono	mono	477.30439	2150.70668	2827.59223	2
CH	Amino Acids	Glutamine, glutamate, aspartate, asparagine metabolism in plants	down	down	DOWNcore	core	49.29678	69.17855	821.4762000000001	2
CH	Amino Acids	Glutamine, glutamate, aspartate, asparagine metabolism in plants	up	up	UPcore	core	1069.24855	822.06003	287.08765	2
CH	Amino Acids	Glycine and Serine Utilization	-	up	poly	poly	81.77916	370.9812	88.12389	1
CH	Amino Acids	Glycine and Serine Utilization	down	-	mono	mono	416.855	1451.7108400000002	2499.28652	2
CH	Amino Acids	Glycine and Serine Utilization	down	down	DOWNcore	core	5.02779	5.18033	47.04526	1
CH	Amino Acids	Glycine and Serine Utilization	up	-	mono	mono	127.50455	1.24479	0.2986	1
CH	Amino Acids	Glycine and Serine Utilization	up	up	UPcore	core	263.32619	426.09593	57.76579	1
CH	Amino Acids	Glycine cleavage system	-	up	poly	poly	13.18056	133.47889	30.91879	1
CH	Amino Acids	Glycine cleavage system	down	-	mono	mono	286.40233	696.46935	1325.89112	2
CH	Amino Acids	Glycine cleavage system	down	down	DOWNcore	core	0.54999	0	16.32186	1
CH	Amino Acids	Glycine cleavage system	up	up	UPcore	core	100.71694	194.63385	17.74368	1
CH	Amino Acids	Histidine Biosynthesis	down	-	mono	mono	19.91837	117.11472	165.10089	1
CH	Amino Acids	Histidine Biosynthesis in plants	-	down	poly	poly	590.42058	144.4416	899.2515500000001	2
CH	Amino Acids	Histidine Biosynthesis in Streptococci	-	down	poly	poly	123.74865	26.05463	349.77638	1
CH	Amino Acids	Histidine Biosynthesis in Streptococci	down	up	monoDOWN-polyUP	mixed	11.68043	142.6967	59.04789	1
CH	Amino Acids	Histidine Degradation	up	up	UPcore	core	61.31909	9.16515	0.59721	1
CH	Amino Acids	Histidine Degradation in Streptococci	down	down	DOWNcore	core	5.35623	4.3397	112.77841	1
CH	Amino Acids	Histidine Degradation in Streptococci	up	-	mono	mono	521.26773	43.127430000000004	34.46553	2
CH	Amino Acids	Histidine Degradation in Streptococci	up	up	UPcore	core	553.69263	548.96097	193.63814	3
CH	Amino Acids	HMG CoA Synthesis	-	up	poly	poly	76.64513	282.00209	137.29138	1
CH	Amino Acids	HMG-CoA	down	-	mono	mono	120.53966	639.86389	560.01937	1
CH	Amino Acids	Isoleucine degradation	-	up	poly	poly	30.99243	691.77687	25.13299	1
CH	Amino Acids	Isoleucine degradation	down	-	mono	mono	1031.13424	6545.90788	5235.77912	1
CH	Amino Acids	Isoleucine degradation	down	down	DOWNcore	core	2.73577	2.79571	28.26422	1
CH	Amino Acids	Isoleucine degradation	down	up	monoDOWN-polyUP	mixed	257.71125	7161.12701	1144.66239	1
CH	Amino Acids	Ketoisovalerate oxidoreductase	up	-	mono	mono	3408.15039	1858.72622	1337.95867	1
CH	Amino Acids	Khodge314 Isoleucine Biosynthesis	down	-	mono	mono	948.48257	1824.13089	2479.84558	1
CH	Amino Acids	L-2-amino-thiazoline-4-carboxylic acid-Lcysteine conversion	up	-	mono	mono	216.16519	21.58142	40.8312	1
CH	Amino Acids	Leucine Biosynthesis	down	-	mono	mono	592.01525	1936.35814	2189.30042	2
CH	Amino Acids	Leucine Degradation and HMG-CoA Metabolism	-	down	poly	poly	278.67207	104.27838	475.32513	1
CH	Amino Acids	Leucine Degradation and HMG-CoA Metabolism	-	up	poly	poly	0	42.25421	0	1
CH	Amino Acids	Leucine Degradation and HMG-CoA Metabolism	down	down	DOWNcore	core	25.125709999999998	23.97962	263.47863	2
CH	Amino Acids	Lysine Biosynthesis DAP Pathway	-	down	poly	poly	68.06888	14.06208	148.65752	1
CH	Amino Acids	Lysine Biosynthesis DAP Pathway	down	-	mono	mono	122.10347	236.3283	504.53279	1
CH	Amino Acids	Lysine biosynthesis in Streptococci	down	down	DOWNcore	core	445.698	459.25729	2164.49535	1
CH	Amino Acids	Lysine biosynthesis in Streptococci	up	-	mono	mono	723.60712	113.83603	186.64881	1
CH	Amino Acids	Lysine degradation	-	down	poly	poly	30.60425	1.81168	15.87443	1
CH	Amino Acids	Lysine degradation	down	-	mono	mono	25.49637	174.39873	151.6956	2
CH	Amino Acids	Lysine fermentation	down	-	mono	mono	45.99301	320.04894	193.41629	1
CH	Amino Acids	Lysine fermentation	down	down	DOWNcore	core	14.00632	11.97799	93.95271	1
CH	Amino Acids	Lysine fermentation	up	-	mono	mono	22565.290350000003	7365.816720000001	6675.91835	2
CH	Amino Acids	Lysine fermentation MCB 432	down	-	mono	mono	293.35732	3285.71593	3364.02464	1
CH	Amino Acids	Methionine and cysteine metabolism in plants	-	up	poly	poly	11.22016	178.45217	17.98383	1
CH	Amino Acids	Methionine and cysteine metabolism in plants	down	down	DOWNcore	core	189.82684	201.55842	1583.81996	2
CH	Amino Acids	Methionine Biosynthesis	-	down	poly	poly	40.16542	4.56171	58.35294	1
CH	Amino Acids	Methionine Biosynthesis	-	up	poly	poly	17.89086	273.90567	27.64967	2
CH	Amino Acids	Methionine Biosynthesis	down	-	mono	mono	187.66927	407.67391	748.42999	2
CH	Amino Acids	Methionine Biosynthesis	down	down	DOWNcore	core	989.0409999999999	891.0908400000001	4567.6887	4
CH	Amino Acids	Methionine Degradation	up	-	mono	mono	1564.3975	740.42035	980.3776	1
CH	Amino Acids	Methionine Degradation	up	up	UPcore	core	154.94787	659.65582	15.42241	1
CH	Amino Acids	Methionine in Streptococci	up	up	UPcore	core	1164.50942	1810.6998099999998	645.51141	2
CH	Amino Acids	Methionine Salvage	down	-	mono	mono	8.14847	47.24483	61.82848	1
CH	Amino Acids	Methionine Salvage	down	down	DOWNcore	core	7.448830000000001	7.91563	80.54283000000001	2
CH	Amino Acids	Methionine Salvage	up	up	UPcore	core	622.66575	190.38749	4.52564	1
CH	Amino Acids	Phenylalanine and Tyrosine Branches from Chorismate	-	down	poly	poly	126.9274	2.81691	81.31444	1
CH	Amino Acids	Phenylalanine and Tyrosine Branches from Chorismate	down	-	mono	mono	7.90632	10.78535	56.71474	1
CH	Amino Acids	Phenylalanine and Tyrosine Branches from Chorismate	down	down	DOWNcore	core	9.41951	15.59374	197.16198	1
CH	Amino Acids	PII Superfamily	down	-	mono	mono	133.45035	599.9468400000001	1155.09716	4
CH	Amino Acids	Polyamine Metabolism	-	down	poly	poly	159.34698	15.4119	211.04948	1
CH	Amino Acids	Polyamine Metabolism	-	up	poly	poly	369.84623	1582.86061	730.78665	1
CH	Amino Acids	Polyamine Metabolism	down	-	mono	mono	10.232709999999999	53.76323	98.17323	3
CH	Amino Acids	Polyamine Metabolism	down	down	DOWNcore	core	174.15798	7.35442	677.70269	2
CH	Amino Acids	Polyamine Metabolism	up	-	mono	mono	6564.6559	1627.37274	1148.88033	4
CH	Amino Acids	Polyamine Metabolism	up	down	monoUP-polyDOWN	mixed	974.45215	19.4239	95.8831	2
CH	Amino Acids	Proline metabolism in plants	up	-	mono	mono	558.60508	119.64294	101.32641	1
CH	Amino Acids	Proline, 4-hydroxyproline uptake and utilization	-	up	poly	poly	19.35856	265.02091	51.25226	1
CH	Amino Acids	Proline, 4-hydroxyproline uptake and utilization	down	-	mono	mono	0.35485	1.92601	12.74867	1
CH	Amino Acids	Proline, 4-hydroxyproline uptake and utilization	down	down	DOWNcore	core	0	0	2.73583	1
CH	Amino Acids	Proline, 4-hydroxyproline uptake and utilization	up	-	mono	mono	767.87252	142.37548	84.34888000000001	3
CH	Amino Acids	Proline, 4-hydroxyproline uptake and utilization	up	up	UPcore	core	349.01824999999997	900.25037	20.47769	2
CH	Amino Acids	Putrescine utilization pathways	-	up	poly	poly	151.78812	1420.09224	31.14984	3
CH	Amino Acids	Putrescine utilization pathways	up	-	mono	mono	1927.60249	716.71603	126.25030000000001	2
CH	Amino Acids	Sarcosine oxidases, monomeric and heterotetrameric	-	down	poly	poly	202.81358	31.980269999999997	233.75426	2
CH	Amino Acids	Threonine degradation	-	down	poly	poly	14.58	8.97696	42.16074	1
CH	Amino Acids	Threonine degradation	down	-	mono	mono	11.87706	74.62365	63.61369	1
CH	Amino Acids	Threonine degradation	up	up	UPcore	core	503.49186	485.18722	103.55185	1
CH	Amino Acids	Tryptophan biosynthesis in Streptococci	-	down	poly	poly	90.5307	65.27751	238.82958	1
CH	Amino Acids	Tryptophan biosynthesis in Streptococci	up	up	UPcore	core	238.39217	206.02633	19.17461	1
CH	Amino Acids	Tryptophan catabolism	-	up	poly	poly	15.289	221.1416	17.90803	1
CH	Amino Acids	Tryptophan catabolism	down	-	mono	mono	46.385149999999996	173.70714	256.58705	3
CH	Amino Acids	Tryptophan catabolism	down	down	DOWNcore	core	6.37421	13.98461	249.74005	1
CH	Amino Acids	Tryptophan metabolism in plants	up	-	mono	mono	1498.92241	473.16193	502.96119	1
CH	Amino Acids	Tryptophan synthesis	-	down	poly	poly	117.60414	2.22014	19.25951	1
CH	Amino Acids	Urea decomposition	-	down	poly	poly	0.39028	0	3.41249	1
CH	Amino Acids	Urea decomposition	down	down	DOWNcore	core	53.76553	39.96008	227.76587	1
CH	Amino Acids	Urea decomposition	up	-	mono	mono	74.75412	0	2.5459	1
CH	Amino Acids	Valine degradation	-	up	poly	poly	412.52131	884.55064	211.94434	1
CH	Amino Acids	Valine degradation	up	-	mono	mono	2932.05482	1103.7057	267.08565	1
CH	Amino Acids	Valine degradation	up	up	UPcore	core	115.8044	275.61022	24.26641	1
CH	Arabinose Sensor and transport module	An Arabinose Sensor	up	-	mono	mono	276.82493999999997	1.05124	2.45275	2
CH	Carbohydrates	2-methylcitrate to 2-methylaconitate metabolism cluster	down	down	DOWNcore	core	0	0	5.46985	1
CH	Carbohydrates	Acetoin, butanediol metabolism	down	-	mono	mono	965.15604	1869.29228	2590.0060200000003	2
CH	Carbohydrates	Acetoin, butanediol metabolism	down	down	DOWNcore	core	5.57024	2.04698	54.6154	1
CH	Carbohydrates	Acetoin, butanediol metabolism	up	-	mono	mono	184.39447	28.66946	9.648489999999999	2
CH	Carbohydrates	Acetone Butanol Ethanol Synthesis	down	down	DOWNcore	core	14.00632	11.97799	93.95271	1
CH	Carbohydrates	Acetyl-CoA fermentation to Butyrate	down	-	mono	mono	1031.13424	6545.90788	5235.77912	1
CH	Carbohydrates	Acetyl-CoA fermentation to Butyrate	up	-	mono	mono	22565.290350000003	7365.816720000001	6675.91835	2
CH	Carbohydrates	acinetobacter tca	-	up	poly	poly	1207.94698	6608.69545	2180.48269	1
CH	Carbohydrates	acinetobacter tca	up	-	mono	mono	3710.94347	1254.98629	1134.13161	1
CH	Carbohydrates	alpha carboxysome	down	-	mono	mono	61.83525	202.4373	338.82836	2
CH	Carbohydrates	alpha carboxysome	down	down	DOWNcore	core	144.1414	160.16154	1402.07934	2
CH	Carbohydrates	beta carboxysome	down	-	mono	mono	25.71556	131.60533	275.81179	1
CH	Carbohydrates	Beta-Glucoside Metabolism	-	up	poly	poly	12.23153	185.71499	48.24792	1
CH	Carbohydrates	Beta-Glucoside Metabolism	down	-	mono	mono	5.77742	71.26429	37.84333	1
CH	Carbohydrates	Butanol Biosynthesis	-	down	poly	poly	39.7565	36.8713	131.72197	1
CH	Carbohydrates	Calvin-Benson cycle	-	up	poly	poly	2.25813	30.93159	0.94239	1
CH	Carbohydrates	Calvin-Benson cycle	down	-	mono	mono	326.05697	550.17495	939.14086	1
CH	Carbohydrates	Calvin-Benson cycle	down	down	DOWNcore	core	0.72064	0	1.60351	1
CH	Carbohydrates	Calvin-Benson-Bassham cycle in plants	down	-	mono	mono	0.53775	7.427	4.3704	1
CH	Carbohydrates	Carboxysome	down	-	mono	mono	90.49451	331.11418	406.5193	1
CH	Carbohydrates	Carboxysome	up	-	mono	mono	376.86176	113.02886	185.23705	1
CH	Carbohydrates	Carboxysome	up	up	UPcore	core	80.36217	69.95816	12.84182	1
CH	Carbohydrates	Chitin and N-acetylglucosamine utilization	-	down	poly	poly	302.79834	24.701	143.93657	1
CH	Carbohydrates	Chitin and N-acetylglucosamine utilization	-	up	poly	poly	152.85207	1284.84437	180.23103	4
CH	Carbohydrates	Chitin and N-acetylglucosamine utilization	up	-	mono	mono	74.4903	0.62239	3.64718	2
CH	Carbohydrates	Chitin and N-acetylglucosamine utilization	up	up	UPcore	core	61.09858	118.83476999999999	3.6006	2
CH	Carbohydrates	Citrate Metabolism KE	up	up	UPcore	core	1044.40296	1826.82566	348.08951	1
CH	Carbohydrates	Citrate Metabolism KE3	down	down	DOWNcore	core	651.9173400000001	377.70153	3085.1464300000002	2
CH	Carbohydrates	Citrate Metabolism KE3	up	up	UPcore	core	1338.50526	1511.28693	334.13637	1
CH	Carbohydrates	CO2 uptake, carboxysome	down	down	DOWNcore	core	1.7933499999999998	0.87809	14.85079	2
CH	Carbohydrates	D-galactarate, D-glucarate and D-glycerate catabolism	-	down	poly	poly	42.3733	1.28622	29.56549	1
CH	Carbohydrates	D-galactarate, D-glucarate and D-glycerate catabolism - gjo	-	down	poly	poly	3.0623	1.75617	13.45637	1
CH	Carbohydrates	D-galactarate, D-glucarate and D-glycerate catabolism - gjo	up	-	mono	mono	823.09799	3.21256	15.0617	2
CH	Carbohydrates	D-galactarate, D-glucarate and D-glycerate catabolism - gjo	up	up	UPcore	core	502.58444	611.72304	242.10703	1
CH	Carbohydrates	D-galactonate catabolism	up	-	mono	mono	1045.12341	194.27992999999998	14.93023	4
CH	Carbohydrates	D-Galacturonate and D-Glucuronate Utilization	-	down	poly	poly	2.53828	1.61481	15.20966	1
CH	Carbohydrates	D-Galacturonate and D-Glucuronate Utilization	-	up	poly	poly	2.2227	4.29922	0.31413	1
CH	Carbohydrates	D-Galacturonate and D-Glucuronate Utilization	up	-	mono	mono	549.02479	76.83892	62.05857	2
CH	Carbohydrates	D-Galacturonate and D-Glucuronate Utilization	up	up	UPcore	core	403.00597	834.3326	91.9885	2
CH	Carbohydrates	D-gluconate and ketogluconates metabolism	down	down	DOWNcore	core	0.74877	2.04698	20.59365	1
CH	Carbohydrates	D-gluconate and ketogluconates metabolism	up	-	mono	mono	560.97146	1.48009	4.36858	2
CH	Carbohydrates	D-gluconate and ketogluconates metabolism	up	down	monoUP-polyDOWN	mixed	170.38066	1.13378	6.77476	1
CH	Carbohydrates	D-ribose utilization	up	down	monoUP-polyDOWN	mixed	813.93673	8.578800000000001	45.02719	2
CH	Carbohydrates	D-ribose utilization	up	up	UPcore	core	10.92264	11.83973	1.22547	1
CH	Carbohydrates	Dehydrogenase complexes	-	down	poly	poly	1.97356	0	5.65796	1
CH	Carbohydrates	Dehydrogenase complexes	-	up	poly	poly	728.75741	1501.83595	301.04348	1
CH	Carbohydrates	Dehydrogenase complexes	down	-	mono	mono	120.53966	639.86389	560.01937	1
CH	Carbohydrates	Dehydrogenase complexes	up	-	mono	mono	2932.05482	1103.7057	267.08565	1
CH	Carbohydrates	Deoxyribose and Deoxynucleoside Catabolism	-	up	poly	poly	89.95939000000001	523.97837	148.43836	2
CH	Carbohydrates	Deoxyribose and Deoxynucleoside Catabolism	down	-	mono	mono	36.17985	365.47464	225.93113	1
CH	Carbohydrates	Deoxyribose and Deoxynucleoside Catabolism	down	up	monoDOWN-polyUP	mixed	13.47829	124.80957	43.22368	1
CH	Carbohydrates	Deoxyribose and Deoxynucleoside Catabolism	up	-	mono	mono	2007.60532	74.48273999999999	181.65926	2
CH	Carbohydrates	Deoxyribose and Deoxynucleoside Catabolism	up	down	monoUP-polyDOWN	mixed	107.42994	2.15751	15.56213	1
CH	Carbohydrates	Deoxyribose and Deoxynucleoside Catabolism	up	up	UPcore	core	161.87389	809.45212	16.58396	2
CH	Carbohydrates	Entner-Doudoroff Pathway	-	down	poly	poly	463.48699	37.33807	460.77973	2
CH	Carbohydrates	Entner-Doudoroff Pathway	-	up	poly	poly	159.13184	645.96486	204.26553	2
CH	Carbohydrates	Entner-Doudoroff Pathway	down	-	mono	mono	5.70936	40.59958	52.25119	1
CH	Carbohydrates	Entner-Doudoroff Pathway	down	up	monoDOWN-polyUP	mixed	6.93558	103.46244	32.09769	1
CH	Carbohydrates	Entner-Doudoroff Pathway	up	-	mono	mono	382.91214	64.42452	45.05	3
CH	Carbohydrates	Ethanolamine utilization	-	down	poly	poly	44.23134	1.70115	25.63888	1
CH	Carbohydrates	Ethanolamine utilization	up	-	mono	mono	174.74148	14.27213	8.07967	1
CH	Carbohydrates	Ethylmalonyl-CoA pathway of C2 assimilation	down	-	mono	mono	45.99301	320.04894	193.41629	1
CH	Carbohydrates	Ethylmalonyl-CoA pathway of C2 assimilation, GJO	-	up	poly	poly	68.89595	9053.31445	76.00166	1
CH	Carbohydrates	Fermentations in Streptococci	down	-	mono	mono	133.23842	1102.85219	1689.33261	1
CH	Carbohydrates	Fermentations in Streptococci	down	down	DOWNcore	core	95.42848	596.17573	1466.47539	1
CH	Carbohydrates	Fermentations: Lactate	-	up	poly	poly	15.289	221.1416	17.90803	1
CH	Carbohydrates	Fermentations: Mixed acid	down	down	DOWNcore	core	6.37421	13.98461	249.74005	1
CH	Carbohydrates	Folate-mediated one-carbon metabolism in plants	-	down	poly	poly	178.99267	40.14576	162.16957	1
CH	Carbohydrates	Folate-mediated one-carbon metabolism in plants	down	-	mono	mono	531.65621	1606.30483	2256.5407099999998	3
CH	Carbohydrates	Folate-mediated one-carbon metabolism in plants	down	down	DOWNcore	core	46.40608	41.39688	182.49489	1
CH	Carbohydrates	Folate-mediated one-carbon metabolism in plants	up	up	UPcore	core	123.58215	135.18413	68.14757	1
CH	Carbohydrates	Formaldehyde assimilation: Ribulose monophosphate pathway	-	down	poly	poly	1.15311	0	5.23334	1
CH	Carbohydrates	Formaldehyde assimilation: Ribulose monophosphate pathway	-	up	poly	poly	1241.66355	2075.22209	996.11076	1
CH	Carbohydrates	Fructooligosaccharides(FOS) and Raffinose Utilization	up	-	mono	mono	190.96325	5.49054	0.44014	2
CH	Carbohydrates	Fructose utilization	up	-	mono	mono	3884.1383100000003	17.19588	31.312359999999998	4
CH	Carbohydrates	Galactose degradation in plants	-	up	poly	poly	9.72157	126.85509	5.70453	1
CH	Carbohydrates	Galactose degradation in plants	up	up	UPcore	core	72.20812	48.38552	3.53668	1
CH	Carbohydrates	Glycerol and Glycerol-3-phosphate Uptake and Utilization	-	down	poly	poly	5.4773	2.26756	17.72633	2
CH	Carbohydrates	Glycerol and Glycerol-3-phosphate Uptake and Utilization	-	up	poly	poly	21.90028	113.53941	21.61002	1
CH	Carbohydrates	Glycerol and Glycerol-3-phosphate Uptake and Utilization	up	-	mono	mono	3399.71525	26.30124	164.40794	1
CH	Carbohydrates	Glycerol and Glycerol-3-phosphate Uptake and Utilization	up	down	monoUP-polyDOWN	mixed	3159.76724	15.380220000000001	256.41924	3
CH	Carbohydrates	Glycerol and Glycerol-3-phosphate Uptake and Utilization	up	up	UPcore	core	67.38544	70.20198	20.95435	1
CH	Carbohydrates	Glycogen metabolism	-	up	poly	poly	690.68363	1728.1198100000001	194.82049	2
CH	Carbohydrates	Glycogen metabolism	up	-	mono	mono	437.49128	393.47265	57.08359	1
CH	Carbohydrates	Glycolate, glyoxylate interconversions	-	down	poly	poly	16.79004	9.439630000000001	114.87036	5
CH	Carbohydrates	Glycolate, glyoxylate interconversions	up	-	mono	mono	183.38336	31.49997	63.54613	1
CH	Carbohydrates	Glycolysis and Gluconeogenesis	-	up	poly	poly	43.67319	523.80196	103.02307	1
CH	Carbohydrates	Glycolysis and Gluconeogenesis	down	down	DOWNcore	core	1.56043	1.21	36.38864	1
CH	Carbohydrates	Glycolysis and Gluconeogenesis	up	-	mono	mono	576.10947	175.23625	85.54876	1
CH	Carbohydrates	Glycolysis and Gluconeogenesis in plants	down	-	mono	mono	643.14289	1251.85822	2019.38448	1
CH	Carbohydrates	Glycolysis and Gluconeogenesis in plants	down	down	DOWNcore	core	4.68926	6.27866	35.92751	1
CH	Carbohydrates	Glycolysis and Gluconeogenesis in Streptococci	down	-	mono	mono	39.44608	293.85101	232.96711	1
CH	Carbohydrates	Glycolysis and Gluconeogenesis in Streptococci	up	-	mono	mono	3161.10896	2270.61863	1337.9834	1
CH	Carbohydrates	Glycolysis and Gluconeogenesis, including Archaeal enzymes	-	down	poly	poly	11.46058	3.53797	32.35154	1
CH	Carbohydrates	Glycolysis and Gluconeogenesis, including Archaeal enzymes	down	down	DOWNcore	core	14.34104	9.15503	220.36112	1
CH	Carbohydrates	Glycolysis test	-	up	poly	poly	222.07472	1118.61434	473.43758	1
CH	Carbohydrates	Glycolysis test	down	down	DOWNcore	core	0.35485	0	4.52746	1
CH	Carbohydrates	Glyoxylate bypass	-	down	poly	poly	62.01397	20.83663	194.54565	1
CH	Carbohydrates	Glyoxylate bypass	down	-	mono	mono	477.30439	2150.70668	2825.73851	1
CH	Carbohydrates	Hexose Phosphate Uptake System	-	down	poly	poly	5.92556	0	3.6764	1
CH	Carbohydrates	Inositol catabolism	up	-	mono	mono	1463.70284	99.98655000000001	77.94488	8
CH	Carbohydrates	Inositol catabolism	up	down	monoUP-polyDOWN	mixed	378.34988	24.43568	99.08371	2
CH	Carbohydrates	Isobutyryl-CoA to Propionyl-CoA Module	-	up	poly	poly	642.56884	2237.00541	336.07154	5
CH	Carbohydrates	Isobutyryl-CoA to Propionyl-CoA Module	down	-	mono	mono	293.35732	3285.71593	3364.02464	1
CH	Carbohydrates	Isobutyryl-CoA to Propionyl-CoA Module	up	up	UPcore	core	115.8044	275.61022	24.26641	1
CH	Carbohydrates	L-Arabinose CS	-	down	poly	poly	6.1653	1.86718	13.28378	1
CH	Carbohydrates	L-Arabinose CS	down	down	DOWNcore	core	4.5246	5.43521	45.02901	1
CH	Carbohydrates	L-Arabinose CS	up	-	mono	mono	298.85931	20.66207	3.1915	3
CH	Carbohydrates	L-Arabinose utilization	up	-	mono	mono	212.42759	4.24797	19.12621	1
CH	Carbohydrates	L-fucose utilization temp	-	down	poly	poly	9.33598	0	2.955	1
CH	Carbohydrates	L-rhamnose utilization	-	up	poly	poly	59.29743	455.47887	77.35496	1
CH	Carbohydrates	L-rhamnose utilization	up	-	mono	mono	1076.81749	52.60078	212.03739000000002	6
CH	Carbohydrates	L-rhamnose utilization	up	down	monoUP-polyDOWN	mixed	163.32551	0	13.24085	1
CH	Carbohydrates	L-rhamnose utilization	up	up	UPcore	core	22.47488	41.29009	0.28308	1
CH	Carbohydrates	Lactate utilization	-	down	poly	poly	46.6168	32.16725	238.05509	2
CH	Carbohydrates	Lactate utilization	-	up	poly	poly	0.72064	8.27332	0.28308	1
CH	Carbohydrates	Lactate utilization	down	-	mono	mono	0	5.6689	6.36566	1
CH	Carbohydrates	Lactate utilization	up	-	mono	mono	143.0908	1.24479	0.84924	1
CH	Carbohydrates	Lactate utilization temp	up	-	mono	mono	551.98481	43.99118	51.8375	1
CH	Carbohydrates	Lactate utilization temp	up	up	UPcore	core	728.07352	525.28436	188.75821	1
CH	Carbohydrates	Lactose and Galactose Uptake and Utilization	-	up	poly	poly	5.88859	82.61152	4.51012	1
CH	Carbohydrates	Malonate_	-	down	poly	poly	21.06498	3.70024	13.17147	1
CH	Carbohydrates	Malonate_	up	-	mono	mono	33.43994	0.74005	1.714	2
CH	Carbohydrates	Malonate_	up	down	monoUP-polyDOWN	mixed	25.71171	0	2.34226	1
CH	Carbohydrates	Maltose and Maltodextrin Utilization	-	up	poly	poly	5.81736	69.58585	3.06549	1
CH	Carbohydrates	Maltose and Maltodextrin Utilization	up	-	mono	mono	341.6819	57.28754	11.08124	2
CH	Carbohydrates	Maltose and Maltodextrin Utilization	up	down	monoUP-polyDOWN	mixed	150.53069	10.51304	43.41725	1
CH	Carbohydrates	Maltose and Maltodextrin Utilization	up	up	UPcore	core	259.59158	562.77973	10.98991	3
CH	Carbohydrates	Mannitol Utilization	-	up	poly	poly	0.98534	39.14535	2.64087	1
CH	Carbohydrates	Mannitol Utilization	down	down	DOWNcore	core	2.09991	2.06737	16.10912	1
CH	Carbohydrates	Mannitol Utilization	up	-	mono	mono	37.4115	9.18885	2.65639	1
CH	Carbohydrates	Mannose Metabolism	down	-	mono	mono	3.7911	5.37798	30.17094	1
CH	Carbohydrates	Mannose Metabolism	down	down	DOWNcore	core	12.15615	18.03051	130.89007999999998	2
CH	Carbohydrates	Mannose Metabolism	up	up	UPcore	core	763.80635	2403.32745	332.30103	1
CH	Carbohydrates	Methylcitrate cycle	-	up	poly	poly	409.22206	1949.14595	252.23122	3
CH	Carbohydrates	Methylcitrate cycle	up	-	mono	mono	3408.15039	1858.72622	1337.95867	1
CH	Carbohydrates	Methylcitrate cycle	up	down	monoUP-polyDOWN	mixed	456.91456	2.8596	89.32664	1
CH	Carbohydrates	Methylglyoxal Metabolism	-	up	poly	poly	160.44839	354.84039	118.53958	1
CH	Carbohydrates	Methylglyoxal Metabolism	up	-	mono	mono	616.9528700000001	175.55546	236.70111	2
CH	Carbohydrates	N-Acetyl-Galactosamine and Galactosamine Utilization	-	up	poly	poly	1.06454	29.6302	0.94239	1
CH	Carbohydrates	One-carbon metabolism by tetrahydropterines	down	-	mono	mono	68.7977	202.7443	298.31771	1
CH	Carbohydrates	One-carbon metabolism by tetrahydropterines	down	down	DOWNcore	core	58.36061	20.690550000000002	286.0548	1
CH	Carbohydrates	Pentose phosphate pathway	-	up	poly	poly	167.23654	378.47277	146.7554	1
CH	Carbohydrates	Pentose phosphate pathway	up	-	mono	mono	1393.05713	334.75984	335.11909000000003	1
CH	Carbohydrates	Pentose phosphate pathway in plants	down	down	DOWNcore	core	454.6611	500.83009	2154.81376	1
CH	Carbohydrates	Photorespiration (oxidative C2 cycle)	-	down	poly	poly	281.39517	105.52317	484.63026	2
CH	Carbohydrates	Photorespiration (oxidative C2 cycle)	down	-	mono	mono	0.72064	4.53512	10.04753	1
CH	Carbohydrates	Photorespiration (oxidative C2 cycle)	down	down	DOWNcore	core	22.52603	21.85151	175.7876	3
CH	Carbohydrates	Photorespiration (oxidative C2 cycle)	up	-	mono	mono	31511.645210000002	4377.78971	4175.26456	2
CH	Carbohydrates	Photorespiration (oxidative C2 cycle) in plants	down	down	DOWNcore	core	34.95574	60.02352	601.11508	1
CH	Carbohydrates	Photorespiration (oxidative C2 cycle) in plants	up	up	UPcore	core	341.17503	296.77567	98.32944	1
CH	Carbohydrates	Propanediol utilization	down	down	DOWNcore	core	10.44221	11.40774	53.71135	1
CH	Carbohydrates	Propionate-CoA to Succinate Module	-	up	poly	poly	802.43233	2542.09371	408.08803	2
CH	Carbohydrates	Propionate-CoA to Succinate Module	down	-	mono	mono	0.35485	1.98484	6.50538	1
CH	Carbohydrates	Propionyl-CoA to Succinyl-CoA Module	down	down	DOWNcore	core	102.5462	84.92883	760.97171	3
CH	Carbohydrates	Pyruvate Alanine Serine Interconversions	-	up	poly	poly	81.77916	370.9812	88.12389	1
CH	Carbohydrates	Pyruvate Alanine Serine Interconversions	down	-	mono	mono	16.26773	150.26976	136.83207	2
CH	Carbohydrates	Pyruvate Alanine Serine Interconversions	up	-	mono	mono	1090.71067	32.79912	85.59169	1
CH	Carbohydrates	Pyruvate Alanine Serine Interconversions	up	up	UPcore	core	263.32619	426.09593	57.76579	1
CH	Carbohydrates	Pyruvate metabolism I: anaplerotic reactions, PEP	-	up	poly	poly	41.75673	125.43418	30.03122	1
CH	Carbohydrates	Pyruvate metabolism I: anaplerotic reactions, PEP	down	-	mono	mono	981.04451	3226.87495	4333.6088899999995	2
CH	Carbohydrates	Pyruvate metabolism I: anaplerotic reactions, PEP	up	-	mono	mono	19.72722	0	0.31413	1
CH	Carbohydrates	Pyruvate metabolism I: anaplerotic reactions, PEP in Mycobacteria	-	down	poly	poly	464.77362	10.53645	316.4291	1
CH	Carbohydrates	Pyruvate metabolism I: anaplerotic reactions, PEP in Mycobacteria	-	up	poly	poly	14.37175	351.42521	20.02567	1
CH	Carbohydrates	Pyruvate metabolism I: anaplerotic reactions, PEP in Mycobacteria	down	down	DOWNcore	core	7.40439	4.61452	46.01614	1
CH	Carbohydrates	Pyruvate metabolism II: acetyl-CoA, acetogenesis from pyruvate	down	-	mono	mono	12.38129	97.44444	156.43130000000002	2
CH	Carbohydrates	Pyruvate metabolism II: acetyl-CoA, acetogenesis from pyruvate	up	-	mono	mono	1564.3975	740.42035	980.3776	1
CH	Carbohydrates	Pyruvate metabolism II: acetyl-CoA, acetogenesis from pyruvate	up	down	monoUP-polyDOWN	mixed	1020.48676	1.05124	8.20386	1
CH	Carbohydrates	Pyruvate metabolism II: acetyl-CoA, acetogenesis from pyruvate	up	up	UPcore	core	33.36166	364.62021	5.71824	1
CH	Carbohydrates	Pyruvate:ferredoxin oxidoreductase	down	down	DOWNcore	core	1.91595	1.13378	29.2276	1
CH	Carbohydrates	Serine-glyoxylate cycle	-	up	poly	poly	149.94031	5769.70746	143.1685	2
CH	Carbohydrates	Serine-glyoxylate cycle	down	-	mono	mono	283.64200000000005	920.7079600000001	2008.9269	2
CH	Carbohydrates	Serine-glyoxylate cycle	down	down	DOWNcore	core	204.36216	232.76835	2082.53431	3
CH	Carbohydrates	Serine-glyoxylate cycle	up	up	UPcore	core	589.0885499999999	778.98672	160.78253	2
CH	Carbohydrates	Starch biosynthesis in plants	up	up	UPcore	core	1542.03701	2142.87261	11.98069	1
CH	Carbohydrates	Starch degradation in plants	-	up	poly	poly	268.87483	720.8739	12.23272	1
CH	Carbohydrates	Sucrose utilization	up	-	mono	mono	239.95545	30.36834	29.91613	1
CH	Carbohydrates	Sucrose utilization Shewanella	-	up	poly	poly	0.90483	40.60565	3.99053	1
CH	Carbohydrates	Sucrose utilization Shewanella	up	up	UPcore	core	40.74823	39.815	3.53668	1
CH	Carbohydrates	Sugar utilization in Thermotogales	-	down	poly	poly	182.65206	48.94813	261.87607	2
CH	Carbohydrates	Sugar utilization in Thermotogales	down	-	mono	mono	0	2.26756	2.64087	1
CH	Carbohydrates	Sugar utilization in Thermotogales	up	-	mono	mono	1349.39951	87.52841	42.92143	6
CH	Carbohydrates	Sugar utilization in Thermotogales	up	down	monoUP-polyDOWN	mixed	463.07693	4.74576	65.29309	1
CH	Carbohydrates	Sugar utilization in Thermotogales	up	up	UPcore	core	342.26547	337.75033	23.49478	3
CH	Carbohydrates	TCA Cycle	-	down	poly	poly	1271.3712	59.23862	644.97475	1
CH	Carbohydrates	TCA Cycle	down	-	mono	mono	1392.6522	4097.40314	5066.60806	3
CH	Carbohydrates	TCA cycle in plants	-	down	poly	poly	859.17073	184.58127	1387.5563	1
CH	Carbohydrates	TCA cycle in plants	-	up	poly	poly	25.62199	280.77252	16.42507	1
CH	Carbohydrates	TCA cycle in plants	up	-	mono	mono	885.43959	157.4565	282.36738	1
CH	Carbohydrates	TCA cycle in plants	up	up	UPcore	core	418.00984	1525.96993	175.27166	1
CH	Carbohydrates	Trehalose Biosynthesis	-	down	poly	poly	11.12096	6.97572	93.29322	1
CH	Carbohydrates	Trehalose Uptake and Utilization	up	-	mono	mono	72.47737	6.69677	3.08101	1
CH	Carbohydrates	Xylose utilization	-	down	poly	poly	346.22986	17.09374	156.33364	2
CH	Carbohydrates	Xylose utilization	-	up	poly	poly	7.273390000000001	253.29667999999998	12.21173	2
CH	Carbohydrates	Xylose utilization	up	-	mono	mono	529.6343499999999	32.73454	22.1296	2
CH	Carbohydrates	Xylose utilization	up	up	UPcore	core	92.78058	3.76804	0	1
CH	Cell Division and Cell Cycle	Bacterial Cytoskeleton	-	up	poly	poly	223.51357	1513.50457	416.588	1
CH	Cell Division and Cell Cycle	Bacterial Cytoskeleton	down	down	DOWNcore	core	145.33557	142.93023	424.2786	1
CH	Cell Division and Cell Cycle	Bacterial Cytoskeleton	up	-	mono	mono	15656.913540000001	2869.75441	4401.98291	10
CH	Cell Division and Cell Cycle	Cyanobacterial Circadian Clock	down	-	mono	mono	0	0	3.6006	1
CH	Cell Division and Cell Cycle	Cyanobacterial Circadian Clock	up	up	UPcore	core	63.87847	128.62646	11.3625	1
CH	Cell Division and Cell Cycle	Macromolecular synthesis operon	down	-	mono	mono	777.8579599999999	1844.63486	3987.5375400000003	2
CH	Cell Division and Cell Cycle	Macromolecular synthesis operon	down	down	DOWNcore	core	854.3319	1956.6354900000001	7292.453079999999	3
CH	Cell Division and Cell Cycle	Two cell division clusters relating to chromosome partitioning	down	down	DOWNcore	core	79.95037	302.34577	973.30556	3
CH	Cell Division and Cell Cycle	Two cell division clusters relating to chromosome partitioning	up	-	mono	mono	2067.48115	529.34132	425.65749	1
CH	Cell Wall and Capsule	Alginate metabolism	-	down	poly	poly	2.53828	1.61481	15.20966	1
CH	Cell Wall and Capsule	Alginate metabolism	-	up	poly	poly	0.55546	8.78788	0	1
CH	Cell Wall and Capsule	Alginate metabolism	down	-	mono	mono	6.270529999999999	164.18000999999998	74.68218	2
CH	Cell Wall and Capsule	Capsular heptose biosynthesis	-	down	poly	poly	453.74406	195.29359	595.06086	2
CH	Cell Wall and Capsule	Capsular Polysaccharides Biosynthesis and Assembly	-	down	poly	poly	47.680119999999995	28.13532	464.18039	2
CH	Cell Wall and Capsule	dTDP-rhamnose synthesis	-	down	poly	poly	482.61505	249.04462999999998	731.01924	2
CH	Cell Wall and Capsule	Exopolysaccharide Biosynthesis	-	up	poly	poly	6.68807	132.1243	3.33304	1
CH	Cell Wall and Capsule	KDO2-Lipid A biosynthesis	down	-	mono	mono	261.18626	490.78953	862.90825	3
CH	Cell Wall and Capsule	KDO2-Lipid A biosynthesis	up	-	mono	mono	1451.63609	287.89865	522.3031	3
CH	Cell Wall and Capsule	KDO2-Lipid A biosynthesis	up	up	UPcore	core	184.10063	32.95531	3.97683	1
CH	Cell Wall and Capsule	linker unit-arabinogalactan synthesis	-	down	poly	poly	275.97305	93.85232	299.54126	1
CH	Cell Wall and Capsule	Lipid A modifications	down	-	mono	mono	4.26721	32.47591	38.79942	1
CH	Cell Wall and Capsule	Lipid A modifications	up	up	UPcore	core	22.07099	17.15507	1.96422	1
CH	Cell Wall and Capsule	Lipid A-Ara4N pathway ( Polymyxin resistance )	up	-	mono	mono	83.62713	15.8094	6.58482	1
CH	Cell Wall and Capsule	Lipopolysaccharide assembly	down	-	mono	mono	125.00115	177.43837	367.18764	1
CH	Cell Wall and Capsule	LOS core oligosaccharide biosynthesis	-	down	poly	poly	60.25885	3.76885	47.78401	1
CH	Cell Wall and Capsule	LOS core oligosaccharide biosynthesis	down	-	mono	mono	8.762129999999999	50.66671	88.93115	3
CH	Cell Wall and Capsule	LOS core oligosaccharide biosynthesis	up	-	mono	mono	326.18029	15.38627	20.09783	1
CH	Cell Wall and Capsule	LOS core oligosaccharide biosynthesis	up	up	UPcore	core	122.92868	481.06832000000003	7.6998	1
CH	Cell Wall and Capsule	Major Outer Membrane Proteins	-	up	poly	poly	43.58869	529.99996	34.0619	1
CH	Cell Wall and Capsule	Murein Hydrolases	up	up	UPcore	core	17.43231	221.71572	3.41067	1
CH	Cell Wall and Capsule	mycolic acid synthesis	down	-	mono	mono	1.11092	1.48009	33.57605	1
CH	Cell Wall and Capsule	mycolic acid synthesis	down	down	DOWNcore	core	73.44012	53.85778	793.85206	1
CH	Cell Wall and Capsule	O-Methyl Phosphoramidate Capsule Modification in Campylobacter	-	down	poly	poly	136.22286	83.36618	305.76452	1
CH	Cell Wall and Capsule	Peptidoglycan Biosynthesis	-	down	poly	poly	202.9845	47.07275	274.75249	1
CH	Cell Wall and Capsule	Peptidoglycan Biosynthesis	-	up	poly	poly	14.18138	82.58023	7.9226	1
CH	Cell Wall and Capsule	Peptidoglycan Biosynthesis	down	-	mono	mono	40.21136	637.31194	491.92156	2
CH	Cell Wall and Capsule	Peptidoglycan Biosynthesis	down	down	DOWNcore	core	805.22049	812.2123899999999	4204.75124	2
CH	Cell Wall and Capsule	Peptidoglycan Biosynthesis	up	-	mono	mono	1978.22576	865.60865	936.32403	4
CH	Cell Wall and Capsule	Perosamine Synthesis Vibrio	up	up	UPcore	core	763.80635	2403.32745	332.30103	1
CH	Cell Wall and Capsule	Phosphorylcholine incorporation in LPS	up	-	mono	mono	40.72319	0.62239	2.4838	1
CH	Cell Wall and Capsule	Rhamnose containing glycans	-	down	poly	poly	57.64475	17.32148	204.26707	1
CH	Cell Wall and Capsule	Rhamnose containing glycans	down	down	DOWNcore	core	4.19338	3.93267	20.46581	1
CH	Cell Wall and Capsule	Rhamnose containing glycans	up	-	mono	mono	289.42618000000004	97.56895999999999	52.94797	2
CH	Cell Wall and Capsule	Sialic Acid Metabolism	-	down	poly	poly	91.35649	23.38507	218.919	1
CH	Cell Wall and Capsule	Sialic Acid Metabolism	-	up	poly	poly	0	4.06295	0	1
CH	Cell Wall and Capsule	Sialic Acid Metabolism	up	-	mono	mono	2739.76947	79.71342	222.64301	2
CH	Cell Wall and Capsule	Sialic Acid Metabolism	up	up	UPcore	core	50.91867	73.99005	2.75136	1
CH	Cell Wall and Capsule	Teichoic and lipoteichoic acids biosynthesis	-	up	poly	poly	17.281019999999998	159.45532	49.554649999999995	2
CH	Cell Wall and Capsule	UDP-N-acetylmuramate from Fructose-6-phosphate Biosynthesis	-	down	poly	poly	420.92678	211.72353	1099.34407	1
CH	Cell Wall and Capsule	UDP-N-acetylmuramate from Fructose-6-phosphate Biosynthesis	-	up	poly	poly	1241.66355	2075.22209	996.11076	1
CH	Cell Wall and Capsule	Vibrio Core Oligosaccharide Biosynthesis	up	-	mono	mono	593.50541	131.05719	72.14269	3
CH	Cell Wall and Capsule	Vibrio Polysaccharide (VPS) Biosynthesis	-	up	poly	poly	172.43555	657.86966	241.12814	1
CH	Central metabolism	EC 6.4.1.- Ligases that form carbon-carbon bonds	-	down	poly	poly	468.57586	12.32774	356.06042	2
CH	Central metabolism	EC 6.4.1.- Ligases that form carbon-carbon bonds	-	up	poly	poly	76.64513	282.00209	137.29138	1
CH	Central metabolism	EC 6.4.1.- Ligases that form carbon-carbon bonds	down	-	mono	mono	414.5699	760.45783	1294.67773	1
CH	Central metabolism	EC 6.4.1.- Ligases that form carbon-carbon bonds	down	down	DOWNcore	core	89.2843	80.12487	685.24671	2
CH	DNA Metabolism	2-phosphoglycolate salvage	down	-	mono	mono	7.78736	46.00572	93.51525	1
CH	DNA Metabolism	2-phosphoglycolate salvage	up	-	mono	mono	288.26085	72.55274	65.87104	3
CH	DNA Metabolism	CRISPRs	up	-	mono	mono	10.09717	5.21793	0	1
CH	DNA Metabolism	DNA repair, bacterial	-	down	poly	poly	3.5457	1.05124	36.89635	1
CH	DNA Metabolism	DNA repair, bacterial	-	up	poly	poly	40.97785	214.63092	33.829989999999995	2
CH	DNA Metabolism	DNA repair, bacterial	up	-	mono	mono	943.3272000000001	230.97386	180.79996	3
CH	DNA Metabolism	DNA repair, bacterial	up	up	UPcore	core	401.04882	113.87559999999999	17.76103	2
CH	DNA Metabolism	DNA repair, bacterial DinG and relatives	-	up	poly	poly	14.61053	156.11907	15.32016	1
CH	DNA Metabolism	DNA repair, bacterial DinG and relatives	up	-	mono	mono	422.35081	89.61834	190.56632	1
CH	DNA Metabolism	DNA repair, bacterial MutL-MutS system	down	down	DOWNcore	core	116.29151	138.55733	375.20885	1
CH	DNA Metabolism	DNA repair, bacterial MutL-MutS system	up	down	monoUP-polyDOWN	mixed	426.75859	104.59404	262.14085	1
CH	DNA Metabolism	DNA repair, bacterial photolyase	up	-	mono	mono	586.46323	189.08481	46.62706	1
CH	DNA Metabolism	DNA repair, bacterial RecBCD pathway	up	-	mono	mono	182.56559	58.85428	26.68629	1
CH	DNA Metabolism	DNA repair, bacterial RecBCD pathway	up	up	UPcore	core	69.52466	81.75381	8.70793	1
CH	DNA Metabolism	DNA repair, bacterial UmuCD system	up	-	mono	mono	225.06775	27.20103	7.45141	1
CH	DNA Metabolism	DNA repair, UvrABC system	down	-	mono	mono	0.89259	0.83207	9.99913	1
CH	DNA Metabolism	DNA repair, UvrABC system	down	down	DOWNcore	core	3.88533	2.59046	28.52814	1
CH	DNA Metabolism	DNA structural proteins, bacterial	down	-	mono	mono	33.02357	101.15763000000001	319.70119	2
CH	DNA Metabolism	DNA structural proteins, bacterial	up	-	mono	mono	3938.6720099999998	2930.69254	1085.32891	1
CH	DNA Metabolism	DNA structural proteins, bacterial	up	up	UPcore	core	3242.37703	2115.97292	415.48395	1
CH	DNA Metabolism	DNA topoisomerases, Type I, ATP-independent	down	down	DOWNcore	core	3.20439	4.02912	20.95435	1
CH	DNA Metabolism	DNA topoisomerases, Type I, ATP-independent	up	up	UPcore	core	135.58001	153.33626	42.87668	1
CH	DNA Metabolism	DNA-replication	-	up	poly	poly	23.71952	430.07497	87.65097	1
CH	DNA Metabolism	DNA-replication	down	-	mono	mono	556.07757	823.02009	1884.9262600000002	2
CH	DNA Metabolism	DNA-replication	up	-	mono	mono	2257.66332	663.42644	1030.68237	4
CH	DNA Metabolism	Plasmid replication	-	up	poly	poly	223.51357	1513.50457	416.588	1
CH	DNA Metabolism	Plasmid replication	down	down	DOWNcore	core	145.33557	142.93023	424.2786	1
CH	DNA Metabolism	Restriction-Modification System	down	-	mono	mono	4.55187	17.46978	35.29197	1
CH	DNA Metabolism	Restriction-Modification System	down	down	DOWNcore	core	8.95368	17.24999	299.90893	1
CH	DNA Metabolism	Restriction-Modification System	up	-	mono	mono	116.70656	9.80844	22.65925	1
CH	DNA Metabolism	Type I Restriction-Modification	up	-	mono	mono	544.7713	389.42944	289.10399	1
CH	DNA Metabolism	YcfH	up	up	UPcore	core	113.76946	49.28623	12.24643	1
CH	Dormancy and Sporulation	Persister Cells	-	up	poly	poly	245.11884	4021.67478	486.17401	1
CH	Dormancy and Sporulation	Sporulation Cluster	up	up	UPcore	core	336.68845	114.50366	59.81951	1
CH	Fatty Acids and Lipids	Acetyl-CoA carboxylase complexes in plants	down	-	mono	mono	414.5699	760.45783	1294.67773	1
CH	Fatty Acids and Lipids	Acyclic terpenes utilization	-	down	poly	poly	3.80224	1.79129	39.63132	1
CH	Fatty Acids and Lipids	Acyclic terpenes utilization	down	-	mono	mono	0.39028	2.26756	9.17548	1
CH	Fatty Acids and Lipids	Acyclic terpenes utilization	down	down	DOWNcore	core	0.61868	0.74005	16.65976	1
CH	Fatty Acids and Lipids	archaeal lipids bobik	down	down	DOWNcore	core	18.34105	19.19686	121.6571	1
CH	Fatty Acids and Lipids	Carotenoid biosynthesis	-	down	poly	poly	33.66417	15.36286	73.94707	1
CH	Fatty Acids and Lipids	Carotenoid biosynthesis	down	-	mono	mono	90.96034	330.46343	1045.13854	4
CH	Fatty Acids and Lipids	Carotenoids	down	down	DOWNcore	core	1.07002	2.22014	39.64406	1
CH	Fatty Acids and Lipids	CDP-diacylglycerol biosynthesis in plants	-	up	poly	poly	30.30606	275.41504	57.04717	1
CH	Fatty Acids and Lipids	Fatty Acid Biosynthesis FASII	-	down	poly	poly	238.60274	85.35906	554.72785	1
CH	Fatty Acids and Lipids	Fatty Acid Biosynthesis FASII	down	down	DOWNcore	core	73.44012	53.85778	793.85206	1
CH	Fatty Acids and Lipids	Fatty Acid Biosynthesis FASII	up	-	mono	mono	156.16513	21.70858	19.69966	1
CH	Fatty Acids and Lipids	Fatty acid biosynthesis in plants (plastidial)	-	down	poly	poly	609.27488	282.55928	1163.46901	1
CH	Fatty Acids and Lipids	Fatty acid degradation regulons	down	-	mono	mono	293.35732	3285.71593	3364.02464	1
CH	Fatty Acids and Lipids	Fatty acid degradation regulons	up	-	mono	mono	2060.32625	1131.8587	190.67767	1
CH	Fatty Acids and Lipids	Glycerolipid and Glycerophospholipid Metabolism in Bacteria	-	down	poly	poly	240.53725	128.26912	604.75396	1
CH	Fatty Acids and Lipids	Glycerolipid and Glycerophospholipid Metabolism in Bacteria	-	up	poly	poly	5.36872	77.93664	16.7255	1
CH	Fatty Acids and Lipids	Glycerolipid and Glycerophospholipid Metabolism in Bacteria	down	-	mono	mono	66.76039	93.96307	215.44997	1
CH	Fatty Acids and Lipids	Glycerolipid and Glycerophospholipid Metabolism in Bacteria	down	down	DOWNcore	core	4.68926	6.27866	35.92751	1
CH	Fatty Acids and Lipids	Glycerolipid and Glycerophospholipid Metabolism in Bacteria	up	-	mono	mono	599.95985	219.12286	269.21431	2
CH	Fatty Acids and Lipids	Isoprenoid Biosynthesis	-	down	poly	poly	235.954	159.18928	646.29873	1
CH	Fatty Acids and Lipids	Isoprenoid Biosynthesis	down	-	mono	mono	26.30418	68.2432	145.24408	1
CH	Fatty Acids and Lipids	Isoprenoid Biosynthesis	down	down	DOWNcore	core	2.78512	1.48009	29.28605	1
CH	Fatty Acids and Lipids	Isoprenoid biosynthesis in plants, mevalonate branch	down	-	mono	mono	9.69881	12.0393	48.75562	1
CH	Fatty Acids and Lipids	Isoprenoinds for Quinones	down	-	mono	mono	18.74908	66.83038	115.26499	3
CH	Fatty Acids and Lipids	Mycobacterial FadD proteins (fatty acid CoA- and AMP- ligases)	down	down	DOWNcore	core	6.78466	4.78276	141.82153	1
CH	Fatty Acids and Lipids	Phosphatidylcholine biosynthesis in plants	up	-	mono	mono	40.72319	0.62239	2.4838	1
CH	Fatty Acids and Lipids	Polyhydroxybutyrate metabolism	-	down	poly	poly	39.7565	36.8713	131.72197	1
CH	Fatty Acids and Lipids	Polyhydroxybutyrate metabolism	-	up	poly	poly	0.92255	12.31189	0.84924	1
CH	Fatty Acids and Lipids	Polyhydroxybutyrate metabolism	down	-	mono	mono	1086.2138100000002	6881.21628	5497.94843	3
CH	Fatty Acids and Lipids	Polyhydroxybutyrate metabolism	down	down	DOWNcore	core	14.00632	11.97799	93.95271	1
CH	Fatty Acids and Lipids	Polyhydroxybutyrate metabolism	up	-	mono	mono	264.02713	3.82166	8.92709	1
CH	Fatty Acids and Lipids	polyprenyl synthesis	down	down	DOWNcore	core	139.43204	137.86537	517.4336	1
CH	Fatty Acids and Lipids	Putative oxidase COG2907	down	-	mono	mono	0	0	3.72479	1
CH	Fatty Acids and Lipids	Putative oxidase COG2907	up	up	UPcore	core	551.1824300000001	823.08613	24.092	2
CH	Fatty Acids and Lipids	Triacylglycerol metabolism	down	-	mono	mono	2.4511	7.2306	29.42031	1
CH	Fatty Acids and Lipids	Triacylglycerol metabolism	up	-	mono	mono	709.98322	29.67448	42.09864	1
CH	Fatty Acids and Lipids	Triacylglycerol metabolism	up	up	UPcore	core	229.56789	111.17438	6.36748	1
CH	Fatty Acids and Lipids	Unsaturated Fatty Acid Metabolism	down	-	mono	mono	1.11092	1.48009	33.57605	1
CH	General Stress Response and Stationary Phase Response	RpoS Regulators SG1	up	-	mono	mono	303.70498	23.97423	31.39909	1
CH	General Stress Response and Stationary Phase Response	RpoS Regulators SG1	up	up	UPcore	core	9293.88483	7057.10891	1448.39144	1
CH	Iron acquisition and metabolism	acinetobacter siderophore assembly	up	-	mono	mono	13.33179	1.48009	0.28308	1
CH	Iron acquisition and metabolism	Hemin transport system	down	-	mono	mono	0.72741	1.79129	7.87603	1
CH	Iron acquisition and metabolism	Hemin transport system	down	up	monoDOWN-polyUP	mixed	139.7951	1832.05128	595.71757	1
CH	Iron acquisition and metabolism	Hemin transport system	up	-	mono	mono	483.63951	55.571	108.53594	1
CH	Iron acquisition and metabolism	Iron acquisition in Vibrio	down	-	mono	mono	3175.17406	24608.76097	18442.22371	1
CH	Iron acquisition and metabolism	Iron acquisition in Vibrio	up	-	mono	mono	3924.15745	1113.99923	276.73501	1
CH	Iron acquisition and metabolism	Iron acquisition in Vibrio	up	up	UPcore	core	240.8073	65.93721	7.57378	1
CH	Iron acquisition and metabolism	RCJ pfr	-	down	poly	poly	367.08084	163.4054	633.45163	1
CH	Iron acquisition and metabolism	Transport of Iron	up	-	mono	mono	108.16941	7.55572	4.44802	1
CH	Membrane Transport	A TRAP transporter and a hypothetical	down	-	mono	mono	28.90796	134.06732	383.38981	1
CH	Membrane Transport	ABC transporter alkylphosphonate (TC 3.A.1.9.1)	-	down	poly	poly	314.19277	28.32218	213.30406	1
CH	Membrane Transport	ABC transporter alkylphosphonate (TC 3.A.1.9.1)	up	-	mono	mono	177.95023	2.27705	11.034669999999998	2
CH	Membrane Transport	ABC transporter branched-chain amino acid (TC 3.A.1.4.1)	-	down	poly	poly	1616.00511	130.42303	1137.71541	3
CH	Membrane Transport	ABC transporter branched-chain amino acid (TC 3.A.1.4.1)	down	down	DOWNcore	core	28.705	14.89069	247.43247	1
CH	Membrane Transport	ABC transporter branched-chain amino acid (TC 3.A.1.4.1)	up	-	mono	mono	3903.48652	179.99288	586.86446	1
CH	Membrane Transport	ABC transporter branched-chain amino acid (TC 3.A.1.4.1)	up	down	monoUP-polyDOWN	mixed	686.01587	35.86677	287.28773	1
CH	Membrane Transport	ABC transporter dipeptide (TC 3.A.1.5.2)	-	down	poly	poly	125.76634999999999	10.851750000000001	111.36396	2
CH	Membrane Transport	ABC transporter dipeptide (TC 3.A.1.5.2)	up	-	mono	mono	176.57739	10.56526	27.73917	1
CH	Membrane Transport	ABC transporter oligopeptide (TC 3.A.1.5.1)	-	down	poly	poly	354.67014	75.68871	623.34383	4
CH	Membrane Transport	ABC transporter oligopeptide (TC 3.A.1.5.1)	down	down	DOWNcore	core	22.1186	9.7806	88.80427	1
CH	Membrane Transport	acinetobacter siderophore assembly	up	-	mono	mono	13.33179	1.48009	0.28308	1
CH	Membrane Transport	Alkanesulfonate assimilation	down	-	mono	mono	1.45031	5.13129	16.37121	1
CH	Membrane Transport	Alkanesulfonates Utilization	down	-	mono	mono	0	4.40927	2.35779	1
CH	Membrane Transport	Ammonia assimilation	-	down	poly	poly	984.04364	405.64198	1180.36032	1
CH	Membrane Transport	Arginine and Ornithine Degradation	-	down	poly	poly	109.32591	14.38025	84.30786	2
CH	Membrane Transport	Arginine and Ornithine Degradation	up	-	mono	mono	658.24292	3.7922599999999997	22.98066	2
CH	Membrane Transport	Arginine and Ornithine Degradation	up	down	monoUP-polyDOWN	mixed	184.86461	11.34415	70.72998	1
CH	Membrane Transport	At4g17370	-	down	poly	poly	0.91578	0	9.33436	1
CH	Membrane Transport	Bacterial Chemotaxis	-	down	poly	poly	765.65795	12.05193	131.76872	1
CH	Membrane Transport	Benzoate transport and degradation cluster	-	down	poly	poly	2.33282	2.94546	19.80287	1
CH	Membrane Transport	CbiZ Main	up	-	mono	mono	19.97896	8.65723	4.76215	1
CH	Membrane Transport	CBSS-195102.1.peg.963	up	-	mono	mono	174.74148	14.27213	8.07967	1
CH	Membrane Transport	CBSS-195102.1.peg.963	up	down	monoUP-polyDOWN	mixed	756.98349	12.48584	65.37704	1
CH	Membrane Transport	CBSS-565654.4.peg.3098 cAD1 cluster	down	-	mono	mono	17.9692	59.09026	93.94447	1
CH	Membrane Transport	Chitin and N-acetylglucosamine utilization	-	down	poly	poly	302.79834	24.701	143.93657	1
CH	Membrane Transport	Chitin and N-acetylglucosamine utilization	-	up	poly	poly	9.012730000000001	151.29168	2.955	2
CH	Membrane Transport	Chitin and N-acetylglucosamine utilization	up	-	mono	mono	74.4903	0.62239	3.64718	2
CH	Membrane Transport	Choline and Betaine Uptake and Betaine Biosynthesis	-	down	poly	poly	125.19901	7.12654	51.82389	1
CH	Membrane Transport	Choline and Betaine Uptake and Betaine Biosynthesis	down	-	mono	mono	0	0.74005	5.58216	1
CH	Membrane Transport	Choline and Betaine Uptake and Betaine Biosynthesis	up	down	monoUP-polyDOWN	mixed	247.08778	15.76797	79.39775	1
CH	Membrane Transport	Cysteine Biosynthesis	down	-	mono	mono	5.88755	44.33552	34.09295	1
CH	Membrane Transport	Cysteine Biosynthesis	up	up	UPcore	core	356.10206	91.67806	24.90013	1
CH	Membrane Transport	Cysteine Biosynthesis, MCB 432	up	-	mono	mono	2833.92015	190.30944	254.12884	1
CH	Membrane Transport	D-Galacturonate and D-Glucuronate Utilization	-	down	poly	poly	2.53828	1.61481	15.20966	1
CH	Membrane Transport	D-Galacturonate and D-Glucuronate Utilization	-	up	poly	poly	2.2227	4.29922	0.31413	1
CH	Membrane Transport	D-gluconate and ketogluconates metabolism	up	-	mono	mono	560.97146	1.48009	4.36858	2
CH	Membrane Transport	D-ribose utilization	up	down	monoUP-polyDOWN	mixed	813.93673	8.578800000000001	45.02719	2
CH	Membrane Transport	Deoxyribose and Deoxynucleoside Catabolism	up	-	mono	mono	2007.60532	74.48273999999999	181.65926	2
CH	Membrane Transport	Deoxyribose and Deoxynucleoside Catabolism	up	down	monoUP-polyDOWN	mixed	107.42994	2.15751	15.56213	1
CH	Membrane Transport	Experimental tye	up	-	mono	mono	200.91431	47.45857	20.96259	1
CH	Membrane Transport	FOL Commensurate regulon activation	up	up	UPcore	core	642.96419	473.04495	89.03159	1
CH	Membrane Transport	Folate Biosynthesis	down	-	mono	mono	156.14325	353.7249	602.6717	1
CH	Membrane Transport	Fructooligosaccharides(FOS) and Raffinose Utilization	up	-	mono	mono	106.21627	4.30126	0.44014	1
CH	Membrane Transport	Fructose utilization	up	-	mono	mono	3770.5974800000004	16.14464	29.53626	3
CH	Membrane Transport	General Secretion Pathway	-	up	poly	poly	3.45276	95.44242	3.36409	1
CH	Membrane Transport	Glutamine, Glutamate, Aspartate and Asparagine Biosynthesis	up	up	UPcore	core	447.03696	111.35379	45.71936	1
CH	Membrane Transport	Glycerol and Glycerol-3-phosphate Uptake and Utilization	-	down	poly	poly	1.1354	0	7.36832	1
CH	Membrane Transport	Glycerol and Glycerol-3-phosphate Uptake and Utilization	up	-	mono	mono	3399.71525	26.30124	164.40794	1
CH	Membrane Transport	Glycerol and Glycerol-3-phosphate Uptake and Utilization	up	down	monoUP-polyDOWN	mixed	2900.58038	11.219850000000001	221.94	2
CH	Membrane Transport	Hemin transport system	up	-	mono	mono	483.63951	55.571	108.53594	1
CH	Membrane Transport	Hexose Phosphate Uptake System	-	down	poly	poly	5.92556	0	3.6764	1
CH	Membrane Transport	HtrA and Sec secretion	down	-	mono	mono	61.30986	361.80449	257.26207	1
CH	Membrane Transport	Hydantoin metabolism	down	down	DOWNcore	core	9.93988	6.24927	68.68814	1
CH	Membrane Transport	Inositol catabolism	up	-	mono	mono	645.96024	18.86893	31.40369	3
CH	Membrane Transport	KDO2-Lipid A biosynthesis	up	-	mono	mono	138.34755	75.86454	63.74977	1
CH	Membrane Transport	L-Arabinose CS	up	-	mono	mono	29.46483	0	0.84924	1
CH	Membrane Transport	L-rhamnose utilization	up	-	mono	mono	160.02277999999998	1.61814	2.86185	3
CH	Membrane Transport	L-rhamnose utilization	up	down	monoUP-polyDOWN	mixed	163.32551	0	13.24085	1
CH	Membrane Transport	Lactate utilization	-	down	poly	poly	42.22315	30.21942	196.61576	1
CH	Membrane Transport	Lipopolysaccharide assembly	down	-	mono	mono	125.00115	177.43837	367.18764	1
CH	Membrane Transport	Malonate_	-	down	poly	poly	21.06498	3.70024	13.17147	1
CH	Membrane Transport	Malonate_	up	down	monoUP-polyDOWN	mixed	25.71171	0	2.34226	1
CH	Membrane Transport	Maltose and Maltodextrin Utilization	-	up	poly	poly	5.81736	69.58585	3.06549	1
CH	Membrane Transport	Maltose and Maltodextrin Utilization	up	-	mono	mono	91.71066	29.32945	8.64401	1
CH	Membrane Transport	Maltose and Maltodextrin Utilization	up	down	monoUP-polyDOWN	mixed	150.53069	10.51304	43.41725	1
CH	Membrane Transport	Mannose Metabolism	down	-	mono	mono	3.7911	5.37798	30.17094	1
CH	Membrane Transport	Mannose-sensitive hemagglutinin type 4 pilus	-	up	poly	poly	11.68178	421.89135	7.07336	1
CH	Membrane Transport	Methionine Biosynthesis	down	-	mono	mono	15.38243	90.12251	82.95082	1
CH	Membrane Transport	Na(+) H(+) antiporter	-	up	poly	poly	31.45807	367.64686	71.5016	1
CH	Membrane Transport	Na(+) H(+) antiporter	down	-	mono	mono	41.00565	184.24896	263.04413	1
CH	Membrane Transport	Na(+)-translocating NADH-quinone oxidoreductase and rnf-like group of electron transport complexes	down	-	mono	mono	79.59049	151.39613	401.14164	3
CH	Membrane Transport	Nitrate and nitrite ammonification	down	-	mono	mono	13.5335	204.18319	80.34014	1
CH	Membrane Transport	Novel non-oxidative pathway of Uracil catabolism	up	-	mono	mono	7.71267	0	0.28308	1
CH	Membrane Transport	P uptake (cyanobacteria)	down	down	DOWNcore	core	219.49704	314.33931	1159.49647	1
CH	Membrane Transport	PCB5530 pyridoxine salvage	up	-	mono	mono	91.62355	17.94319	3.99235	1
CH	Membrane Transport	Periplasmic-Binding-Protein-Dependent Transport System for alpha-Glucosides	up	-	mono	mono	898.38427	2.45922	4.36858	1
CH	Membrane Transport	Phosphate metabolism	-	down	poly	poly	91.83651	42.24292	296.59573	1
CH	Membrane Transport	Phosphate metabolism	down	-	mono	mono	61.59244	493.35958	261.16569	1
CH	Membrane Transport	PII Superfamily	down	-	mono	mono	16.80221	74.67646	112.3511	1
CH	Membrane Transport	Polyamine Metabolism	down	down	DOWNcore	core	1.15311	0.93691	23.0327	1
CH	Membrane Transport	Polyamine Metabolism	up	-	mono	mono	6564.6559	1627.37274	1148.88033	4
CH	Membrane Transport	Polyamine Metabolism	up	down	monoUP-polyDOWN	mixed	217.46866	6.93806	30.50606	1
CH	Membrane Transport	Polyhydroxybutyrate metabolism	-	up	poly	poly	0.92255	12.31189	0.84924	1
CH	Membrane Transport	Polyhydroxybutyrate metabolism	up	-	mono	mono	264.02713	3.82166	8.92709	1
CH	Membrane Transport	Potassium homeostasis	down	-	mono	mono	0	2.78703	5.45615	1
CH	Membrane Transport	Purine Utilization	-	down	poly	poly	43.81651	32.18824	122.81137	2
CH	Membrane Transport	Putative oxidase COG2907	down	-	mono	mono	0	0	3.72479	1
CH	Membrane Transport	Pyrimidine utilization	-	down	poly	poly	113.95448	18.75475	96.57068	2
CH	Membrane Transport	Queuosine-Archaeosine Biosynthesis	-	down	poly	poly	19.33215	5.7483	64.46935	1
CH	Membrane Transport	Queuosine-Archaeosine Biosynthesis	up	-	mono	mono	875.90315	194.59285	238.92204	1
CH	Membrane Transport	Respiration / Human gut microbiome	up	-	mono	mono	172.44703	88.43894	22.01729	1
CH	Membrane Transport	Sialic Acid Metabolism	-	down	poly	poly	91.35649	23.38507	218.919	1
CH	Membrane Transport	Sialic Acid Metabolism	up	-	mono	mono	2488.11969	59.51402	165.31641	1
CH	Membrane Transport	Sodium Hydrogen Antiporter	up	-	mono	mono	611.0569800000001	59.76195	81.37654	4
CH	Membrane Transport	Sucrose utilization Shewanella	-	up	poly	poly	0.90483	40.60565	3.99053	1
CH	Membrane Transport	Sugar utilization in Thermotogales	-	down	poly	poly	28.68255	1.79539	16.21961	1
CH	Membrane Transport	Sugar utilization in Thermotogales	down	-	mono	mono	0	2.26756	2.64087	1
CH	Membrane Transport	Sugar utilization in Thermotogales	up	-	mono	mono	968.73465	10.00639	22.992539999999998	2
CH	Membrane Transport	Sugar utilization in Thermotogales	up	down	monoUP-polyDOWN	mixed	463.07693	4.74576	65.29309	1
CH	Membrane Transport	Taurine Utilization	-	down	poly	poly	39.53291	4.8242	27.90994	1
CH	Membrane Transport	Thiamin biosynthesis	-	down	poly	poly	14.39537	2.28876	16.78213	1
CH	Membrane Transport	Thiamin biosynthesis	down	-	mono	mono	2.67221	51.89346	28.04506	1
CH	Membrane Transport	Thiamin biosynthesis	down	down	DOWNcore	core	0.54999	1.13378	17.88522	1
CH	Membrane Transport	Thiamin biosynthesis	up	-	mono	mono	159.25241	1.62493	7.30987	2
CH	Membrane Transport	Ton and Tol transport systems	-	up	poly	poly	76.71619	957.165	97.61349	2
CH	Membrane Transport	Ton and Tol transport systems	down	-	mono	mono	3446.01806	26383.47118	19593.508569999998	5
CH	Membrane Transport	Ton and Tol transport systems	down	up	monoDOWN-polyUP	mixed	252.59978	5419.9583999999995	1129.19192	2
CH	Membrane Transport	Ton and Tol transport systems	up	-	mono	mono	7027.33953	2783.16789	2624.86267	6
CH	Membrane Transport	Transport of Manganese	-	down	poly	poly	1.36745	0	4.29278	1
CH	Membrane Transport	Transport of Manganese	down	-	mono	mono	0	0	3.20703	1
CH	Membrane Transport	Transport of Manganese	down	down	DOWNcore	core	0.72741	0.87809	13.75133	1
CH	Membrane Transport	Transport of Molybdenum	up	-	mono	mono	52.99515	31.86202	18.02676	1
CH	Membrane Transport	Transport of Nickel and Cobalt	-	down	poly	poly	0.39028	0	3.41249	1
CH	Membrane Transport	Transport of Nickel and Cobalt	down	down	DOWNcore	core	2.16193	0	17.83319	1
CH	Membrane Transport	Transport of Nickel and Cobalt	up	-	mono	mono	277.96896000000004	1.48009	13.85454	2
CH	Membrane Transport	Transport of Zinc	-	down	poly	poly	2.46742	4.53512	14.2554	1
CH	Membrane Transport	Transport of Zinc	-	up	poly	poly	34.33342	51.29895	12.6537	1
CH	Membrane Transport	Twin-arginine translocation system	up	-	mono	mono	344.65237	209.81213	109.92575	1
CH	Membrane Transport	Type III secretion system orphans	-	up	poly	poly	244.13653	415.24855	139.25023	1
CH	Membrane Transport	Type IV pilus	-	up	poly	poly	226.38956	5644.72034	394.2858	6
CH	Membrane Transport	Type IV pilus	down	-	mono	mono	307.76212000000004	3147.8435600000003	1570.61843	5
CH	Membrane Transport	Type IV pilus	down	down	DOWNcore	core	4.23629	16.55388	99.7686	1
CH	Membrane Transport	Type IV pilus	down	up	monoDOWN-polyUP	mixed	258.91536	3294.14446	1020.32263	2
CH	Membrane Transport	Type IV pilus	up	-	mono	mono	773.9358	367.5108	315.67233	1
CH	Membrane Transport	Uptake of selenate and selenite	up	-	mono	mono	2514.7631100000003	91.18176	440.92638	2
CH	Membrane Transport	Uptake of selenate and selenite	up	down	monoUP-polyDOWN	mixed	1293.8985300000002	6.74991	39.45413	2
CH	Membrane Transport	Urea decomposition	down	down	DOWNcore	core	53.76553	39.96008	227.76587	1
CH	Membrane Transport	Utilization of glutathione as a sulphur source	-	down	poly	poly	1.14087	0	3.20521	1
CH	Membrane Transport	Widespread colonization island	-	up	poly	poly	22.569499999999998	52.74105	3.41066	3
CH	Membrane Transport	Widespread colonization island	up	-	mono	mono	233.29513	53.123749999999994	20.42106	2
CH	Membrane Transport	Xanthine Metabolism in Bacteria	-	up	poly	poly	8.44061	120.64238	16.4059	1
CH	Membrane Transport	Xylose utilization	-	down	poly	poly	346.22986	17.09374	156.33364	2
CH	Membrane Transport	Xylose utilization	up	-	mono	mono	124.59244	1.96585	8.62666	1
CH	Metabolism of Aromatic Compounds	2-aminophenol Metabolism	-	up	poly	poly	15.289	221.1416	17.90803	1
CH	Metabolism of Aromatic Compounds	4-Hydroxyphenylacetic acid catabolic pathway	-	down	poly	poly	79.1359	4.85234	48.50273	2
CH	Metabolism of Aromatic Compounds	4-Hydroxyphenylacetic acid catabolic pathway	up	-	mono	mono	49.89822	0	0	1
CH	Metabolism of Aromatic Compounds	Anaerobic Aromatic Degredation (benzoate)	-	down	poly	poly	90.5307	65.27751	238.82958	1
CH	Metabolism of Aromatic Compounds	Anaerobic Aromatic Degredation (benzoate)	down	-	mono	mono	8.65702	9.55792	53.50771	2
CH	Metabolism of Aromatic Compounds	Anaerobic Aromatic Degredation (benzoate)	down	up	monoDOWN-polyUP	mixed	257.71125	7161.12701	1144.66239	1
CH	Metabolism of Aromatic Compounds	Anaerobic benzoate metabolism	-	down	poly	poly	39.7565	36.8713	131.72197	1
CH	Metabolism of Aromatic Compounds	Benzoate catabolism	up	-	mono	mono	196.09521	2.70369	8.04862	1
CH	Metabolism of Aromatic Compounds	Benzoate degradation	-	down	poly	poly	13.88191	1.70115	25.84894	1
CH	Metabolism of Aromatic Compounds	Benzoate degradation	up	-	mono	mono	91.62355	17.94319	3.99235	1
CH	Metabolism of Aromatic Compounds	Benzoate transport and degradation cluster	-	down	poly	poly	2.33282	2.94546	19.80287	1
CH	Metabolism of Aromatic Compounds	Benzoate transport and degradation cluster	down	down	DOWNcore	core	18.00714	37.67288	303.4997	2
CH	Metabolism of Aromatic Compounds	Benzoate transport and degradation cluster	up	up	UPcore	core	709.26489	492.88675	257.10491	1
CH	Metabolism of Aromatic Compounds	Biphenyl Degradation	-	down	poly	poly	22.6282	0.62239	17.01864	1
CH	Metabolism of Aromatic Compounds	Biphenyl Degradation	up	-	mono	mono	193.05061	21.32594	7.9089	2
CH	Metabolism of Aromatic Compounds	Catechol branch of beta-ketoadipate pathway	up	-	mono	mono	181.66789	7.34161	32.31685	1
CH	Metabolism of Aromatic Compounds	Catechol branch of beta-ketoadipate pathway	up	down	monoUP-polyDOWN	mixed	118.49686	6.92668	41.93429	1
CH	Metabolism of Aromatic Compounds	Central meta-cleavage pathway of aromatic compound degradation	-	down	poly	poly	159.06984	54.42705	226.93119	2
CH	Metabolism of Aromatic Compounds	Central meta-cleavage pathway of aromatic compound degradation	down	-	mono	mono	17.06777	52.00646	121.63975	1
CH	Metabolism of Aromatic Compounds	Central meta-cleavage pathway of aromatic compound degradation	down	down	DOWNcore	core	10.84323	20.48433	375.36036	2
CH	Metabolism of Aromatic Compounds	Central meta-cleavage pathway of aromatic compound degradation	up	-	mono	mono	150.07937	13.65949	17.27431	4
CH	Metabolism of Aromatic Compounds	Central meta-cleavage pathway of aromatic compound degradation	up	down	monoUP-polyDOWN	mixed	369.67294	1.36244	28.83862	1
CH	Metabolism of Aromatic Compounds	Chloroaromatic degradation pathway	up	-	mono	mono	478.09317	34.21909	90.47803	1
CH	Metabolism of Aromatic Compounds	Chlorobenzoate degradation	up	-	mono	mono	241.46411	0.93691	1.13232	1
CH	Metabolism of Aromatic Compounds	Gentisate degradation	down	down	DOWNcore	core	1.69052	1.13378	34.24637	1
CH	Metabolism of Aromatic Compounds	Gentisate degradation	up	-	mono	mono	439.96129	1.13378	7.40484	1
CH	Metabolism of Aromatic Compounds	Homogentisate pathway of aromatic compound degradation	-	up	poly	poly	305.1825	1116.92282	130.89554	1
CH	Metabolism of Aromatic Compounds	Homogentisate pathway of aromatic compound degradation	down	-	mono	mono	0.39028	0.99242	5.87894	1
CH	Metabolism of Aromatic Compounds	Homogentisate pathway of aromatic compound degradation	up	up	UPcore	core	1482.53589	1949.91428	283.03857	2
CH	Metabolism of Aromatic Compounds	N-heterocyclic aromatic compound degradation	down	-	mono	mono	60.80574	775.04087	568.98383	2
CH	Metabolism of Aromatic Compounds	n-Phenylalkanoic acid degradation	down	-	mono	mono	1031.13424	6545.90788	5235.77912	1
CH	Metabolism of Aromatic Compounds	p-Hydroxybenzoate degradation	-	down	poly	poly	74.39853	2.55885	28.03136	1
CH	Metabolism of Aromatic Compounds	Phenol hydroxylase	-	down	poly	poly	5.24439	0.74005	41.13258	2
CH	Metabolism of Aromatic Compounds	Phenylacetyl-CoA catabolic pathway (core)	up	-	mono	mono	6513.80016	16.23796	1.76058	2
CH	Metabolism of Aromatic Compounds	Phenylpropanoid compound degradation	-	down	poly	poly	0.60687	0	3.80424	1
CH	Metabolism of Aromatic Compounds	Phenylpropanoid compound degradation	up	-	mono	mono	88.58578	0.74005	1.02182	2
CH	Metabolism of Aromatic Compounds	Protocatechuate branch of beta-ketoadipate pathway	-	down	poly	poly	12.27492	0	8.77366	1
CH	Metabolism of Aromatic Compounds	Protocatechuate branch of beta-ketoadipate pathway	up	up	UPcore	core	2382.90822	3338.1125899999997	682.22588	2
CH	Metabolism of Aromatic Compounds	Quinate degradation	down	-	mono	mono	3.06163	6.14095	28.42771	1
CH	Metabolism of Aromatic Compounds	Salicylate and gentisate catabolism	-	down	poly	poly	17.39583	5.5152	41.83932	1
CH	Metabolism of Aromatic Compounds	Salicylate and gentisate catabolism	up	-	mono	mono	610.50441	385.10981	251.27705	1
CH	Metabolism of Aromatic Compounds	Salicylate and gentisate catabolism	up	up	UPcore	core	634.8616	617.53081	132.1119	1
CH	Metabolism of Aromatic Compounds	Salicylate ester degradation	-	down	poly	poly	0.8589	0	7.67239	1
CH	Metabolite processes	RidA family in 981 representative prokaryotes	-	up	poly	poly	208.21622	682.71129	217.6114	2
CH	Metabolite processes	RidA family in 981 representative prokaryotes	down	down	DOWNcore	core	13.836780000000001	13.00471	183.33024999999998	3
CH	Metabolite processes	RidA family in 981 representative prokaryotes	up	-	mono	mono	1174.81096	233.46877	526.29258	1
CH	Metabolite processes	RidA family in 981 representative prokaryotes	up	up	UPcore	core	2445.61697	2029.22737	532.07647	1
CH	Metabolite processes	RidA proteins copy with new groups	down	-	mono	mono	90.49451	331.11418	406.5193	1
CH	Metabolite processes	RidA proteins copy with new groups	down	down	DOWNcore	core	533.13573	1345.2017700000001	4262.50487	2
CH	Metabolite processes	RidA proteins copy with new groups	up	-	mono	mono	1519.4935500000001	249.6042	456.58616	3
CH	Metabolite processes	RidA proteins copy with new groups	up	up	UPcore	core	263.32619	426.09593	57.76579	1
CH	Metabolite processes	RidA1 subgroup	down	-	mono	mono	15.1115	41.42727	73.63476	1
CH	Metabolite processes	RidA1 subgroup	down	down	DOWNcore	core	0	0.74005	6.6314	1
CH	Metabolite processes	RidA1 subgroup	up	-	mono	mono	344.08655	95.17697	43.97613	1
CH	Metabolite processes	RidA2 subgroup (YoaB-like)	up	-	mono	mono	1090.71067	32.79912	85.59169	1
CH	Metabolite processes	RidA5 subgroup	up	down	monoUP-polyDOWN	mixed	1534.98478	20.90244	136.03573	1
CH	Metabolite processes	TN RidA: all subgroups, 981 genomes carbamoyl-P	down	-	mono	mono	0	0.74005	1.72953	1
CH	Metabolite processes	TN RidA: all subgroups, 981 genomes carbamoyl-P	up	up	UPcore	core	307.41086	325.15121	127.74879	2
CH	Metabolite processes	TN RidA: all subgroups, 981 genomes PLP	down	-	mono	mono	17.04185	54.07535	143.13286	1
CH	Metabolite processes	TN RidA: all subgroups, 981 genomes PLP	up	up	UPcore	core	1164.50942	1810.6998099999998	645.51141	2
CH	Miscellaneous	At1g48360	-	up	poly	poly	14.61053	156.11907	15.32016	1
CH	Miscellaneous	At1g48360	up	-	mono	mono	422.35081	89.61834	190.56632	1
CH	Miscellaneous	At1g54520	up	-	mono	mono	70.47036	17.083	17.06703	1
CH	Miscellaneous	At1g69340 At2g40600	-	down	poly	poly	35.79799	3.44152	49.78474	1
CH	Miscellaneous	At1g69340 At2g40600	down	-	mono	mono	7.40439	38.58916	72.79549	1
CH	Miscellaneous	At5g04520 AT1G06240	down	-	mono	mono	82.4541	103.20821	249.52375	1
CH	Miscellaneous	At5g04520 AT1G06240	down	down	DOWNcore	core	252.36825	457.2264	1576.33604	1
CH	Miscellaneous	At5g04520 AT1G06240	up	-	mono	mono	4721.77837	1398.40617	480.65353	2
CH	Miscellaneous	Broadly distributed proteins not in subsystems	down	-	mono	mono	22.88878	69.70488	296.5828	1
CH	Miscellaneous	COG0277	up	-	mono	mono	610.50441	385.10981	251.27705	1
CH	Miscellaneous	COG0523-Histidine	up	up	UPcore	core	481.32077	379.17066	168.63662	2
CH	Miscellaneous	COG1836	-	down	poly	poly	235.954	159.18928	646.29873	1
CH	Miscellaneous	COG1836	down	-	mono	mono	9.90638	49.03614	54.08757	1
CH	Miscellaneous	COG2016	up	-	mono	mono	183.6966	125.15936	61.59926	1
CH	Miscellaneous	Competence or DNA damage-inducible protein CinA and related protein families	-	down	poly	poly	498.63737	274.00121	721.75522	2
CH	Miscellaneous	Competence or DNA damage-inducible protein CinA and related protein families	up	down	monoUP-polyDOWN	mixed	358.11662	56.67151	182.36792	1
CH	Miscellaneous	EC 2.7.1.- Phosphotransferases with an alcohol group as acceptor	down	down	DOWNcore	core	1.32838	1.44498	20.11882	1
CH	Miscellaneous	EC 2.7.1.- Phosphotransferases with an alcohol group as acceptor	up	-	mono	mono	181.18822	81.20209	49.5236	1
CH	Miscellaneous	EC 4. 1. 1.- Carboxy-lyases	-	down	poly	poly	47.25749	12.3758	153.13919	1
CH	Miscellaneous	EC 4. 1. 1.- Carboxy-lyases	-	up	poly	poly	369.84623	1582.86061	730.78665	1
CH	Miscellaneous	EC 4. 1. 1.- Carboxy-lyases	down	-	mono	mono	1000.8298	3386.14515	4469.99439	6
CH	Miscellaneous	EC 4. 1. 1.- Carboxy-lyases	down	down	DOWNcore	core	39.49773	66.57193	691.64005	1
CH	Miscellaneous	EC 4. 1. 1.- Carboxy-lyases	up	down	monoUP-polyDOWN	mixed	74.30231	0	8.99101	1
CH	Miscellaneous	EC 4.1.2.- Aldehyde-lyases	-	down	poly	poly	42.3733	1.28622	29.56549	1
CH	Miscellaneous	EC 4.1.2.- Aldehyde-lyases	down	-	mono	mono	5.70936	40.59958	52.25119	1
CH	Miscellaneous	EC 4.1.2.- Aldehyde-lyases	down	up	monoDOWN-polyUP	mixed	13.47829	124.80957	43.22368	1
CH	Miscellaneous	EC 4.1.3.- Oxo-acid-lyases	-	up	poly	poly	324.24745	1196.43525	168.48864999999998	3
CH	Miscellaneous	EC 4.1.3.- Oxo-acid-lyases	down	-	mono	mono	18.0291	111.20833	200.84749	2
CH	Miscellaneous	EC 6.3.4.- Ligases that form carbon-nitrogen bonds	-	down	poly	poly	609.27488	282.55928	1163.46901	1
CH	Miscellaneous	EC 6.3.4.- Ligases that form carbon-nitrogen bonds	down	-	mono	mono	149.42571	490.6794	747.21067	1
CH	Miscellaneous	EC 6.3.4.- Ligases that form carbon-nitrogen bonds	down	down	DOWNcore	core	58.36061	20.690550000000002	286.0548	1
CH	Miscellaneous	IojapClusters	-	down	poly	poly	94.31831	47.152460000000005	203.89927	2
CH	Miscellaneous	IojapClusters	down	-	mono	mono	640.78835	2057.83387	4326.58534	2
CH	Miscellaneous	IojapClusters	up	-	mono	mono	4211.86052	999.99831	1239.09777	3
CH	Miscellaneous	Metabolite repair	-	down	poly	poly	136.22286	83.36618	305.76452	1
CH	Miscellaneous	Metabolite repair	-	up	poly	poly	14.37175	351.42521	20.02567	1
CH	Miscellaneous	Metabolite repair	down	-	mono	mono	285.51626	1962.15167	1882.6605299999999	4
CH	Miscellaneous	Metabolite repair	down	down	DOWNcore	core	50.97413	72.81273	292.45333	1
CH	Miscellaneous	Metabolite repair	up	-	mono	mono	2418.55581	1010.42156	773.27581	6
CH	Miscellaneous	Metabolite repair	up	up	UPcore	core	340.89433	116.24531	3.04996	2
CH	Miscellaneous	Omega-amidase	down	-	mono	mono	8.14847	47.24483	61.82848	1
CH	Miscellaneous	Omega-amidase	up	up	UPcore	core	622.66575	190.38749	4.52564	1
CH	Miscellaneous	Omega-amidase KE	down	down	DOWNcore	core	4.5246	5.43521	45.02901	1
CH	Miscellaneous	Omega-amidase KE2	down	-	mono	mono	145.20156	306.14354000000003	658.96241	3
CH	Miscellaneous	Omega-amidase KE2	down	down	DOWNcore	core	2.92423	2.48042	35.51382	1
CH	Miscellaneous	Omega-amidase KE2	up	-	mono	mono	1497.5429199999999	481.34683	502.32114	2
CH	Miscellaneous	Omega-amidase KE2	up	up	UPcore	core	2445.61697	2029.22737	532.07647	1
CH	Miscellaneous	Single-Rhodanese-domain proteins	-	up	poly	poly	21.90028	113.53941	21.61002	1
CH	Miscellaneous	YebC	-	down	poly	poly	2.16193	0	3.34675	1
CH	Miscellaneous	YebC	down	-	mono	mono	0.37256	0.87809	7.43406	1
CH	Miscellaneous	YebC	down	down	DOWNcore	core	124.28255999999999	191.90469	761.58653	2
CH	Miscellaneous	YebC	up	-	mono	mono	808.32967	202.94214	167.82847999999998	4
CH	Miscellaneous	YgfZ-Fe-S	-	down	poly	poly	653.93073	241.77712	1083.95722	2
CH	Miscellaneous	YgfZ-Fe-S	down	-	mono	mono	9.76064	49.14426	211.67774	1
CH	Miscellaneous	YgfZ-Fe-S	up	-	mono	mono	4440.51636	418.31557	485.34985	4
CH	Miscellaneous	YgfZ-Fe-S	up	up	UPcore	core	467.37321000000003	178.45131	85.95699	2
CH	Mitochondrial electron transport system in plants	F0F1-type ATP synthase in plants (mitochondrial)	down	-	mono	mono	3584.99127	7509.15118	16772.89627	4
CH	Mitochondrial electron transport system in plants	Respiratory complex III (cytochrome b-c1) in plants	down	-	mono	mono	408.3817	4093.8816699999998	4339.90514	3
CH	Mitochondrial electron transport system in plants	Respiratory complex IV (terminal cytochrome c oxidase) in plants	down	-	mono	mono	611.27532	3349.6023800000003	5638.34619	3
CH	Motility and Chemotaxis	Bacterial Chemotaxis	-	down	poly	poly	765.65795	12.05193	131.76872	1
CH	Motility and Chemotaxis	Bacterial Chemotaxis	-	up	poly	poly	594.3849	998.83766	328.00002	1
CH	Motility and Chemotaxis	Bacterial Chemotaxis	up	-	mono	mono	5197.94793	1158.8537999999999	565.59989	2
CH	Motility and Chemotaxis	Bacterial Chemotaxis	up	up	UPcore	core	35722.75822	22062.2862	3460.02205	9
CH	Motility and Chemotaxis	Bacterial motility:Gliding	-	down	poly	poly	8.347	7.34161	73.25307	1
CH	Motility and Chemotaxis	Bacterial motility:Gliding	-	up	poly	poly	215.74014	4829.16371	363.28201	6
CH	Motility and Chemotaxis	Bacterial motility:Gliding	down	-	mono	mono	74.32804	548.40877	446.88504	3
CH	Motility and Chemotaxis	Bacterial motility:Gliding	down	down	DOWNcore	core	64.69028	54.24868	835.96154	2
CH	Motility and Chemotaxis	Bacterial motility:Gliding	down	up	monoDOWN-polyUP	mixed	150.26246	2096.53053	585.98713	1
CH	Motility and Chemotaxis	Bacterial motility:Gliding	up	-	mono	mono	218.31171	70.73581	86.08301	1
CH	Motility and Chemotaxis	Flagellar motility	-	down	poly	poly	24.35159	3.40452	196.18923	1
CH	Motility and Chemotaxis	Flagellar motility	-	up	poly	poly	1044.16507	4584.56826	895.20429	2
CH	Motility and Chemotaxis	Flagellar motility	up	up	UPcore	core	9953.22071	6338.7035	910.15887	2
CH	Motility and Chemotaxis	Flagellum	-	up	poly	poly	6308.92466	46148.35249	5080.44771	10
CH	Motility and Chemotaxis	Flagellum	down	-	mono	mono	640.61573	1665.90941	3426.16797	2
CH	Motility and Chemotaxis	Flagellum	up	-	mono	mono	4603.90812	1390.5593800000001	670.57807	3
CH	Motility and Chemotaxis	Flagellum	up	up	UPcore	core	90597.7285	90106.30802	4322.5306900000005	21
CH	Motility and Chemotaxis	Flagellum in Campylobacter	-	up	poly	poly	478.14979	2667.10934	513.74191	1
CH	Motility and Chemotaxis	Flagellum in Campylobacter	up	-	mono	mono	523.59304	178.56303	295.06411	1
CH	Motility and Chemotaxis	Flagellum in Campylobacter	up	up	UPcore	core	672.14638	1448.60263	104.25313	1
CH	Nitrogen Metabolism	Allantoin Utilization	-	down	poly	poly	2.7231	1.24479	9.30513	1
CH	Nitrogen Metabolism	Allantoin Utilization	up	up	UPcore	core	502.58444	611.72304	242.10703	1
CH	Nitrogen Metabolism	Ammonia assimilation	-	down	poly	poly	1146.10081	415.50669999999997	1298.13651	3
CH	Nitrogen Metabolism	Ammonia assimilation	down	-	mono	mono	742.53485	3111.188	6277.55851	2
CH	Nitrogen Metabolism	Ammonia assimilation	down	down	DOWNcore	core	1296.9075	1377.47081	6077.81081	4
CH	Nitrogen Metabolism	Ammonia assimilation	up	-	mono	mono	797.62092	284.40694	203.91852	1
CH	Nitrogen Metabolism	Ammonia assimilation	up	up	UPcore	core	341.17503	296.77567	98.32944	1
CH	Nitrogen Metabolism	Cyanate hydrolysis	down	-	mono	mono	90.49451	331.11418	406.5193	1
CH	Nitrogen Metabolism	Denitrification	-	up	poly	poly	8.92085	140.84924	11.602649999999999	3
CH	Nitrogen Metabolism	Denitrification	down	-	mono	mono	3.6396499999999996	29.06379	52.55353	2
CH	Nitrogen Metabolism	Dissimilatory nitrite reductase	down	-	mono	mono	63.19994	153.20851	220.17647	1
CH	Nitrogen Metabolism	Dissimilatory nitrite reductase	down	down	DOWNcore	core	2.3019	1.30694	57.16121	1
CH	Nitrogen Metabolism	Nitrate and nitrite ammonification	-	up	poly	poly	36.61221	344.0597	41.00647	1
CH	Nitrogen Metabolism	Nitrate and nitrite ammonification	down	-	mono	mono	13.5335	204.18319	80.34014	1
CH	Nitrogen Metabolism	Nitrate and nitrite ammonification	down	down	DOWNcore	core	6.06488	10.27396	58.2297	1
CH	Nitrogen Metabolism	Nitrate and nitrite ammonification	up	-	mono	mono	172.44703	88.43894	22.01729	1
CH	Nitrogen Metabolism	Nitrate and nitrite ammonification	up	up	UPcore	core	16.43881	28.58307	2.51485	1
CH	Nitrogen Metabolism	Nitric oxide synthase	down	-	mono	mono	30.95572	106.47364	234.94781	1
CH	Nitrogen Metabolism	Nitric oxide synthase	down	down	DOWNcore	core	15.83598	5.90613	259.63356	1
CH	Nitrogen Metabolism	Nitrosative stress	down	-	mono	mono	0	1.79129	5.18859	1
CH	Nitrogen Metabolism	Nitrosative stress	up	up	UPcore	core	17.44096	59.2009	2.16967	1
CH	Nucleosides and Nucleotides	Adenosyl nucleosidases	-	up	poly	poly	81.51878	403.33599	132.03246	1
CH	Nucleosides and Nucleotides	Adenosyl nucleosidases	up	up	UPcore	core	622.66575	190.38749	4.52564	1
CH	Nucleosides and Nucleotides	AMP to 3-phosphoglycerate	down	down	DOWNcore	core	0.35485	0	8.35911	1
CH	Nucleosides and Nucleotides	De Novo Purine Biosynthesis	-	down	poly	poly	8.14482	2.66668	27.32548	1
CH	Nucleosides and Nucleotides	De Novo Purine Biosynthesis	down	-	mono	mono	277.92679	838.69398	1297.99602	3
CH	Nucleosides and Nucleotides	De Novo Purine Biosynthesis	down	down	DOWNcore	core	1154.74152	1345.92074	5250.53866	4
CH	Nucleosides and Nucleotides	De Novo Pyrimidine Synthesis	down	down	DOWNcore	core	2.23537	2.41701	70.77014	1
CH	Nucleosides and Nucleotides	De Novo Pyrimidine Synthesis	up	-	mono	mono	1202.05796	218.68686	406.0736	1
CH	Nucleosides and Nucleotides	Hydantoin metabolism	-	down	poly	poly	0.90483	0	5.87894	1
CH	Nucleosides and Nucleotides	Hydantoin metabolism	down	-	mono	mono	1.17083	0.68122	7.44959	1
CH	Nucleosides and Nucleotides	Hydantoin metabolism	down	down	DOWNcore	core	72.78920000000001	30.09513	832.78232	3
CH	Nucleosides and Nucleotides	Hydantoin metabolism	up	-	mono	mono	537.8968600000001	72.32057999999999	97.20718000000001	3
CH	Nucleosides and Nucleotides	Novel non-oxidative pathway of Uracil catabolism	up	-	mono	mono	1281.6095599999999	257.90754	359.05862	3
CH	Nucleosides and Nucleotides	Pseudouridine Metabolism	-	down	poly	poly	9.62899	0	2.60982	1
CH	Nucleosides and Nucleotides	Pseudouridine Metabolism	up	-	mono	mono	8.36504	0	0	1
CH	Nucleosides and Nucleotides	Purine conversions	-	down	poly	poly	10.03178	1.03954	28.50437	1
CH	Nucleosides and Nucleotides	Purine conversions	-	up	poly	poly	131.67368	408.38297	59.11363	2
CH	Nucleosides and Nucleotides	Purine conversions	down	down	DOWNcore	core	142.41664	177.35612999999998	862.0921500000001	4
CH	Nucleosides and Nucleotides	Purine conversions	up	-	mono	mono	749.2404499999999	46.185030000000005	48.19952	2
CH	Nucleosides and Nucleotides	Purine conversions	up	up	UPcore	core	162.26866	65.09413	0	1
CH	Nucleosides and Nucleotides	Purine de novo biosynthesis in plants	down	-	mono	mono	698.91993	2610.40403	3769.30963	3
CH	Nucleosides and Nucleotides	Purine de novo biosynthesis in plants	down	down	DOWNcore	core	884.46354	1477.5848799999999	5719.87444	4
CH	Nucleosides and Nucleotides	Purine Utilization	-	down	poly	poly	43.81651	32.18824	122.81137	2
CH	Nucleosides and Nucleotides	Purine Utilization	down	-	mono	mono	4.14893	47.70054	51.05131	1
CH	Nucleosides and Nucleotides	Purine Utilization	down	down	DOWNcore	core	5.87853	4.31883	64.46935	2
CH	Nucleosides and Nucleotides	Purine Utilization	up	-	mono	mono	1634.0266000000001	385.93748	388.29915	3
CH	Nucleosides and Nucleotides	Purine Utilization	up	up	UPcore	core	155.6897	65.3395	4.21151	1
CH	Nucleosides and Nucleotides	pyrimidine conversions	down	-	mono	mono	706.37652	2559.7400700000003	3159.80769	4
CH	Nucleosides and Nucleotides	pyrimidine conversions	up	-	mono	mono	1212.10652	231.29873	202.67207	1
CH	Nucleosides and Nucleotides	pyrimidine conversions	up	up	UPcore	core	52.34828	60.72757	13.81707	1
CH	Nucleosides and Nucleotides	Pyrimidine de novo biosynthesis in plants	down	down	DOWNcore	core	533.13573	1345.2017700000001	4262.50487	2
CH	Nucleosides and Nucleotides	Pyrimidine de novo biosynthesis in plants	up	-	mono	mono	1174.81096	233.46877	526.29258	1
CH	Nucleosides and Nucleotides	Pyrimidine utilization	-	down	poly	poly	113.95448	18.75475	96.57068	2
CH	Nucleosides and Nucleotides	Pyrimidine utilization	up	-	mono	mono	203.1266	13.05166	18.62215	1
CH	Nucleosides and Nucleotides	Ribonucleotide reduction	down	-	mono	mono	84.39687	102.268	259.13487	1
CH	Nucleosides and Nucleotides	Ribonucleotide reduction	down	down	DOWNcore	core	123.66706	120.72124	1397.73703	1
CH	Nucleosides and Nucleotides	Xanthine Metabolism in Bacteria	-	up	poly	poly	8.44061	120.64238	16.4059	1
CH	Nucleotide sugars	GDP-sugars biosynthesis and interconversions in plants	-	down	poly	poly	453.74406	195.29359	595.06086	2
CH	Nucleotide sugars	GDP-sugars biosynthesis and interconversions in plants	-	up	poly	poly	490.94955	1839.4882400000001	485.6703	2
CH	Nucleotide sugars	UDP-glucose and UDP-galactose biosynthesis in plants	down	down	DOWNcore	core	131.25885	181.37724	959.43731	1
CH	Phages and Transposable Elements	CBSS-203122.12.peg.188	down	down	DOWNcore	core	5.89571	38.57052	131.10569	1
CH	Phages and Transposable Elements	Phage cyanophage	down	-	mono	mono	2.08531	5.79889	28.31808	1
CH	Phages and Transposable Elements	Phage cyanophage	down	down	DOWNcore	core	224.10345	315.70175	1250.02022	3
CH	Phages and Transposable Elements	Staphylococcal pathogenicity islands SaPI	-	down	poly	poly	1624.30017	956.21143	4218.06465	1
CH	Phages and Transposable Elements	Staphylococcal pathogenicity islands SaPI	down	-	mono	mono	209.07448	570.76574	1142.58655	1
CH	Phages and Transposable Elements	Staphylococcal pathogenicity islands SaPI	down	down	DOWNcore	core	202.9247	410.71802	1950.26729	1
CH	Phages and Transposable Elements	Staphylococcal pathogenicity islands SaPI	up	-	mono	mono	598.39066	226.33729	272.84787	1
CH	Phages and Transposable Elements	Staphylococcal phi-Mu50B-like prophages	-	down	poly	poly	474.93806	201.63136	921.78765	1
CH	Phages and Transposable Elements	T7-like cyanophage core proteins	down	down	DOWNcore	core	123.66706	120.72124	1397.73703	1
CH	Phosphorus Metabolism	High affinity phosphate transporter and control of PHO regulon	up	-	mono	mono	19.50246	2.83493	2.49933	1
CH	Phosphorus Metabolism	P uptake (cyanobacteria)	down	down	DOWNcore	core	219.49704	314.33931	1159.49647	1
CH	Phosphorus Metabolism	Phosphate metabolism	-	down	poly	poly	91.83651	42.24292	296.59573	1
CH	Phosphorus Metabolism	Phosphate metabolism	-	up	poly	poly	901.23143	4170.42909	502.39312	2
CH	Phosphorus Metabolism	Phosphate metabolism	down	-	mono	mono	197.58592	1605.3354900000002	1988.3315699999998	3
CH	Phosphorus Metabolism	Phosphate metabolism	down	down	DOWNcore	core	226.68732999999997	778.2930200000001	2433.48466	3
CH	Phosphorus Metabolism	Phosphate metabolism	down	up	monoDOWN-polyUP	mixed	11.94427	245.44246	56.81239	1
CH	Phosphorus Metabolism	Phosphate metabolism	up	-	mono	mono	1815.66136	143.54625	339.83648	1
CH	Phosphorus Metabolism	Phosphonate metabolism	-	down	poly	poly	2.21089	0.68122	25.68181	1
CH	Photosynthesis	Photosystem I	-	down	poly	poly	0	0	6.6834299999999995	2
CH	Photosynthesis	Photosystem I	down	down	DOWNcore	core	2.03346	0	54.39077	3
CH	Photosynthesis	Photosystem II	-	down	poly	poly	0.72064	0	0.7698	1
CH	Photosynthesis	Photosystem II	down	-	mono	mono	0	0	0.44014	1
CH	Photosynthesis	Photosystem II	down	down	DOWNcore	core	4.99669	1.36244	107.25931	4
CH	Photosynthesis	Photosystem II-type photosynthetic reaction center	-	down	poly	poly	14.72767	3.57055	46.3778	1
CH	Photosynthesis	Photosystem II-type photosynthetic reaction center	down	-	mono	mono	1.14087	1.8188	14.9147	1
CH	Photosynthesis	Photosystem II-type photosynthetic reaction center	down	down	DOWNcore	core	0.55546	1.24479	17.50353	1
CH	Photosynthesis	Phycobilisome	-	down	poly	poly	0.78055	0	8.77549	1
CH	Photosynthesis	Proteorhodopsin	-	down	poly	poly	33.66417	15.36286	73.94707	1
CH	Photosynthesis	Proteorhodopsin	down	-	mono	mono	73.36079	265.00656000000004	957.62279	2
CH	Plant cell walls and outer surfaces	Suberin biosynthesis in plants	up	-	mono	mono	1406.63447	713.55231	500.5368	1
CH	Plant cell walls and outer surfaces	Xylan degradation in plants	-	up	poly	poly	5.73	110.32967	7.60665	1
CH	Plant cell walls and outer surfaces	Xylan degradation in plants	up	-	mono	mono	111.08319	1.24479	0.62826	1
CH	Plant Glucosinolates	Homomethionine biosynthesis and methionine chain elongation pathway for glucosinolates in plants	down	-	mono	mono	592.01525	1936.35814	2189.30042	2
CH	Plastidial (cyanobacterial) electron transport system	Cytochrome b6-f complex in plants (plastidial) and cyanobacteria	down	down	DOWNcore	core	0	0	7.34274	3
CH	Potassium metabolism	Glutathione-regulated potassium-efflux system and associated functions	-	up	poly	poly	160.44839	354.84039	118.53958	1
CH	Potassium metabolism	Glutathione-regulated potassium-efflux system and associated functions	down	-	mono	mono	90.49198999999999	546.3428200000001	1163.80774	3
CH	Potassium metabolism	Glutathione-regulated potassium-efflux system and associated functions	down	down	DOWNcore	core	17.86294	28.67573	269.22637	1
CH	Potassium metabolism	Glutathione-regulated potassium-efflux system and associated functions	up	up	UPcore	core	6345.363960000001	3738.3492899999997	345.73824	3
CH	Potassium metabolism	Potassium homeostasis	-	down	poly	poly	296.31138	142.64744	405.25022	1
CH	Potassium metabolism	Potassium homeostasis	-	up	poly	poly	336.36901	1071.33924	341.30488	1
CH	Potassium metabolism	Potassium homeostasis	down	-	mono	mono	17.87068	33.77427	90.99676	2
CH	Potassium metabolism	Potassium homeostasis	up	-	mono	mono	693.40706	117.46298	104.71973	2
CH	Potassium metabolism	Potassium homeostasis	up	up	UPcore	core	169.34994	810.00854	76.24458	1
CH	Predictions based on plant-prokaryote comparative analysis	At1g01770	-	down	poly	poly	3.80224	1.79129	39.63132	1
CH	Predictions based on plant-prokaryote comparative analysis	At1g14345	down	down	DOWNcore	core	84.2862	99.68736	1067.49741	1
CH	Predictions based on plant-prokaryote comparative analysis	At1g21350	-	up	poly	poly	735.72022	2026.73199	599.39761	1
CH	Predictions based on plant-prokaryote comparative analysis	At1g21350	down	-	mono	mono	82.4541	103.20821	249.52375	1
CH	Predictions based on plant-prokaryote comparative analysis	At1g21350	down	down	DOWNcore	core	52.76748	73.69082	307.30412	3
CH	Predictions based on plant-prokaryote comparative analysis	At1g21350	up	-	mono	mono	566.43653	201.40245	164.25798	1
CH	Predictions based on plant-prokaryote comparative analysis	At1g24340	up	-	mono	mono	233.92281	4.18378	10.98627	2
CH	Predictions based on plant-prokaryote comparative analysis	At2g23840	down	-	mono	mono	1844.19944	3697.53233	8598.79845	1
CH	Predictions based on plant-prokaryote comparative analysis	At2g23840	down	down	DOWNcore	core	10.44221	11.40774	53.71135	1
CH	Predictions based on plant-prokaryote comparative analysis	At2g23840	up	-	mono	mono	235.85188	94.64932	58.40775	1
CH	Predictions based on plant-prokaryote comparative analysis	At2g25870	up	-	mono	mono	1280.51959	186.54026	144.01497	1
CH	Predictions based on plant-prokaryote comparative analysis	At3g21300	-	down	poly	poly	236.01047	19.86194	408.59956999999997	3
CH	Predictions based on plant-prokaryote comparative analysis	At3g21300	-	up	poly	poly	11.16246	133.95954	4.54299	1
CH	Predictions based on plant-prokaryote comparative analysis	At3g21300	down	down	DOWNcore	core	85.34315	20.7236	428.80233	3
CH	Predictions based on plant-prokaryote comparative analysis	At4g10620 At3g57180 At3g47450	-	down	poly	poly	92.4904	46.47124	196.6515	1
CH	Predictions based on plant-prokaryote comparative analysis	At4g10620 At3g57180 At3g47450	up	up	UPcore	core	361.94445	284.0469	118.66923	1
CH	Predictions based on plant-prokaryote comparative analysis	At4g17370	-	down	poly	poly	2.6420700000000004	0.68122	25.43984	2
CH	Predictions based on plant-prokaryote comparative analysis	At4g17370	down	down	DOWNcore	core	1.14087	1.70337	25.81971	1
CH	Protein Metabolism	Diphthamide biosynthesis	down	-	mono	mono	103.57553	792.47329	410.90627	1
CH	Protein Metabolism	EC 3.4.19.- Omega peptidases	-	up	poly	poly	1.48209	38.12582	3.91291	1
CH	Protein Metabolism	EC 3.4.24.- Metalloendopeptidases	-	up	poly	poly	19.35856	265.02091	51.25226	1
CH	Protein Metabolism	Glycine reductase, sarcosine reductase and betaine reductase	down	-	mono	mono	412.82771	1301.72178	1385.08429	1
CH	Protein Metabolism	GroEL GroES	-	down	poly	poly	1624.30017	956.21143	4218.06465	1
CH	Protein Metabolism	Inteins	down	down	DOWNcore	core	3.36271	2.19673	24.00891	1
CH	Protein Metabolism	Modification of eukaryotic initiation factor 5A	down	-	mono	mono	213.58579	831.46411	860.87934	1
CH	Protein Metabolism	N-linked Glycosylation in Bacteria	up	-	mono	mono	29.18849	5.13824	3.22255	1
CH	Protein Metabolism	Nucleolar protein complex	down	-	mono	mono	0.70969	0	2.49751	1
CH	Protein Metabolism	Peptidyl-prolyl cis-trans isomerase	up	-	mono	mono	1493.2605600000002	836.78833	634.24875	2
CH	Protein Metabolism	Peptidyl-prolyl cis-trans isomerase	up	up	UPcore	core	169.34994	810.00854	76.24458	1
CH	Protein Metabolism	Periplasmic disulfide interchange	-	up	poly	poly	33.8236	228.4375	80.17943	1
CH	Protein Metabolism	Periplasmic disulfide interchange	up	-	mono	mono	235.85188	94.64932	58.40775	1
CH	Protein Metabolism	Periplasmic disulfide interchange	up	up	UPcore	core	310.42822	384.25072	192.02369	1
CH	Protein Metabolism	Prolyl-tRNA synthetase associated editing enzymes	-	down	poly	poly	117.60414	2.22014	19.25951	1
CH	Protein Metabolism	Prolyl-tRNA synthetase associated editing enzymes	-	up	poly	poly	21.94859	397.54718	21.84835	1
CH	Protein Metabolism	Prolyl-tRNA synthetase associated editing enzymes	down	-	mono	mono	443.25939	935.15848	1885.74582	2
CH	Protein Metabolism	Prolyl-tRNA synthetase associated editing enzymes	up	-	mono	mono	1538.82878	242.65392	247.21149	1
CH	Protein Metabolism	Prolyl-tRNA synthetase associated editing enzymes	up	up	UPcore	core	929.63944	107.3252	17.32089	2
CH	Protein Metabolism	Proteasome bacterial	-	up	poly	poly	12.36804	284.98614	48.82682	1
CH	Protein Metabolism	Proteasome bacterial	down	down	DOWNcore	core	675.40366	677.1631	2101.45401	1
CH	Protein Metabolism	Protein Acetylation and Deacetylation in Bacteria	-	up	poly	poly	42.04411	517.48438	64.07031	1
CH	Protein Metabolism	Protein Acetylation and Deacetylation in Bacteria	down	-	mono	mono	12.38129	97.44444	156.43130000000002	2
CH	Protein Metabolism	Protein Acetylation and Deacetylation in Bacteria	up	-	mono	mono	3408.15039	1858.72622	1337.95867	1
CH	Protein Metabolism	Protein chaperones	-	down	poly	poly	1104.0493299999998	807.4428800000001	2496.5993900000003	2
CH	Protein Metabolism	Protein chaperones	down	-	mono	mono	75.77246	760.63104	569.11887	2
CH	Protein Metabolism	Protein chaperones	up	up	UPcore	core	904.01933	168.91902	30.01656	1
CH	Protein Metabolism	Protein degradation	-	up	poly	poly	15.77982	208.3285	54.14603	1
CH	Protein Metabolism	Protein degradation	down	-	mono	mono	10.24126	56.08706	63.33243	1
CH	Protein Metabolism	Protein degradation	down	down	DOWNcore	core	2.32552	0	23.06011	1
CH	Protein Metabolism	Protein degradation	up	up	UPcore	core	722.61955	362.17925	136.28594	1
CH	Protein Metabolism	Protein secretion by ABC-type exporters	up	-	mono	mono	18.85621	20.71808	1.46197	1
CH	Protein Metabolism	Proteolysis in bacteria, ATP-dependent	-	down	poly	poly	46.58839	6.2388200000000005	52.081379999999996	2
CH	Protein Metabolism	Proteolysis in bacteria, ATP-dependent	-	up	poly	poly	337.04057	1607.74964	287.51236	1
CH	Protein Metabolism	Proteolysis in bacteria, ATP-dependent	down	-	mono	mono	28.65507	64.79423	87.30483	1
CH	Protein Metabolism	Proteolysis in bacteria, ATP-dependent	down	down	DOWNcore	core	81.00477	88.10541	649.53116	1
CH	Protein Metabolism	Proteolysis in bacteria, ATP-dependent	up	-	mono	mono	7863.90352	1530.16211	3970.22841	2
CH	Protein Metabolism	Proteolysis in bacteria, ATP-dependent	up	up	UPcore	core	30084.52292	9395.05754	2647.52365	3
CH	Protein Metabolism	Putative TldE-TldD proteolytic complex	down	up	monoDOWN-polyUP	mixed	23.0185	238.53559	119.2053	1
CH	Protein Metabolism	Putative TldE-TldD proteolytic complex	up	up	UPcore	core	53.04587	1025.34052	3.33304	2
CH	Protein Metabolism	Ribosomal protein S12p Asp methylthiotransferase	down	-	mono	mono	1110.29422	3216.0419500000003	6872.41631	2
CH	Protein Metabolism	Ribosomal proteins, zinc requirement	down	-	mono	mono	48.80238	158.85468	511.90398	1
CH	Protein Metabolism	Ribosome activity modulation	-	up	poly	poly	511.10308999999995	5159.7265	602.5786	2
CH	Protein Metabolism	Ribosome activity modulation	up	up	UPcore	core	2929.9300599999997	3474.04371	606.53489	2
CH	Protein Metabolism	Ribosome biogenesis bacterial	down	-	mono	mono	1067.47043	2206.64266	4212.82219	2
CH	Protein Metabolism	Ribosome biogenesis bacterial	up	-	mono	mono	1928.92715	771.17214	620.6281200000001	4
CH	Protein Metabolism	Ribosome biogenesis bacterial	up	up	UPcore	core	1665.25202	2034.19633	851.17821	2
CH	Protein Metabolism	Ribosome LSU bacterial	-	down	poly	poly	2376.6001	1029.29821	4991.2845	1
CH	Protein Metabolism	Ribosome LSU bacterial	down	-	mono	mono	369.50867999999997	1169.27284	2527.98132	2
CH	Protein Metabolism	Ribosome LSU bacterial	down	down	DOWNcore	core	6068.94332	6539.72685	40364.1256	6
CH	Protein Metabolism	Ribosome LSU eukaryotic and archaeal	-	down	poly	poly	8.23078	6.08212	41.16726	6
CH	Protein Metabolism	Ribosome LSU eukaryotic and archaeal	down	-	mono	mono	0.74512	5.02092	8.73534	4
CH	Protein Metabolism	Ribosome LSU eukaryotic and archaeal	down	down	DOWNcore	core	0	0	0.73875	1
CH	Protein Metabolism	Ribosome SSU bacterial	-	down	poly	poly	4295.60473	2484.6090599999998	13908.45993	2
CH	Protein Metabolism	Ribosome SSU bacterial	down	-	mono	mono	1927.14166	4261.61098	12400.159220000001	2
CH	Protein Metabolism	Ribosome SSU bacterial	down	down	DOWNcore	core	1530.4301400000002	2403.95367	14587.69811	4
CH	Protein Metabolism	Ribosome SSU eukaryotic and archaeal	-	down	poly	poly	10.04973	2.7248900000000003	28.29623	8
CH	Protein Metabolism	Ribosome SSU eukaryotic and archaeal	down	-	mono	mono	0	0.62239	1.68113	2
CH	Protein Metabolism	Ribosome SSU eukaryotic and archaeal	down	down	DOWNcore	core	1.45761	0.74005	51.30708	3
CH	Protein Metabolism	Selenocysteine metabolism	down	-	mono	mono	6.38065	37.05187	59.68803	1
CH	Protein Metabolism	Selenocysteine metabolism	down	down	DOWNcore	core	1.6963400000000002	1.13378	40.60744	2
CH	Protein Metabolism	Single-copy ribosomal proteins	-	down	poly	poly	914.38161	620.47374	3394.55594	1
CH	Protein Metabolism	Single-copy ribosomal proteins	down	-	mono	mono	5482.8103200000005	13061.11375	37444.88036	8
CH	Protein Metabolism	Single-copy ribosomal proteins	down	down	DOWNcore	core	1274.2606	1614.10963	7923.94961	3
CH	Protein Metabolism	Thermosome, archaeal	down	down	DOWNcore	core	1.09546	0.74005	10.49591	1
CH	Protein Metabolism	Trans-translation by stalled ribosomes	up	-	mono	mono	598.39066	226.33729	272.84787	1
CH	Protein Metabolism	Translation elongation factor G family	-	down	poly	poly	4689.74475	2625.1594	15976.27094	2
CH	Protein Metabolism	Translation elongation factor G family	down	-	mono	mono	1029.01654	2629.75514	6077.73571	1
CH	Protein Metabolism	Translation elongation factor G family	down	down	DOWNcore	core	0.76284	1.48009	5.65614	1
CH	Protein Metabolism	Translation elongation factors bacterial	down	-	mono	mono	3153.60207	7156.07822	22748.46932	1
CH	Protein Metabolism	Translation elongation factors eukaryotic and archaeal	down	down	DOWNcore	core	22.61911	15.44513	268.77166	1
CH	Protein Metabolism	Translation initiation factors bacterial	up	-	mono	mono	183.6966	125.15936	61.59926	1
CH	Protein Metabolism	Translation termination factors bacterial	-	down	poly	poly	336.62674	216.12427	757.31137	1
CH	Protein Metabolism	tRNA aminoacylation, Asp and Asn	-	down	poly	poly	167.0876	10.9988	173.80058	2
CH	Protein Metabolism	tRNA aminoacylation, Asp and Asn	down	down	DOWNcore	core	32.91558	16.02005	222.81916	1
CH	Protein Metabolism	tRNA aminoacylation, Glu and Gln	-	down	poly	poly	68.92287	8.86314	234.79899	1
CH	Protein Metabolism	tRNA aminoacylation, Glu and Gln	down	down	DOWNcore	core	52.42757	4.70355	205.98317	2
CH	Protein Metabolism	tRNA aminoacylation, Glu and Gln	down	up	monoDOWN-polyUP	mixed	54.89656	572.87567	199.67137	1
CH	Protein Metabolism	tRNA synthetase relationships	-	down	poly	poly	342.15435	17.49378	649.10153	1
CH	Protein Metabolism	tRNA synthetase relationships	-	up	poly	poly	106.27396	1232.48389	246.72209	1
CH	Protein Metabolism	tRNA synthetase relationships	down	-	mono	mono	19.15758	152.49731	265.95438	1
CH	Protein Metabolism	Universal GTPases	down	-	mono	mono	822.36955	1882.9787900000001	5151.3759	2
CH	Protein Metabolism	Universal GTPases	down	down	DOWNcore	core	117.87762	187.65229	695.74931	1
CH	Protein Metabolism	Universal GTPases	up	-	mono	mono	5129.19557	955.80645	839.94452	3
CH	Regulation and Cell signaling	cAMP signaling in bacteria	-	down	poly	poly	5.01147	1.61481	19.79098	1
CH	Regulation and Cell signaling	cAMP signaling in bacteria	down	-	mono	mono	13.37842	105.68382	266.73424	1
CH	Regulation and Cell signaling	cAMP signaling in bacteria	down	down	DOWNcore	core	675.40366	677.1631	2101.45401	1
CH	Regulation and Cell signaling	cAMP signaling in bacteria	up	-	mono	mono	3138.9145799999997	425.26181	682.69798	2
CH	Regulation and Cell signaling	cAMP signaling in bacteria	up	up	UPcore	core	614.81773	372.22074	104.63387	2
CH	Regulation and Cell signaling	CytR regulation	up	-	mono	mono	28.75275	0	0.28308	1
CH	Regulation and Cell signaling	DNA-binding regulatory proteins, strays	-	down	poly	poly	6.35022	1.18928	9.65031	1
CH	Regulation and Cell signaling	DNA-binding regulatory proteins, strays	up	-	mono	mono	737.61835	203.62258999999997	170.59077	5
CH	Regulation and Cell signaling	DNA-binding regulatory proteins, strays	up	up	UPcore	core	241.10561	123.25573	3.91291	1
CH	Regulation and Cell signaling	Iojap	-	down	poly	poly	94.31831	47.152460000000005	203.89927	2
CH	Regulation and Cell signaling	Iojap	down	-	mono	mono	640.78835	2057.83387	4326.58534	2
CH	Regulation and Cell signaling	Iojap	up	-	mono	mono	1962.36019	830.6083	916.98334	3
CH	Regulation and Cell signaling	Murein hydrolase regulation and cell death	down	-	mono	mono	61.30986	361.80449	257.26207	1
CH	Regulation and Cell signaling	Murein hydrolase regulation and cell death	down	down	DOWNcore	core	9.7417	12.37231	111.06795	1
CH	Regulation and Cell signaling	Murein hydrolase regulation and cell death	up	up	UPcore	core	52.34828	60.72757	13.81707	1
CH	Regulation and Cell signaling	Orphan regulatory proteins	-	up	poly	poly	15.14993	157.6258	31.23292	2
CH	Regulation and Cell signaling	Orphan regulatory proteins	down	-	mono	mono	7.94924	85.76754	36.2955	1
CH	Regulation and Cell signaling	Orphan regulatory proteins	up	-	mono	mono	27.99108	3.32608	0.31413	1
CH	Regulation and Cell signaling	Orphan regulatory proteins	up	up	UPcore	core	4095.3248999999996	1530.98324	156.86781	8
CH	Regulation and Cell signaling	Oxygen and light sensor PpaA-PpsR	up	-	mono	mono	455.1883	108.4948	77.2207	1
CH	Regulation and Cell signaling	Plastidial (p)ppGpp-mediated response in plants	down	up	monoDOWN-polyUP	mixed	68.17154	979.67862	366.15297	1
CH	Regulation and Cell signaling	Quorum sensing regulation in Pseudomonas	-	up	poly	poly	244.13653	415.24855	139.25023	1
CH	Regulation and Cell signaling	Sex pheromones in Enterococcus faecalis and other Firmicutes	-	down	poly	poly	144.71064	38.79756	278.71129	1
CH	Regulation and Cell signaling	Streptococcal Mga Regulon	-	up	poly	poly	31.07105	539.43701	46.60329	1
CH	Regulation and Cell signaling	Stringent Response, (p)ppGpp metabolism	down	-	mono	mono	73.64097	431.71532	788.7121	1
CH	Regulation and Cell signaling	Stringent Response, (p)ppGpp metabolism	up	-	mono	mono	1289.89518	23.03339	35.81338	1
CH	Regulation and Cell signaling	The Chv regulatory system of Alphaproteobacteria	down	down	DOWNcore	core	2.09991	2.06737	16.10912	1
CH	Regulation and Cell signaling	Toxin-antitoxin replicon stabilization systems	up	up	UPcore	core	65.8448	23.41508	1.69848	1
CH	Regulation and Cell signaling	Toxin-antitoxin systems (other than RelBE and MazEF)	up	-	mono	mono	172.389	35.18335	9.78821	1
CH	Regulation and Cell signaling	Two-component regulatory systems in Campylobacter	up	up	UPcore	core	16359.455109999999	8932.43747	1796.69307	3
CH	Regulation and Cell signaling	Zinc regulated enzymes	-	up	poly	poly	34.33342	51.29895	12.6537	1
CH	Regulation and Cell signaling	Zinc regulated enzymes	down	-	mono	mono	90.49451	331.11418	406.5193	1
CH	Regulation and Cell signaling	Zinc regulated enzymes	down	down	DOWNcore	core	9.53136	24.11374	154.23058	1
CH	Regulation and Cell signaling	Zinc regulated enzymes	up	-	mono	mono	1174.81096	233.46877	526.29258	1
CH	Respiration	Anaerobic respiratory reductases	-	down	poly	poly	437.19159	136.90768	1010.55518	1
CH	Respiration	Anaerobic respiratory reductases	down	-	mono	mono	293.35732	3285.71593	3364.02464	1
CH	Respiration	Anaerobic respiratory reductases	down	down	DOWNcore	core	17.59208	14.789810000000001	107.76059000000001	2
CH	Respiration	ATP Synthases HGM	down	-	mono	mono	2875.07945	5990.7932900000005	13427.60902	3
CH	Respiration	Biogenesis of c-type cytochromes	-	up	poly	poly	128.97947	964.97371	338.00939000000005	2
CH	Respiration	Biogenesis of c-type cytochromes	down	down	DOWNcore	core	5.23795	8.12908	47.82694	2
CH	Respiration	Biogenesis of c-type cytochromes	up	-	mono	mono	235.85188	94.64932	58.40775	1
CH	Respiration	Biogenesis of c-type cytochromes	up	down	monoUP-polyDOWN	mixed	1534.98478	20.90244	136.03573	1
CH	Respiration	Biogenesis of cytochrome c oxidases	-	up	poly	poly	6.82546	97.7205	19.5563	1
CH	Respiration	Biogenesis of cytochrome c oxidases	down	-	mono	mono	92.44922	465.44736	583.11199	4
CH	Respiration	Biogenesis of cytochrome c oxidases	down	down	DOWNcore	core	333.73498	224.56091	2410.11297	1
CH	Respiration	Biogenesis of cytochrome c oxidases	down	up	monoDOWN-polyUP	mixed	9.30314	164.98918	54.041	1
CH	Respiration	Biogenesis of cytochrome c oxidases	up	-	mono	mono	855.50013	179.46747	160.66831	1
CH	Respiration	Carbon monoxide dehydrogenase maturation factors	-	down	poly	poly	10.75174	3.74101	50.284290000000006	2
CH	Respiration	Carbon monoxide dehydrogenase maturation factors	down	down	DOWNcore	core	21.84441	11.02	128.79725000000002	2
CH	Respiration	CO Dehydrogenase	-	down	poly	poly	184.25764999999998	53.68664	647.03553	3
CH	Respiration	CO Dehydrogenase	down	down	DOWNcore	core	41.51097	20.568759999999997	193.30407	2
CH	Respiration	F0F1-type ATP synthase	down	-	mono	mono	709.91182	1518.35789	3345.28725	1
CH	Respiration	F0F1-type ATP synthase	down	down	DOWNcore	core	13.5938	13.28216	97.99241	1
CH	Respiration	Flavocytochrome C	-	up	poly	poly	0	9.39949	0	1
CH	Respiration	Formate hydrogenase	-	down	poly	poly	293.14059	46.72554	540.68789	4
CH	Respiration	Formate hydrogenase	down	down	DOWNcore	core	2.2708	2.28876	14.36042	1
CH	Respiration	Formate hydrogenase	up	up	UPcore	core	422.19906	191.00692	13.10755	1
CH	Respiration	Hydrogenases	down	-	mono	mono	5.5618799999999995	17.85023	40.28967	2
CH	Respiration	Na(+)-translocating NADH-quinone oxidoreductase and rnf-like group of electron transport complexes	down	-	mono	mono	97.55969	210.48639	495.08610999999996	4
CH	Respiration	Na(+)-translocating NADH-quinone oxidoreductase and rnf-like group of electron transport complexes	down	down	DOWNcore	core	1.70233	2.63426	23.38794	1
CH	Respiration	Na(+)-translocating NADH-quinone oxidoreductase and rnf-like group of electron transport complexes	up	down	monoUP-polyDOWN	mixed	183.12674	8.02664	69.10184	1
CH	Respiration	Na+ translocating decarboxylases and related biotin-dependent enzymes	down	-	mono	mono	981.04451	3226.87495	4333.6088899999995	2
CH	Respiration	Quinone oxidoreductase family	down	-	mono	mono	22.88878	69.70488	296.5828	1
CH	Respiration	Respiration / HGM	-	up	poly	poly	1.35929	27.58466	2.04366	1
CH	Respiration	Respiration / HGM	down	-	mono	mono	513.49294	2732.12593	4937.79262	4
CH	Respiration	Respiration / HGM	down	down	DOWNcore	core	2.3019	1.30694	57.16121	1
CH	Respiration	Respiration / HGM	up	-	mono	mono	917.62831	3.40134	7.51715	1
CH	Respiration	Respiration / Human gut microbiome	-	up	poly	poly	5.06322	67.39771	8.39562	1
CH	Respiration	Respiration / Human gut microbiome	down	-	mono	mono	1217.19148	2565.95737	3736.10093	1
CH	Respiration	Respiration / Human gut microbiome	up	-	mono	mono	4695.95946	92.91778000000001	117.36328	3
CH	Respiration	Respiration HGM	-	up	poly	poly	7.32307	118.29769	29.05414	1
CH	Respiration	Respiration HGM	down	-	mono	mono	408.3817	4093.8816699999998	4339.90514	3
CH	Respiration	Respiration HGM	down	down	DOWNcore	core	2.43113	0.87809	18.82761	1
CH	Respiration	Respiratory Complex I	down	-	mono	mono	438.12585	2151.64696	2306.04159	12
CH	Respiration	Respiratory dehydrogenases 1	-	down	poly	poly	462.1468	37.33807	450.64088	1
CH	Respiration	Respiratory dehydrogenases 1	down	-	mono	mono	52.6063	158.31808	413.78556	1
CH	Respiration	Respiratory dehydrogenases 1	down	down	DOWNcore	core	14.347270000000002	130.26201	1027.6969100000001	2
CH	Respiration	Respiratory dehydrogenases 1	up	-	mono	mono	2663.28892	237.63666999999998	501.80605	5
CH	Respiration	Soluble cytochromes and functionally related electron carriers	-	up	poly	poly	8.23948	120.21987	15.011489999999998	3
CH	Respiration	Soluble cytochromes and functionally related electron carriers	down	-	mono	mono	1.48574	155.85755	166.3621	1
CH	Respiration	Soluble cytochromes and functionally related electron carriers	down	down	DOWNcore	core	38.09611	99.80685	306.23936	2
CH	Respiration	Soluble cytochromes and functionally related electron carriers	down	up	monoDOWN-polyUP	mixed	65.58667	800.50105	339.9488	1
CH	Respiration	Soluble cytochromes and functionally related electron carriers	up	-	mono	mono	340.15041	88.32011	141.74755	1
CH	Respiration	Succinate dehydrogenase	-	up	poly	poly	39.80393	339.91081	12.3688	1
CH	Respiration	Terminal cytochrome C oxidases	down	-	mono	mono	327.24673	3654.55839	2377.28264	5
CH	Respiration	Terminal cytochrome C oxidases	down	down	DOWNcore	core	139.83459	155.63523	2018.1789	4
CH	Respiration	Terminal cytochrome d ubiquinol oxidases	up	-	mono	mono	532.40689	141.52218	58.46525	1
[truncated: 984 more rows]

## Sheet: seed3
compound_class	seed1	seed2	seed3	mono_logFC	mono_meanCPM	mono_FDR	mono_sign	poly_logFC	poly_meanCPM	poly_FDR	poly_sign	cont_meanCPM	sign_group	sign_t_group
CH	Carbohydrates	Lactate utilization temp	Predicted D-lactate dehydrogenase, Fe-S protein, FAD/FMN-containing	3.87899	551.98481	0.03053	up	0.08277	43.99118	0.98921	-	51.8375	mono	mono
CH	Carbohydrates	Methylglyoxal Metabolism	Methylglyoxal synthase (EC 4.2.3.3)	4.02575	198.18124	0.00245	up	1.49254	37.63469	0.15926	-	17.0104	mono	mono
CH	Vitamins	Experimental tye	Sirohydrochlorin cobaltochelatase (EC 4.99.1.3)	4.05541	130.19786	0.00588	up	-1.68384	4.09397	0.18006	-	10.87942	mono	mono
CH	Unclassified	Heme LB	Sirohydrochlorin cobaltochelatase (EC 4.99.1.3)	4.05541	130.19786	0.00588	up	-1.68384	4.09397	0.18006	-	10.87942	mono	mono
CH	DNA Metabolism	DNA repair, bacterial	Methyl-directed repair DNA adenine methylase (EC 2.1.1.72)	2.33361	3.76681	0.11403	-	6.64349	85.13185	0.00133	up	1.03735	poly	poly
CH	Protein Metabolism	Ribosome SSU bacterial	SSU ribosomal protein S19p (S15e)	-2.78461	739.32297	0.00534	down	-2.81966	794.3026	0.0064	down	6842.35722	DOWNcore	core
CH	Protein Metabolism	Translation elongation factor G family	Translation elongation factor G	-1.33567	4688.64564	0.09017	-	-2.30354	2623.67931	0.00999	down	15967.53379	poly	poly
CH	Virulence	Mycobacterium virulence operon involved in protein synthesis (SSU ribosomal proteins)	Translation elongation factor G	-1.33567	4688.64564	0.09017	-	-2.30354	2623.67931	0.00999	down	15967.53379	poly	poly
CH	Carbohydrates	Beta-Glucoside Metabolism	Beta-glucanase precursor (EC 3.2.1.73)	-2.27766	5.77742	0.01728	down	1.23152	71.26429	0.2008	-	37.84333	mono	mono
CH	Carbohydrates	Inositol catabolism	Inositol transport system ATP-binding protein	6.01363	145.53654	0.0008	up	-0.93177	1.28622	0.51291	-	3.04814	mono	mono
CH	Membrane Transport	Inositol catabolism	Inositol transport system ATP-binding protein	6.01363	145.53654	0.0008	up	-0.93177	1.28622	0.51291	-	3.04814	mono	mono
CH	Vitamins	Biotin biosynthesis in plants	Adenosylmethionine-8-amino-7-oxononanoate aminotransferase (EC 2.6.1.62)	-1.77755	128.11571	0.00387	down	-1.14441	216.03719	0.04798	down	586.53057	DOWNcore	core
Nuc	Nucleosides and Nucleotides	Pyrimidine utilization	Pyridine nucleotide-disulphide oxidoreductase associated with reductive pyrimidine catabolism	4.03492	311.43481	0.01285	up	4.16337	290.26688	0.01491	up	18.62215	UPcore	core
CH	DNA Metabolism	DNA repair, bacterial	DNA recombination-dependent growth factor C	0.55622	37.21104	0.54863	-	2.27457	129.49907	0.03207	up	32.79264	poly	poly
CH	Membrane Transport	ABC transporter alkylphosphonate (TC 3.A.1.9.1)	Phosphonate ABC transporter permease protein phnE2 (TC 3.A.1.9.1)	4.65698	122.3175	0.00191	up	-2.65931	0.83207	0.05117	-	6.49168	mono	mono
CH	Metabolism of Aromatic Compounds	N-heterocyclic aromatic compound degradation	Isoquinoline 1-oxidoreductase alpha subunit (EC 1.3.99.16)	-2.65057	16.70006	0.00522	down	0.65283	175.98932	0.47021	-	142.98308	mono	mono
Nuc	Amino Acids	Arginine and Ornithine Degradation	Arginine N-succinyltransferase (EC 2.3.1.109)	5.3068	143.46738	0.00589	up	5.18862	116.73237	0.00728	up	3.56591	UPcore	core
CH	Carbohydrates	Glycolate, glyoxylate interconversions	Phosphoglycolate phosphatase (EC 3.1.3.18)	1.98875	183.38336	0.01303	up	-0.70517	31.49997	0.33263	-	63.54613	mono	mono
CH	Miscellaneous	Metabolite repair	Phosphoglycolate phosphatase (EC 3.1.3.18)	1.98875	183.38336	0.01303	up	-0.70517	31.49997	0.33263	-	63.54613	mono	mono
CH	DNA Metabolism	2-phosphoglycolate salvage	Phosphoglycolate phosphatase (EC 3.1.3.18)	1.98875	183.38336	0.01303	up	-0.70517	31.49997	0.33263	-	63.54613	mono	mono
CH	Amino Acids	Common Pathway For Synthesis of Aromatic Compounds (DAHP synthase to chorismate)	2-keto-3-deoxy-D-arabino-heptulosonate-7-phosphate synthase I alpha (EC 2.5.1.54)	-2.15279	145.04406	0.0007	down	0.45446	961.46386	0.41237	-	870.39922	mono	mono
Nuc	Respiration	Respiration / Human gut microbiome	Nitric oxide reductase activation protein NorQ	3.87084	117.99015	0.00761	up	4.03374	106.10549	0.00697	up	8.39562	UPcore	core
Nuc	Nitrogen Metabolism	Denitrification	Nitric oxide reductase activation protein NorQ	3.87084	117.99015	0.00761	up	4.03374	106.10549	0.00697	up	8.39562	UPcore	core
CH	Unclassified	Unclassified	1,2-dihydroxynaphthalene dioxygenase	NA	12.3258	0.02995	up	NA	0	0.59742	-	0.28308	mono	mono
CH	Vitamins	Heme Biosynthesis: protoporphyrin- and coproporphyrin-dependent pathways	Glutamate-1-semialdehyde aminotransferase (EC 5.4.3.8)	0.04654	360.53061	0.93352	-	1.24784	900.17277	0.01661	up	469.63266	poly	poly
CH	Unclassified	PROSC YggS	Glutamate-1-semialdehyde aminotransferase (EC 5.4.3.8)	0.04654	360.53061	0.93352	-	1.24784	900.17277	0.01661	up	469.63266	poly	poly
CH	RNA Metabolism	Test Q	Inosine-uridine preferring nucleoside hydrolase (EC 3.2.2.1)	4.20266	121.75835	0.00135	up	0.4945	10.41783	0.63692	-	8.73897	mono	mono
CH	Nucleosides and Nucleotides	Purine conversions	Inosine-uridine preferring nucleoside hydrolase (EC 3.2.2.1)	4.20266	121.75835	0.00135	up	0.4945	10.41783	0.63692	-	8.73897	mono	mono
Nuc	Carbohydrates	Chitin and N-acetylglucosamine utilization	N-acetylglucosamine kinase of eukaryotic type (EC 2.7.1.59)	7.24237	68.64689	0.00584	up	7.34938	60.27115	0.00636	up	0.84924	UPcore	core
CH	Stress Response	Rubrerythrin	Rubredoxin	-3.03282	16.29049	0.00212	down	-4.05529	8.93175	3.9e-4	down	176.78307	DOWNcore	core
CH	Carbohydrates	D-galactarate, D-glucarate and D-glycerate catabolism - gjo	D-glycerate 2-kinase (EC 2.7.1.-)	-2.28374	3.0623	0.10309	-	-3.23582	1.75617	0.04954	down	13.45637	poly	poly
CH	Carbohydrates	Maltose and Maltodextrin Utilization	Putative sucrose phosphorylase (EC 2.4.1.7)	7.04822	249.97124	0.005	up	3.77268	27.95809	0.06409	-	2.43723	mono	mono
CH	Miscellaneous	Metabolite repair	Inosine/xanthosine triphosphatase (EC 3.6.1.-)	7.04166	32.5108	0.018	up	7.50541	48.35423	0.0184	up	0.2986	UPcore	core
CH	Stress Response	Housecleaning nucleoside triphosphate pyrophosphatases	Inosine/xanthosine triphosphatase (EC 3.6.1.-)	7.04166	32.5108	0.018	up	7.50541	48.35423	0.0184	up	0.2986	UPcore	core
CH	Amino Acids	Alanine, serine, glycine metabolism in plants	Phosphoserine aminotransferase (EC 2.6.1.52)	-1.75487	246.19024	0.00811	down	-1.02556	447.40802	0.10554	-	1152.59574	mono	mono
CH	Vitamins	Pyridoxin (Vitamin B6) Biosynthesis	Phosphoserine aminotransferase (EC 2.6.1.52)	-1.75487	246.19024	0.00811	down	-1.02556	447.40802	0.10554	-	1152.59574	mono	mono
CH	Sulfur Metabolism	At5g37530 (CsdL protein family)	Iron-sulfur cluster assembly protein SufB	-0.51814	474.93806	0.45849	-	-1.90599	201.63136	0.01434	down	921.78765	poly	poly
CH	Vitamins	Fe-S cluster assembly	Iron-sulfur cluster assembly protein SufB	-0.51814	474.93806	0.45849	-	-1.90599	201.63136	0.01434	down	921.78765	poly	poly
CH	Phages and Transposable Elements	Staphylococcal phi-Mu50B-like prophages	Iron-sulfur cluster assembly protein SufB	-0.51814	474.93806	0.45849	-	-1.90599	201.63136	0.01434	down	921.78765	poly	poly
CH	Miscellaneous	YgfZ-Fe-S	Iron-sulfur cluster assembly protein SufB	-0.51814	474.93806	0.45849	-	-1.90599	201.63136	0.01434	down	921.78765	poly	poly
CH	DNA Metabolism	CRISPRs	CRISPR-associated protein, Cse1 family	8.65354	10.09717	0.0464	up	7.58074	5.21793	0.08687	-	0	mono	mono
CH	Stress Response	Universal stress protein family	Universal stress protein family COG0589	3.60593	490.75556	0.00325	up	-3.66685	3.42793	0.00258	down	56.38508	monoUP-polyDOWN	mixed
CH	Amino Acids	Aromatic amino acid degradation	5-carboxymethyl-2-oxo-hex-3- ene-1,7-dioate decarboxylase (EC 4.1.1.68)	2.3931	14.60083	0.03676	up	-0.16226	2.79793	0.91841	-	3.70927	mono	mono
CH	Metabolism of Aromatic Compounds	Central meta-cleavage pathway of aromatic compound degradation	5-carboxymethyl-2-oxo-hex-3- ene-1,7-dioate decarboxylase (EC 4.1.1.68)	2.3931	14.60083	0.03676	up	-0.16226	2.79793	0.91841	-	3.70927	mono	mono
CH	Unclassified	Unclassified	Enterobactin exporter EntS	NA	36.19834	0.00876	up	NA	0	1	-	0	mono	mono
CH	Carbohydrates	D-galactarate, D-glucarate and D-glycerate catabolism - gjo	Glucarate dehydratase (EC 4.2.1.40)	6.26703	585.18269	0.00695	up	-3.38055	0.99242	0.11404	-	10.31326	mono	mono
CH	Virulence	Multidrug efflux pump in Campylobacter jejuni (CmeABC operon)	RND efflux system, membrane fusion protein CmeA	2.11815	27.75127	0.239	-	5.3512	279.35398	0.02134	up	8.82206	poly	poly
CH	Unclassified	Unclassified	Predicted maltose-specific TonB-dependent receptor	6.30862	42.23811	0.00252	up	9.05435	323.08784000000003	4.1e-4	up	0.72322	UPcore	core
CH	Respiration	Formate hydrogenase	NAD-dependent formate dehydrogenase alpha subunit	-0.61954	178.28132	0.26465	-	-3.02718	30.74471	0.0001	down	366.76857	poly	poly
Nuc	Metabolism of Aromatic Compounds	Anaerobic Aromatic Degredation (benzoate)	Benzoate-CoA ligase (EC 6.2.1.25)	-3.11231	5.76605	0.01416	down	-3.20294	4.85	0.01626	down	49.79844	DOWNcore	core
Nuc	Nucleosides and Nucleotides	Adenosyl nucleosidases	Purine nucleoside phosphorylase (EC 2.4.2.1)	3.36129	1317.16284	9.9e-4	up	3.21357	1019.68896	0.00135	up	132.03246	UPcore	core
Nuc	Carbohydrates	Deoxyribose and Deoxynucleoside Catabolism	Purine nucleoside phosphorylase (EC 2.4.2.1)	3.36129	1317.16284	9.9e-4	up	3.21357	1019.68896	0.00135	up	132.03246	UPcore	core
CH	Motility and Chemotaxis	Bacterial motility:Gliding	gliding motility protein GldF	-2.65409	8.347	0.05525	-	-3.02089	7.34161	0.04358	down	73.25307	poly	poly
CH	Metabolite processes	RidA family in 981 representative prokaryotes	Cystathionine beta-lyase (EC 4.4.1.8)	-0.22824	11.22016	0.87251	-	3.62362	178.45217	0.02104	up	17.98383	poly	poly
CH	Amino Acids	Methionine and cysteine metabolism in plants	Cystathionine beta-lyase (EC 4.4.1.8)	-0.22824	11.22016	0.87251	-	3.62362	178.45217	0.02104	up	17.98383	poly	poly
CH	Sulfur Metabolism	L-Cystine Uptake and Metabolism	Cystathionine beta-lyase (EC 4.4.1.8)	-0.22824	11.22016	0.87251	-	3.62362	178.45217	0.02104	up	17.98383	poly	poly
CH	Unclassified	Unclassified	Monoamine oxidase (1.4.3.4)	NA	55.13589	0.02503	up	NA	0	0.2325	-	1.0063	mono	mono
CH	Metabolism of Aromatic Compounds	Chloroaromatic degradation pathway	Beta-ketoadipate enol-lactone hydrolase (EC 3.1.1.24)	2.7931	478.09317	0.02543	up	-1.08625	34.21909	0.33127	-	90.47803	mono	mono
CH	Fatty Acids and Lipids	Acyclic terpenes utilization	Geranyl-CoA carboxylase biotin-containing subunit (EC 6.4.1.5)	-3.01347	3.80224	0.07522	-	-4.68728	1.79129	0.02326	down	39.63132	poly	poly
CH	Predictions based on plant-prokaryote comparative analysis	At1g01770	Geranyl-CoA carboxylase biotin-containing subunit (EC 6.4.1.5)	-3.01347	3.80224	0.07522	-	-4.68728	1.79129	0.02326	down	39.63132	poly	poly
CH	Central metabolism	EC 6.4.1.- Ligases that form carbon-carbon bonds	Geranyl-CoA carboxylase biotin-containing subunit (EC 6.4.1.5)	-3.01347	3.80224	0.07522	-	-4.68728	1.79129	0.02326	down	39.63132	poly	poly
Nuc	Cell Wall and Capsule	Recycling of Peptidoglycan Amino Acids	L-alanine-DL-glutamate epimerase	-1.42211	3.60592	0.28475	-	-3.03925	1.01137	0.03703	down	10.23382	poly	poly
Nuc	Miscellaneous	Muconate lactonizing enzyme family	L-alanine-DL-glutamate epimerase	-1.42211	3.60592	0.28475	-	-3.03925	1.01137	0.03703	down	10.23382	poly	poly
CH	Predictions based on plant-prokaryote comparative analysis	At2g23840	DNA-directed RNA polymerase alpha subunit (EC 2.7.7.6)	-1.7831	1844.19944	0.02985	down	-0.90175	3697.53233	0.27187	-	8598.79845	mono	mono
CH	RNA Metabolism	RNA polymerase bacterial	DNA-directed RNA polymerase alpha subunit (EC 2.7.7.6)	-1.7831	1844.19944	0.02985	down	-0.90175	3697.53233	0.27187	-	8598.79845	mono	mono
Nuc	Nucleosides and Nucleotides	Hydantoin metabolism	hydantoin racemase	NA	0.75377	0.07704	-	NA	0	0.0131	down	3.36409	poly	poly
CH	Amino Acids	Methionine in Streptococci	Cystathionine gamma-synthase (EC 2.5.1.48)	1.73471	162.44116	0.04035	up	3.0753	443.89015	0.00319	up	65.92031	UPcore	core
CH	Vitamins	YgfZ	Cystathionine gamma-synthase (EC 2.5.1.48)	1.73471	162.44116	0.04035	up	3.0753	443.89015	0.00319	up	65.92031	UPcore	core
CH	Metabolite processes	TN RidA: all subgroups, 981 genomes PLP	Cystathionine gamma-synthase (EC 2.5.1.48)	1.73471	162.44116	0.04035	up	3.0753	443.89015	0.00319	up	65.92031	UPcore	core
CH	Sulfur Metabolism	L-Cystine Uptake and Metabolism	Cystathionine gamma-synthase (EC 2.5.1.48)	1.73471	162.44116	0.04035	up	3.0753	443.89015	0.00319	up	65.92031	UPcore	core
Nuc	Vitamins	Ubiquinone biosynthesis -- gjo	NAD(P)H-flavin reductase (EC 1.5.1.29) (EC 1.16.1.3)	4.59808	128.8458	0.01187	up	4.43084	95.3899	0.01685	up	5.42328	UPcore	core
CH	Vitamins	Pterin carbinolamine dehydratase	Aromatic-amino-acid aminotransferase (EC 2.6.1.57)	-4.69392	0.39028	0.01665	down	-2.6348	0.99242	0.12694	-	5.87894	mono	mono
CH	Metabolism of Aromatic Compounds	Homogentisate pathway of aromatic compound degradation	Aromatic-amino-acid aminotransferase (EC 2.6.1.57)	-4.69392	0.39028	0.01665	down	-2.6348	0.99242	0.12694	-	5.87894	mono	mono
CH	Unclassified	Unclassified	L-rhamnose mutarotase	7.40935	3.97697	0.0244	up	4.26745	1.24479	0.19172	-	0	mono	mono
CH	Amino Acids	Aromatic amino acid degradation	5-carboxymethyl-2-hydroxymuconate delta-isomerase (EC 5.3.3.10)	3.09333	21.59112	0.03817	up	1.42668	7.41562	0.31904	-	3.42619	mono	mono
CH	Metabolism of Aromatic Compounds	Central meta-cleavage pathway of aromatic compound degradation	5-carboxymethyl-2-hydroxymuconate delta-isomerase (EC 5.3.3.10)	3.09333	21.59112	0.03817	up	1.42668	7.41562	0.31904	-	3.42619	mono	mono
CH	Cell Wall and Capsule	Lipid A modifications	Transcriptional regulatory protein PhoP	-2.77952	4.26721	0.02646	down	0.0251	32.47591	1	-	38.79942	mono	mono
Nuc	Virulence	Mycobacterium virulence operon involved in fatty acids biosynthesis	Propionyl-CoA carboxylase beta chain (EC 6.4.1.3)	-2.27441	14.6203	0.00611	down	-0.82521	37.51809	0.30001	-	75.04192	mono	mono
Nuc	Carbohydrates	Serine-glyoxylate cycle	Propionyl-CoA carboxylase beta chain (EC 6.4.1.3)	-2.27441	14.6203	0.00611	down	-0.82521	37.51809	0.30001	-	75.04192	mono	mono
Nuc	Unclassified	Unclassified	TcuR: regulates tcuABC genes used in utilization of tricarballylate	-6.23865	0.22774	0.03368	down	-1.74388	2.27797	0.48923	-	8.99283	mono	mono
Nuc	Unclassified	Unclassified	Respiratory nitrate reductase delta chain (EC 1.7.99.4)	5.63424	52.58421	0.03566	up	4.60074	20.7081	0.08164	-	1.05288	mono	mono
CH	Protein Metabolism	Ribosome LSU eukaryotic and archaeal	LSU ribosomal protein L9e (L6p)	NA	0	0.03109	down	NA	0	0.2326	-	0.94239	mono	mono
Nuc	Carbohydrates	Fermentations: Mixed acid	Acetaldehyde dehydrogenase (EC 1.2.1.10)	-4.01102	15.15152	0.0053	down	-2.58794	37.98427	0.04905	down	249.74005	DOWNcore	core
Nuc	Unclassified	CBSS-195102.1.peg.963	Acetaldehyde dehydrogenase (EC 1.2.1.10)	-4.01102	15.15152	0.0053	down	-2.58794	37.98427	0.04905	down	249.74005	DOWNcore	core
Nuc	Amino Acids	Tryptophan catabolism	Acetaldehyde dehydrogenase (EC 1.2.1.10)	-4.01102	15.15152	0.0053	down	-2.58794	37.98427	0.04905	down	249.74005	DOWNcore	core
Nuc	Metabolism of Aromatic Compounds	Central meta-cleavage pathway of aromatic compound degradation	Acetaldehyde dehydrogenase (EC 1.2.1.10)	-4.01102	15.15152	0.0053	down	-2.58794	37.98427	0.04905	down	249.74005	DOWNcore	core
CH	Protein Metabolism	Ribosome SSU bacterial	SSU ribosomal protein S9p (S16e)	-2.92227	266.98630000000003	0.00343	down	-1.903	587.49933	0.04026	down	2765.12539	DOWNcore	core
CH	Motility and Chemotaxis	Flagellum	Flagellar hook-associated protein FlgK	4.0119	1161.09935	0.00206	up	4.35231	1638.3476	0.00164	up	100.6233	UPcore	core
CH	Virulence	C jejuni colonization of chick caeca	Flagellar hook-associated protein FlgK	4.0119	1161.09935	0.00206	up	4.35231	1638.3476	0.00164	up	100.6233	UPcore	core
CH	Fatty Acids and Lipids	Carotenoids	Lycopene cyclase	-5.23283	1.07002	0.01148	down	-5.32762	2.22014	0.01641	down	39.64406	DOWNcore	core
CH	Amino Acids	Glutamine synthetases	Glutamine synthetase type I (EC 6.3.1.2)	-1.77795	770.26475	0.00539	down	-1.95163	752.18887	0.00376	down	3603.63616	DOWNcore	core
CH	Cell Wall and Capsule	Peptidoglycan Biosynthesis	Glutamine synthetase type I (EC 6.3.1.2)	-1.77795	770.26475	0.00539	down	-1.95163	752.18887	0.00376	down	3603.63616	DOWNcore	core
CH	Nitrogen Metabolism	Ammonia assimilation	Glutamine synthetase type I (EC 6.3.1.2)	-1.77795	770.26475	0.00539	down	-1.95163	752.18887	0.00376	down	3603.63616	DOWNcore	core
Nuc	Vitamins	Cobalamin synthesis	Cobalamin biosynthesis protein BluB	3.8228	62.54604	0.02398	up	2.97502	29.18873	0.07486	-	4.62243	mono	mono
CH	Unclassified	Unclassified	Iron-uptake factor PiuB	5.80005	13.05605	0.00883	up	5.11054	8.90834	0.02015	up	0.56616	UPcore	core
CH	Vitamins	Test - Riboflavin	5-amino-6-(5-phosphoribosylamino)uracil reductase (EC 1.1.1.193)	-2.74193	18.97107	0.00141	down	-0.96689	68.65831	0.18681	-	168.18555	mono	mono
Nuc	Amino Acids	Cysteine Biosynthesis	Cysteine synthase B (EC 2.5.1.47)	-1.73555	78.67549	0.02381	down	-1.41103	83.34707	0.07406	-	267.5003	mono	mono
CH	Membrane Transport	Type IV pilus	Type IV pilus biogenesis protein PilQ	-1.88064	146.88487	0.02365	down	1.41617	1591.3456	0.10833	-	725.08238	mono	mono
CH	Unclassified	Family 23 FUPA23 P-type ATPase	Oligopeptide transport system permease protein OppC (TC 3.A.1.5.1)	-1.58226	22.1186	0.02571	down	-2.87428	9.7806	0.00109	down	88.80427	DOWNcore	core
CH	Membrane Transport	ABC transporter oligopeptide (TC 3.A.1.5.1)	Oligopeptide transport system permease protein OppC (TC 3.A.1.5.1)	-1.58226	22.1186	0.02571	down	-2.87428	9.7806	0.00109	down	88.80427	DOWNcore	core
CH	Photosynthesis	Photosystem I	photosystem I subunit III precursor, plastocyanin (cyt c553) docking protein (PsaF)	NA	0	0.05909	-	NA	0	0.02534	down	1.58799	poly	poly
CH	Amino Acids	Cysteine Biosynthesis	Sulfite reductase [NADPH] flavoprotein alpha-component (EC 1.8.1.2)	-0.53124	32.16216	0.62358	-	2.87592	364.92688	0.02758	up	64.40447	poly	poly
CH	Sulfur Metabolism	Inorganic Sulfur Assimilation	Sulfite reductase [NADPH] flavoprotein alpha-component (EC 1.8.1.2)	-0.53124	32.16216	0.62358	-	2.87592	364.92688	0.02758	up	64.40447	poly	poly
Nuc	Metabolism of Aromatic Compounds	Catechol branch of beta-ketoadipate pathway	3-oxoadipate CoA-transferase subunit B (EC 2.8.3.6)	-3.14637	3.42317	0.0136	down	-2.64782	4.60799	0.03802	down	32.31685	DOWNcore	core
Nuc	Unclassified	Glutaconate CoA-transferase or 3-oxoadipate CoA-transferase Subunits	3-oxoadipate CoA-transferase subunit B (EC 2.8.3.6)	-3.14637	3.42317	0.0136	down	-2.64782	4.60799	0.03802	down	32.31685	DOWNcore	core
CH	Protein Metabolism	Protein Acetylation and Deacetylation in Bacteria	Protein acetyltransferase	-3.66078	4.9769	0.0165	down	-0.2468	58.85528	0.89537	-	83.63581	mono	mono
CH	Carbohydrates	Pyruvate metabolism II: acetyl-CoA, acetogenesis from pyruvate	Protein acetyltransferase	-3.66078	4.9769	0.0165	down	-0.2468	58.85528	0.89537	-	83.63581	mono	mono
CH	Amino Acids	Proline, 4-hydroxyproline uptake and utilization	D-amino acid dehydrogenase (EC 1.4.99.1) family protein in hydroxy-L-proline catabolic cluster	3.61303	211.4203	0.00693	up	1.12187	40.9437	0.31948	-	23.32584	mono	mono
CH	Respiration	Respiratory dehydrogenases 1	D-amino acid dehydrogenase (EC 1.4.99.1) family protein in hydroxy-L-proline catabolic cluster	3.61303	211.4203	0.00693	up	1.12187	40.9437	0.31948	-	23.32584	mono	mono
CH	Carbohydrates	Glycerol and Glycerol-3-phosphate Uptake and Utilization	Glycerol-3-phosphate ABC transporter, periplasmic glycerol-3-phosphate-binding protein (TC 3.A.1.1.3)	4.05414	1966.60882	0.0028	up	-3.93016	8.3299	0.00225	down	156.51543	monoUP-polyDOWN	mixed
CH	Unclassified	Family 23 FUPA23 P-type ATPase	Glycerol-3-phosphate ABC transporter, periplasmic glycerol-3-phosphate-binding protein (TC 3.A.1.1.3)	4.05414	1966.60882	0.0028	up	-3.93016	8.3299	0.00225	down	156.51543	monoUP-polyDOWN	mixed
CH	Membrane Transport	Glycerol and Glycerol-3-phosphate Uptake and Utilization	Glycerol-3-phosphate ABC transporter, periplasmic glycerol-3-phosphate-binding protein (TC 3.A.1.1.3)	4.05414	1966.60882	0.0028	up	-3.93016	8.3299	0.00225	down	156.51543	monoUP-polyDOWN	mixed
CH	Amino Acids	Methionine Biosynthesis	Homoserine O-succinyltransferase (EC 2.3.1.46)	-0.72063	10.73417	0.33619	-	2.80056	132.368	0.00392	up	23.9404	poly	poly
Nuc	DNA Metabolism	CRISPRs	CRISPR-associated protein Cas1	3.88567	62.85812	0.01196	up	3.08086	29.157	0.04034	up	4.33753	UPcore	core
Nuc	Cell Wall and Capsule	LOS core oligosaccharide biosynthesis	UDP-glucose:(heptosyl) LPS alpha1,3-glucosyltransferase WaaG (EC 2.4.1.-)	-2.98867	5.86625	0.03774	down	-2.37529	8.44178	0.10373	-	47.78401	mono	mono
Nuc	Carbohydrates	Mannose Metabolism	Beta-mannosidase (EC 3.2.1.25)	-2.52136	5.18977	0.02323	down	-3.25738	2.67535	0.0075	down	30.44396	DOWNcore	core
CH	Stress Response	SigmaB stress responce regulation	anti-sigma B factor RsbT	NA	0.78055	0.09121	-	NA	0	0.04823	down	7.28064	poly	poly
CH	Unclassified	Unclassified	ChlI component of cobalt chelatase involved in B12 biosynthesis	NA	264.62145	0.00266	up	NA	0	1	-	0	mono	mono
Nuc	Unclassified	Unclassified	Similar to C-terminal Zn-finger domain of DNA topoisomerase I	7.64612	119.87214	0.00938	up	7.55008	93.96224	0.01201	up	1.13232	UPcore	core
CH	Unclassified	Unclassified	Maltoporin (maltose/maltodextrin high-affinity receptor, phage lambda receptor protein)	-2.43879	6.64832	0.1726	-	-4.07879	2.36498	0.04875	down	52.28675	poly	poly
Nuc	Protein Metabolism	tRNA aminoacylation, Glu and Gln	Glutamyl-tRNA(Gln) amidotransferase subunit A (EC 6.3.5.7)	-1.79848	54.73206	0.03443	down	-1.88721	45.39225	0.03359	down	192.30764	DOWNcore	core
Nuc	Predictions based on plant-prokaryote comparative analysis	At3g21300	Glutamyl-tRNA(Gln) amidotransferase subunit A (EC 6.3.5.7)	-1.79848	54.73206	0.03443	down	-1.88721	45.39225	0.03359	down	192.30764	DOWNcore	core
CH	Fatty Acids and Lipids	Polyhydroxybutyrate metabolism	Short chain fatty acids transporter	5.28325	264.02713	8.1e-4	up	-0.93512	3.82166	0.42063	-	8.92709	mono	mono
CH	Membrane Transport	Polyhydroxybutyrate metabolism	Short chain fatty acids transporter	5.28325	264.02713	8.1e-4	up	-0.93512	3.82166	0.42063	-	8.92709	mono	mono
CH	Carbohydrates	Glycolate, glyoxylate interconversions	Glycolate utilization operon transcriptional activator GlcC	-0.35462	5.06322	0.80941	-	-3.46597	2.26756	0.04781	down	8.74079	poly	poly
CH	Carbohydrates	L-rhamnose utilization	L-lactate dehydrogenase (EC 1.1.2.3)	2.45502	841.20539	0.03575	up	-1.74749	49.6202	0.10582	-	206.80223	mono	mono
CH	Respiration	Respiratory dehydrogenases 1	L-lactate dehydrogenase (EC 1.1.2.3)	2.45502	841.20539	0.03575	up	-1.74749	49.6202	0.10582	-	206.80223	mono	mono
CH	Stress Response	Universal stress protein family	Universal stress protein family	2.84915	106.80484	0.02302	up	2.7983	113.13533	0.03111	up	19.94441	UPcore	core
CH	Unclassified	Unclassified	Predicted gluconate TRAP family transporter, DctQ subunit	NA	41.68575	0.00938	up	NA	0	0.32378	-	0.44014	mono	mono
Nuc	Photosynthesis	Photosystem I	photosystem I P700 chlorophyll a apoprotein subunit Ia (PsaA)	NA	0	0.00219	down	NA	0.35538	0.00174	down	12.37062	DOWNcore	core
CH	Stress Response	Hfl operon	HflC protein	1.24065	1526.0829	0.02617	up	-0.06855	676.54141	0.93219	-	873.36887	mono	mono
CH	Protein Metabolism	Proteolysis in bacteria, ATP-dependent	ATP-dependent protease La (EC 3.4.21.53) Type I	1.40922	7447.90025	0.03042	up	-1.11742	1384.32036	0.07337	-	3734.03865	mono	mono
Nuc	Unclassified	Unclassified	Z-ring-associated protein ZapA	8.3175	10.35323	0.01647	up	9.6806	25.66114	0.0108	up	0	UPcore	core
Nuc	Nucleosides and Nucleotides	Purine conversions	Inosine-guanosine kinase (EC 2.7.1.73)	7.8417	11.24167	0.05446	-	9.10792	17.98525	0.03652	up	0	poly	poly
CH	Motility and Chemotaxis	Flagellum	Flagellar M-ring protein FliF	3.17152	1038.92511	0.01026	up	3.94581	1919.2118	0.00446	up	158.35891	UPcore	core
CH	Unclassified	Unclassified	Putative cytoplasmic protein ,probably associated with Glutathione-regulated potassium-efflux	6.99314	3.2308	0.01229	up	10.73226	45.54559	0.00164	up	0	UPcore	core
Nuc	Protein Metabolism	Proteolysis in bacteria, ATP-dependent	Outer membrane stress sensor protease DegQ, serine protease	5.78026	622.66613	9.6e-4	up	5.12903	329.20348	0.00168	up	11.65104	UPcore	core
Nuc	Stress Response	Periplasmic Stress Response	Outer membrane stress sensor protease DegQ, serine protease	5.78026	622.66613	9.6e-4	up	5.12903	329.20348	0.00168	up	11.65104	UPcore	core
CH	Stress Response	Oxidative stress	Rubrerythrin	-4.0949	49.79728	0.00101	down	-4.22705	49.14865	0.00104	down	1161.77736	DOWNcore	core
CH	Carbohydrates	Fermentations in Streptococci	NAD(P) transhydrogenase alpha subunit (EC 1.6.1.2)	-3.20144	133.23842	7e-05	down	-0.28222	1102.85219	0.63029	-	1689.33261	mono	mono
CH	Phosphorus Metabolism	Phosphate metabolism	NAD(P) transhydrogenase alpha subunit (EC 1.6.1.2)	-3.20144	133.23842	7e-05	down	-0.28222	1102.85219	0.63029	-	1689.33261	mono	mono
CH	Vitamins	NAD and NADP cofactor biosynthesis global	NAD(P) transhydrogenase alpha subunit (EC 1.6.1.2)	-3.20144	133.23842	7e-05	down	-0.28222	1102.85219	0.63029	-	1689.33261	mono	mono
Nuc	Vitamins	CoenzymeM Archaea	Phosphosulfolactate synthase (EC 4.4.1.19)	NA	0	0.01187	down	NA	0.207	0.03106	down	4.0855	DOWNcore	core
Nuc	Fatty Acids and Lipids	Glycerolipid and Glycerophospholipid Metabolism in Bacteria	Aldehyde dehydrogenase B (EC 1.2.1.22)	-1.96217	56.3283	0.01123	down	-0.8829	110.53157	0.24908	-	219.69071	mono	mono
Nuc	Carbohydrates	Methylglyoxal Metabolism	Aldehyde dehydrogenase B (EC 1.2.1.22)	-1.96217	56.3283	0.01123	down	-0.8829	110.53157	0.24908	-	219.69071	mono	mono
CH	Respiration	CO Dehydrogenase	Carbon-monoxide dehydrogenase form II, large subunit (EC 1.2.99.2)	-1.42157	118.97859	0.19175	-	-4.2946	17.31225	0.00251	down	407.89883	poly	poly
CH	Unclassified	Unclassified	Muconolactone isomerase (EC 5.3.3.4)	10.01426	25.81546	0.00519	up	3.41357	0.74005	0.32951	-	0	mono	mono
CH	Metabolism of Aromatic Compounds	Benzoate transport and degradation cluster	Benzoyl-CoA oxygenase component B	-3.41569	15.81622	0.00548	down	-2.47762	31.96602	0.03234	down	228.45873	DOWNcore	core
CH	Carbohydrates	Xylose utilization	D-xylose transport ATP-binding protein XylG	4.24677	124.59244	0.00883	up	-1.98464	1.96585	0.17707	-	8.62666	mono	mono
CH	Membrane Transport	Xylose utilization	D-xylose transport ATP-binding protein XylG	4.24677	124.59244	0.00883	up	-1.98464	1.96585	0.17707	-	8.62666	mono	mono
CH	Respiration	Respiratory Complex I	NADH-ubiquinone oxidoreductase chain N (EC 1.6.5.3)	-2.08897	11.3035	0.01246	down	0.23382	62.66366	0.80572	-	65.19439	mono	mono
Nuc	Amino Acids	Cysteine Biosynthesis	Sulfite reductase [NADPH] flavoprotein alpha-component (EC 1.8.1.2)	4.42216	1351.55441	0.00768	up	4.84284	1425.21473	0.006	up	64.40447	UPcore	core
Nuc	Sulfur Metabolism	Inorganic Sulfur Assimilation	Sulfite reductase [NADPH] flavoprotein alpha-component (EC 1.8.1.2)	4.42216	1351.55441	0.00768	up	4.84284	1425.21473	0.006	up	64.40447	UPcore	core
CH	RNA Metabolism	RNA processing and degradation, bacterial	Ribonuclease E inhibitor RraB	5.161	4.82022	0.00991	up	9.52036	109.03464	2.6e-4	up	0.31413	UPcore	core
CH	Amino Acids	Threonine degradation	L-allo-threonine aldolase (EC 2.1.2.1)	-1.97487	11.87706	0.01557	down	0.55306	74.62365	0.51024	-	63.61369	mono	mono
Nuc	Amino Acids	Proline, 4-hydroxyproline uptake and utilization	Predicted regulator PutR for proline utilization, GntR family	3.67238	165.6662	0.00443	up	3.44793	123.57885	0.00672	up	12.77425	UPcore	core
Nuc	Unclassified	Unclassified	Sodium-transporting N-ATPase gamma subunit	9.24701	19.74272	0.04534	up	7.1727	8.3586	0.11616	-	0	mono	mono
Nuc	DNA Metabolism	DNA structural proteins, bacterial	Integration host factor beta subunit	2.64617	2528.48485	0.00466	up	3.15081	3146.4567	0.00172	up	415.48395	UPcore	core
Nuc	Carbohydrates	CO2 uptake, carboxysome	Ribulose bisphosphate carboxylase (EC 4.1.1.39)	NA	0.50251	0.02319	down	NA	0	0.00801	down	8.35911	DOWNcore	core
Nuc	Predictions based on plant-prokaryote comparative analysis	At1g21350	Ribulose bisphosphate carboxylase (EC 4.1.1.39)	NA	0.50251	0.02319	down	NA	0	0.00801	down	8.35911	DOWNcore	core
Nuc	Nucleosides and Nucleotides	AMP to 3-phosphoglycerate	Ribulose bisphosphate carboxylase (EC 4.1.1.39)	NA	0.50251	0.02319	down	NA	0	0.00801	down	8.35911	DOWNcore	core
CH	Phosphorus Metabolism	Phosphate metabolism	Sodium-dependent phosphate transporter	-1.30066	91.83651	0.05657	-	-2.52936	42.24292	0.00206	down	296.59573	poly	poly
CH	Membrane Transport	Phosphate metabolism	Sodium-dependent phosphate transporter	-1.30066	91.83651	0.05657	-	-2.52936	42.24292	0.00206	down	296.59573	poly	poly
CH	RNA Metabolism	Queuosine-Archaeosine Biosynthesis	S-adenosylmethionine:tRNA ribosyltransferase-isomerase (EC 5.-.-.-)	-1.50162	96.7589	0.0168	down	-0.88281	160.09543	0.15451	-	373.25825	mono	mono
CH	Vitamins	Queuosine HMP	S-adenosylmethionine:tRNA ribosyltransferase-isomerase (EC 5.-.-.-)	-1.50162	96.7589	0.0168	down	-0.88281	160.09543	0.15451	-	373.25825	mono	mono
CH	Phosphorus Metabolism	Phosphate metabolism	secreted alkaline phosphatase	NA	0	0.00329	down	NA	0.74005	0.0257	down	7.57196	DOWNcore	core
CH	Vitamins	Riboflavin, FMN and FAD metabolism Extended	Riboflavin kinase (EC 2.7.1.26)	1.33989	263.07478	0.03396	up	-0.27714	94.00384	0.67279	-	141.39518	mono	mono
CH	Amino Acids	Polyamine Metabolism	Carboxynorspermidine decarboxylase (EC 4.1.1.96)	NA	0	0.03126	down	NA	1.24479	0.26167	-	3.58325	mono	mono
CH	Miscellaneous	EC 4. 1. 1.- Carboxy-lyases	Carboxynorspermidine decarboxylase (EC 4.1.1.96)	NA	0	0.03126	down	NA	1.24479	0.26167	-	3.58325	mono	mono
CH	Metabolism of Aromatic Compounds	Chlorobenzoate degradation	Putative benzaldehyde dehydrogenase oxidoreductase protein (EC 1.2.1.28)	9.06048	241.46411	0.00188	up	0.23781	0.93691	0.96401	-	1.13232	mono	mono
CH	Motility and Chemotaxis	Bacterial Chemotaxis	Aerotaxis sensor receptor protein	4.87321	3948.45666	0.004	up	1.69883	480.80677	0.19786	-	179.78013	mono	mono
CH	Unclassified	Unclassified	Pectinesterase (EC 3.1.1.11)	8.65424	9.87402	0.02617	up	4.87066	2.22014	0.18138	-	0	mono	mono
Nuc	Miscellaneous	Metabolite repair	L-asparaginase (EC 3.5.1.1)	-2.11079	32.28687	0.02874	down	-0.7738	77.61826	0.44674	-	141.71382	mono	mono
Nuc	Amino Acids	Glutamine, Glutamate, Aspartate and Asparagine Biosynthesis	L-asparaginase (EC 3.5.1.1)	-2.11079	32.28687	0.02874	down	-0.7738	77.61826	0.44674	-	141.71382	mono	mono
CH	Cell Wall and Capsule	Capsular Polysaccharides Biosynthesis and Assembly	Capsular polysaccharide export system protein KpsS	NA	0.97353	0.21026	-	NA	0	0.04058	down	8.71981	poly	poly
CH	Plastidial (cyanobacterial) electron transport system	Cytochrome b6-f complex in plants (plastidial) and cyanobacteria	Ferredoxin-NADP(+) reductase (EC 1.18.1.2)	NA	0	0.03053	down	NA	0	0.0141	down	2.1852	DOWNcore	core
CH	Photosynthesis	Photosystem I	Ferredoxin-NADP(+) reductase (EC 1.18.1.2)	NA	0	0.03053	down	NA	0	0.0141	down	2.1852	DOWNcore	core
CH	Stress Response	Glutathione: Non-redox reactions	Distant similarity with leukotriene C4 synthase (microsomal glutathione S-transferase)	-2.28746	3.07709	0.17605	-	-3.96502	1.42127	0.04823	down	19.45405	poly	poly
CH	Cell Wall and Capsule	Capsular Polysaccharides Biosynthesis and Assembly	Polysaccharide export lipoprotein Wza	-2.69215	46.70659	0.09274	-	-3.66003	28.13532	0.03994	down	455.46058	poly	poly
CH	Motility and Chemotaxis	Flagellum	Flagellar hook-basal body complex protein FliE	3.82837	1517.83297	0.00401	up	3.42425	1246.55043	0.00901	up	147.85936	UPcore	core
CH	Vitamins	Folate Biosynthesis	Thymidylate synthase (EC 2.1.1.45)	-1.48148	100.25311	0.00591	down	0.2299	353.62178	0.67597	-	375.29558	mono	mono
CH	Nucleosides and Nucleotides	pyrimidine conversions	Thymidylate synthase (EC 2.1.1.45)	-1.48148	100.25311	0.00591	down	0.2299	353.62178	0.67597	-	375.29558	mono	mono
CH	Carbohydrates	Folate-mediated one-carbon metabolism in plants	Thymidylate synthase (EC 2.1.1.45)	-1.48148	100.25311	0.00591	down	0.2299	353.62178	0.67597	-	375.29558	mono	mono
CH	Carbohydrates	Propionate-CoA to Succinate Module	2-methylisocitrate dehydratase (EC 4.2.1.99)	-4.86016	0.35485	0.02893	down	-1.86682	1.98484	0.31351	-	6.50538	mono	mono
Nuc	Amino Acids	Glutamate dehydrogenases	NAD-specific glutamate dehydrogenase (EC 1.4.1.2), large form	2.34941	2201.4293	0.00584	up	2.35282	1962.61215	0.00672	up	441.73087	UPcore	core
CH	Unclassified	Unclassified	Delta 1-pyrroline-5-carboxylate dehydrogenase domain protein	NA	180.9196	0.00693	up	NA	0	0.7069	-	0.28308	mono	mono
CH	Nucleosides and Nucleotides	Pyrimidine utilization	Pyridine nucleotide-disulphide oxidoreductase associated with reductive pyrimidine catabolism	3.8379	203.1266	0.00778	up	-0.19722	13.05166	0.90062	-	18.62215	mono	mono
CH	Fatty Acids and Lipids	Glycerolipid and Glycerophospholipid Metabolism in Bacteria	Phosphatidylserine decarboxylase (EC 4.1.1.65)	-1.25415	66.76039	0.04617	down	-0.8785	93.96307	0.17111	-	215.44997	mono	mono
CH	Cell Division and Cell Cycle	Two cell division clusters relating to chromosome partitioning	Segregation and condensation protein A	-3.74488	9.76602	1.3e-4	down	-1.90664	38.63979	0.01247	down	174.14585	DOWNcore	core
CH	Carbohydrates	Maltose and Maltodextrin Utilization	Transcriptional regulator of maltose utilization, LacI family	4.17043	38.87476	0.00442	up	7.25434	354.19993	2.3e-4	up	2.8929	UPcore	core
Nuc	Amino Acids	Methionine Biosynthesis	Methionine repressor MetJ	5.44583	160.46359	5.6e-4	up	5.25513	120.17863	5.3e-4	up	3.70927	UPcore	core
CH	Potassium metabolism	Glutathione-regulated potassium-efflux system and associated functions	ElaA protein	2.21235	28.41514	0.00647	up	3.93329	102.62757	1.9e-4	up	8.29883	UPcore	core
CH	Regulation and Cell signaling	cAMP signaling in bacteria	ElaA protein	2.21235	28.41514	0.00647	up	3.93329	102.62757	1.9e-4	up	8.29883	UPcore	core
CH	Respiration	Respiration / HGM	Cytochrome c551 NirM	-4.05721	2.3019	0.02351	down	-5.7083	1.30694	0.00948	down	57.16121	DOWNcore	core
CH	Nitrogen Metabolism	Dissimilatory nitrite reductase	Cytochrome c551 NirM	-4.05721	2.3019	0.02351	down	-5.7083	1.30694	0.00948	down	57.16121	DOWNcore	core
CH	Unclassified	Unclassified	MazG protein domain	NA	9.64255	0.02156	up	NA	0	1	-	0	mono	mono
Nuc	Carbohydrates	Mannose Metabolism	Predicted sodium-dependent mannose transporter	NA	1.56905	0.51689	-	NA	0	0.04069	down	3.15863	poly	poly
Nuc	Membrane Transport	Mannose Metabolism	Predicted sodium-dependent mannose transporter	NA	1.56905	0.51689	-	NA	0	0.04069	down	3.15863	poly	poly
CH	Motility and Chemotaxis	Flagellum	Flagellar biosynthesis protein FliL	4.4529	384.61016	3.8e-4	up	4.83817	549.89185	2.4e-4	up	24.12669	UPcore	core
Nuc	DNA Metabolism	DNA-replication	Primosomal replication protein N	3.47579	994.61138	0.01416	up	3.91918	1113.60711	0.0108	up	87.65097	UPcore	core
CH	Vitamins	NAD and NADP cofactor biosynthesis global	Kynurenine 3-monooxygenase (EC 1.14.13.9)	-1.78369	15.44187	0.0302	down	0.53914	84.62649	0.53987	-	71.19571	mono	mono
CH	Unclassified	NAD and NADP - test subsystem	Kynurenine 3-monooxygenase (EC 1.14.13.9)	-1.78369	15.44187	0.0302	down	0.53914	84.62649	0.53987	-	71.19571	mono	mono
CH	Amino Acids	Tryptophan catabolism	Kynurenine 3-monooxygenase (EC 1.14.13.9)	-1.78369	15.44187	0.0302	down	0.53914	84.62649	0.53987	-	71.19571	mono	mono
CH	Vitamins	Lipoic acid metabolism	Proposed lipoate regulatory protein YbeD	1.77705	195.51926	0.0185	up	-0.45423	45.43201	0.53481	-	77.68739	mono	mono
CH	Carbohydrates	Acetoin, butanediol metabolism	Acetoin dehydrogenase E1 component beta-subunit (EC 1.2.4.-)	-2.89687	5.57024	0.01468	down	-4.79636	2.04698	0.00164	down	54.6154	DOWNcore	core
Nuc	Protein Metabolism	Ribosome LSU eukaryotic and archaeal	LSU ribosomal protein L40e	NA	0	0.01196	down	NA	0.14838	0.00805	down	0.73875	DOWNcore	core
CH	Unclassified	AOU COG3236	Ribosylnicotinamide kinase (EC 2.7.1.22)	-2.37591	5.01684	0.01002	down	-0.22833	24.00335	0.82197	-	35.32024	mono	mono
CH	Vitamins	NAD and NADP cofactor biosynthesis global	Ribosylnicotinamide kinase (EC 2.7.1.22)	-2.37591	5.01684	0.01002	down	-0.22833	24.00335	0.82197	-	35.32024	mono	mono
CH	Protein Metabolism	Ribosome SSU eukaryotic and archaeal	SSU ribosomal protein S4e	-2.02119	1.71049	0.19555	-	-3.99993	0.68122	0.04107	down	6.40859	poly	poly
Nuc	Carbohydrates	Glycolysis and Gluconeogenesis in plants	Glycerol-3-phosphate dehydrogenase (EC 1.1.5.3)	-2.59023	6.02156	0.02463	down	-3.40223	2.94434	0.00747	down	35.92751	DOWNcore	core
Nuc	Fatty Acids and Lipids	Glycerolipid and Glycerophospholipid Metabolism in Bacteria	Glycerol-3-phosphate dehydrogenase (EC 1.1.5.3)	-2.59023	6.02156	0.02463	down	-3.40223	2.94434	0.00747	down	35.92751	DOWNcore	core
Nuc	Respiration	Respiratory dehydrogenases 1	Glycerol-3-phosphate dehydrogenase (EC 1.1.5.3)	-2.59023	6.02156	0.02463	down	-3.40223	2.94434	0.00747	down	35.92751	DOWNcore	core
CH	Unclassified	Unclassified	Iron(III) dicitrate transport system, periplasmic iron-binding protein FecB (TC 3.A.1.14.1)	NA	22.11062	0.02955	up	NA	0	0.6252	-	0.28308	mono	mono
Nuc	Respiration	Anaerobic respiratory reductases	Butyryl-CoA dehydrogenase (EC 1.3.99.2)	-2.30468	659.9902	0.00638	down	-2.22654	606.3468	0.00879	down	3364.02464	DOWNcore	core
Nuc	Carbohydrates	Isobutyryl-CoA to Propionyl-CoA Module	Butyryl-CoA dehydrogenase (EC 1.3.99.2)	-2.30468	659.9902	0.00638	down	-2.22654	606.3468	0.00879	down	3364.02464	DOWNcore	core
Nuc	Amino Acids	Lysine fermentation MCB 432	Butyryl-CoA dehydrogenase (EC 1.3.99.2)	-2.30468	659.9902	0.00638	down	-2.22654	606.3468	0.00879	down	3364.02464	DOWNcore	core
Nuc	Fatty Acids and Lipids	Fatty acid degradation regulons	Butyryl-CoA dehydrogenase (EC 1.3.99.2)	-2.30468	659.9902	0.00638	down	-2.22654	606.3468	0.00879	down	3364.02464	DOWNcore	core
Nuc	Vitamins	5-FCL-like protein	Butyryl-CoA dehydrogenase (EC 1.3.99.2)	-2.30468	659.9902	0.00638	down	-2.22654	606.3468	0.00879	down	3364.02464	DOWNcore	core
CH	Membrane Transport	Twin-arginine translocation system	Twin-arginine translocation protein TatB	2.04941	344.65237	0.00396	up	1.23356	209.81213	0.05529	-	109.92575	mono	mono
Nuc	Unclassified	Family 24 FUPA24 P-type ATPase	Superoxide dismutase [Cu-Zn] precursor (EC 1.15.1.1)	-4.14812	4.78671	0.01776	down	-2.23897	16.26643	0.17928	-	88.03065	mono	mono
Nuc	Stress Response	Oxidative stress	Superoxide dismutase [Cu-Zn] precursor (EC 1.15.1.1)	-4.14812	4.78671	0.01776	down	-2.23897	16.26643	0.17928	-	88.03065	mono	mono
CH	Respiration	Respiration / HGM	Cytochrome c oxidase polypeptide II (EC 1.9.3.1)	-2.81552	231.89864	0.0008	down	-0.17758	1564.61485	0.83217	-	2242.94599	mono	mono
CH	Mitochondrial electron transport system in plants	Respiratory complex IV (terminal cytochrome c oxidase) in plants	Cytochrome c oxidase polypeptide II (EC 1.9.3.1)	-2.81552	231.89864	0.0008	down	-0.17758	1564.61485	0.83217	-	2242.94599	mono	mono
Nuc	Amino Acids	Cysteine Biosynthesis	Sulfate permease, Trk-type	3.07794	278.7705	0.00768	up	3.2549	259.41556	0.00672	up	34.09295	UPcore	core
Nuc	Sulfur Metabolism	Inorganic Sulfur Assimilation	Sulfate permease, Trk-type	3.07794	278.7705	0.00768	up	3.2549	259.41556	0.00672	up	34.09295	UPcore	core
Nuc	Membrane Transport	Cysteine Biosynthesis	Sulfate permease, Trk-type	3.07794	278.7705	0.00768	up	3.2549	259.41556	0.00672	up	34.09295	UPcore	core
CH	Cell Wall and Capsule	Peptidoglycan Biosynthesis	Rare lipoprotein A precursor	2.35638	343.52964	0.00156	up	-0.30073	59.58397	0.63254	-	90.68627	mono	mono
CH	RNA Metabolism	tRNA modification Archaea	Protein-L-isoaspartate O-methyltransferase (EC 2.1.1.77)	-1.25681	64.11375	0.0132	down	-0.5957	108.79999	0.23016	-	206.57856	mono	mono
CH	Membrane Transport	Ton and Tol transport systems	Protein-L-isoaspartate O-methyltransferase (EC 2.1.1.77)	-1.25681	64.11375	0.0132	down	-0.5957	108.79999	0.23016	-	206.57856	mono	mono
CH	Stress Response	Bacterial hemoglobins	Hemoglobin-like protein HbO	2.17173	33.31179	0.03507	up	2.70165	51.74768	0.01767	up	10.07675	UPcore	core
Nuc	DNA Metabolism	DNA structural proteins, bacterial	DNA-binding protein Fis	1.92842	574.49564	0.01196	up	1.3729	331.88664	0.06721	-	150.88574	mono	mono
CH	Miscellaneous	Omega-amidase	5'-methylthioadenosine phosphorylase (EC 2.4.2.28)	-2.44211	8.14847	0.00695	down	-0.08874	47.24483	0.95144	-	61.82848	mono	mono
CH	Amino Acids	Methionine Salvage	5'-methylthioadenosine phosphorylase (EC 2.4.2.28)	-2.44211	8.14847	0.00695	down	-0.08874	47.24483	0.95144	-	61.82848	mono	mono
CH	Vitamins	Pterin metabolism 3	Homogentisate 1,2-dioxygenase (EC 1.13.11.5)	1.63845	305.1825	0.07276	-	3.40487	1116.92282	0.00356	up	130.89554	poly	poly
CH	Metabolism of Aromatic Compounds	Homogentisate pathway of aromatic compound degradation	Homogentisate 1,2-dioxygenase (EC 1.13.11.5)	1.63845	305.1825	0.07276	-	3.40487	1116.92282	0.00356	up	130.89554	poly	poly
CH	Amino Acids	Cysteine Biosynthesis, MCB 432	Sulfate permease	3.88667	2833.92015	0.0004	up	-0.10164	190.30944	0.92733	-	254.12884	mono	mono
CH	Membrane Transport	Cysteine Biosynthesis, MCB 432	Sulfate permease	3.88667	2833.92015	0.0004	up	-0.10164	190.30944	0.92733	-	254.12884	mono	mono
CH	Stress Response	Nudix KE	Adenosine (5')-pentaphospho-(5'')-adenosine pyrophosphohydrolase (EC 3.6.1.-)	0.9909	468.48151	0.07522	-	1.91695	969.14277	0.0043	up	321.16143	poly	poly
CH	Amino Acids	Glutamine, Glutamate, Aspartate and Asparagine Biosynthesis	Glutamate synthase [NADPH] large chain (EC 1.4.1.13)	-2.58264	705.58625	3.3e-4	down	-0.89388	2497.14317	0.12304	-	5815.4974	mono	mono
CH	Unclassified	CBSS-1148.35.peg.210	Glutamate synthase [NADPH] large chain (EC 1.4.1.13)	-2.58264	705.58625	3.3e-4	down	-0.89388	2497.14317	0.12304	-	5815.4974	mono	mono
CH	Nitrogen Metabolism	Ammonia assimilation	Glutamate synthase [NADPH] large chain (EC 1.4.1.13)	-2.58264	705.58625	3.3e-4	down	-0.89388	2497.14317	0.12304	-	5815.4974	mono	mono
CH	Metabolite processes	TN RidA: all subgroups, 981 genomes carbamoyl-P	Acetylornithine deacetylase (EC 3.5.1.16)	1.36503	209.64213	0.03999	up	1.40962	234.5785	0.04358	up	111.37029	UPcore	core
CH	Amino Acids	Arginine Biosynthesis extended	Acetylornithine deacetylase (EC 3.5.1.16)	1.36503	209.64213	0.03999	up	1.40962	234.5785	0.04358	up	111.37029	UPcore	core
CH	Unclassified	Unclassified	Glutamate decarboxylase (EC 4.1.1.15)	0.43836	1.24552	0.82044	-	4.36202	21.15607	0.04026	up	1.28939	poly	poly
Nuc	Membrane Transport	Type IV pilus	Type IV pilus biogenesis protein PilE	3.7584	178.72771	0.00221	up	3.70183	152.50989	0.00299	up	13.28014	UPcore	core
Nuc	Virulence	Legionella pneumophila Virulome	Type IV pilus biogenesis protein PilE	3.7584	178.72771	0.00221	up	3.70183	152.50989	0.00299	up	13.28014	UPcore	core
Nuc	Motility and Chemotaxis	Bacterial motility:Gliding	Type IV pilus biogenesis protein PilE	3.7584	178.72771	0.00221	up	3.70183	152.50989	0.00299	up	13.28014	UPcore	core
CH	Stress Response	Regulation of Oxidative Stress Response	Aerobic respiration control protein arcA	3.73606	39.85202	0.08032	-	8.37612	1082.43122	0.00585	up	4.05627	poly	poly
CH	Carbohydrates	D-Galacturonate and D-Glucuronate Utilization	Glucuronide transporter UidB	4.00996	2.2227	0.07495	-	4.82591	4.29922	0.04781	up	0.31413	poly	poly
CH	Membrane Transport	D-Galacturonate and D-Glucuronate Utilization	Glucuronide transporter UidB	4.00996	2.2227	0.07495	-	4.82591	4.29922	0.04781	up	0.31413	poly	poly
Nuc	Unclassified	Unclassified	MSHA pilin protein MshD	10.37661	42.60148	0.00195	up	10.31551	36.31955	0.00218	up	0	UPcore	core
CH	Amino Acids	Branched-Chain Amino Acid Biosynthesis	Leucine dehydrogenase (EC 1.4.1.9)	-1.82842	43.43723	0.01474	down	0.37054	220.19118	0.63782	-	213.49026	mono	mono
CH	Unclassified	Unclassified	Flavoprotein MioC	7.48912	4.35525	0.00598	up	11.08261	57.46754	5.7e-4	up	0	UPcore	core
CH	Sulfur Metabolism	Alkanesulfonate assimilation	Arylsulfatase (EC 3.1.6.1)	1.44401	524.37039	0.0366	up	3.1399	1854.72071	0.0006	up	245.18805	UPcore	core
CH	Secondary Metabolism	Steroid sulfates	Arylsulfatase (EC 3.1.6.1)	1.44401	524.37039	0.0366	up	3.1399	1854.72071	0.0006	up	245.18805	UPcore	core
CH	Virulence	C jejuni colonization of chick caeca	Flagellar motor rotation protein MotB	1.79427	1508.01058	0.01534	up	1.47359	1320.52396	0.04602	up	599.36925	UPcore	core
CH	Motility and Chemotaxis	Flagellum	Flagellar motor rotation protein MotB	1.79427	1508.01058	0.01534	up	1.47359	1320.52396	0.04602	up	599.36925	UPcore	core
Nuc	Unclassified	Unclassified	Capsular polysaccharide synthesis enzyme CpsA, sugar transferase	5.97691	29.40391	0.03173	up	3.73144	9.63774	0.15401	-	0.44014	mono	mono
CH	Unclassified	Unclassified	Soluble cytochrome b562	4.17102	1.06454	0.17747	-	8.35869	8.66263	0.02516	up	0	poly	poly
Nuc	Membrane Transport	General Secretion Pathway	General secretion pathway protein I	6.4811	59.56723	0.03525	up	4.87253	28.45396	0.10057	-	1.25652	mono	mono
Nuc	Photosynthesis	Photosystem II	Photosystem II stability/assembly factor HCF136/Ycf48	NA	0	0.01057	down	NA	0	0.06082	-	0.7698	mono	mono
CH	Vitamins	Pterin metabolism 3	Fumarylacetoacetate hydrolase family protein	1.68897	610.50441	0.01008	up	0.90715	385.10981	0.13783	-	251.27705	mono	mono
CH	Miscellaneous	COG0277	Fumarylacetoacetate hydrolase family protein	1.68897	610.50441	0.01008	up	0.90715	385.10981	0.13783	-	251.27705	mono	mono
CH	Metabolism of Aromatic Compounds	Salicylate and gentisate catabolism	Fumarylacetoacetate hydrolase family protein	1.68897	610.50441	0.01008	up	0.90715	385.10981	0.13783	-	251.27705	mono	mono
Nuc	Nucleosides and Nucleotides	Purine conversions	Nucleotide pyrophosphatase (EC 3.6.1.9)	5.98429	57.34547	0.01861	up	5.44691	31.67802	0.03375	up	0.88029	UPcore	core
CH	Phosphorus Metabolism	P uptake (cyanobacteria)	Phosphate ABC transporter, periplasmic phosphate-binding protein PstS (TC 3.A.1.7.1)	-1.91027	219.49704	0.00565	down	-1.52266	314.33931	0.024	down	1159.49647	DOWNcore	core
CH	Phages and Transposable Elements	Phage cyanophage	Phosphate ABC transporter, periplasmic phosphate-binding protein PstS (TC 3.A.1.7.1)	-1.91027	219.49704	0.00565	down	-1.52266	314.33931	0.024	down	1159.49647	DOWNcore	core
CH	Membrane Transport	P uptake (cyanobacteria)	Phosphate ABC transporter, periplasmic phosphate-binding protein PstS (TC 3.A.1.7.1)	-1.91027	219.49704	0.00565	down	-1.52266	314.33931	0.024	down	1159.49647	DOWNcore	core
CH	Amino Acids	Cysteine Biosynthesis	Adenylylsulfate kinase (EC 2.7.1.25)	-0.70813	136.22286	0.1991	-	-1.56021	83.36618	0.01241	down	305.76452	poly	poly
CH	Cell Wall and Capsule	O-Methyl Phosphoramidate Capsule Modification in Campylobacter	Adenylylsulfate kinase (EC 2.7.1.25)	-0.70813	136.22286	0.1991	-	-1.56021	83.36618	0.01241	down	305.76452	poly	poly
CH	Miscellaneous	Metabolite repair	Adenylylsulfate kinase (EC 2.7.1.25)	-0.70813	136.22286	0.1991	-	-1.56021	83.36618	0.01241	down	305.76452	poly	poly
CH	Sulfur Metabolism	Inorganic Sulfur Assimilation	Adenylylsulfate kinase (EC 2.7.1.25)	-0.70813	136.22286	0.1991	-	-1.56021	83.36618	0.01241	down	305.76452	poly	poly
CH	Virulence	BlaR1 Family Regulatory Sensor-transducer Disambiguation	Copper-translocating P-type ATPase (EC 3.6.3.4)	3.09253	1538.82878	0.00149	up	0.28969	242.65392	0.72687	-	247.21149	mono	mono
CH	Protein Metabolism	Prolyl-tRNA synthetase associated editing enzymes	Copper-translocating P-type ATPase (EC 3.6.3.4)	3.09253	1538.82878	0.00149	up	0.28969	242.65392	0.72687	-	247.21149	mono	mono
Nuc	RNA Metabolism	tRNA processing	Ribonuclease Z (EC 3.1.26.11)	-2.76915	8.53953	0.00786	down	-1.60501	17.42081	0.10472	-	61.45494	mono	mono
CH	Unclassified	Unclassified	Ferric hydroxamate outer membrane receptor FhuA	10.87462	46.91062	0.00393	up	4.30907	0.68122	0.21404	-	0	mono	mono
CH	DNA Metabolism	DNA repair, bacterial MutL-MutS system	DNA mismatch repair protein MutS	-1.29169	116.29151	0.01465	down	-1.15345	138.55733	0.03281	down	375.20885	DOWNcore	core
CH	Transcriptional regulation	CarD	DNA mismatch repair protein MutS	-1.29169	116.29151	0.01465	down	-1.15345	138.55733	0.03281	down	375.20885	DOWNcore	core
CH	Amino Acids	Alanine, serine, glycine metabolism in plants	L-alanine:glyoxylate aminotransferase (EC 2.6.1.44)	-2.44643	12.85212	0.00695	down	-2.43795	14.1576	0.00941	down	94.42113	DOWNcore	core
CH	Carbohydrates	Photorespiration (oxidative C2 cycle)	L-alanine:glyoxylate aminotransferase (EC 2.6.1.44)	-2.44643	12.85212	0.00695	down	-2.43795	14.1576	0.00941	down	94.42113	DOWNcore	core
Nuc	Amino Acids	Arginine and Ornithine Degradation	Succinylornithine transaminase (EC 2.6.1.81)	-3.69838	1.82509	0.04535	down	-0.76973	12.95901	0.70436	-	24.01984	mono	mono
CH	Carbohydrates	Malonate_	Malonate decarboxylase beta subunit	5.51328	19.72634	0.01562	up	-0.74257	0.74005	0.79083	-	1.13232	mono	mono
CH	Nitrogen Metabolism	Ammonia assimilation	Ammonium transporter	0.17461	984.04364	0.76029	-	-1.19908	405.64198	0.03587	down	1180.36032	poly	poly
CH	Membrane Transport	Ammonia assimilation	Ammonium transporter	0.17461	984.04364	0.76029	-	-1.19908	405.64198	0.03587	down	1180.36032	poly	poly
CH	Vitamins	Pyridoxin (Vitamin B6) Biosynthesis	Erythronate-4-phosphate dehydrogenase (EC 1.1.1.290)	1.54804	177.85928	0.02292	up	1.68864	216.26068	0.01954	up	83.24032	UPcore	core
CH	Respiration	Formate hydrogenase	NAD-dependent formate dehydrogenase gamma subunit	-1.23508	5.62285	0.26651	-	-2.54373	2.4412	0.04358	down	18.24775	poly	poly
CH	Amino Acids	Glutamine, Glutamate, Aspartate and Asparagine Biosynthesis	Glutamine amidotransferase protein GlxB (EC 2.4.2.-)	-2.3309	5.56448	0.01046	down	-2.99125	3.83525	0.00404	down	36.9731	DOWNcore	core
CH	Nitrogen Metabolism	Ammonia assimilation	Glutamine amidotransferase protein GlxB (EC 2.4.2.-)	-2.3309	5.56448	0.01046	down	-2.99125	3.83525	0.00404	down	36.9731	DOWNcore	core
CH	Respiration	CO Dehydrogenase	Carbon monoxide dehydrogenase small chain (EC 1.2.99.2)	-1.74166	27.15361	0.04709	down	-2.77528	14.28788	0.0067	down	118.79352	DOWNcore	core
Nuc	Stress Response	Oxygen stress response / Human gut microbiome	Alkyl hydroperoxide reductase protein C (EC 1.6.4.-)	-1.86531	79.85148	0.02507	down	-1.24467	108.16927	0.14328	-	292.45333	mono	mono
Nuc	Miscellaneous	Metabolite repair	Alkyl hydroperoxide reductase protein C (EC 1.6.4.-)	-1.86531	79.85148	0.02507	down	-1.24467	108.16927	0.14328	-	292.45333	mono	mono
Nuc	Sulfur Metabolism	Thioredoxin-disulfide reductase	Alkyl hydroperoxide reductase protein C (EC 1.6.4.-)	-1.86531	79.85148	0.02507	down	-1.24467	108.16927	0.14328	-	292.45333	mono	mono
Nuc	Predictions based on plant-prokaryote comparative analysis	At1g21350	Alkyl hydroperoxide reductase protein C (EC 1.6.4.-)	-1.86531	79.85148	0.02507	down	-1.24467	108.16927	0.14328	-	292.45333	mono	mono
CH	Phosphorus Metabolism	Phosphonate metabolism	Phosphonopyruvate decarboxylase (EC 4.1.1.82)	-3.13821	2.21089	0.06019	-	-5.50252	0.68122	0.01325	down	25.68181	poly	poly
Nuc	Stress Response	At5g63290	Heat-inducible transcription repressor HrcA	-0.8926	24.38697	0.40439	-	-2.58151	6.83606	0.02378	down	47.61506	poly	poly
Nuc	Unclassified	Heme LB	Heat-inducible transcription repressor HrcA	-0.8926	24.38697	0.40439	-	-2.58151	6.83606	0.02378	down	47.61506	poly	poly
Nuc	Carbohydrates	Sugar utilization in Thermotogales	Maltose/maltodextrin ABC transporter, permease protein MalF	-2.81939	2.82976	0.04125	down	-1.84376	5.17253	0.18241	-	19.8458	mono	mono
Nuc	Membrane Transport	Sugar utilization in Thermotogales	Maltose/maltodextrin ABC transporter, permease protein MalF	-2.81939	2.82976	0.04125	down	-1.84376	5.17253	0.18241	-	19.8458	mono	mono
CH	Protein Metabolism	Selenocysteine metabolism	Selenophosphate-dependent tRNA 2-selenouridine synthase	-2.78263	6.38065	0.00565	down	-0.40636	37.05187	0.67839	-	59.68803	mono	mono
CH	Unclassified	Unclassified	ABC-type Fe3+-siderophore transport system, permease 2 component	NA	40.38784	0.01035	up	NA	0	1	-	0	mono	mono
CH	DNA Metabolism	DNA repair, bacterial RecBCD pathway	Exodeoxyribonuclease V gamma chain (EC 3.1.11.5)	3.23134	182.56559	0.01057	up	1.45232	58.85428	0.19596	-	26.68629	mono	mono
CH	Membrane Transport	Ton and Tol transport systems	Predicted b-glucoside-specific TonB-dependent outer membrane receptor	-2.89554	20.75672	6.3e-4	down	0.75856	284.38704	0.28739	-	198.40861	mono	mono
CH	Respiration	Anaerobic respiratory reductases	Flavodoxin reductases (ferredoxin-NADPH reductases) family 1	-0.80978000000000006	437.19159	0.15865	-	-2.59586	136.90768	4.7e-4	down	1010.55518	poly	poly
CH	Vitamins	YgfZ	Flavodoxin reductases (ferredoxin-NADPH reductases) family 1	-0.80978000000000006	437.19159	0.15865	-	-2.59586	136.90768	4.7e-4	down	1010.55518	poly	poly
CH	Regulation and Cell signaling	cAMP signaling in bacteria	Adenylate cyclase (EC 4.6.1.1)	2.58707	3089.01914	8.1e-4	up	-0.46012	403.58166	0.44257	-	679.19235	mono	mono
CH	Unclassified	PROSC YggS	Adenylate cyclase (EC 4.6.1.1)	2.58707	3089.01914	8.1e-4	up	-0.46012	403.58166	0.44257	-	679.19235	mono	mono
CH	Miscellaneous	IojapClusters	Adenylate cyclase (EC 4.6.1.1)	2.58707	3089.01914	8.1e-4	up	-0.46012	403.58166	0.44257	-	679.19235	mono	mono
CH	Carbohydrates	Glycolate, glyoxylate interconversions	Glycolate dehydrogenase (EC 1.1.99.14), FAD-binding subunit GlcE	-2.67509	3.92052	0.06935	-	-3.33848	2.83714	0.04538	down	34.40248	poly	poly
CH	Cell Division and Cell Cycle	Macromolecular synthesis operon	SSU ribosomal protein S21p	-2.8195	321.19617	0.00432	down	-2.02093	611.43372	0.03055	down	3029.94821	DOWNcore	core
CH	Protein Metabolism	Ribosome SSU bacterial	SSU ribosomal protein S21p	-2.8195	321.19617	0.00432	down	-2.02093	611.43372	0.03055	down	3029.94821	DOWNcore	core
CH	Stress Response	Housecleaning nucleoside triphosphate pyrophosphatases	Nucleoside 5-triphosphatase RdgB (dHAPTP, dITP, XTP-specific) (EC 3.6.1.15)	-2.04974	27.29147	0.00881	down	-1.05576	58.53775	0.1543	-	153.55115	mono	mono
CH	Carbohydrates	alpha carboxysome	Nucleoside 5-triphosphatase RdgB (dHAPTP, dITP, XTP-specific) (EC 3.6.1.15)	-2.04974	27.29147	0.00881	down	-1.05576	58.53775	0.1543	-	153.55115	mono	mono
CH	Unclassified	Heme and Siroheme Biosynthesis	Nucleoside 5-triphosphatase RdgB (dHAPTP, dITP, XTP-specific) (EC 3.6.1.15)	-2.04974	27.29147	0.00881	down	-1.05576	58.53775	0.1543	-	153.55115	mono	mono
CH	Miscellaneous	Metabolite repair	Nucleoside 5-triphosphatase RdgB (dHAPTP, dITP, XTP-specific) (EC 3.6.1.15)	-2.04974	27.29147	0.00881	down	-1.05576	58.53775	0.1543	-	153.55115	mono	mono
CH	Sulfur Metabolism	L-Cystine Uptake and Metabolism	L-cystine uptake protein TcyP	3.18378	112.14152	0.04355	up	-4.55495	0.93691	0.0178	down	16.45248	monoUP-polyDOWN	mixed
CH	Vitamins	Thiamin biosynthesis LDP	L-cystine uptake protein TcyP	3.18378	112.14152	0.04355	up	-4.55495	0.93691	0.0178	down	16.45248	monoUP-polyDOWN	mixed
CH	Respiration	Soluble cytochromes and functionally related electron carriers	Cytochrome C550 (Soluble cytochrome C)	-6.3889	1.48574	0.00171	down	0.15305	155.85755	0.95254	-	166.3621	mono	mono
CH	Membrane Transport	Sodium Hydrogen Antiporter	Na(+) H(+) antiporter subunit E	3.49209	71.99382	0.03072	up	0.90397	13.15475	0.55875	-	8.67688	mono	mono
CH	DNA Metabolism	Restriction-Modification System	Putative DNA-binding protein in cluster with Type I restriction-modification system	2.73644	116.70656	0.02351	up	-0.93849	9.80844	0.39949	-	22.65925	mono	mono
Nuc	Carbohydrates	acinetobacter tca	Aconitate hydratase (EC 4.2.1.3)	-1.74424	241.61326	0.04351	down	-0.55216	525.0195	0.5634	-	816.19064	mono	mono
Nuc	Unclassified	Family 23 FUPA23 P-type ATPase	Aconitate hydratase (EC 4.2.1.3)	-1.74424	241.61326	0.04351	down	-0.55216	525.0195	0.5634	-	816.19064	mono	mono
Nuc	Miscellaneous	YgfZ-Fe-S	Aconitate hydratase (EC 4.2.1.3)	-1.74424	241.61326	0.04351	down	-0.55216	525.0195	0.5634	-	816.19064	mono	mono
Nuc	Vitamins	YgfZ	Aconitate hydratase (EC 4.2.1.3)	-1.74424	241.61326	0.04351	down	-0.55216	525.0195	0.5634	-	816.19064	mono	mono
Nuc	Amino Acids	Glutamine, glutamate, aspartate, asparagine metabolism in plants	Aconitate hydratase (EC 4.2.1.3)	-1.74424	241.61326	0.04351	down	-0.55216	525.0195	0.5634	-	816.19064	mono	mono
CH	Vitamins	Cobalamin Biosynthesis	Cobalt-precorrin-2 C20-methyltransferase (EC 2.1.1.130)	5.16973	38.4312	0.01474	up	-2.0174	0.74005	0.38762	-	1.43093	mono	mono
Nuc	Photosynthesis	Phycobilisome	Phycocyanin beta chain	NA	0	0.26563	-	NA	0	0.04603	down	2.8308	poly	poly
CH	RNA Metabolism	ATP-dependent RNA helicases, bacterial	ATP-dependent RNA helicase RhlE	-0.90239	177.0132	0.04773	down	-0.18551	314.81196	0.71585	-	445.75523	mono	mono
CH	Unclassified	Unclassified	Peptide transport system ATP-binding protein SapF	6.00555	1.47028	0.07059	-	10.69635	43.98986	0.00656	up	0	poly	poly
CH	Protein Metabolism	Ribosome SSU eukaryotic and archaeal	SSU ribosomal protein S15e (S19p)	NA	0	0.00967	down	NA	0.62239	0.06211	-	0.2986	mono	mono
CH	Carbohydrates	Methylcitrate cycle	2-methylcitrate dehydratase (EC 4.2.1.79)	2.68882	456.91456	0.00998	up	-4.27537	2.8596	5.4e-4	down	89.32664	monoUP-polyDOWN	mixed
CH	Membrane Transport	ABC transporter oligopeptide (TC 3.A.1.5.1)	Oligopeptide transport ATP-binding protein OppF (TC 3.A.1.5.1)	1.02069	79.60649	0.11874	-	-2.49071	7.65691	0.00181	down	51.8741	poly	poly
CH	Carbohydrates	alpha carboxysome	probable RuBisCo-expression protein CbbX	NA	0.72064	0.03448	down	NA	0	0.00314	down	0.75427	DOWNcore	core
Nuc	Carbohydrates	Entner-Doudoroff Pathway	Phosphogluconate dehydratase (EC 4.2.1.12)	1.30877	455.7065	0.04534	up	1.69752	511.37004	0.01709	up	184.3193	UPcore	core
CH	Stress Response	Nudix KE	Thiamin-phosphate pyrophosphorylase-like protein	-3.75666	1.19828	0.01294	down	-3.47703	3.14565	0.02758	down	26.62784	DOWNcore	core
CH	Membrane Transport	ABC transporter dipeptide (TC 3.A.1.5.2)	Dipeptide transport ATP-binding protein DppD (TC 3.A.1.5.2)	3.07265	176.57739	0.00808	up	-1.07455	10.56526	0.27434	-	27.73917	mono	mono
CH	Unclassified	Family 23 FUPA23 P-type ATPase	Dipeptide transport ATP-binding protein DppD (TC 3.A.1.5.2)	3.07265	176.57739	0.00808	up	-1.07455	10.56526	0.27434	-	27.73917	mono	mono
Nuc	Protein Metabolism	Peptidyl-prolyl cis-trans isomerase	FKBP-type peptidyl-prolyl cis-trans isomerase FkpA precursor (EC 5.2.1.8)	3.36534	800.2849	2.3e-4	up	4.14576	1131.57185	6e-05	up	76.24458	UPcore	core
Nuc	Potassium metabolism	Potassium homeostasis	FKBP-type peptidyl-prolyl cis-trans isomerase FkpA precursor (EC 5.2.1.8)	3.36534	800.2849	2.3e-4	up	4.14576	1131.57185	6e-05	up	76.24458	UPcore	core
CH	Carbohydrates	D-galactonate catabolism	D-Galactonate repressor DgoR	7.20828	667.09489	0.01543	up	4.93481	150.89781	0.06445	-	6.23783	mono	mono
CH	Membrane Transport	Transport of Manganese	Manganese uptake regulation protein MUR	NA	1.36745	0.36307	-	NA	0	0.00852	down	4.29278	poly	poly
CH	Cell Wall and Capsule	Lipid A-Ara4N pathway ( Polymyxin resistance )	Polymyxin resistance protein ArnC, glycosyl transferase (EC 2.4.-.-)	4.059	83.62713	0.00695	up	1.55494	15.8094	0.21873	-	6.58482	mono	mono
CH	Carbohydrates	Trehalose Biosynthesis	Trehalose synthase (EC 5.4.99.16)	-2.50322	11.12096	0.07213	-	-3.3921	6.97572	0.02985	down	93.29322	poly	poly
Nuc	Carbohydrates	Acetoin, butanediol metabolism	Transcriptional activator of acetoin dehydrogenase operon AcoR	5.91267	393.81301	0.00294	up	5.37926	225.87895	0.00566	up	6.60035	UPcore	core
CH	Protein Metabolism	Ribosome SSU eukaryotic and archaeal	SSU ribosomal protein S11e (S17p)	NA	1.11769	0.14368	-	NA	0	0.02204	down	2.04366	poly	poly
Nuc	Amino Acids	Arginine and Ornithine Degradation	Delta-1-pyrroline-5-carboxylate dehydrogenase (EC 1.5.1.12)	1.83491	932.97268999999994	0.01016	up	1.69886	716.79926	0.0186	up	266.59616	UPcore	core
Nuc	Unclassified	PROSC YggS	Delta-1-pyrroline-5-carboxylate dehydrogenase (EC 1.5.1.12)	1.83491	932.97268999999994	0.01016	up	1.69886	716.79926	0.0186	up	266.59616	UPcore	core
CH	Vitamins	Test - Thiamin	Glycine oxidase ThiO (EC 1.4.3.19)	-2.89184	9.47598	0.00811	down	-2.19564	16.97199	0.0386	down	97.39798	DOWNcore	core
CH	Unclassified	Unclassified	Pyruvate formate-lyase activating enzyme (EC 1.97.1.4)	5.31887	1.27739	0.20191	-	11.12081	59.29415	0.02085	up	0	poly	poly
CH	Vitamins	YgfZ	Coenzyme PQQ synthesis protein E	-3.01496	26.81121	0.00202	down	0.32001	320.39742	0.73449	-	300.14143	mono	mono
Nuc	DNA Metabolism	DNA repair, bacterial	Exonuclease SbcC	3.07027	115.49996	0.00539	up	2.83474	84.33159	0.00892	up	13.91022	UPcore	core
CH	Amino Acids	Glycine cleavage system	Glycine dehydrogenase [decarboxylating] (glycine cleavage system P2 protein) (EC 1.4.4.2)	NA	0.54999	0.00778	down	NA	0	0.00269	down	16.32186	DOWNcore	core
CH	Vitamins	BEY LIP	Glycine dehydrogenase [decarboxylating] (glycine cleavage system P2 protein) (EC 1.4.4.2)	NA	0.54999	0.00778	down	NA	0	0.00269	down	16.32186	DOWNcore	core
CH	Carbohydrates	Photorespiration (oxidative C2 cycle)	Glycine dehydrogenase [decarboxylating] (glycine cleavage system P2 protein) (EC 1.4.4.2)	NA	0.54999	0.00778	down	NA	0	0.00269	down	16.32186	DOWNcore	core
CH	Respiration	Anaerobic respiratory reductases	Butyryl-CoA dehydrogenase (EC 1.3.99.2)	-3.01823	293.35732	3.8e-4	down	0.30953	3285.71593	0.67861	-	3364.02464	mono	mono
CH	Carbohydrates	Isobutyryl-CoA to Propionyl-CoA Module	Butyryl-CoA dehydrogenase (EC 1.3.99.2)	-3.01823	293.35732	3.8e-4	down	0.30953	3285.71593	0.67861	-	3364.02464	mono	mono
CH	Amino Acids	Lysine fermentation MCB 432	Butyryl-CoA dehydrogenase (EC 1.3.99.2)	-3.01823	293.35732	3.8e-4	down	0.30953	3285.71593	0.67861	-	3364.02464	mono	mono
CH	Fatty Acids and Lipids	Fatty acid degradation regulons	Butyryl-CoA dehydrogenase (EC 1.3.99.2)	-3.01823	293.35732	3.8e-4	down	0.30953	3285.71593	0.67861	-	3364.02464	mono	mono
CH	Vitamins	5-FCL-like protein	Butyryl-CoA dehydrogenase (EC 1.3.99.2)	-3.01823	293.35732	3.8e-4	down	0.30953	3285.71593	0.67861	-	3364.02464	mono	mono
CH	Unclassified	Unclassified	rhamnogalacturonan acetylesterase	7.95683	5.98826	0.02611	up	4.29374	0.68122	0.19659	-	0	mono	mono
CH	Protein Metabolism	Ribosomal proteins, zinc requirement	LSU ribosomal protein L33p	-2.93145	48.80238	0.00598	down	-1.35094	158.85468	0.16412	-	511.90398	mono	mono
CH	Stress Response	Heat shock dnaK gene cluster extended	Signal peptidase-like protein	-1.89108	48.63547	0.01035	down	-0.63421	127.1525	0.37539	-	243.98452	mono	mono
CH	Membrane Transport	Mannose-sensitive hemagglutinin type 4 pilus	MSHA biogenesis protein MshE	1.14359	11.68178	0.33234	-	6.23947	421.89135	6.9e-4	up	7.07336	poly	poly
CH	Motility and Chemotaxis	Bacterial Chemotaxis	Chemotaxis protein methyltransferase CheR (EC 2.1.1.80)	4.0736	4458.58754	7.2e-4	up	2.31147	1435.11289	0.01909	up	352.70302	UPcore	core
Nuc	Carbohydrates	TCA cycle in plants	Dihydrolipoamide dehydrogenase of 2-oxoglutarate dehydrogenase (EC 1.8.1.4)	-2.55645	233.22819	7.9e-4	down	-1.32461	498.65456	0.04104	down	1387.5563	DOWNcore	core
Nuc	Vitamins	Thiamine-biosynthesis	Dihydrolipoamide dehydrogenase of 2-oxoglutarate dehydrogenase (EC 1.8.1.4)	-2.55645	233.22819	7.9e-4	down	-1.32461	498.65456	0.04104	down	1387.5563	DOWNcore	core
CH	Stress Response	Glutathione: Redox cycle	Glutathione peroxidase (EC 1.11.1.9)	-1.58697	38.29836	0.0255	down	0.4065	170.8439	0.59547	-	151.04454	mono	mono
CH	Carbohydrates	D-Galacturonate and D-Glucuronate Utilization	2-deoxy-D-gluconate 3-dehydrogenase (EC 1.1.1.125)	4.88014	224.772	0.01016	up	3.78888	109.99496	0.03467	up	10.05759	UPcore	core
CH	Unclassified	Unclassified	Antitoxin YafN	NA	0	1	-	NA	24.99668	0.03219	up	0	poly	poly
CH	Stress Response	Oxygen stress response / Human gut microbiome	Thioredoxin reductase (EC 1.8.1.9)	-1.28859	412.82771	0.01303	down	0.24574	1301.72178	0.6546	-	1385.08429	mono	mono
CH	Nucleosides and Nucleotides	pyrimidine conversions	Thioredoxin reductase (EC 1.8.1.9)	-1.28859	412.82771	0.01303	down	0.24574	1301.72178	0.6546	-	1385.08429	mono	mono
CH	Protein Metabolism	Glycine reductase, sarcosine reductase and betaine reductase	Thioredoxin reductase (EC 1.8.1.9)	-1.28859	412.82771	0.01303	down	0.24574	1301.72178	0.6546	-	1385.08429	mono	mono
CH	RNA Metabolism	Wyeosine-MimG Biosynthesis	Thioredoxin reductase (EC 1.8.1.9)	-1.28859	412.82771	0.01303	down	0.24574	1301.72178	0.6546	-	1385.08429	mono	mono
CH	Sulfur Metabolism	Thioredoxin-disulfide reductase	Thioredoxin reductase (EC 1.8.1.9)	-1.28859	412.82771	0.01303	down	0.24574	1301.72178	0.6546	-	1385.08429	mono	mono
CH	Carbohydrates	Citrate Metabolism KE3	NADP-dependent malic enzyme (EC 1.1.1.40)	-1.74385	644.67136	6.8e-4	down	-2.67052	369.17015	3e-05	down	2898.1534	DOWNcore	core
CH	Nucleosides and Nucleotides	Purine Utilization	Xanthine dehydrogenase, iron-sulfur cluster and FAD-binding subunit A (1.17.1.4)	4.7208	161.1171	5.2e-4	up	-0.21846	5.69327	0.8554	-	8.30065	mono	mono
CH	Metabolism of Aromatic Compounds	Phenylacetyl-CoA catabolic pathway (core)	Phenylacetate-CoA oxygenase, PaaI subunit	12.87528	3515.74853	1.9e-4	up	2.31644	3.52376	0.3112	-	0.59721	mono	mono
CH	Membrane Transport	Type IV pilus	Type IV pilus biogenesis protein PilM	-1.59166	108.6529	0.04107	down	1.75565	1197.61393	0.04565	up	434.3355	monoDOWN-polyUP	mixed
CH	Unclassified	Unclassified	Putative Ton-B dependent hemine receptor	9.58447	18.44836	0.03483	up	5.25177	1.42127	0.23465	-	0	mono	mono
CH	Nitrogen Metabolism	Denitrification	Nitrous oxide reductase maturation protein NosF (ATPase)	-0.23275	1.35929	0.91236	-	4.10185	27.58466	0.04207	up	2.04366	poly	poly
CH	Respiration	Respiration / HGM	Nitrous oxide reductase maturation protein NosF (ATPase)	-0.23275	1.35929	0.91236	-	4.10185	27.58466	0.04207	up	2.04366	poly	poly
CH	RNA Metabolism	Transcription factors bacterial	Transcription antitermination protein NusG	-2.2701	610.62664	0.01215	down	-1.85417	917.36702	0.04058	down	4108.71393	DOWNcore	core
CH	Unclassified	Unclassified	NADH dehydrogenase, subunit 5	8.57018	9.4612	0.02351	up	5.26346	2.96019	0.1438	-	0	mono	mono
CH	Motility and Chemotaxis	Flagellum	Flagellum-specific ATP synthase FliI	0.62999	186.57106	0.32092	-	1.59854	388.37285	0.0259	up	161.45276	poly	poly
CH	Unclassified	Unclassified	Response regulator BaeR	7.65163	93.77493	0.00556	up	6.14875	36.01641	0.01708	up	0.59721	UPcore	core
Nuc	DNA Metabolism	CRISPRs	CRISPR-associated protein, Csd1 family	11.46616	128.69389	0.03328	up	2.50102	0.414	0.66869	-	0	mono	mono
Nuc	Carbohydrates	Photorespiration (oxidative C2 cycle)	Glyoxylate carboligase (EC 4.1.1.47)	-3.60468	1.07187	0.04324	down	-3.84805	0.55538	0.04066	down	9.30513	DOWNcore	core
Nuc	Nitrogen Metabolism	Allantoin Utilization	Glyoxylate carboligase (EC 4.1.1.47)	-3.60468	1.07187	0.04324	down	-3.84805	0.55538	0.04066	down	9.30513	DOWNcore	core
CH	Carbohydrates	Photorespiration (oxidative C2 cycle)	Glyoxylate carboligase (EC 4.1.1.47)	-1.33654	2.7231	0.34839	-	-3.83436	1.24479	0.04072	down	9.30513	poly	poly
CH	Nitrogen Metabolism	Allantoin Utilization	Glyoxylate carboligase (EC 4.1.1.47)	-1.33654	2.7231	0.34839	-	-3.83436	1.24479	0.04072	down	9.30513	poly	poly
Nuc	Carbohydrates	Citrate Metabolism KE3	NADP-dependent malic enzyme (EC 1.1.1.40)	-1.00148	1424.53868	0.04324	down	-0.96537	1257.84729	0.06172	-	2898.1534	mono	mono
CH	Protein Metabolism	Putative TldE-TldD proteolytic complex	TldD family protein, Actinobacterial subgroup	4.07654	32.8237	0.03877	up	8.30854	662.81447	0.00258	up	2.60982	UPcore	core
Nuc	Stress Response	Regulation of Oxidative Stress Response	Aerobic respiration control protein arcA	7.10153	548.09356	0.01824	up	6.69153	543.26903	0.02829	up	4.05627	UPcore	core
CH	Stress Response	Glutaredoxins	Probable monothiol glutaredoxin GrlA	4.292	147.58795	0.00251	up	4.9772	257.7113	0.00144	up	10.00919	UPcore	core
CH	Regulation and Cell signaling	Murein hydrolase regulation and cell death	Cytidine deaminase (EC 3.5.4.5)	2.36799	52.34828	0.00817	up	2.43711	60.72757	0.00923	up	13.81707	UPcore	core
CH	Nucleosides and Nucleotides	pyrimidine conversions	Cytidine deaminase (EC 3.5.4.5)	2.36799	52.34828	0.00817	up	2.43711	60.72757	0.00923	up	13.81707	UPcore	core
CH	Respiration	Terminal cytochrome C oxidases	Alternative cytochrome c oxidase polypeptide CoxM (EC 1.9.3.1)	-3.3901	34.03984	1.9e-4	down	-3.66622	30.52646	1.1e-4	down	473.75121	DOWNcore	core
CH	Carbohydrates	Glycolysis test	Glucose-6-phosphate isomerase, archaeal II (EC 5.3.1.9)	NA	0.35485	0.02875	down	NA	0	0.02192	down	4.52746	DOWNcore	core
CH	Protein Metabolism	Ribosome LSU bacterial	LSU ribosomal protein L3p (L3e)	-2.17865	2031.90769	0.0183	down	-2.72457	1521.38233	0.00761	down	12308.93587	DOWNcore	core
CH	Photosynthesis	Photosystem I	photosystem I subunit II (PsaD)	NA	0	0.07415	-	NA	0	0.04649	down	5.09544	poly	poly
CH	Carbohydrates	Calvin-Benson-Bassham cycle in plants	Phosphoribulokinase (EC 2.7.1.19)	-4.27736	0.53775	0.00491	down	0.0691	7.427	0.9857	-	4.3704	mono	mono
CH	Potassium metabolism	Glutathione-regulated potassium-efflux system and associated functions	Phosphoribulokinase (EC 2.7.1.19)	-4.27736	0.53775	0.00491	down	0.0691	7.427	0.9857	-	4.3704	mono	mono
CH	Central metabolism	EC 6.4.1.- Ligases that form carbon-carbon bonds	Methylcrotonyl-CoA carboxylase biotin-containing subunit (EC 6.4.1.4)	-0.41551	76.64513	0.49903	-	1.34408	282.00209	0.04911	up	137.29138	poly	poly
CH	Amino Acids	HMG CoA Synthesis	Methylcrotonyl-CoA carboxylase biotin-containing subunit (EC 6.4.1.4)	-0.41551	76.64513	0.49903	-	1.34408	282.00209	0.04911	up	137.29138	poly	poly
CH	Carbohydrates	Serine-glyoxylate cycle	Methylcrotonyl-CoA carboxylase biotin-containing subunit (EC 6.4.1.4)	-0.41551	76.64513	0.49903	-	1.34408	282.00209	0.04911	up	137.29138	poly	poly
CH	Vitamins	Biotin synthesis & utilization	Methylcrotonyl-CoA carboxylase biotin-containing subunit (EC 6.4.1.4)	-0.41551	76.64513	0.49903	-	1.34408	282.00209	0.04911	up	137.29138	poly	poly
CH	Carbohydrates	Xylose utilization	Xylose ABC transporter, permease protein XylH	2.00817	34.43982	0.12255	-	-3.39756	1.44498	0.03212	down	11.07577	poly	poly
CH	Membrane Transport	Xylose utilization	Xylose ABC transporter, permease protein XylH	2.00817	34.43982	0.12255	-	-3.39756	1.44498	0.03212	down	11.07577	poly	poly
CH	Motility and Chemotaxis	Flagellum	Flagellar biosynthesis protein FliP	1.8122	168.85071	0.01137	up	0.56188	77.60547	0.40288	-	64.87298	mono	mono
CH	Unclassified	Unclassified	MSHA pilin protein MshD	6.29236	3.00239	0.01388	up	10.19122	30.9281	8.8e-4	up	0	UPcore	core
CH	Carbohydrates	Fructose utilization	Fructose ABC transporter, substrate-binding component FrcB	7.4003	2750.9385	4.7e-4	up	-0.76024	10.54686	0.58295	-	22.11772	mono	mono
CH	Membrane Transport	Fructose utilization	Fructose ABC transporter, substrate-binding component FrcB	7.4003	2750.9385	4.7e-4	up	-0.76024	10.54686	0.58295	-	22.11772	mono	mono
CH	Carbohydrates	Entner-Doudoroff Pathway	Glucose dehydrogenase, PQQ-dependent (EC 1.1.5.2)	0.43931	462.1468	0.55393	-	-3.30883	37.33807	4.9e-4	down	450.64088	poly	poly
CH	Respiration	Respiratory dehydrogenases 1	Glucose dehydrogenase, PQQ-dependent (EC 1.1.5.2)	0.43931	462.1468	0.55393	-	-3.30883	37.33807	4.9e-4	down	450.64088	poly	poly
CH	Vitamins	Coenzyme PQQ synthesis	Glucose dehydrogenase, PQQ-dependent (EC 1.1.5.2)	0.43931	462.1468	0.55393	-	-3.30883	37.33807	4.9e-4	down	450.64088	poly	poly
CH	Respiration	Respiratory dehydrogenases 1	D-Lactate dehydrogenase (EC 1.1.2.5)	8.72673	143.0908	0.00357	up	0.5125	1.24479	0.88661	-	0.84924	mono	mono
CH	Carbohydrates	Lactate utilization	D-Lactate dehydrogenase (EC 1.1.2.5)	8.72673	143.0908	0.00357	up	0.5125	1.24479	0.88661	-	0.84924	mono	mono
CH	Metabolism of Aromatic Compounds	N-heterocyclic aromatic compound degradation	Isoquinoline 1-oxidoreductase beta subunit (EC 1.3.99.16)	-2.8263	44.10568	0.00201	down	0.83533	599.05155	0.31375	-	426.00075	mono	mono
CH	Vitamins	Coenzyme PQQ synthesis	Isoquinoline 1-oxidoreductase beta subunit (EC 1.3.99.16)	-2.8263	44.10568	0.00201	down	0.83533	599.05155	0.31375	-	426.00075	mono	mono
CH	RNA Metabolism	RNA polymerase archaeal	DNA-directed RNA polymerase subunit A' (EC 2.7.7.6)	-1.85341	1.69052	0.21823	-	-4.58351	0.74005	0.02621	down	8.0605	poly	poly
CH	Carbohydrates	TCA Cycle	Citrate lyase beta chain (EC 4.1.3.6)	-3.54728	7.84084	0.03204	down	-1.6821	32.16691	0.29114	-	128.19622	mono	mono
CH	Miscellaneous	EC 4.1.3.- Oxo-acid-lyases	Citrate lyase beta chain (EC 4.1.3.6)	-3.54728	7.84084	0.03204	down	-1.6821	32.16691	0.29114	-	128.19622	mono	mono
CH	Unclassified	Unclassified	Protein of unknown function DUF1446	NA	35.76482	0.03343	up	NA	0	0.65711	-	0.31413	mono	mono
CH	Cell Wall and Capsule	Peptidoglycan Biosynthesis	Murein-DD-endopeptidase (EC 3.4.99.-)	-2.76244	3.26276	0.0128	down	-0.08573	23.26711	0.96717	-	29.86045	mono	mono
CH	Amino Acids	Methionine and cysteine metabolism in plants	5-methyltetrahydropteroyltriglutamate--homocysteine methyltransferase (EC 2.1.1.14)	-1.58635	46.40608	0.04847	down	-1.86614	41.39688	0.03047	down	182.49489	DOWNcore	core
CH	Vitamins	Test - DHFR	5-methyltetrahydropteroyltriglutamate--homocysteine methyltransferase (EC 2.1.1.14)	-1.58635	46.40608	0.04847	down	-1.86614	41.39688	0.03047	down	182.49489	DOWNcore	core
CH	Carbohydrates	Folate-mediated one-carbon metabolism in plants	5-methyltetrahydropteroyltriglutamate--homocysteine methyltransferase (EC 2.1.1.14)	-1.58635	46.40608	0.04847	down	-1.86614	41.39688	0.03047	down	182.49489	DOWNcore	core
CH	Membrane Transport	Type III secretion system orphans	BarA-associated response regulator UvrY (= GacA = SirA)	1.23667	244.13653	0.12477	-	1.86727	415.24855	0.03734	up	139.25023	poly	poly
CH	Regulation and Cell signaling	Quorum sensing regulation in Pseudomonas	BarA-associated response regulator UvrY (= GacA = SirA)	1.23667	244.13653	0.12477	-	1.86727	415.24855	0.03734	up	139.25023	poly	poly
CH	RNA Metabolism	RNA processing and degradation, bacterial	3'-to-5' exoribonuclease RNase R	2.01714	2656.98666	0.00221	up	0.15747	789.04811	0.80724	-	862.82206	mono	mono
Nuc	Membrane Transport	General Secretion Pathway	General secretion pathway protein L	6.16854	241.06153	0.0198	up	5.19196	199.21461	0.04599	up	3.36409	UPcore	core
CH	Protein Metabolism	Protein Acetylation and Deacetylation in Bacteria	Propionate--CoA ligase (EC 6.2.1.17)	-0.20664	42.04411	0.79187	-	3.30482	517.48438	0.00126	up	64.07031	poly	poly
CH	Carbohydrates	Methylcitrate cycle	Propionate--CoA ligase (EC 6.2.1.17)	-0.20664	42.04411	0.79187	-	3.30482	517.48438	0.00126	up	64.07031	poly	poly
Nuc	Miscellaneous	Omega-amidase KE	Methionine aminotransferase, PLP-dependent	-3.37457	3.17478	0.01359	down	-2.43347	5.43145	0.0706	-	34.13311	mono	mono
Nuc	Amino Acids	Methionine Salvage	Methionine aminotransferase, PLP-dependent	-3.37457	3.17478	0.01359	down	-2.43347	5.43145	0.0706	-	34.13311	mono	mono
CH	Photosynthesis	Photosystem I	photosystem I P700 chlorophyll a apoprotein subunit Ia (PsaA)	NA	0.78055	0.00708	down	NA	0	5.6e-4	down	12.37062	DOWNcore	core
CH	RNA Metabolism	tRNA mods Archaea	Methylthioadenosine deaminase	-4.24121	5.8285	0.0069	down	-4.36165	5.64046	0.00829	down	151.55866	DOWNcore	core
CH	Miscellaneous	Single-Rhodanese-domain proteins	Thiosulfate sulfurtransferase GlpE (EC 2.8.1.1)	0.44361	21.90028	0.6165	-	2.70781	113.53941	0.012	up	21.61002	poly	poly
CH	Carbohydrates	Glycerol and Glycerol-3-phosphate Uptake and Utilization	Thiosulfate sulfurtransferase GlpE (EC 2.8.1.1)	0.44361	21.90028	0.6165	-	2.70781	113.53941	0.012	up	21.61002	poly	poly
CH	Amino Acids	Cysteine Biosynthesis	Phosphoadenylyl-sulfate reductase [thioredoxin] (EC 1.8.4.8)	-1.71353	227.12816	0.01871	down	-2.22646	171.67784	0.00607	down	998.99706	DOWNcore	core
CH	Sulfur Metabolism	Inorganic Sulfur Assimilation	Phosphoadenylyl-sulfate reductase [thioredoxin] (EC 1.8.4.8)	-1.71353	227.12816	0.01871	down	-2.22646	171.67784	0.00607	down	998.99706	DOWNcore	core
Nuc	Carbohydrates	Lactate utilization	Lactate-responsive regulator LldR in Enterobacteria, GntR family	-4.95516	1.91599	0.02851	down	-2.55179	6.51558	0.22665	-	41.43933	mono	mono
Nuc	Unclassified	Unclassified	AMP-dependent synthetase/ligase in alkane synthesis cluster	7.97032	8.24535	0.0443	up	8.55577	11.87966	0.04104	up	0	UPcore	core
CH	Unclassified	Unclassified	Methyl-accepting chemotaxis protein, hemolysin secretion protein HylB	10.98607	49.6043	0.00806	up	5.78441	1.98484	0.12633	-	0	mono	mono
CH	Unclassified	Unclassified	General secretion pathway protein N	5.57991	1.12724	0.11392	-	10.12209	29.48405	0.00974	up	0	poly	poly
CH	Amino Acids	Arginine deiminase and agmatine deiminase pathways in Streptococci	Asparaginyl-tRNA synthetase (EC 6.1.1.22)	-0.78078	106.27396	0.2025	-	2.63956	1232.48389	0.00163	up	246.72209	poly	poly
CH	RNA Metabolism	tRNA mods Archaea	Asparaginyl-tRNA synthetase (EC 6.1.1.22)	-0.78078	106.27396	0.2025	-	2.63956	1232.48389	0.00163	up	246.72209	poly	poly
CH	Protein Metabolism	tRNA synthetase relationships	Asparaginyl-tRNA synthetase (EC 6.1.1.22)	-0.78078	106.27396	0.2025	-	2.63956	1232.48389	0.00163	up	246.72209	poly	poly
CH	Photosynthesis	Photosystem II	Photosystem II CP43 protein (PsbC)	NA	0	0.00565	down	NA	0	0.001	down	11.7853	DOWNcore	core
CH	Unclassified	CBSS-195102.1.peg.963	Putrescine transport ATP-binding protein PotA (TC 3.A.1.11.1)	3.95166	756.98349	1.9e-4	up	-2.058	12.48584	0.00942	down	65.37704	monoUP-polyDOWN	mixed
CH	Amino Acids	Polyamine Metabolism	Putrescine transport ATP-binding protein PotA (TC 3.A.1.11.1)	3.95166	756.98349	1.9e-4	up	-2.058	12.48584	0.00942	down	65.37704	monoUP-polyDOWN	mixed
CH	Membrane Transport	CBSS-195102.1.peg.963	Putrescine transport ATP-binding protein PotA (TC 3.A.1.11.1)	3.95166	756.98349	1.9e-4	up	-2.058	12.48584	0.00942	down	65.37704	monoUP-polyDOWN	mixed
CH	Unclassified	Unclassified	Allantoinase (EC 3.5.2.5)	5.30172	10.17368	0.06682	-	9.41017	182.02594	0.00895	up	0.62826	poly	poly
CH	Protein Metabolism	Ribosome SSU eukaryotic and archaeal	SSU ribosomal protein S27Ae	NA	0	0.04035	down	NA	0	0.07378	-	1.38253	mono	mono
CH	Stress Response	Rubrerythrin	Rubredoxin-NAD(+) reductase (EC 1.18.1.1)	-3.54142	17.86294	0.00178	down	-2.97492	28.67573	0.0066	down	269.22637	DOWNcore	core
CH	Potassium metabolism	Glutathione-regulated potassium-efflux system and associated functions	Rubredoxin-NAD(+) reductase (EC 1.18.1.1)	-3.54142	17.86294	0.00178	down	-2.97492	28.67573	0.0066	down	269.22637	DOWNcore	core
CH	Respiration	Terminal cytochrome oxidases	putative Cytochrome bd2, subunit I	-3.32707	81.96276	0.00998	down	-4.8812	31.23555	0.00159	down	1076.26442	DOWNcore	core
Nuc	Unclassified	Unclassified	[NiFe] hydrogenase nickel incorporation protein HypA	7.04864	4.35765	0.04936	up	6.24967	2.07774	0.08842	-	0	mono	mono
CH	Membrane Transport	ABC transporter branched-chain amino acid (TC 3.A.1.4.1)	Branched-chain amino acid transport system permease protein LivM (TC 3.A.1.4.1)	0.99191	569.81443	0.12393	-	-2.67435	49.16031	7.2e-4	down	388.82966	poly	poly
CH	Vitamins	coA-FolK	Pantothenate kinase (EC 2.7.1.33)	2.14583	11.26307	0.13715	-	3.67235	36.15392	0.0291	up	3.52116	poly	poly
CH	Unclassified	CoA Test	Pantothenate kinase (EC 2.7.1.33)	2.14583	11.26307	0.13715	-	3.67235	36.15392	0.0291	up	3.52116	poly	poly
CH	Membrane Transport	Ton and Tol transport systems	Putative TolA protein	1.003	0.71517	0.58939	-	4.87916	7.67368	0.0178	up	0.2986	poly	poly
CH	Sulfur Metabolism	Inorganic Sulfur Assimilation	Adenylylsulfate reductase alpha-subunit (EC 1.8.99.2)	-2.54048	2.43113	0.04963	down	-4.7521	0.87809	0.00732	down	18.82761	DOWNcore	core
CH	Respiration	Respiration HGM	Adenylylsulfate reductase alpha-subunit (EC 1.8.99.2)	-2.54048	2.43113	0.04963	down	-4.7521	0.87809	0.00732	down	18.82761	DOWNcore	core
Nuc	Unclassified	Unclassified	Membrane protein YcjF	10.74344	55.52147	0.00912	up	9.18465	28.60335	0.02159	up	0	UPcore	core
CH	RNA Metabolism	rRNA modification bacteria	LSU m3Psi1915 methyltransferase RlmH	1.36749	374.1891	0.02057	up	0.05667	165.28873	0.95337	-	192.64294	mono	mono
CH	Miscellaneous	IojapClusters	LSU m3Psi1915 methyltransferase RlmH	1.36749	374.1891	0.02057	up	0.05667	165.28873	0.95337	-	192.64294	mono	mono
CH	Regulation and Cell signaling	Iojap	LSU m3Psi1915 methyltransferase RlmH	1.36749	374.1891	0.02057	up	0.05667	165.28873	0.95337	-	192.64294	mono	mono
CH	Vitamins	NAD and NADP cofactor biosynthesis global	LSU m3Psi1915 methyltransferase RlmH	1.36749	374.1891	0.02057	up	0.05667	165.28873	0.95337	-	192.64294	mono	mono
CH	Protein Metabolism	Ribosome biogenesis bacterial	LSU m3Psi1915 methyltransferase RlmH	1.36749	374.1891	0.02057	up	0.05667	165.28873	0.95337	-	192.64294	mono	mono
CH	Unclassified	PROSC YggS	LSU m3Psi1915 methyltransferase RlmH	1.36749	374.1891	0.02057	up	0.05667	165.28873	0.95337	-	192.64294	mono	mono
CH	Amino Acids	Cysteine Biosynthesis	Cystathionine gamma-lyase (EC 4.4.1.1)	-2.62049	17.04185	3.3e-4	down	-1.0954	54.07535	0.06578	-	143.13286	mono	mono
CH	Metabolite processes	TN RidA: all subgroups, 981 genomes PLP	Cystathionine gamma-lyase (EC 4.4.1.1)	-2.62049	17.04185	3.3e-4	down	-1.0954	54.07535	0.06578	-	143.13286	mono	mono
CH	Amino Acids	Branched chain amino acid degradation regulons	3-hydroxyisobutyrate dehydrogenase (EC 1.1.1.31)	1.32436	141.20851	0.05154	-	2.47795	340.89946	0.00291	up	75.47661	poly	poly
CH	Carbohydrates	Isobutyryl-CoA to Propionyl-CoA Module	3-hydroxyisobutyrate dehydrogenase (EC 1.1.1.31)	1.32436	141.20851	0.05154	-	2.47795	340.89946	0.00291	up	75.47661	poly	poly
CH	Unclassified	Unclassified	Sucrose repressor, LacI family, Shewanella subfamily	12.2212	626.33292	0.00136	up	9.31292	93.05573	0.00668	up	0.28308	UPcore	core
Nuc	Protein Metabolism	Protein chaperones	Chaperone protein HscA	1.38293	1052.1592	0.03884	up	1.58803	987.31981	0.02526	up	410.66681	UPcore	core
Nuc	Vitamins	Fe-S cluster assembly	Chaperone protein HscA	1.38293	1052.1592	0.03884	up	1.58803	987.31981	0.02526	up	410.66681	UPcore	core
CH	Stress Response	Universal stress protein family	Universal stress protein E	0.96873	43.24414	0.55389	-	4.64031	592.82113	0.02696	up	28.77106	poly	poly
Nuc	Regulation and Cell signaling	Orphan regulatory proteins	Putative sensor-like histidine kinase YfhK	6.91488	22.35537	0.0338	up	6.95968	18.81372	0.03931	up	0.31413	UPcore	core
CH	Regulation and Cell signaling	Plastidial (p)ppGpp-mediated response in plants	GTP pyrophosphokinase (EC 2.7.6.5), (p)ppGpp synthetase I	-1.98646	68.17154	0.00279	down	1.74254	979.67862	0.01245	up	366.15297	monoDOWN-polyUP	mixed
CH	Unclassified	Unclassified	Transcriptional regulator of the arabinose operon in Shewanella, GntR family	2.56557	4.67294	0.20677	-	6.68528	87.12836	0.01317	up	1.02183	poly	poly
Nuc	Nitrogen Metabolism	Nitrate and nitrite ammonification	Nitrite reductase probable [NAD(P)H] subunit (EC 1.7.1.4)	-2.64359	9.21024	0.00585	down	-2.17531	10.90323	0.01955	down	58.2297	DOWNcore	core
Nuc	Respiration	CO Dehydrogenase	Carbon monoxide dehydrogenase form I, large chain( EC:1.2.99.2 )	-2.22514	16.3927	0.04188	down	-2.49707	11.55969	0.03097	down	74.51055	DOWNcore	core
CH	Fatty Acids and Lipids	Unsaturated Fatty Acid Metabolism	POSSIBLE LINOLEOYL-CoA DESATURASE (DELTA(6)-DESATURASE)	-5.1167299999999996	1.11092	0.04709	down	-5.58112	1.48009	0.05081	-	33.57605	mono	mono
CH	Cell Wall and Capsule	mycolic acid synthesis	POSSIBLE LINOLEOYL-CoA DESATURASE (DELTA(6)-DESATURASE)	-5.1167299999999996	1.11092	0.04709	down	-5.58112	1.48009	0.05081	-	33.57605	mono	mono
CH	Motility and Chemotaxis	Flagellum	Flagellar biosynthesis protein FlhA	1.12484	401.2139	0.16229	-	2.03577	813.09103	0.02616	up	253.2475	poly	poly
CH	Respiration	Anaerobic respiratory reductases	Ferredoxin reductase	-1.93907	16.31469	0.00591	down	-2.44445	12.300230000000001	0.00173	down	83.47319	DOWNcore	core
CH	Amino Acids	Branched chain amino acid degradation regulons	Succinyl-CoA:3-ketoacid-coenzyme A transferase subunit A (EC 2.8.3.5)	2.42955	1338.50526	0.00459	up	2.50136	1511.28693	0.00501	up	334.13637	UPcore	core
CH	Metabolism of Aromatic Compounds	Protocatechuate branch of beta-ketoadipate pathway	Succinyl-CoA:3-ketoacid-coenzyme A transferase subunit A (EC 2.8.3.5)	2.42955	1338.50526	0.00459	up	2.50136	1511.28693	0.00501	up	334.13637	UPcore	core
CH	Carbohydrates	Citrate Metabolism KE3	Succinyl-CoA:3-ketoacid-coenzyme A transferase subunit A (EC 2.8.3.5)	2.42955	1338.50526	0.00459	up	2.50136	1511.28693	0.00501	up	334.13637	UPcore	core
CH	Nucleosides and Nucleotides	Purine Utilization	Xanthine/uracil/thiamine/ascorbate permease family protein	-0.95115	42.34398	0.18324	-	-1.54004	31.31015	0.04663	down	111.09823	poly	poly
CH	Membrane Transport	Purine Utilization	Xanthine/uracil/thiamine/ascorbate permease family protein	-0.95115	42.34398	0.18324	-	-1.54004	31.31015	0.04663	down	111.09823	poly	poly
CH	Vitamins	B12 Cobalamin HMP	Cobalt-precorrin-6 synthase, anaerobic	4.7872	52.25073	0.00362	up	-2.75288	1.13378	0.10912	-	2.5459	mono	mono
CH	Protein Metabolism	Periplasmic disulfide interchange	Thiol:disulfide interchange protein DsbC	1.11495	310.42822	0.044	up	1.31771	384.25072	0.02653	up	192.02369	UPcore	core
CH	Vitamins	YgfZ	Thiol:disulfide interchange protein DsbC	1.11495	310.42822	0.044	up	1.31771	384.25072	0.02653	up	192.02369	UPcore	core
Nuc	Unclassified	Unclassified	MSHA biogenesis protein MshL	4.59194	161.76318	0.0303	up	4.58247	140.07684	0.03675	up	6.79028	UPcore	core
CH	Protein Metabolism	Protein chaperones	DnaJ-class molecular chaperone CbpA	5.36337	904.01933	1.4e-4	up	2.83717	168.91902	0.00672	up	30.01656	UPcore	core
CH	Carbohydrates	Acetoin, butanediol metabolism	2,3-butanediol dehydrogenase, R-alcohol forming, (R)- and (S)-acetoin-specific (EC 1.1.1.4)	NA	34.78073	0.03078	up	NA	0	0.05377	-	3.04814	mono	mono
CH	Carbohydrates	Deoxyribose and Deoxynucleoside Catabolism	Predicted nucleoside ABC transporter, permease 2 component	3.24821	107.42994	0.00182	up	-2.53248	2.15751	0.00947	down	15.56213	monoUP-polyDOWN	mixed
CH	Membrane Transport	Deoxyribose and Deoxynucleoside Catabolism	Predicted nucleoside ABC transporter, permease 2 component	3.24821	107.42994	0.00182	up	-2.53248	2.15751	0.00947	down	15.56213	monoUP-polyDOWN	mixed
CH	Protein Metabolism	tRNA synthetase relationships	Glutamyl-tRNA(Gln) synthetase (EC 6.1.1.24)	-0.49251	342.15435	0.40441	-	-4.946	17.49378	0	down	649.10153	poly	poly
CH	Unclassified	Unclassified	MSHA biogenesis protein MshJ	3.74591	3.33362	0.03063	up	8.55604	100.04814	5.9e-4	up	0.2986	UPcore	core
CH	Vitamins	Coenzyme F420 synthesis	7,8-didemethyl-8-hydroxy-5-deazariboflavin synthase subunit 2	-1.39591	20.7312	0.12014	-	-4.4674	2.65088	5.5e-4	down	70.91541	poly	poly
CH	Unclassified	Unclassified	Vanillate O-demethylase oxygenase subunit (EC 1.14.13.82)	NA	30.00196	0.03552	up	NA	0	0.42326	-	0.94239	mono	mono
CH	Protein Metabolism	Protein chaperones	Chaperone protein HtpG	-0.77982	681.61245	0.24311	-	-1.43468	463.83519	0.04564	down	1568.15972	poly	poly
CH	Regulation and Cell signaling	cAMP signaling in bacteria	ATP-dependent Clp protease proteolytic subunit (EC 3.4.21.92)	-1.24039	675.40366	0.02342	down	-1.36333	677.1631	0.01858	down	2101.45401	DOWNcore	core
CH	Protein Metabolism	Proteasome bacterial	ATP-dependent Clp protease proteolytic subunit (EC 3.4.21.92)	-1.24039	675.40366	0.02342	down	-1.36333	677.1631	0.01858	down	2101.45401	DOWNcore	core
CH	Stress Response	At5g63290	ATP-dependent Clp protease proteolytic subunit (EC 3.4.21.92)	-1.24039	675.40366	0.02342	down	-1.36333	677.1631	0.01858	down	2101.45401	DOWNcore	core
CH	Amino Acids	Isoleucine degradation	Acyl-CoA dehydrogenase, short-chain specific (EC 1.3.99.2)	-1.68663	257.71125	0.03934	down	2.96748	7161.12701	0.00526	up	1144.66239	monoDOWN-polyUP	mixed
CH	Metabolism of Aromatic Compounds	Anaerobic Aromatic Degredation (benzoate)	Acyl-CoA dehydrogenase, short-chain specific (EC 1.3.99.2)	-1.68663	257.71125	0.03934	down	2.96748	7161.12701	0.00526	up	1144.66239	monoDOWN-polyUP	mixed
CH	Vitamins	Methanofuran erick jmorales	Biosynthetic Aromatic amino acid aminotransferase beta (EC 2.6.1.57)	-3.91667	9.41951	9e-05	down	-3.32445	15.59374	2.4e-4	down	197.16198	DOWNcore	core
CH	Amino Acids	Phenylalanine and Tyrosine Branches from Chorismate	Biosynthetic Aromatic amino acid aminotransferase beta (EC 2.6.1.57)	-3.91667	9.41951	9e-05	down	-3.32445	15.59374	2.4e-4	down	197.16198	DOWNcore	core
Nuc	Carbohydrates	Calvin-Benson cycle	Phosphoribulokinase (EC 2.7.1.19) homolog, function unknown	7.30541	76.64112	0.02504	up	6.80774	44.75067	0.03983	up	0.94239	UPcore	core
CH	Unclassified	Unclassified	Oligogalacturonate lyase (EC 4.2.2.6)	NA	94.91938	0.0026	up	NA	0	1	-	0	mono	mono
CH	Membrane Transport	ABC transporter alkylphosphonate (TC 3.A.1.9.1)	Phosphonate ABC transporter phosphate-binding periplasmic component (TC 3.A.1.9.1)	0.977	314.19277	0.36485	-	-2.62626	28.32218	0.02426	down	213.30406	poly	poly
CH	Vitamins	Fe-S cluster assembly	Putative iron-sulfur cluster assembly scaffold protein for SUF system, SufE2	NA	1.94985	0.58387	-	NA	0	0.0453	down	4.90369	poly	poly
Nuc	Membrane Transport	ABC transporter oligopeptide (TC 3.A.1.5.1)	Oligopeptide transport system permease protein OppB (TC 3.A.1.5.1)	-2.15984	43.7261	0.00832	down	-2.0934	40.92199	0.01206	down	197.88347	DOWNcore	core
CH	Protein Metabolism	Proteolysis in bacteria, ATP-dependent	ATPase, AFG1 family	1.24049	416.00327	0.04789	up	-0.38723	145.84175	0.54562	-	236.18976	mono	mono
CH	Cell Wall and Capsule	Peptidoglycan Biosynthesis	Cell division protein FtsI [Peptidoglycan synthetase] (EC 2.4.1.129)	1.27169	523.59304	0.01137	up	-0.40069	178.56303	0.39376	-	295.06411	mono	mono
CH	Motility and Chemotaxis	Flagellum in Campylobacter	Cell division protein FtsI [Peptidoglycan synthetase] (EC 2.4.1.129)	1.27169	523.59304	0.01137	up	-0.40069	178.56303	0.39376	-	295.06411	mono	mono
CH	Cell Division and Cell Cycle	Bacterial Cytoskeleton	Cell division protein FtsI [Peptidoglycan synthetase] (EC 2.4.1.129)	1.27169	523.59304	0.01137	up	-0.40069	178.56303	0.39376	-	295.06411	mono	mono
CH	Protein Metabolism	Protein degradation	Oligopeptidase A (EC 3.4.24.70)	2.85562	722.61955	7.5e-4	up	1.74101	362.17925	0.01661	up	136.28594	UPcore	core
CH	DNA Metabolism	Type I Restriction-Modification	Type I restriction-modification system, restriction subunit R (EC 3.1.21.3)	1.33149	544.7713	0.04804	up	0.71277	389.42944	0.28751	-	289.10399	mono	mono
CH	Virulence	MRSA analysis Oli	Type I restriction-modification system, restriction subunit R (EC 3.1.21.3)	1.33149	544.7713	0.04804	up	0.71277	389.42944	0.28751	-	289.10399	mono	mono
CH	Motility and Chemotaxis	Flagellar motility	Flagellin	-2.53519	24.35159	0.13404	-	-5.46554	3.40452	0.01362	down	196.18923	poly	poly
CH	Miscellaneous	IojapClusters	LSU ribosomal protein L21p	-2.36041	337.2638	0.0088	down	-0.71174	1169.26334	0.41022	-	2401.58966	mono	mono
CH	Protein Metabolism	Single-copy ribosomal proteins	LSU ribosomal protein L21p	-2.36041	337.2638	0.0088	down	-0.71174	1169.26334	0.41022	-	2401.58966	mono	mono
CH	Regulation and Cell signaling	Iojap	LSU ribosomal protein L21p	-2.36041	337.2638	0.0088	down	-0.71174	1169.26334	0.41022	-	2401.58966	mono	mono
CH	Unclassified	PROSC YggS	LSU ribosomal protein L21p	-2.36041	337.2638	0.0088	down	-0.71174	1169.26334	0.41022	-	2401.58966	mono	mono
CH	Unclassified	PCB5530 pyridoxine salvage	Benzoate transport protein	4.91631	91.62355	0.02543	up	2.43973	17.94319	0.21397	-	3.99235	mono	mono
CH	Metabolism of Aromatic Compounds	Benzoate degradation	Benzoate transport protein	4.91631	91.62355	0.02543	up	2.43973	17.94319	0.21397	-	3.99235	mono	mono
CH	Membrane Transport	PCB5530 pyridoxine salvage	Benzoate transport protein	4.91631	91.62355	0.02543	up	2.43973	17.94319	0.21397	-	3.99235	mono	mono
CH	Unclassified	Unclassified	Capsular polysaccharide synthesis enzyme CpsA, sugar transferase	3.27432	3.3027	0.12051	-	6.22332	28.60964	0.01661	up	0.44014	poly	poly
Nuc	Vitamins	Ubiquinone Biosynthesis	Chorismate--pyruvate lyase (EC 4.1.3.40)	2.58705	47.85256	0.02293	up	2.84688	48.83501	0.01872	up	7.82581	UPcore	core
Nuc	Miscellaneous	EC 4.1.3.- Oxo-acid-lyases	Chorismate--pyruvate lyase (EC 4.1.3.40)	2.58705	47.85256	0.02293	up	2.84688	48.83501	0.01872	up	7.82581	UPcore	core
Nuc	Virulence	Mycobacterium virulence operon involved in lipid degradation	Chorismate--pyruvate lyase (EC 4.1.3.40)	2.58705	47.85256	0.02293	up	2.84688	48.83501	0.01872	up	7.82581	UPcore	core
CH	Unclassified	Unclassified	Similar to C-terminal Zn-finger domain of DNA topoisomerase I	8.9915	227.96694	0.0018600000000000001	up	8.00224	124.51955	0.00399	up	1.13232	UPcore	core
CH	Unclassified	Unclassified	Sodium-transporting N-ATPase alpha subunit	7.72905	5.10892	0.04943	up	6.04667	5.18033	0.13236	-	0	mono	mono
CH	Potassium metabolism	Potassium homeostasis	Potassium efflux system KefA protein	0.41916	336.36901	0.41817	-	1.97565	1071.33924	0.00258	up	341.30488	poly	poly
CH	Carbohydrates	Mannitol Utilization	Hydrolase in polyol utilization gene cluster, haloacid dehalogenase-like family	-0.91922	0.98534	0.57719	-	4.19932	39.14535	0.03252	up	2.64087	poly	poly
Nuc	Regulation and Cell signaling	DNA-binding regulatory proteins, strays	LysR family transcriptional regulator YbhD	NA	0	0.01057	down	NA	0.8776	0.24974	-	3.09654	mono	mono
CH	Carbohydrates	Entner-Doudoroff Pathway	Uronate isomerase (EC 5.3.1.12)	3.49709	114.06517	0.01965	up	1.56163	30.7706	0.24874	-	13.45455	mono	mono
CH	Carbohydrates	Serine-glyoxylate cycle	Serine--pyruvate aminotransferase (EC 2.6.1.51)	3.12156	397.15864	4.3e-4	up	3.4226	542.14818	2.5e-4	up	62.538	UPcore	core
CH	Unclassified	Unclassified	Programmed cell death toxin ChpB	NA	0	0.40287	-	NA	2.7271	0.0493	up	0.28308	poly	poly
CH	Motility and Chemotaxis	Bacterial Chemotaxis	Ribose ABC transporter, periplasmic ribose-binding protein RbsB (TC 3.A.1.2.1)	2.91685	765.65795	0.05807	-	-3.17822	12.05193	0.03696	down	131.76872	poly	poly
CH	Membrane Transport	Bacterial Chemotaxis	Ribose ABC transporter, periplasmic ribose-binding protein RbsB (TC 3.A.1.2.1)	2.91685	765.65795	0.05807	-	-3.17822	12.05193	0.03696	down	131.76872	poly	poly
CH	Vitamins	NAD and NADP cofactor biosynthesis global	Nicotinamidase/isochorismatase family protein	NA	0	0.01184	down	NA	1.48009	0.16689	-	4.05445	mono	mono
CH	Carbohydrates	Starch biosynthesis in plants	Glucose-1-phosphate adenylyltransferase (EC 2.7.7.27)	7.36922	1542.03701	0.00126	up	7.73152	2142.87261	0.00121	up	11.98069	UPcore	core
CH	Unclassified	Unclassified	N-acetylgalactosamine kinase, ROK-type (EC 2.7.1.157)	2.0439600000000002	1.41939	0.50429	-	7.13387	21.4701	0.04911	up	0.31413	poly	poly
CH	Sulfur Metabolism	CFE Sulfur Oxidation	Sulfur oxidation molybdopterin C protein	-2.94013	9.86414	0.0302	down	-3.38144	7.94503	0.02298	down	101.97019	DOWNcore	core
CH	Carbohydrates	Pentose phosphate pathway in plants	Ribose-phosphate pyrophosphokinase (EC 2.7.6.1)	-1.81638	454.6611	0.00614	down	-1.79356	500.83009	0.00852	down	2154.81376	DOWNcore	core
CH	Vitamins	YgfZ	Ribose-phosphate pyrophosphokinase (EC 2.7.6.1)	-1.81638	454.6611	0.00614	down	-1.79356	500.83009	0.00852	down	2154.81376	DOWNcore	core
CH	Nucleosides and Nucleotides	De Novo Purine Biosynthesis	Ribose-phosphate pyrophosphokinase (EC 2.7.6.1)	-1.81638	454.6611	0.00614	down	-1.79356	500.83009	0.00852	down	2154.81376	DOWNcore	core
CH	Amino Acids	Arginine metabolism and urea cycle in plants	Acetylornithine aminotransferase (EC 2.6.1.11)	2.62974	2445.61697	5.4e-4	up	2.22041	2029.22737	0.00205	up	532.07647	UPcore	core
CH	Metabolite processes	RidA family in 981 representative prokaryotes	Acetylornithine aminotransferase (EC 2.6.1.11)	2.62974	2445.61697	5.4e-4	up	2.22041	2029.22737	0.00205	up	532.07647	UPcore	core
CH	Unclassified	PROSC YggS	Acetylornithine aminotransferase (EC 2.6.1.11)	2.62974	2445.61697	5.4e-4	up	2.22041	2029.22737	0.00205	up	532.07647	UPcore	core
CH	Miscellaneous	Omega-amidase KE2	Acetylornithine aminotransferase (EC 2.6.1.11)	2.62974	2445.61697	5.4e-4	up	2.22041	2029.22737	0.00205	up	532.07647	UPcore	core
Nuc	RNA Metabolism	tRNA modification Archaea	Protein RtcB	NA	0	0.00569	down	NA	3.77448	0.90764	-	2.42171	mono	mono
CH	Unclassified	Unclassified	Beta-lactamase repressor BlaI	3.63825	0.78055	0.28986	-	10.26193	32.5935	0.01249	up	0	poly	poly
Nuc	Amino Acids	Histidine Degradation in Streptococci	Formiminoglutamic iminohydrolase (EC 3.5.3.13)	1.73648	83.76561	0.03343	up	1.42282	57.90608	0.08619	-	25.00152	mono	mono
CH	Carbohydrates	Lactate utilization	Predicted L-lactate dehydrogenase, hypothetical protein subunit SO1518	0.61271	0.72064	0.85616	-	5.86611	8.27332	0.04781	up	0.28308	poly	poly
CH	Miscellaneous	COG2016	Translation initiation factor SUI1-related protein	2.04295	183.6966	0.00977	up	1.35334	125.15936	0.0693	-	61.59926	mono	mono
CH	Protein Metabolism	Translation initiation factors bacterial	Translation initiation factor SUI1-related protein	2.04295	183.6966	0.00977	up	1.35334	125.15936	0.0693	-	61.59926	mono	mono
CH	Motility and Chemotaxis	Flagellar motility	Chemotaxis protein CheV (EC 2.7.3.-)	4.02142	9205.8138	0.00119	up	2.64668	3864.6321	0.01403	up	752.2081	UPcore	core
CH	Photosynthesis	Phycobilisome	Phycoerythrin beta chain	NA	0.78055	0.26228	-	NA	0	0.01553	down	8.77549	poly	poly
CH	Carbohydrates	Pyruvate metabolism I: anaplerotic reactions, PEP	Malate Na(+) symporter	0.88388	41.75673	0.22587	-	2.34974	125.43418	0.00832	up	30.03122	poly	poly
CH	DNA Metabolism	2-phosphoglycolate salvage	2-deoxyglucose-6-phosphate hydrolase YniC	6.05604	39.79395	0.04678	up	5.94846	39.57268	0.05853	-	0.75427	mono	mono
CH	Amino Acids	Glutamine, Glutamate, Aspartate and Asparagine Biosynthesis	Glutamine synthetase (EC 6.3.1.2)	-3.4146	3.27178	0.01196	down	-3.52233	3.46715	0.01539	down	50.31074	DOWNcore	core
Nuc	Nucleosides and Nucleotides	De Novo Purine Biosynthesis	Phosphoribosylglycinamide formyltransferase 2 (EC 2.1.2.-)	-1.85926	77.08978	0.00938	down	-1.74903	75.93114	0.01606	down	287.71504	DOWNcore	core
CH	Protein Metabolism	Ribosome biogenesis bacterial	Ribosomal protein S6 glutaminyl transferase	1.4358900000000001	1366.65282	0.01415	up	1.51741	1583.75693	0.01423	up	680.69784	UPcore	core
Nuc	Vitamins	B12 duf71	Choline kinase (EC 2.7.1.32)	-3.62493	0.2395	0.04653	down	-3.73155	0.47768	0.04944	down	2.4838	DOWNcore	core
Nuc	Fatty Acids and Lipids	Phosphatidylcholine biosynthesis in plants	Choline kinase (EC 2.7.1.32)	-3.62493	0.2395	0.04653	down	-3.73155	0.47768	0.04944	down	2.4838	DOWNcore	core
Nuc	Cell Wall and Capsule	Phosphorylcholine incorporation in LPS	Choline kinase (EC 2.7.1.32)	-3.62493	0.2395	0.04653	down	-3.73155	0.47768	0.04944	down	2.4838	DOWNcore	core
CH	Vitamins	Coenzyme F420 synthesis	7,8-didemethyl-8-hydroxy-5-deazariboflavin synthase subunit 1	NA	12.24228	0.92415	-	NA	0	0.0043	down	14.4919	poly	poly
CH	Carbohydrates	TCA cycle in plants	Dihydrolipoamide dehydrogenase of pyruvate dehydrogenase complex (EC 1.8.1.4)	1.63316	418.00984	0.0097	up	3.39009	1525.96993	9e-05	up	175.27166	UPcore	core
CH	Vitamins	Thiamine-biosynthesis	Dihydrolipoamide dehydrogenase of pyruvate dehydrogenase complex (EC 1.8.1.4)	1.63316	418.00984	0.0097	up	3.39009	1525.96993	9e-05	up	175.27166	UPcore	core
CH	Vitamins	Cobalamin synthesis	Cobalamin biosynthesis protein BluB	4.36964	70.64525	0.00654	up	-1.77059	1.03954	0.23016	-	4.62243	mono	mono
CH	Unclassified	NAD and NADP - test subsystem	Tryptophan 2,3-dioxygenase (EC 1.13.11.11)	-2.21262	17.8608	0.00319	down	0.36825	116.77728	0.61184	-	113.22037	mono	mono
CH	Vitamins	NAD and NADP cofactor biosynthesis global	Tryptophan 2,3-dioxygenase (EC 1.13.11.11)	-2.21262	17.8608	0.00319	down	0.36825	116.77728	0.61184	-	113.22037	mono	mono
CH	Amino Acids	Aromatic amino acid degradation	Tryptophan 2,3-dioxygenase (EC 1.13.11.11)	-2.21262	17.8608	0.00319	down	0.36825	116.77728	0.61184	-	113.22037	mono	mono
CH	Amino Acids	Proline, 4-hydroxyproline uptake and utilization	ProQ: influences osmotic activation of compatible solute ProP	3.71047	73.79123	0.02301	up	6.799	681.07686	0.00187	up	7.70344	UPcore	core
CH	Membrane Transport	HtrA and Sec secretion	Preprotein translocase subunit SecG (TC 3.A.5.1.1)	-1.61112	61.30986	0.0455	down	0.77495	361.80449	0.36284	-	257.26207	mono	mono
CH	Regulation and Cell signaling	Murein hydrolase regulation and cell death	Preprotein translocase subunit SecG (TC 3.A.5.1.1)	-1.61112	61.30986	0.0455	down	0.77495	361.80449	0.36284	-	257.26207	mono	mono
CH	Metabolism of Aromatic Compounds	Benzoate degradation	Ortho-halobenzoate 1,2-dioxygenase alpha-ISP protein OhbB	-0.48339	13.88191	0.67141	-	-3.56598	1.70115	0.01	down	25.84894	poly	poly
CH	Virulence	Arsenic resistance	Arsenic resistance protein ArsH	-0.60203	20.95665	0.56883	-	-2.86763	4.99023	0.01842	down	45.61251	poly	poly
Nuc	Nucleosides and Nucleotides	pyrimidine conversions	Thymidine phosphorylase (EC 2.4.2.4)	2.54132	1276.64418	0.01915	up	2.31101	931.93102	0.03675	up	225.93113	UPcore	core
Nuc	Carbohydrates	Deoxyribose and Deoxynucleoside Catabolism	Thymidine phosphorylase (EC 2.4.2.4)	2.54132	1276.64418	0.01915	up	2.31101	931.93102	0.03675	up	225.93113	UPcore	core
CH	Metabolism of Aromatic Compounds	Catechol branch of beta-ketoadipate pathway	3-oxoadipate CoA-transferase subunit B (EC 2.8.3.6)	2.8864	181.66789	0.01599	up	-1.81829	7.34161	0.09657	-	32.31685	mono	mono
CH	Unclassified	Glutaconate CoA-transferase or 3-oxoadipate CoA-transferase Subunits	3-oxoadipate CoA-transferase subunit B (EC 2.8.3.6)	2.8864	181.66789	0.01599	up	-1.81829	7.34161	0.09657	-	32.31685	mono	mono
CH	Carbohydrates	L-rhamnose utilization	Transcriptional regulator of rhamnose utilization, DeoR family	7.43796	22.47488	0.01558	up	7.65321	41.29009	0.01813	up	0.28308	UPcore	core
CH	Potassium metabolism	Potassium homeostasis	Potassium-transporting ATPase B chain (EC 3.6.3.12) (TC 3.A.3.7.1)	NA	0	0.03923	down	NA	2.78703	0.62007	-	5.45615	mono	mono
CH	Membrane Transport	Potassium homeostasis	Potassium-transporting ATPase B chain (EC 3.6.3.12) (TC 3.A.3.7.1)	NA	0	0.03923	down	NA	2.78703	0.62007	-	5.45615	mono	mono
CH	Respiration	Biogenesis of cytochrome c oxidases	Cytochrome oxidase biogenesis protein Cox11-CtaG, copper delivery to Cox1	-2.57908	37.73852	9.4e-4	down	-0.3634	193.8142	0.60354	-	320.85067	mono	mono
CH	Amino Acids	Cysteine Biosynthesis	Cysteine synthase B (EC 2.5.1.47)	-4.00841	12.39205	7e-05	down	-1.22	93.68893	0.07013	-	267.5003	mono	mono
CH	Motility and Chemotaxis	Bacterial Chemotaxis	Signal transduction histidine kinase CheA (EC 2.7.3.-)	3.62197	7802.72778	4.7e-4	up	2.52777	3949.0156699999998	0.00541	up	847.66503	UPcore	core
CH	Regulation and Cell signaling	Two-component regulatory systems in Campylobacter	Signal transduction histidine kinase CheA (EC 2.7.3.-)	3.62197	7802.72778	4.7e-4	up	2.52777	3949.0156699999998	0.00541	up	847.66503	UPcore	core
CH	Protein Metabolism	Ribosome LSU eukaryotic and archaeal	LSU ribosomal protein L31e	NA	0	0.14144	-	NA	0	0.03866	down	0	poly	poly
CH	Membrane Transport	Periplasmic-Binding-Protein-Dependent Transport System for alpha-Glucosides	Alpha-glucoside transport system permease protein AglG	8.09915	898.38427	5.1e-4	up	-0.65459	2.45922	0.70959	-	4.36858	mono	mono
CH	RNA Metabolism	ATP-dependent RNA helicases, bacterial	ATP-dependent RNA helicase NGO0650	-2.29393	8.7708	0.03347	down	-2.3192	9.77365	0.04246	down	59.01502	DOWNcore	core
CH	Carbohydrates	Glycolysis and Gluconeogenesis	Fructose-bisphosphate aldolase class I (EC 4.1.2.13)	-0.78061	43.67319	0.19067	-	2.65011	523.80196	0.00125	up	103.02307	poly	poly
Nuc	Amino Acids	Tryptophan synthesis	Tryptophan synthase beta chain like (EC 4.2.1.20)	0.11128	19.56606	0.97358	-	-3.71663	4.77518	0.04824	down	19.25951	poly	poly
Nuc	Protein Metabolism	Prolyl-tRNA synthetase associated editing enzymes	Tryptophan synthase beta chain like (EC 4.2.1.20)	0.11128	19.56606	0.97358	-	-3.71663	4.77518	0.04824	down	19.25951	poly	poly
Nuc	Unclassified	Chorismate: Intermediate for synthesis of Tryptophan, PAPA antibiotics, PABA, 3-hydroxyanthranilate and more.	Tryptophan synthase beta chain like (EC 4.2.1.20)	0.11128	19.56606	0.97358	-	-3.71663	4.77518	0.04824	down	19.25951	poly	poly
CH	Respiration	Respiration / HGM	Cytochrome c oxidase polypeptide I (EC 1.9.3.1)	-2.77593	277.95465	6.6e-4	down	-0.84993	1138.44729	0.20706	-	2642.2931	mono	mono
CH	Mitochondrial electron transport system in plants	Respiratory complex IV (terminal cytochrome c oxidase) in plants	Cytochrome c oxidase polypeptide I (EC 1.9.3.1)	-2.77593	277.95465	6.6e-4	down	-0.84993	1138.44729	0.20706	-	2642.2931	mono	mono
CH	Fatty Acids and Lipids	Isoprenoinds for Quinones	Dimethylallyltransferase (EC 2.5.1.1)	-2.30961	8.8427	0.00736	down	-1.41978	17.79424	0.081	-	58.03613	mono	mono
CH	Amino Acids	Histidine Degradation	Conserved hypothetical protein (perhaps related to histidine degradation)	7.04167	61.31909	7e-05	up	4.21946	9.16515	0.00164	up	0.59721	UPcore	core
CH	Unclassified	Unclassified	Xylose activator XylR (AraC family)	10.63102	221.70459	0.00266	up	1.82133	1.24479	0.5972	-	0.31413	mono	mono
CH	Photosynthesis	Photosystem II-type photosynthetic reaction center	Photosynthetic reaction center H subunit	-3.86525	1.14087	0.04818	down	-2.72142	1.8188	0.15481	-	14.9147	mono	mono
Nuc	RNA Metabolism	ATP-dependent RNA helicases, bacterial	ATP-dependent RNA helicase VCA0061	6.43872	292.32192	0.00183	up	6.29529	216.85773	0.00208	up	3.33122	UPcore	core
CH	Membrane Transport	Type IV pilus	Type IV pilus biogenesis protein PilN	-2.10294	37.71876	0.0214	down	1.07408	379.94849	0.25086	-	217.99423	mono	mono
CH	RNA Metabolism	tRNA modification yeast cytoplasmic	tRNA pseudouridine 13 synthase (EC 4.2.1.-)	1.95172	202.67426	0.02557	up	1.04779	117.8339	0.21397	-	71.44957	mono	mono
CH	Regulation and Cell signaling	DNA-binding regulatory proteins, strays	LysR family transcriptional regulator PA0133	6.3647	241.10561	0.0052	up	5.306	123.25573	0.0142	up	3.91291	UPcore	core
CH	Photosynthesis	Photosystem II	Photosystem II CP47 protein (PsbB)	NA	0.39028	0.01006	down	NA	0	4.7e-4	down	4.95026	DOWNcore	core
CH	Carbohydrates	Entner-Doudoroff Pathway	Gluconolactonase (EC 3.1.1.17)	3.32849	214.52126	0.00281	up	0.54662	32.9727	0.56464	-	29.58284	mono	mono
CH	Carbohydrates	D-galactarate, D-glucarate and D-glycerate catabolism - gjo	5-dehydro-4-deoxyglucarate dehydratase (EC 4.2.1.41)	6.11148	237.9153	0.01031	up	-2.24043	2.22014	0.30677	-	4.74844	mono	mono
CH	Nucleosides and Nucleotides	Xanthine Metabolism in Bacteria	Nucleoside permease NupC	-0.5483	8.44061	0.51406	-	3.14911	120.64238	0.00375	up	16.4059	poly	poly
CH	Carbohydrates	Deoxyribose and Deoxynucleoside Catabolism	Nucleoside permease NupC	-0.5483	8.44061	0.51406	-	3.14911	120.64238	0.00375	up	16.4059	poly	poly
CH	Membrane Transport	Xanthine Metabolism in Bacteria	Nucleoside permease NupC	-0.5483	8.44061	0.51406	-	3.14911	120.64238	0.00375	up	16.4059	poly	poly
CH	Nucleosides and Nucleotides	Purine conversions	Inosine-guanosine kinase (EC 2.7.1.73)	12.71656	162.26866	0.00251	up	11.23859	65.09413	0.0064	up	0	UPcore	core
CH	Amino Acids	Proline, 4-hydroxyproline uptake and utilization	Predicted regulator PutR for proline utilization, GntR family	4.84295	275.22702	0.0003	up	4.36963	219.17351	6.2e-4	up	12.77425	UPcore	core
CH	Cell Wall and Capsule	LOS core oligosaccharide biosynthesis	Lipopolysaccharide heptosyltransferase I (EC 2.4.1.-)	-4.35239	0.7288	0.00257	down	-0.5359	14.25436	0.66298	-	26.64154	mono	mono
Nuc	Amino Acids	Glutamate dehydrogenases	NADP-specific glutamate dehydrogenase (EC 1.4.1.4)	-3.05109	61.35108	0.00219	down	-1.44722	174.45125	0.10634	-	520.06386	mono	mono
CH	Membrane Transport	Transport of Manganese	Manganese ABC transporter, periplasmic-binding protein SitA	NA	0	0.03876	down	NA	0	0.07165	-	3.20703	mono	mono
CH	Virulence	Multidrug Resistance Efflux Pumps	Multi antimicrobial extrusion protein (Na(+)/drug antiporter), MATE family of MDR efflux pumps	2.29256	224.30886	0.01468	up	0.27086	59.91376	0.7802	-	61.22399	mono	mono
CH	Vitamins	Riboflavin, FMN and FAD metabolism Extended	Multi antimicrobial extrusion protein (Na(+)/drug antiporter), MATE family of MDR efflux pumps	2.29256	224.30886	0.01468	up	0.27086	59.91376	0.7802	-	61.22399	mono	mono
CH	Regulation and Cell signaling	Orphan regulatory proteins	Transcriptional regulatory protein RstA	5.11646	2154.84599	1.6e-4	up	3.54071	781.12826	0.00163	up	83.56451	UPcore	core
CH	Nucleosides and Nucleotides	Pyrimidine de novo biosynthesis in plants	Dihydroorotase (EC 3.5.2.3)	1.58351	1174.81096	0.01871	up	-0.84228	233.46877	0.17906	-	526.29258	mono	mono
CH	Regulation and Cell signaling	Zinc regulated enzymes	Dihydroorotase (EC 3.5.2.3)	1.58351	1174.81096	0.01871	up	-0.84228	233.46877	0.17906	-	526.29258	mono	mono
CH	Metabolite processes	RidA family in 981 representative prokaryotes	Dihydroorotase (EC 3.5.2.3)	1.58351	1174.81096	0.01871	up	-0.84228	233.46877	0.17906	-	526.29258	mono	mono
CH	Vitamins	YgfZ	Dihydroorotase (EC 3.5.2.3)	1.58351	1174.81096	0.01871	up	-0.84228	233.46877	0.17906	-	526.29258	mono	mono
CH	Cell Wall and Capsule	Capsular heptose biosynthesis	GDP-L-fucose synthetase (EC 1.1.1.271)	0.18084	182.67572	0.78773	-	-1.44307	64.58455	0.03055	down	222.10955	poly	poly
CH	Nucleotide sugars	GDP-sugars biosynthesis and interconversions in plants	GDP-L-fucose synthetase (EC 1.1.1.271)	0.18084	182.67572	0.78773	-	-1.44307	64.58455	0.03055	down	222.10955	poly	poly
CH	Unclassified	Unclassified	Two-component sensor histidine kinase, malate (EC 2.7.3.-)	NA	41.42438	0.01495	up	NA	0	1	-	0	mono	mono
CH	Carbohydrates	Fermentations in Streptococci	NAD(P) transhydrogenase subunit beta (EC 1.6.1.2)	-3.48574	95.42848	1e-05	down	-0.98258	596.17573	0.04755	down	1466.47539	DOWNcore	core
CH	Phosphorus Metabolism	Phosphate metabolism	NAD(P) transhydrogenase subunit beta (EC 1.6.1.2)	-3.48574	95.42848	1e-05	down	-0.98258	596.17573	0.04755	down	1466.47539	DOWNcore	core
CH	Vitamins	NAD and NADP cofactor biosynthesis global	NAD(P) transhydrogenase subunit beta (EC 1.6.1.2)	-3.48574	95.42848	1e-05	down	-0.98258	596.17573	0.04755	down	1466.47539	DOWNcore	core
CH	Amino Acids	Glutamine, glutamate, aspartate, asparagine metabolism in plants	Isocitrate dehydrogenase [NADP] (EC 1.1.1.42)	-0.42108	1207.94698	0.40465	-	1.90683	6608.69545	0.00314	up	2180.48269	poly	poly
CH	Carbohydrates	acinetobacter tca	Isocitrate dehydrogenase [NADP] (EC 1.1.1.42)	-0.42108	1207.94698	0.40465	-	1.90683	6608.69545	0.00314	up	2180.48269	poly	poly
CH	Vitamins	5-FCL-like protein	Isocitrate dehydrogenase [NADP] (EC 1.1.1.42)	-0.42108	1207.94698	0.40465	-	1.90683	6608.69545	0.00314	up	2180.48269	poly	poly
CH	Potassium metabolism	Glutathione-regulated potassium-efflux system and associated functions	diguanylate cyclase/phosphodiesterase (GGDEF & EAL domains) with PAS/PAC sensor(s)	4.79951	6069.23703	7e-05	up	3.86886	3473.0469	1.9e-4	up	295.5033	UPcore	core
CH	Stress Response	Bacterial hemoglobins	diguanylate cyclase/phosphodiesterase (GGDEF & EAL domains) with PAS/PAC sensor(s)	4.79951	6069.23703	7e-05	up	3.86886	3473.0469	1.9e-4	up	295.5033	UPcore	core
CH	Nucleosides and Nucleotides	De Novo Purine Biosynthesis	Phosphoribosylglycinamide formyltransferase 2 (EC 2.1.2.-)	-3.39975	19.98107	7e-05	down	-0.42788	173.12212	0.48388	-	287.71504	mono	mono
CH	RNA Metabolism	Queuosine-Archaeosine Biosynthesis	Permease of the drug/metabolite transporter (DMT) superfamily	2.28964	875.90315	0.03575	up	0.00446	194.59285	1	-	238.92204	mono	mono
CH	Membrane Transport	Queuosine-Archaeosine Biosynthesis	Permease of the drug/metabolite transporter (DMT) superfamily	2.28964	875.90315	0.03575	up	0.00446	194.59285	1	-	238.92204	mono	mono
Nuc	Metabolism of Aromatic Compounds	Benzoate transport and degradation cluster	Benzoyl-CoA oxygenase component A	-3.91474	4.86194	0.00318	down	-5.18078	1.73321	5.9e-4	down	75.04097	DOWNcore	core
CH	Nucleosides and Nucleotides	Purine conversions	Xanthine-guanine phosphoribosyltransferase (EC 2.4.2.22)	4.40568	627.4821	1.1e-4	up	0.14272	35.7672	0.87476	-	39.46055	mono	mono
CH	Stress Response	Dimethylarginine metabolism	NG,NG-dimethylarginine dimethylaminohydrolase 1 (EC 3.5.3.18)	-2.13581	9.72608	0.04853	down	-0.19859	40.16726	0.88868	-	58.57028	mono	mono
CH	Amino Acids	Arginine deiminase and agmatine deiminase pathways in Streptococci	NG,NG-dimethylarginine dimethylaminohydrolase 1 (EC 3.5.3.18)	-2.13581	9.72608	0.04853	down	-0.19859	40.16726	0.88868	-	58.57028	mono	mono
CH	Respiration	Respiration HGM	Ubiquinol-cytochrome C reductase iron-sulfur subunit (EC 1.10.2.2)	-2.87866	92.46021	1.9e-4	down	0.7232	1220.07658	0.23743	-	919.91813	mono	mono
CH	Mitochondrial electron transport system in plants	Respiratory complex III (cytochrome b-c1) in plants	Ubiquinol-cytochrome C reductase iron-sulfur subunit (EC 1.10.2.2)	-2.87866	92.46021	1.9e-4	down	0.7232	1220.07658	0.23743	-	919.91813	mono	mono
CH	Unclassified	Unclassified	AMP-dependent synthetase/ligase in alkane synthesis cluster	5.39408	1.00896	0.10437	-	9.37066	17.68862	0.01459	up	0	poly	poly
CH	Amino Acids	Common Pathway For Synthesis of Aromatic Compounds (DAHP synthase to chorismate)	Transcriptional repressor protein TyrR	6.10661	281.06659	1.4e-4	up	7.39196	760.07758	5e-05	up	5.65978	UPcore	core
CH	Phosphorus Metabolism	Phosphate metabolism	Exopolyphosphatase (EC 3.6.1.11)	2.84669	1815.66136	2.2e-4	up	-0.91015	143.54625	0.09582	-	339.83648	mono	mono
CH	Membrane Transport	Ton and Tol transport systems	4-hydroxybenzoyl-CoA thioesterase family active site	3.44175	538.98899	2.3e-4	up	1.06056	114.4557	0.11346	-	67.21889	mono	mono
CH	Amino Acids	Cysteine Biosynthesis	Sulfate transporter, CysZ-type	4.28652	356.10206	2.3e-4	up	2.21382	91.67806	0.0141	up	24.90013	UPcore	core
CH	Sulfur Metabolism	Inorganic Sulfur Assimilation	Sulfate transporter, CysZ-type	4.28652	356.10206	2.3e-4	up	2.21382	91.67806	0.0141	up	24.90013	UPcore	core
CH	Membrane Transport	Cysteine Biosynthesis	Sulfate transporter, CysZ-type	4.28652	356.10206	2.3e-4	up	2.21382	91.67806	0.0141	up	24.90013	UPcore	core
CH	Carbohydrates	Sugar utilization in Thermotogales	Beta-glucosidase (EC 3.2.1.21)	2.63243	66.81179	0.01755	up	4.11167	198.53281	0.00243	up	13.92574	UPcore	core
CH	Fatty Acids and Lipids	Isoprenoid Biosynthesis	Isopentenyl-diphosphate delta-isomerase, FMN-dependent (EC 5.3.3.2)	-3.03298	2.78512	0.0238	down	-5.46853	1.48009	0.00291	down	29.28605	DOWNcore	core
CH	Fatty Acids and Lipids	Triacylglycerol metabolism	Phospholipase A1 (EC 3.1.1.32) (EC 3.1.1.4)	5.67431	229.56789	0.01254	up	4.501	111.17438	0.03793	up	6.36748	UPcore	core
Nuc	Fatty Acids and Lipids	Fatty Acid Biosynthesis FASII	Enoyl-[acyl-carrier-protein] reductase [NADH] (EC 1.3.1.9)	-1.82679	227.32444	0.01196	down	-1.8147	201.83242	0.01616	down	793.85206	DOWNcore	core
Nuc	Cell Wall and Capsule	mycolic acid synthesis	Enoyl-[acyl-carrier-protein] reductase [NADH] (EC 1.3.1.9)	-1.82679	227.32444	0.01196	down	-1.8147	201.83242	0.01616	down	793.85206	DOWNcore	core
CH	DNA Metabolism	DNA repair, bacterial	DNA polymerase IV (EC 2.7.7.7)	2.08307	204.08408	0.018	up	1.17585	118.37658	0.16087	-	64.13605	mono	mono
CH	Carbohydrates	Chitin and N-acetylglucosamine utilization	N-Acetyl-D-glucosamine ABC transport system, permease protein 1	NA	41.6713	0.0162	up	NA	0	0.13083	-	1.43093	mono	mono
CH	Membrane Transport	Chitin and N-acetylglucosamine utilization	N-Acetyl-D-glucosamine ABC transport system, permease protein 1	NA	41.6713	0.0162	up	NA	0	0.13083	-	1.43093	mono	mono
Nuc	Carbohydrates	D-ribose utilization	Ribose operon repressor	4.97703	39.93748	0.00295	up	4.38806	21.3003	0.00672	up	1.22547	UPcore	core
CH	Stress Response	Nudix KE	Mutator mutT protein (7,8-dihydro-8-oxoguanine-triphosphatase) (EC 3.6.1.-)	3.91555	201.06056	4.1e-4	up	0.21653	17.083	0.81653	-	17.89893	mono	mono
CH	Protein Metabolism	Ribosome biogenesis bacterial	hypothetical protein sometimes fused to ribosomal protein S6 glutaminyl transferase	-2.24609	32.04485	0.0003	down	0.87385	305.25467	0.093410000000000007	-	205.57599	mono	mono
CH	Membrane Transport	Type IV pilus	Type IV fimbrial biogenesis protein PilY1	-0.87436	101.53481	0.50155	-	3.83584	2867.95211	0.02343	up	250.13102	poly	poly
CH	Motility and Chemotaxis	Bacterial motility:Gliding	Type IV fimbrial biogenesis protein PilY1	-0.87436	101.53481	0.50155	-	3.83584	2867.95211	0.02343	up	250.13102	poly	poly
CH	Carbohydrates	D-Galacturonate and D-Glucuronate Utilization	Ketoglutarate semialdehyde dehydrogenase (EC 1.2.1.26)	3.83036	483.627	5.3e-4	up	0.99781	73.1115	0.21774	-	46.23071	mono	mono
CH	Amino Acids	Proline, 4-hydroxyproline uptake and utilization	Ketoglutarate semialdehyde dehydrogenase (EC 1.2.1.26)	3.83036	483.627	5.3e-4	up	0.99781	73.1115	0.21774	-	46.23071	mono	mono
CH	Protein Metabolism	Universal GTPases	50S ribosomal subunit maturation GTPase RbgA (B. subtilis YlqF)	2.84634	866.00467	6.5e-4	up	0.25617	155.17037	0.70855	-	157.79389	mono	mono
CH	Unclassified	Unclassified	Nudix hydrolase family protein YffH	9.19904	572.37727	0.00187	up	-1.85082	0.62239	0.56658	-	1.22547	mono	mono
CH	RNA Metabolism	Transcription initiation, bacterial sigma factors	RNA polymerase sigma factor RpoE	1.47832	1509.15053	0.04484	up	3.35743	6062.70103	6.7e-4	up	747.18932	UPcore	core
CH	Fatty Acids and Lipids	Carotenoid biosynthesis	Phytoene synthase (EC 2.5.1.32)	-3.06199	31.16752	7.1e-4	down	-0.82408	165.30195	0.26414	-	360.06857	mono	mono
CH	Photosynthesis	Proteorhodopsin	Phytoene synthase (EC 2.5.1.32)	-3.06199	31.16752	7.1e-4	down	-0.82408	165.30195	0.26414	-	360.06857	mono	mono
CH	Carbohydrates	Glycolysis and Gluconeogenesis	Glucokinase (EC 2.7.1.2)	3.1919	576.10947	8.1e-4	up	1.37879	175.23625	0.06781	-	85.54876	mono	mono
CH	Unclassified	Unclassified	Flagellar basal-body P-ring formation protein FlgA	9.26229	1990.59253	8.3e-4	up	5.7984	191.59615	0.00923	up	4.38592	UPcore	core
CH	Carbohydrates	TCA Cycle	Malate dehydrogenase (EC 1.1.1.37)	-2.38619	167.61988	8.6e-4	down	0.645	1499.27886	0.30337	-	1202.31091	mono	mono
CH	Miscellaneous	Metabolite repair	Malate dehydrogenase (EC 1.1.1.37)	-2.38619	167.61988	8.6e-4	down	0.645	1499.27886	0.30337	-	1202.31091	mono	mono
CH	Unclassified	CBSS-195102.1.peg.963	Malate dehydrogenase (EC 1.1.1.37)	-2.38619	167.61988	8.6e-4	down	0.645	1499.27886	0.30337	-	1202.31091	mono	mono
CH	Unclassified	Unclassified	General secretion pathway protein C	1.17556	4.60813	0.54194	-	6.08217	153.29105	0.017	up	2.73583	poly	poly
CH	RNA Metabolism	RNA pseudouridine syntheses	tRNA pseudouridine synthase A (EC 4.2.1.70)	2.4297	984.56792	9.2e-4	up	0.44444	269.59899	0.45134	-	246.91125	mono	mono
CH	Virulence	Colicin V and Bacteriocin Production Cluster	tRNA pseudouridine synthase A (EC 4.2.1.70)	2.4297	984.56792	9.2e-4	up	0.44444	269.59899	0.45134	-	246.91125	mono	mono
CH	Nucleosides and Nucleotides	Purine conversions	Adenylosuccinate lyase (EC 4.3.2.2)	-2.12793	113.52114	9.5e-4	down	-1.88388	147.18953	0.00279	down	676.43785	DOWNcore	core
CH	Virulence	Multidrug Resistance Efflux Pumps	Membrane fusion protein of RND family multidrug efflux pump	2.28411	276.64006	0.00102	up	3.24273	579.07283	9e-05	up	77.18237	UPcore	core
CH	Vitamins	dcernst CoA Salvage	Pantoate--beta-alanine ligase (EC 6.3.2.1)	-2.30849	87.26948	0.00105	down	-2.43521	87.54088	8.6e-4	down	580.48095	DOWNcore	core
CH	Unclassified	Family 24 FUPA24 P-type ATPase ver.1	Pantoate--beta-alanine ligase (EC 6.3.2.1)	-2.30849	87.26948	0.00105	down	-2.43521	87.54088	8.6e-4	down	580.48095	DOWNcore	core
CH	Amino Acids	Polyamine Metabolism	Spermidine Putrescine ABC transporter permease component PotB (TC 3.A.1.11.1)	3.2376	217.46866	0.00113	up	-1.84797	6.93806	0.02505	down	30.50606	monoUP-polyDOWN	mixed
CH	Membrane Transport	Polyamine Metabolism	Spermidine Putrescine ABC transporter permease component PotB (TC 3.A.1.11.1)	3.2376	217.46866	0.00113	up	-1.84797	6.93806	0.02505	down	30.50606	monoUP-polyDOWN	mixed
CH	Potassium metabolism	Potassium homeostasis	Osmosensitive K+ channel histidine kinase KdpD (EC 2.7.3.-)	4.04617	519.5039	0.00115	up	1.42698	92.64433	0.13209	-	42.97347	mono	mono
CH	Amino Acids	Creatine and Creatinine Degradation	N-methylhydantoinase A (EC 3.5.2.14)	-2.85963	34.37886	0.00127	down	-4.08503	15.87964	1.1e-4	down	328.15726	DOWNcore	core
CH	Nucleosides and Nucleotides	Hydantoin metabolism	N-methylhydantoinase A (EC 3.5.2.14)	-2.85963	34.37886	0.00127	down	-4.08503	15.87964	1.1e-4	down	328.15726	DOWNcore	core
CH	DNA Metabolism	DNA-replication	Chromosomal replication initiator protein DnaA	-1.18148	408.4685	0.03304	down	-0.82476	572.79185	0.1423	-	1251.83228	mono	mono
CH	Motility and Chemotaxis	Bacterial Chemotaxis	Chemotaxis regulator - transmits chemoreceptor signals to flagelllar motor components CheY	3.73446	5052.0956	0.00138	up	2.95078	3162.5027	0.00658	up	514.1027	UPcore	core
CH	Regulation and Cell signaling	Two-component regulatory systems in Campylobacter	Chemotaxis regulator - transmits chemoreceptor signals to flagelllar motor components CheY	3.73446	5052.0956	0.00138	up	2.95078	3162.5027	0.00658	up	514.1027	UPcore	core
CH	Virulence	C jejuni colonization of chick caeca	Chemotaxis regulator - transmits chemoreceptor signals to flagelllar motor components CheY	3.73446	5052.0956	0.00138	up	2.95078	3162.5027	0.00658	up	514.1027	UPcore	core
CH	Carbohydrates	Pyruvate metabolism I: anaplerotic reactions, PEP	Oxaloacetate decarboxylase beta chain (EC 4.1.1.3)	-2.199	214.18496	0.00139	down	-0.78959	620.80685	0.1863	-	1340.89491	mono	mono
CH	Miscellaneous	EC 4. 1. 1.- Carboxy-lyases	Oxaloacetate decarboxylase beta chain (EC 4.1.1.3)	-2.199	214.18496	0.00139	down	-0.78959	620.80685	0.1863	-	1340.89491	mono	mono
CH	Respiration	Na+ translocating decarboxylases and related biotin-dependent enzymes	Oxaloacetate decarboxylase beta chain (EC 4.1.1.3)	-2.199	214.18496	0.00139	down	-0.78959	620.80685	0.1863	-	1340.89491	mono	mono
CH	Unclassified	Unclassified	Myo-inositol 2-dehydrogenase 2 (EC 1.1.1.18)	12.33816	124.86964	0.00156	up	6.91916	9.62061	0.03836	up	0	UPcore	core
CH	Fatty Acids and Lipids	Carotenoid biosynthesis	Phytoene desaturase (EC 1.14.99.-)	NA	0	0.04617	down	NA	0	0.08207	-	3.33304	mono	mono
CH	Vitamins	Folate Biosynthesis	Folylpolyglutamate synthase (EC 6.3.2.17)	-2.67253	17.26697	0.00163	down	-1.38494	47.54371	0.06229	-	152.80329	mono	mono
CH	Virulence	Colicin V and Bacteriocin Production Cluster	Folylpolyglutamate synthase (EC 6.3.2.17)	-2.67253	17.26697	0.00163	down	-1.38494	47.54371	0.06229	-	152.80329	mono	mono
CH	Unclassified	Unclassified	D-serine/D-alanine/glycine transporter	NA	80.59957	0.04784	up	NA	0	0.45147	-	1.25652	mono	mono
CH	Virulence	Cobalt-zinc-cadmium resistance	DNA-binding heavy metal response regulator	-2.25067	24.17391	0.04362	down	-2.28427	27.11536	0.05051	-	160.67482	mono	mono
CH	Nitrogen Metabolism	Nitrate and nitrite ammonification	Nitrite reductase probable [NAD(P)H] subunit (EC 1.7.1.4)	-2.84125	6.06488	0.00163	down	-2.18404	10.27396	0.01017	down	58.2297	DOWNcore	core
Nuc	Regulation and Cell signaling	Sex pheromones in Enterococcus faecalis and other Firmicutes	Oligopeptide ABC transporter, periplasmic oligopeptide-binding protein OppA (TC 3.A.1.5.1)	-1.40824	105.86263	0.04538	down	-1.1185	115.84494	0.12761	-	278.71129	mono	mono
Nuc	Membrane Transport	ABC transporter oligopeptide (TC 3.A.1.5.1)	Oligopeptide ABC transporter, periplasmic oligopeptide-binding protein OppA (TC 3.A.1.5.1)	-1.40824	105.86263	0.04538	down	-1.1185	115.84494	0.12761	-	278.71129	mono	mono
CH	DNA Metabolism	DNA structural proteins, bacterial	DNA-binding protein Fis	-2.14359	25.60651	0.00171	down	-1.10797	56.29928	0.0674	-	150.88574	mono	mono
CH	Amino Acids	Glycine and Serine Utilization	D-serine dehydratase transcriptional activator	8.51354	127.50455	0.00125	up	0.41974	1.24479	0.8872	-	0.2986	mono	mono
CH	Regulation and Cell signaling	Two-component regulatory systems in Campylobacter	Positive regulator of CheA protein activity (CheW)	3.42162	3504.63173	0.00187	up	2.35527	1820.9191	0.01694	up	434.92534	UPcore	core
CH	Motility and Chemotaxis	Bacterial Chemotaxis	Positive regulator of CheA protein activity (CheW)	3.42162	3504.63173	0.00187	up	2.35527	1820.9191	0.01694	up	434.92534	UPcore	core
CH	Unclassified	CBSS-565654.4.peg.3098 cAD1 cluster	Cytochrome d ubiquinol oxidase subunit I (EC 1.10.3.-)	3.65129	532.40689	0.01002	up	1.61163	141.52218	0.18988	-	58.46525	mono	mono
CH	Respiration	Terminal cytochrome d ubiquinol oxidases	Cytochrome d ubiquinol oxidase subunit I (EC 1.10.3.-)	3.65129	532.40689	0.01002	up	1.61163	141.52218	0.18988	-	58.46525	mono	mono
CH	Carbohydrates	D-ribose utilization	Predicted nucleoside ABC transporter, permease 1 component	3.80579	135.57019	0.00196	up	-2.09129	2.49622	0.04753	down	13.17329	monoUP-polyDOWN	mixed
CH	Membrane Transport	D-ribose utilization	Predicted nucleoside ABC transporter, permease 1 component	3.80579	135.57019	0.00196	up	-2.09129	2.49622	0.04753	down	13.17329	monoUP-polyDOWN	mixed
CH	Cell Wall and Capsule	KDO2-Lipid A biosynthesis	Predicted hydrolase of the metallo-beta-lactamase superfamily, clustered with KDO2-Lipid A biosynthesis genes	5.97755	184.10063	0.0027	up	3.34673	32.95531	0.04223	up	3.97683	UPcore	core
CH	Metabolism of Aromatic Compounds	Biphenyl Degradation	biphenyl-2,3-diol 1,2-dioxygenase III-related protein	5.16493	159.15724	0.00214	up	0.26432	5.75147	0.86847	-	6.28986	mono	mono
CH	Respiration	Respiratory Complex I	NADH-ubiquinone oxidoreductase chain G (EC 1.6.5.3)	-2.03463	69.35998	0.00218	down	0.52904	445.29353	0.39006	-	379.14994	mono	mono
CH	Metabolism of Aromatic Compounds	Phenylpropanoid compound degradation	Probable VANILLIN dehydrogenase oxidoreductase protein (EC 1.-.-.-)	NA	30.77174	0.00218	up	NA	0	0.34686	-	0.2986	mono	mono
CH	Carbohydrates	Citrate Metabolism KE	Succinyl-CoA:3-ketoacid-coenzyme A transferase subunit B (EC 2.8.3.5)	2.02286	1044.40296	0.00948	up	2.71888	1826.82566	0.00222	up	348.08951	UPcore	core
CH	Amino Acids	Branched chain amino acid degradation regulons	Succinyl-CoA:3-ketoacid-coenzyme A transferase subunit B (EC 2.8.3.5)	2.02286	1044.40296	0.00948	up	2.71888	1826.82566	0.00222	up	348.08951	UPcore	core
CH	Metabolism of Aromatic Compounds	Protocatechuate branch of beta-ketoadipate pathway	Succinyl-CoA:3-ketoacid-coenzyme A transferase subunit B (EC 2.8.3.5)	2.02286	1044.40296	0.00948	up	2.71888	1826.82566	0.00222	up	348.08951	UPcore	core
CH	Stress Response	Glutaredoxins	Glutaredoxin 3	-3.80087	2.15184	0.00247	down	-2.81152	4.79037	0.01625	down	42.68856	DOWNcore	core
CH	Amino Acids	Arginine and Ornithine Degradation	Succinylglutamate desuccinylase (EC 3.5.1.96)	5.77052	406.44103	1.4e-4	up	2.92963	63.30534	0.00829	up	10.34249	UPcore	core
CH	Carbohydrates	Lactate utilization temp	Phosphoenolpyruvate carboxylase (EC 4.1.1.31)	2.38811	728.07352	0.00339	up	1.78848	525.28436	0.01983	up	188.75821	UPcore	core
CH	Amino Acids	Glutamine, glutamate, aspartate, asparagine metabolism in plants	Phosphoenolpyruvate carboxylase (EC 4.1.1.31)	2.38811	728.07352	0.00339	up	1.78848	525.28436	0.01983	up	188.75821	UPcore	core
CH	Vitamins	Biotin synthesis & utilization	Phosphoenolpyruvate carboxylase (EC 4.1.1.31)	2.38811	728.07352	0.00339	up	1.78848	525.28436	0.01983	up	188.75821	UPcore	core
CH	Miscellaneous	Metabolite repair	5-nucleotidase SurE (EC 3.1.3.5)	1.71609	235.99791	0.01246	up	0.92286	150.99157	0.1543	-	98.86273	mono	mono
CH	Stress Response	Housecleaning nucleoside triphosphate pyrophosphatases	5-nucleotidase SurE (EC 3.1.3.5)	1.71609	235.99791	0.01246	up	0.92286	150.99157	0.1543	-	98.86273	mono	mono
CH	Respiration	Respiratory Complex I	NADH-ubiquinone oxidoreductase chain F (EC 1.6.5.3)	-2.12353	66.99663	0.00285	down	0.17777	358.56243	0.81653	-	385.08465	mono	mono
CH	Miscellaneous	Metabolite repair	NADH-ubiquinone oxidoreductase chain F (EC 1.6.5.3)	-2.12353	66.99663	0.00285	down	0.17777	358.56243	0.81653	-	385.08465	mono	mono
CH	Vitamins	YgfZ	NADH-ubiquinone oxidoreductase chain F (EC 1.6.5.3)	-2.12353	66.99663	0.00285	down	0.17777	358.56243	0.81653	-	385.08465	mono	mono
CH	Motility and Chemotaxis	Bacterial Chemotaxis	Methyl-accepting chemotaxis protein I (serine chemoreceptor protein)	3.21183	2876.20075	0.00866	up	4.06501	5647.68458	0.00341	up	426.33838	UPcore	core
CH	Fatty Acids and Lipids	Glycerolipid and Glycerophospholipid Metabolism in Bacteria	Aldehyde dehydrogenase B (EC 1.2.1.22)	1.34997	418.77163	0.0443	up	-0.3734	137.92077	0.58604	-	219.69071	mono	mono
CH	Carbohydrates	Methylglyoxal Metabolism	Aldehyde dehydrogenase B (EC 1.2.1.22)	1.34997	418.77163	0.0443	up	-0.3734	137.92077	0.58604	-	219.69071	mono	mono
CH	Amino Acids	Putrescine utilization pathways	Gamma-glutamyl-putrescine oxidase (EC1.4.3.-)	4.45246	1523.09925	0.01424	up	2.30149	375.1714	0.14696	-	94.93976	mono	mono
CH	Carbohydrates	Inositol catabolism	Predicted transcriptional regulator of the myo-inositol catabolic operon	8.2368	69.36158	0.00334	up	4.17262	6.9128	0.06854	-	0.56616	mono	mono
CH	Motility and Chemotaxis	Flagellum	Flagellar biosynthesis protein FliQ	3.02325	128.8583	0.00347	up	1.94806	67.20603	0.03728	up	21.73785	UPcore	core
CH	Stress Response	Ectoine biosynthesis and regulation	Putative regulatory protein associated with the ectoine operon	4.24761	189.18765	0.00375	up	0.08723	11.36853	0.97247	-	13.04181	mono	mono
CH	Amino Acids	Polyamine Metabolism	ABC transporter, periplasmic spermidine putrescine-binding protein PotD (TC 3.A.1.11.1)	4.12957	3559.75163	0.004	up	0.87957	409.41304	0.44235	-	275.29498	mono	mono
CH	Membrane Transport	Polyamine Metabolism	ABC transporter, periplasmic spermidine putrescine-binding protein PotD (TC 3.A.1.11.1)	4.12957	3559.75163	0.004	up	0.87957	409.41304	0.44235	-	275.29498	mono	mono
CH	Amino Acids	Cyanophycin Metabolism	Cyanophycin synthase (EC 6.3.2.29)(EC 6.3.2.30)	0.16808	117.78133	0.89128	-	3.33035	1143.41965	0.01515	up	140.324	poly	poly
CH	Carbohydrates	D-galactonate catabolism	2-dehydro-3-deoxygalactonokinase (EC 2.7.1.58)	5.39281	107.68861	0.00404	up	1.87168	9.98298	0.20528	-	3.53668	mono	mono
CH	Carbohydrates	Malonate_	Malonate transporter, MadL subunit	NA	25.71171	0.02995	up	NA	0	0.04741	down	2.34226	monoUP-polyDOWN	mixed
CH	Membrane Transport	Malonate_	Malonate transporter, MadL subunit	NA	25.71171	0.02995	up	NA	0	0.04741	down	2.34226	monoUP-polyDOWN	mixed
CH	Cell Wall and Capsule	LOS core oligosaccharide biosynthesis	Putative two-domain glycosyltransferase	4.38423	326.18029	0.00404	up	-0.10916	15.38627	0.95967	-	20.09783	mono	mono
CH	RNA Metabolism	Transcription initiation, bacterial sigma factors	RNA polymerase sigma factor RpoD	-1.96924	630.24889	0.00426	down	-0.77394	1594.40662	0.22058	-	3354.44356	mono	mono
CH	Cell Division and Cell Cycle	Macromolecular synthesis operon	RNA polymerase sigma factor RpoD	-1.96924	630.24889	0.00426	down	-0.77394	1594.40662	0.22058	-	3354.44356	mono	mono
CH	Motility and Chemotaxis	Flagellum	RNA polymerase sigma factor RpoD	-1.96924	630.24889	0.00426	down	-0.77394	1594.40662	0.22058	-	3354.44356	mono	mono
CH	Carbohydrates	D-galactonate catabolism	2-dehydro-3-deoxyphosphogalactonate aldolase (EC 4.1.2.21)	7.09551	168.86909	0.00433	up	2.55245	11.60348	0.18067	-	1.72953	mono	mono
CH	Respiration	Terminal cytochrome C oxidases	Alternative cytochrome c oxidase polypeptide CoxO (EC 1.9.3.1)	-2.9529	6.80635	0.00437	down	-2.55088	9.48806	0.01312	down	70.07987	DOWNcore	core
CH	Fatty Acids and Lipids	Polyhydroxybutyrate metabolism	Intracellular PHB depolymerase (EC 3.1.1.-)	-2.51324	9.08656	0.01099	down	-1.89737	15.25946	0.05054	-	68.75302	mono	mono
CH	Carbohydrates	Entner-Doudoroff Pathway	2-dehydro-3-deoxyphosphogluconate aldolase (EC 4.1.2.14)	-2.75526	5.70936	0.00751	down	-0.0002	40.59958	1	-	52.25119	mono	mono
CH	Miscellaneous	EC 4.1.2.- Aldehyde-lyases	2-dehydro-3-deoxyphosphogluconate aldolase (EC 4.1.2.14)	-2.75526	5.70936	0.00751	down	-0.0002	40.59958	1	-	52.25119	mono	mono
CH	Carbohydrates	Inositol catabolism	Inositol transport system sugar-binding protein	4.55836	402.64264	0.00472	up	-0.27631	15.85024	0.85744	-	23.81438	mono	mono
CH	Membrane Transport	Inositol catabolism	Inositol transport system sugar-binding protein	4.55836	402.64264	0.00472	up	-0.27631	15.85024	0.85744	-	23.81438	mono	mono
CH	Fatty Acids and Lipids	Carotenoid biosynthesis	Beta-carotene ketolase (EC 1.14.-.-)	-0.72366	33.66417	0.27112000000000003	-	-1.97326	15.36286	0.00947	down	73.94707	poly	poly
CH	Photosynthesis	Proteorhodopsin	Beta-carotene ketolase (EC 1.14.-.-)	-0.72366	33.66417	0.27112000000000003	-	-1.97326	15.36286	0.00947	down	73.94707	poly	poly
CH	Vitamins	Test - Thiamin	Sulfur carrier protein adenylyltransferase ThiF	-2.63457	11.06261	0.00482	down	-0.38202	57.42452	0.67434	-	95.21278	mono	mono
CH	Unclassified	Unclassified	Protein with domain from phenylalanyl-tRNA synthetase alpha chain	NA	50.63849	0.00528	up	NA	0	1	-	0	mono	mono
CH	Regulation and Cell signaling	DNA-binding regulatory proteins, strays	LysR family transcriptional regulator YbhD	5.35275	96.18526	0.00539	up	-3.13618	0.74005	0.11403	-	3.09654	mono	mono
CH	Protein Metabolism	Ribosome LSU bacterial	LSU ribosomal protein L25p	-2.35871	308.24117	0.00548	down	-1.81512	483.44596	0.02682	down	2154.11312	DOWNcore	core
CH	Stress Response	Oxidative stress	Manganese superoxide dismutase (EC 1.15.1.1)	-2.50457	30.95572	0.00565	down	-0.89207	106.47364	0.28035	-	234.94781	mono	mono
CH	Nitrogen Metabolism	Nitric oxide synthase	Manganese superoxide dismutase (EC 1.15.1.1)	-2.50457	30.95572	0.00565	down	-0.89207	106.47364	0.28035	-	234.94781	mono	mono
CH	Carbohydrates	Sucrose utilization	Fructokinase (EC 2.7.1.4)	3.4695	239.95545	0.00578	up	0.36406	30.36834	0.7483	-	29.91613	mono	mono
CH	Cell Wall and Capsule	Alginate metabolism	poly(beta-D-mannuronate) lyase (EC 4.2.2.3)	-3.53967	2.05353	0.01315	down	1.14396	58.9387	0.39376	-	34.11854	mono	mono
CH	Amino Acids	Valine degradation	Branched-chain alpha-keto acid dehydrogenase, E1 component, alpha subunit (EC 1.2.4.4)	3.89695	2932.05482	0.00998	up	2.3626	1103.7057	0.08015	-	267.08565	mono	mono
CH	Carbohydrates	Dehydrogenase complexes	Branched-chain alpha-keto acid dehydrogenase, E1 component, alpha subunit (EC 1.2.4.4)	3.89695	2932.05482	0.00998	up	2.3626	1103.7057	0.08015	-	267.08565	mono	mono
CH	Unclassified	TN RidA: all subgroups, 981 genomes	Branched-chain alpha-keto acid dehydrogenase, E1 component, alpha subunit (EC 1.2.4.4)	3.89695	2932.05482	0.00998	up	2.3626	1103.7057	0.08015	-	267.08565	mono	mono
CH	Amino Acids	Cinnamic Acid Degradation	3-(3-hydroxy-phenyl)propionate hydroxylase (EC 1.14.13.-)	7.76041	29.84287	0.00589	up	1.82277	1.48009	0.48591	-	0.31413	mono	mono
CH	Metabolism of Aromatic Compounds	Central meta-cleavage pathway of aromatic compound degradation	3-(3-hydroxy-phenyl)propionate hydroxylase (EC 1.14.13.-)	7.76041	29.84287	0.00589	up	1.82277	1.48009	0.48591	-	0.31413	mono	mono
CH	Amino Acids	Histidine Degradation in Streptococci	Histidine ammonia-lyase (EC 4.3.1.3)	2.04755	317.10688	0.00589	up	1.47066	229.08246	0.03655	up	102.37382	UPcore	core
CH	Miscellaneous	COG0523-Histidine	Histidine ammonia-lyase (EC 4.3.1.3)	2.04755	317.10688	0.00589	up	1.47066	229.08246	0.03655	up	102.37382	UPcore	core
CH	Amino Acids	Chorismate biosynthesis in Streptococci	Shikimate kinase I (EC 2.7.1.71)	1.89646	709.26489	0.00589	up	1.25813	492.88675	0.04997	up	257.10491	UPcore	core
CH	Metabolism of Aromatic Compounds	Benzoate transport and degradation cluster	Shikimate kinase I (EC 2.7.1.71)	1.89646	709.26489	0.00589	up	1.25813	492.88675	0.04997	up	257.10491	UPcore	core
CH	Virulence	Legionella pneumophila Virulome	Flagellar motor switch protein FliN	2.27494	719.87837	0.00593	up	1.65311	512.17328	0.03414	up	204.43534	UPcore	core
CH	Motility and Chemotaxis	Bacterial Chemotaxis	Flagellar motor switch protein FliN	2.27494	719.87837	0.00593	up	1.65311	512.17328	0.03414	up	204.43534	UPcore	core
CH	Carbohydrates	L-Arabinose CS	L-arabinose-binding periplasmic protein precursor AraF (TC 3.A.1.2.2)	7.64355	247.36011	0.00598	up	-0.73239	1.05124	0.79516	-	1.60351	mono	mono
CH	Arabinose Sensor and transport module	An Arabinose Sensor	L-arabinose-binding periplasmic protein precursor AraF (TC 3.A.1.2.2)	7.64355	247.36011	0.00598	up	-0.73239	1.05124	0.79516	-	1.60351	mono	mono
CH	Unclassified	Unclassified	Rhamnogalacturonides degradation protein RhiN	9.98309	24.06307	0.00598	up	10.15156	29.78961	0.00718	up	0	UPcore	core
CH	Protein Metabolism	Ribosome activity modulation	Ribosome hibernation protein YhbH	2.69493	2870.68695	0.00598	up	1.853	1738.10921	0.04188	up	603.92507	UPcore	core
CH	Virulence	Legionella pneumophila Virulome	Flagellar motor switch protein FliM	2.15486	1249.49127	0.00599	up	1.13363	678.04703	0.10833	-	385.81976	mono	mono
CH	Motility and Chemotaxis	Bacterial Chemotaxis	Flagellar motor switch protein FliM	2.15486	1249.49127	0.00599	up	1.13363	678.04703	0.10833	-	385.81976	mono	mono
CH	Carbohydrates	beta carboxysome	Sensory subunit of low CO2-induced protein complex, putative	-2.95392	25.71556	0.0064	down	-0.72188	131.60533	0.47552	-	275.81179	mono	mono
CH	Amino Acids	PII Superfamily	Sensory subunit of low CO2-induced protein complex, putative	-2.95392	25.71556	0.0064	down	-0.72188	131.60533	0.47552	-	275.81179	mono	mono
CH	Sulfur Metabolism	CFE Sulfur Oxidation	Sulfur oxidation protein SoxB	-1.54549	25.72914	0.21083	-	-2.73179	12.06175	0.04763	down	101.793	poly	poly
CH	Carbohydrates	Mannose Metabolism	Beta-mannosidase (EC 3.2.1.25)	-2.88278	2.89697	0.00665	down	-2.20424	4.98359	0.03197	down	30.44396	DOWNcore	core
CH	Vitamins	Quinones biosynthesis HGM	Naphthoate synthase (EC 4.1.3.36)	-2.36486	10.18826	0.00665	down	0.4313	79.04142	0.61819	-	72.65127	mono	mono
CH	Miscellaneous	EC 4.1.3.- Oxo-acid-lyases	Naphthoate synthase (EC 4.1.3.36)	-2.36486	10.18826	0.00665	down	0.4313	79.04142	0.61819	-	72.65127	mono	mono
CH	Miscellaneous	YgfZ-Fe-S	A/G-specific adenine glycosylase (EC 3.2.2.-)	3.54815	671.49643	0.00688	up	0.04733	64.67599	0.99571	-	78.89638	mono	mono
CH	DNA Metabolism	DNA repair, bacterial	A/G-specific adenine glycosylase (EC 3.2.2.-)	3.54815	671.49643	0.00688	up	0.04733	64.67599	0.99571	-	78.89638	mono	mono
CH	Metabolism of Aromatic Compounds	Gentisate degradation	putative 4-hydroxybenzoyl-CoA thioesterase	-3.88485	1.69052	0.00239	down	-6.48939	1.13378	3.2e-4	down	34.24637	DOWNcore	core
Nuc	Carbohydrates	Propionyl-CoA to Succinyl-CoA Module	Propionyl-CoA carboxylase biotin-containing subunit (EC 6.4.1.3)	-1.77932	88.37242	0.01412	down	-1.49363	90.68557	0.04356	down	304.9563	DOWNcore	core
Nuc	Central metabolism	EC 6.4.1.- Ligases that form carbon-carbon bonds	Propionyl-CoA carboxylase biotin-containing subunit (EC 6.4.1.3)	-1.77932	88.37242	0.01412	down	-1.49363	90.68557	0.04356	down	304.9563	DOWNcore	core
CH	Protein Metabolism	Single-copy ribosomal proteins	LSU ribosomal protein L17p	-1.94435	445.65361	0.00695	down	-2.02769	460.12432	0.00703	down	2338.75196	DOWNcore	core
CH	Amino Acids	Methionine Degradation	Methionine gamma-lyase (EC 4.4.1.11)	3.72728	154.94787	0.01035	up	5.71053	659.65582	0.00163	up	15.42241	UPcore	core
CH	Carbohydrates	Propionyl-CoA to Succinyl-CoA Module	Propionyl-CoA carboxylase carboxyl transferase subunit (EC 6.4.1.3)	-2.1297	64.10301	0.00695	down	-2.4403	54.16514	0.00392	down	380.29041	DOWNcore	core
CH	Central metabolism	EC 6.4.1.- Ligases that form carbon-carbon bonds	Propionyl-CoA carboxylase carboxyl transferase subunit (EC 6.4.1.3)	-2.1297	64.10301	0.00695	down	-2.4403	54.16514	0.00392	down	380.29041	DOWNcore	core
CH	Nucleosides and Nucleotides	pyrimidine conversions	Nucleoside diphosphate kinase (EC 2.7.4.6)	-2.46868	157.11585	0.00202	down	-0.80859	538.92187	0.25096	-	1173.49669	mono	mono
CH	Vitamins	Thiamin biosynthesis	Predicted thiamin transporter PnuT	-2.87524	2.67221	0.00708	down	1.22334	51.89346	0.22136	-	28.04506	mono	mono
CH	Membrane Transport	Thiamin biosynthesis	Predicted thiamin transporter PnuT	-2.87524	2.67221	0.00708	down	1.22334	51.89346	0.22136	-	28.04506	mono	mono
CH	Regulation and Cell signaling	DNA-binding regulatory proteins, strays	Alkanesulfonate utilization operon LysR-family regulator CbI	-0.18897	6.35022	0.89985	-	-3.24915	1.18928	0.04358	down	9.65031	poly	poly
CH	Photosynthesis	Photosystem II-type photosynthetic reaction center	Photosynthetic reaction center L subunit	-1.28726	14.72767	0.36003	-	-3.3644	3.57055	0.03994	down	46.3778	poly	poly
CH	Amino Acids	Arginine and Ornithine Degradation	Arginine ABC transporter, permease protein ArtQ	5.04598	486.04125	0.00828	up	-3.32384	1.57212	0.05708	-	19.96357	mono	mono
CH	Membrane Transport	Arginine and Ornithine Degradation	Arginine ABC transporter, permease protein ArtQ	5.04598	486.04125	0.00828	up	-3.32384	1.57212	0.05708	-	19.96357	mono	mono
CH	DNA Metabolism	DNA structural proteins, bacterial	DNA-binding protein HU-alpha	-4.00009	7.41706	0.02371	down	-1.56258	44.85835	0.34576	-	168.81545	mono	mono
CH	Carbohydrates	Malonate_	Malonate transporter, MadM subunit	1.13411	21.06498	0.40358	-	-3.05365	3.70024	0.04851	down	13.17147	poly	poly
CH	Membrane Transport	Malonate_	Malonate transporter, MadM subunit	1.13411	21.06498	0.40358	-	-3.05365	3.70024	0.04851	down	13.17147	poly	poly
CH	Unclassified	Unclassified	YafQ toxin protein	6.0113	16.27745	0.03126	up	8.24312	80.45792	0.01245	up	0.2986	UPcore	core
CH	Unclassified	Unclassified	Predicted transcriptional regulator of N-Acetylglucosamine utilization, LacI family	4.31592	0.7506	0.07579	-	8.82676	12.22305	0.00269	up	0	poly	poly
CH	Carbohydrates	Carboxysome	Carbonic anhydrase (EC 4.2.1.1)	-1.71882	90.49451	0.00942	down	0.02208	331.11418	1	-	406.5193	mono	mono
CH	Regulation and Cell signaling	Zinc regulated enzymes	Carbonic anhydrase (EC 4.2.1.1)	-1.71882	90.49451	0.00942	down	0.02208	331.11418	1	-	406.5193	mono	mono
CH	Virulence	Bacterial cyanide production and tolerance mechanisms	Carbonic anhydrase (EC 4.2.1.1)	-1.71882	90.49451	0.00942	down	0.02208	331.11418	1	-	406.5193	mono	mono
CH	Metabolite processes	RidA proteins copy with new groups	Carbonic anhydrase (EC 4.2.1.1)	-1.71882	90.49451	0.00942	down	0.02208	331.11418	1	-	406.5193	mono	mono
CH	Nitrogen Metabolism	Cyanate hydrolysis	Carbonic anhydrase (EC 4.2.1.1)	-1.71882	90.49451	0.00942	down	0.02208	331.11418	1	-	406.5193	mono	mono
CH	Miscellaneous	EC 2.7.1.- Phosphotransferases with an alcohol group as acceptor	Diacylglycerol kinase (EC 2.7.1.107)	2.29479	181.18822	0.01035	up	1.00846	81.20209	0.21644	-	49.5236	mono	mono
CH	Fatty Acids and Lipids	Glycerolipid and Glycerophospholipid Metabolism in Bacteria	Diacylglycerol kinase (EC 2.7.1.107)	2.29479	181.18822	0.01035	up	1.00846	81.20209	0.21644	-	49.5236	mono	mono
CH	DNA Metabolism	DNA-replication	Primosomal replication protein N	-1.43086	23.71952	0.15314	-	2.60327	430.07497	0.031	up	87.65097	poly	poly
CH	Membrane Transport	Transport of Zinc	Zinc transporter, ZIP family	-2.04694	2.46742	0.10797	-	-3.15698	4.53512	0.04026	down	14.2554	poly	poly
CH	Stress Response	Oxidative stress	NnrS protein involved in response to NO	1.47374	2.49834	0.35481	-	5.57977	45.86687	0.00577	up	1.16337	poly	poly
CH	Nitrogen Metabolism	Denitrification	NnrS protein involved in response to NO	1.47374	2.49834	0.35481	-	5.57977	45.86687	0.00577	up	1.16337	poly	poly
CH	Stress Response	Choline and Betaine Uptake and Betaine Biosynthesis	L-proline glycine betaine ABC transport system permease protein ProW (TC 3.A.1.12.1)	1.67196	125.19901	0.12237	-	-2.59977	7.12654	0.02704	down	51.82389	poly	poly
CH	Membrane Transport	Choline and Betaine Uptake and Betaine Biosynthesis	L-proline glycine betaine ABC transport system permease protein ProW (TC 3.A.1.12.1)	1.67196	125.19901	0.12237	-	-2.59977	7.12654	0.02704	down	51.82389	poly	poly
CH	Unclassified	YggSProC	Inosose dehydratase (EC 4.2.1.44)	3.85322	126.42304	0.01073	up	2.6138	55.91781	0.06101	-	11.78712	mono	mono
CH	Carbohydrates	Inositol catabolism	Inosose dehydratase (EC 4.2.1.44)	3.85322	126.42304	0.01073	up	2.6138	55.91781	0.06101	-	11.78712	mono	mono
CH	Unclassified	Unclassified	Utilization protein for unknown catechol-siderophore X	NA	19.38992	0.011	up	NA	0	1	-	0	mono	mono
CH	Respiration	Respiratory dehydrogenases 1	Glucose-methanol-choline (GMC) oxidoreductase:NAD binding site	-2.55508	52.6063	3.1e-4	down	-1.08063	158.31808	0.06135	-	413.78556	mono	mono
CH	Unclassified	Unclassified	N-acetylglucosamine regulated methyl-accepting chemotaxis protein	9.52834	1250.03002	0.00141	up	8.07064	490.22334	0.00385	up	2.21625	UPcore	core
CH	Carbohydrates	Glycerol and Glycerol-3-phosphate Uptake and Utilization	Glycerol-3-phosphate ABC transporter, ATP-binding protein UgpC (TC 3.A.1.1.3)	4.74876	3399.71525	0.01137	up	-2.38381	26.30124	0.1108	-	164.40794	mono	mono
CH	Membrane Transport	Glycerol and Glycerol-3-phosphate Uptake and Utilization	Glycerol-3-phosphate ABC transporter, ATP-binding protein UgpC (TC 3.A.1.1.3)	4.74876	3399.71525	0.01137	up	-2.38381	26.30124	0.1108	-	164.40794	mono	mono
CH	Amino Acids	Arginine and Ornithine Degradation	Succinylornithine transaminase (EC 2.6.1.81)	-4.6095	1.77424	0.01155	down	0.36114	24.02417	0.8491	-	24.01984	mono	mono
CH	Amino Acids	Lysine fermentation	Electron transfer flavoprotein, alpha subunit	2.29362	11803.64031	0.01172	up	0.39196	3477.76094	0.65031	-	3307.16253	mono	mono
CH	Carbohydrates	Acetyl-CoA fermentation to Butyrate	Electron transfer flavoprotein, alpha subunit	2.29362	11803.64031	0.01172	up	0.39196	3477.76094	0.65031	-	3307.16253	mono	mono
CH	Vitamins	NADH-dependent reduced ferredoxin:NADDP+ oxidoreductase	Electron transfer flavoprotein, alpha subunit	2.29362	11803.64031	0.01172	up	0.39196	3477.76094	0.65031	-	3307.16253	mono	mono
CH	Nucleosides and Nucleotides	Purine conversions	Deoxyguanosine kinase (EC 2.7.1.113)	-3.35967	1.32838	0.01184	down	-4.20468	1.44498	0.00837	down	20.11882	DOWNcore	core
CH	Miscellaneous	EC 2.7.1.- Phosphotransferases with an alcohol group as acceptor	Deoxyguanosine kinase (EC 2.7.1.113)	-3.35967	1.32838	0.01184	down	-4.20468	1.44498	0.00837	down	20.11882	DOWNcore	core
Nuc	Stress Response	Nudix KE	Mutator mutT protein (7,8-dihydro-8-oxoguanine-triphosphatase) (EC 3.6.1.-)	2.97257	142.953	0.00584	up	2.8612	109.52739	0.0079	up	17.89893	UPcore	core
CH	Amino Acids	Arginine and Ornithine Degradation	Succinylarginine dihydrolase (EC 3.5.3.23)	6.72	833.96657	0.00104	up	4.05275	142.18001	0.01506	up	10.40094	UPcore	core
CH	Respiration	Respiration / Human gut microbiome	Cytochrome O ubiquinol oxidase subunit II (EC 1.10.3.-)	6.74418	2096.83039	0.0132	up	-4.76566	1.86718	0.0736	-	27.77291	mono	mono
CH	Carbohydrates	Pentose phosphate pathway	Ribose 5-phosphate isomerase A (EC 5.3.1.6)	0.57647	167.23654	0.26133	-	1.65299	378.47277	0.00715	up	146.7554	poly	poly
CH	Amino Acids	Aromatic amino acid degradation	Putative fumarylacetoacetate (FAA) hydrolase	2.29678	73.08925	0.04537	up	-4.79274	0.87809	0.00214	down	19.34538	monoUP-polyDOWN	mixed
CH	Stress Response	Bacterial hemoglobins	Hypothetical protein in Cyanoglobin locus	4.8127	287.98466	0.01368	up	1.1347	24.89803	0.49372	-	14.22799	mono	mono
Nuc	DNA Metabolism	CRISPRs	CRISPR-associated protein, Cse1 family	10.47355	46.05376	0.04418	up	8.47053	26.01211	0.10472	-	0	mono	mono
CH	Unclassified	Unclassified	MSHA biogenesis protein MshN	3.6533	0.37256	0.18574	-	9.60042	20.21012	0.00394	up	0	poly	poly
CH	Amino Acids	HMG-CoA	Dihydrolipoamide acyltransferase component of branched-chain alpha-keto acid dehydrogenase complex (EC 2.3.1.168)	-1.77344	120.53966	0.01398	down	0.50444	639.86389	0.49812	-	560.01937	mono	mono
CH	Vitamins	BEY LIP	Dihydrolipoamide acyltransferase component of branched-chain alpha-keto acid dehydrogenase complex (EC 2.3.1.168)	-1.77344	120.53966	0.01398	down	0.50444	639.86389	0.49812	-	560.01937	mono	mono
CH	Carbohydrates	Dehydrogenase complexes	Dihydrolipoamide acyltransferase component of branched-chain alpha-keto acid dehydrogenase complex (EC 2.3.1.168)	-1.77344	120.53966	0.01398	down	0.50444	639.86389	0.49812	-	560.01937	mono	mono
CH	Carbohydrates	Maltose and Maltodextrin Utilization	Alpha-glucosidase (EC 3.2.1.20)	3.97694	61.8487	0.01442	up	3.57837	50.15658	0.02829	up	5.03152	UPcore	core
CH	Stress Response	Glutathione: Biosynthesis and gamma-glutamyl cycle	Glutamate--cysteine ligase (EC 6.3.2.2), divergent, of Alpha- and Beta-proteobacteria type	-2.44155	7.71565	0.00811	down	-3.88993	3.04018	6.4e-4	down	56.46002	DOWNcore	core
CH	Vitamins	YgfZ	Glutamate--cysteine ligase (EC 6.3.2.2), divergent, of Alpha- and Beta-proteobacteria type	-2.44155	7.71565	0.00811	down	-3.88993	3.04018	6.4e-4	down	56.46002	DOWNcore	core
CH	Nucleosides and Nucleotides	Pyrimidine utilization	Pyrimidine ABC transporter, transmembrane component 2	NA	1.45847	0.41811	-	NA	0	0.0228	down	5.01236	poly	poly
CH	Membrane Transport	Pyrimidine utilization	Pyrimidine ABC transporter, transmembrane component 2	NA	1.45847	0.41811	-	NA	0	0.0228	down	5.01236	poly	poly
CH	Unclassified	Unclassified	Glucose/mannose:H+ symporter GlcP	4.67791	0.94574	0.2123	-	8.61381	10.56931	0.04164	up	0	poly	poly
CH	Protein Metabolism	Peptidyl-prolyl cis-trans isomerase	Peptidyl-prolyl cis-trans isomerase ppiC (EC 5.2.1.8)	2.00725	372.49896	0.01513	up	1.03305	204.34487	0.18547	-	123.97933	mono	mono
CH	Motility and Chemotaxis	Flagellum	Flagellar assembly protein FliH	3.76077	416.31033	0.00785	up	3.76676	450.48919	0.00974	up	41.27134	UPcore	core
CH	Protein Metabolism	Single-copy ribosomal proteins	LSU ribosomal protein L23p (L23Ae)	-1.46565	914.38161	0.12905	-	-2.15901	620.47374	0.04012	down	3394.55594	poly	poly
CH	RNA Metabolism	Transcription factors bacterial	COG2740: Predicted nucleic-acid-binding protein implicated in transcription termination	-0.87248	29.17625	0.39761	-	-3.8022	3.98769	0.00399	down	72.40834	poly	poly
CH	Amino Acids	Branched-Chain Amino Acid Biosynthesis	2-isopropylmalate synthase (EC 2.3.3.13)	-1.72332	447.941	0.005	down	-0.94588	853.606	0.09884	-	2049.47821	mono	mono
[truncated: 4,014 more rows]
